# Supplementary material for: Supramolecular Polynuclear Clusters Mediated Assembly of Cubic Hydrogen-Bonded Organic Frameworks with Octahedral Cages for Reversible Photochromism
Source: Research Square preprint supplement (doi:10.21203/rs.3.rs-3670187/v1), 2023-12-07

## checkCIF/PLATON report

Structure factors have been supplied for datablock(s) cu\_0315\_n3\_nh3\_br\_0m

THIS REPORT IS FOR GUIDANCE ONLY. IF USED AS PART OF A REVIEW PROCEDURE FOR PUBLICATION, IT SHOULD NOT REPLACE THE EXPERTISE OF AN EXPERIENCED CRYSTALLOGRAPHIC REFEREE.

No syntax errors found.      CIF dictionary      Interpreting this report

### Datablock: cu\_0315\_n3\_nh3\_br\_0m

---

Bond precision:      C-C = 0.0064 Å      Wavelength=1.54178

Cell:                      a=20.9596(12)      b=20.9596(12)      c=20.9596(12)  
                            alpha=90              beta=90              gamma=90

Temperature:      300 K

|                        | Calculated                                                    | Reported                                                        |
|------------------------|---------------------------------------------------------------|-----------------------------------------------------------------|
| Volume                 | 9207.7(16)                                                    | 9207.7(16)                                                      |
| Space group            | I 2 3                                                         | I 2 3                                                           |
| Hall group             | I 2 2 3                                                       | I 2 2 3                                                         |
| Moiety formula         | 2(C21 H12 N O6), 2(C21 H15 N O6), 2(C H Br3), 3(H O), 6(H4 N) | 2(C21 H12 N O6), 2(C21 H15 N O6), 6(H4 N), 1.5(H2 O2), 2(C H Br |
| Sum formula            | C86 H83 Br6 N10 O27                                           | C86 H83 Br6 N10 O27                                             |
| Mr                     | 2168.02                                                       | 2168.08                                                         |
| Dx, g cm <sup>-3</sup> | 1.564                                                         | 1.564                                                           |
| Z                      | 4                                                             | 4                                                               |
| Mu (mm <sup>-1</sup> ) | 3.846                                                         | 3.846                                                           |
| F000                   | 4380.0                                                        | 4380.0                                                          |
| F000'                  | 4375.98                                                       |                                                                 |
| h, k, lmax             |                                                               | 24, 24, 25                                                      |
| Nref                   |                                                               | 2828                                                            |
| Tmin, Tmax             | 0.502, 0.562                                                  | 0.668, 0.753                                                    |
| Tmin'                  | 0.441                                                         |                                                                 |

Correction method= # Reported T Limits: Tmin=0.668 Tmax=0.753

AbsCorr = NONE

Data completeness=

Theta(max)= 68.281

```
wR2 (reflections)=  
0.1932 ( 2828)
```

Npar= 194

test-name\_ALERT\_alert-type\_alert-level.

Click on the [hyperlinks](#) for more details of the test.

```

STRVA01_ALERT_4_C          Flack test results are ambiguous.
      From the CIF: _refine_ls_abs_structure_Flack          0.500
      From the CIF: _refine_ls_abs_structure_Flack_su      24.000
PLAT031_ALERT_4_C Refined Extinction Parameter Within Range of ...      3.000 Sigma
PLAT042_ALERT_1_C Calc. and Reported MoietyFormula Strings Differ      Please Check
      Calc: 2(C21 H12 N O6), 2(C21 H15 N O6), 2(C H Br3), 3(H O), 6(H4 N
      Rep.: 2(C21 H12 N O6), 2(C21 H15 N O6), 6(H4 N), 1.5(H2 O2), 2(C H
PLAT057_ALERT_3_C Correction for Absorption Required RT(exp) ...      1.12 Do !
PLAT090_ALERT_3_C Poor Data / Parameter Ratio (Zmax > 18) .....      7.93 Note
PLAT202_ALERT_3_C Isotropic non-H Atoms in Anion/Solvent .....      2 Check
      Br1          C5
PLAT250_ALERT_2_C Large U3/U1 Ratio for Average U(i,j) Tensor ....      3.7 Note
PLAT250_ALERT_2_C Large U3/U1 Ratio for Average U(i,j) Tensor ....      3.9 Note
PLAT260_ALERT_2_C Large Average Ueq of Residue Including          O00M      0.183 Check
PLAT341_ALERT_3_C Low Bond Precision on C-C Bonds .....      0.00643 Ang.
PLAT918_ALERT_3_C Reflection(s) with I(obs) much Smaller I(calc) .      4 Check
PLAT939_ALERT_3_C Large Value of Not (SHELXL) Weight Optimized S .      11.03 Check
PLAT976_ALERT_2_C Check Calcd Resid. Dens. 0.60Ang From O00M .      -0.49 eA-3
PLAT987_ALERT_1_C The Flack x is >> 0 - Do a BASF/TWIN Refinement      Please Check

```

|                   |                                                  |       |        |
|-------------------|--------------------------------------------------|-------|--------|
| PLAT002_ALERT_2_G | Number of Distance or Angle Restraints on AtSite | 2     | Note   |
| PLAT007_ALERT_5_G | Number of Unrefined Donor-H Atoms .....          | 5     | Report |
|                   | H003 H00M H00A H00C H00D                         |       |        |
| PLAT033_ALERT_4_G | Flack x Value Deviates > 3.0 * sigma from Zero . | 0.500 | Note   |
| PLAT072_ALERT_2_G | SHELXL First Parameter in WGHT Unusually Large   | 0.14  | Report |
| PLAT172_ALERT_4_G | The CIF-Embedded .res File Contains DFIX Records | 1     | Report |
| PLAT300_ALERT_4_G | Atom Site Occupancy of H00M Constrained at       | 0.5   | Check  |
| PLAT344_ALERT_2_G | Unusual Angle Range in Solvent/Ion for           | C5    | Check  |
| PLAT417_ALERT_2_G | Short Inter D-H..H-D H00D ..H00M .               | 1.93  | Ang.   |
|                   | x,y,z =                                          | 1_555 | Check  |
| PLAT432_ALERT_2_G | Short Inter X...Y Contact Br1 ..C00J .           | 3.35  | Ang.   |
|                   | x,y,z =                                          | 1_555 | Check  |
| PLAT720_ALERT_4_G | Number of Unusual/Non-Standard Labels .....      | 36    | Note   |
|                   | O001 O002 O003 H003 O004 N005 N006 H00A          |       |        |
|                   | H00C H00D H00H C007 C008 C009 C00A C00B          |       |        |
|                   | H00B C00C N00D C00E H00E C00F H00F C00G          |       |        |
|                   | H00G C00H C00I H00I C00J H00J C00K H00K          |       |        |
|                   | C00L H00L O00M H00M                              |       |        |
| PLAT722_ALERT_1_G | Angle Calc 85.00, Rep 86.10 Dev...               | 1.10  | Degree |
|                   | H00C -N006 -H00H 1_555 1_555 1_555 #             | 9     | Check  |
| PLAT790_ALERT_4_G | Centre of Gravity not Within Unit Cell: Resd. #  | 2     | Note   |
|                   | C21 H15 N O6                                     |       |        |
| PLAT860_ALERT_3_G | Number of Least-Squares Restraints .....         | 1     | Note   |

|                                                                    |            |
|--------------------------------------------------------------------|------------|
| PLAT910_ALERT_3_G Missing # of FCF Reflection(s) Below Theta(Min). | 2 Note     |
| 0 1 1, 0 0 2,                                                      |            |
| PLAT916_ALERT_2_G Hooft y and Flack x Parameter Values Differ by . | 0.41 Check |
| PLAT978_ALERT_2_G Number C-C Bonds with Positive Residual Density. | 4 Info     |

---

```

0 ALERT level A = Most likely a serious problem - resolve or explain
0 ALERT level B = A potentially serious problem, consider carefully
14 ALERT level C = Check. Ensure it is not caused by an omission or oversight
16 ALERT level G = General information/check it is not something unexpected

3 ALERT type 1 CIF construction/syntax error, inconsistent or missing data
11 ALERT type 2 Indicator that the structure model may be wrong or deficient
8 ALERT type 3 Indicator that the structure quality may be low
7 ALERT type 4 Improvement, methodology, query or suggestion
1 ALERT type 5 Informative message, check

```

---

## Validation response form

Please find below a validation response form (VRF) that can be filled in and pasted into your CIF.

```

# start Validation Reply Form
_vrf_STRVA01_cu_0315_n3_nh3_br_0m
;
PROBLEM: Flack test results are ambiguous.
RESPONSE: ...
;
_vrf_PLAT031_cu_0315_n3_nh3_br_0m
;
PROBLEM: Refined Extinction Parameter Within Range of ...      3.000 Sigma
RESPONSE: ...
;
_vrf_PLAT042_cu_0315_n3_nh3_br_0m
;
PROBLEM: Calc. and Reported MoietyFormula Strings Differ      Please Check
RESPONSE: ...
;
_vrf_PLAT057_cu_0315_n3_nh3_br_0m
;
PROBLEM: Correction for Absorption Required   RT(exp) ...      1.12 Do !
RESPONSE: ...
;
_vrf_PLAT090_cu_0315_n3_nh3_br_0m
;
PROBLEM: Poor Data / Parameter Ratio (Zmax > 18) .....      7.93 Note
RESPONSE: ...
;
_vrf_PLAT202_cu_0315_n3_nh3_br_0m
;
PROBLEM: Isotropic non-H Atoms in Anion/Solvent .....      2 Check
RESPONSE: ...
;
_vrf_PLAT250_cu_0315_n3_nh3_br_0m
;
PROBLEM: Large U3/U1 Ratio for Average U(i,j) Tensor ....      3.7 Note
RESPONSE: ...

```

```

;
_vrf_PLAT260_cu_0315_n3_nh3_br_0m
;
PROBLEM: Large Average Ueq of Residue Including      O00M      0.183 Check
RESPONSE: ...
;
_vrf_PLAT341_cu_0315_n3_nh3_br_0m
;
PROBLEM: Low Bond Precision on  C-C Bonds .....      0.00643 Ang.
RESPONSE: ...
;
_vrf_PLAT918_cu_0315_n3_nh3_br_0m
;
PROBLEM: Reflection(s) with I(obs) much Smaller I(calc) .      4 Check
RESPONSE: ...
;
_vrf_PLAT939_cu_0315_n3_nh3_br_0m
;
PROBLEM: Large Value of Not (SHELXL) Weight Optimized S .      11.03 Check
RESPONSE: ...
;
_vrf_PLAT976_cu_0315_n3_nh3_br_0m
;
PROBLEM: Check Calcd Resid. Dens.  0.60Ang From O00M      .      -0.49 eA-3
RESPONSE: ...
;
_vrf_PLAT987_cu_0315_n3_nh3_br_0m
;
PROBLEM: The Flack x is >> 0 - Do a BASF/TWIN Refinement      Please Check
RESPONSE: ...
;
# end Validation Reply Form

```

---

It is advisable to attempt to resolve as many as possible of the alerts in all categories. Often the minor alerts point to easily fixed oversights, errors and omissions in your CIF or refinement strategy, so attention to these fine details can be worthwhile. In order to resolve some of the more serious problems it may be necessary to carry out additional measurements or structure refinements. However, the purpose of your study may justify the reported deviations and the more serious of these should normally be commented upon in the discussion or experimental section of a paper or in the "special\_details" fields of the CIF. checkCIF was carefully designed to identify outliers and unusual parameters, but every test has its limitations and alerts that are not important in a particular case may appear. Conversely, the absence of alerts does not guarantee there are no aspects of the results needing attention. It is up to the individual to critically assess their own results and, if necessary, seek expert advice.

### **Publication of your CIF in IUCr journals**

A basic structural check has been run on your CIF. These basic checks will be run on all CIFs submitted for publication in IUCr journals (*Acta Crystallographica*, *Journal of Applied Crystallography*, *Journal of Synchrotron Radiation*); however, if you intend to submit to *Acta Crystallographica Section C* or *E* or *IUCrData*, you should make sure that full publication checks are run on the final version of your CIF prior to submission.

### **Publication of your CIF in other journals**

Please refer to the *Notes for Authors* of the relevant journal for any special instructions relating to CIF submission.

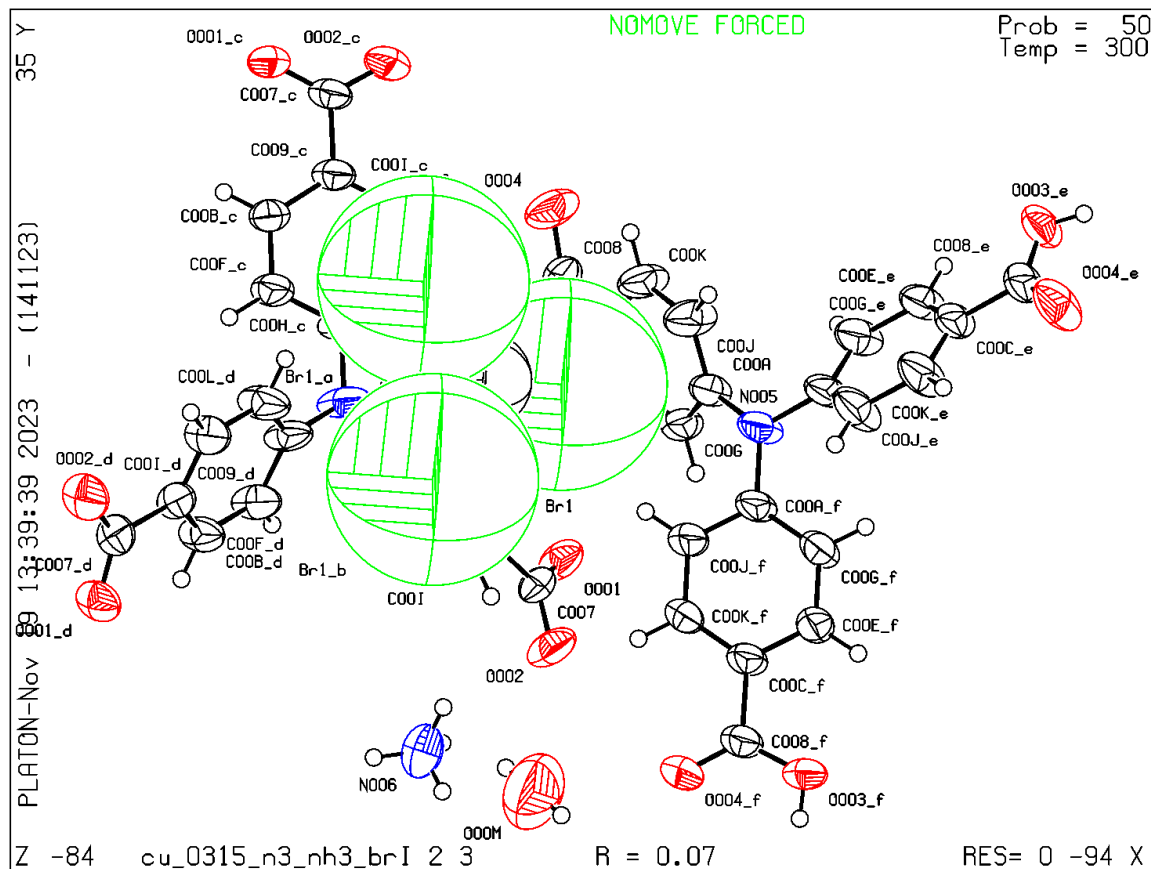

Supplement: Supplementary file 1 [file 35a31ed6925407b700e5a35d.pdf]
