# Supplementary material for: Supramolecular Polynuclear Clusters Mediated Assembly of Cubic Hydrogen-Bonded Organic Frameworks with Octahedral Cages for Reversible Photochromism
Source: Research Square preprint supplement (doi:10.21203/rs.3.rs-3670187/v1), 2023-12-07

## checkCIF/PLATON report

Structure factors have been supplied for datablock(s) cu\_tca\_br\_0m

THIS REPORT IS FOR GUIDANCE ONLY. IF USED AS PART OF A REVIEW PROCEDURE FOR PUBLICATION, IT SHOULD NOT REPLACE THE EXPERTISE OF AN EXPERIENCED CRYSTALLOGRAPHIC REFEREE.

No syntax errors found.      CIF dictionary      Interpreting this report

### Datablock: cu\_tca\_br\_0m

---

|                        |                                                               |                                                                  |              |
|------------------------|---------------------------------------------------------------|------------------------------------------------------------------|--------------|
| Bond precision:        | C-C = 0.0069 A                                                | Wavelength=1.54178                                               |              |
| Cell:                  | a=20.9699(4)                                                  | b=20.9699(4)                                                     | c=20.9699(4) |
|                        | alpha=90                                                      | beta=90                                                          | gamma=90     |
| Temperature:           | 298 K                                                         |                                                                  |              |
|                        | Calculated                                                    | Reported                                                         |              |
| Volume                 | 9221.2(5)                                                     | 9221.2(5)                                                        |              |
| Space group            | I 2 3                                                         | I 2 3                                                            |              |
| Hall group             | I 2 2 3                                                       | I 2 2 3                                                          |              |
| Moiety formula         | 2(C21 H15 N O6), 2(C21 H12 N O6), 2(C H Cl3), 3(H O), 6(H4 N) | 2(C H Cl3), 2(C21 H15 N O6), 2(C21 H12 N O6), 6(H4 N), 1.5(H2 O) |              |
| Sum formula            | C86 H83 Cl6 N10 O27                                           | C86 H83 Cl6 N10 O27                                              |              |
| Mr                     | 1901.32                                                       | 1901.32                                                          |              |
| Dx, g cm <sup>-3</sup> | 1.370                                                         | 1.370                                                            |              |
| Z                      | 4                                                             | 4                                                                |              |
| Mu (mm <sup>-1</sup> ) | 2.393                                                         | 2.393                                                            |              |
| F000                   | 3948.0                                                        | 3948.0                                                           |              |
| F000'                  | 3969.03                                                       |                                                                  |              |
| h, k, lmax             |                                                               | 24, 24, 24                                                       |              |
| Nref                   |                                                               | 2462                                                             |              |
| Tmin, Tmax             | 0.488, 0.512                                                  | 0.580, 0.752                                                     |              |
| Tmin'                  | 0.443                                                         |                                                                  |              |

Correction method= # Reported T Limits: Tmin=0.580 Tmax=0.752

AbsCorr = NONE

Data completeness=

Theta(max) = 62.482

R(reflections)= 0.0522( 2171)

wR2(reflections)=  
0.1579( 2462)

S = 1.103

Npar= 203

The following ALERTS were generated. Each ALERT has the format

**test-name\_ALERT\_alert-type\_alert-level.**

Click on the hyperlinks for more details of the test.

### Alert level C

STRVA01\_ALERT\_4\_C Flack test results are ambiguous.  
From the CIF: `_refine_ls_abs_structure_Flack` 0.500  
From the CIF: `_refine_ls_abs_structure_Flack_su` 24.000  
THETM01\_ALERT\_3\_C The value of  $\sin(\theta_{\max})/\lambda$  is less than 0.590  
Calculated  $\sin(\theta_{\max})/\lambda = 0.5752$   
PLAT042\_ALERT\_1\_C Calc. and Reported MoietyFormula Strings Differ Please Check  
Calc.: 2(C21 H15 N O6), 2(C21 H12 N O6), 2(C H Cl3), 3(H O), 6(H4 N  
Rep.: 2(C H Cl3), 2(C21 H15 N O6), 2(C21 H12 N O6), 6(H4 N), 1.5(H  
PLAT089\_ALERT\_3\_C Poor Data / Parameter Ratio (Zmax < 18) ..... 6.63 Note  
PLAT250\_ALERT\_2\_C Large U3/U1 Ratio for Average U(i,j) Tensor .... 3.2 Note  
PLAT250\_ALERT\_2\_C Large U3/U1 Ratio for Average U(i,j) Tensor .... 3.4 Note  
PLAT260\_ALERT\_2\_C Large Average Ueq of Residue Including C101 0.187 Check  
PLAT260\_ALERT\_2\_C Large Average Ueq of Residue Including O00N 0.177 Check  
PLAT340\_ALERT\_3\_C Low Bond Precision on C-C Bonds ..... 0.00686 Ang.  
PLAT420\_ALERT\_2\_C D-H Bond Without Acceptor N006 --H00A . Please Check  
PLAT906\_ALERT\_3\_C Large K Value in the Analysis of Variance ..... 3.197 Check  
PLAT976\_ALERT\_2\_C Check Calcd Resid. Dens. 0.73Ang From O00N . -0.55 eA-3  
PLAT987\_ALERT\_1\_C The Flack x is >> 0 - Do a BASF/TWIN Refinement Please Check

### Alert level G

PLAT002\_ALERT\_2\_G Number of Distance or Angle Restraints on AtSite 2 Note  
PLAT007\_ALERT\_5\_G Number of Unrefined Donor-H Atoms ..... 5 Report  
H002 H00N H00A H00B H00C  
PLAT033\_ALERT\_4\_G Flack x Value Deviates > 3.0 \* sigma from Zero . 0.500 Note  
PLAT072\_ALERT\_2\_G SHELXL First Parameter in WGHT Unusually Large 0.11 Report  
PLAT172\_ALERT\_4\_G The CIF-Embedded .res File Contains DFIX Records 1 Report  
PLAT300\_ALERT\_4\_G Atom Site Occupancy of H00N Constrained at 0.5 Check  
PLAT417\_ALERT\_2\_G Short Inter D-H..H-D H00C ..H00N . 1.62 Ang.  
 $1/2+y, 1/2-z, 3/2-x = 23\_556$  Check  
PLAT720\_ALERT\_4\_G Number of Unusual/Non-Standard Labels ..... 37 Note  
C101 O002 H002 O003 O004 O005 N006 H00A  
H00B H00C C007 N008 C009 C00A N00B C00C  
C00D H00D C00E H00E C00F C00G C00H H00H  
C00I H00I C00J H00J C00K H00K C00L H00L  
C00M H00M O00N H00N H00F  
PLAT790\_ALERT\_4\_G Centre of Gravity not Within Unit Cell: Resd. # 2 Note  
C21 H12 N O6  
PLAT860\_ALERT\_3\_G Number of Least-Squares Restraints ..... 1 Note  
PLAT909\_ALERT\_3\_G Percentage of I>2sig(I) Data at Theta(Max) Still 86% Note  
PLAT910\_ALERT\_3\_G Missing # of FCF Reflection(s) Below Theta(Min). 1 Note  
0 1 1,  
PLAT916\_ALERT\_2\_G Hooft y and Flack x Parameter Values Differ by . 0.34 Check  
PLAT978\_ALERT\_2\_G Number C-C Bonds with Positive Residual Density. 0 Info

---

```

0 ALERT level A = Most likely a serious problem - resolve or explain
0 ALERT level B = A potentially serious problem, consider carefully
13 ALERT level C = Check. Ensure it is not caused by an omission or oversight
14 ALERT level G = General information/check it is not something unexpected

2 ALERT type 1 CIF construction/syntax error, inconsistent or missing data
11 ALERT type 2 Indicator that the structure model may be wrong or deficient
7 ALERT type 3 Indicator that the structure quality may be low
6 ALERT type 4 Improvement, methodology, query or suggestion
1 ALERT type 5 Informative message, check

```

---

## Validation response form

Please find below a validation response form (VRF) that can be filled in and pasted into your CIF.

```

# start Validation Reply Form
_vrf_STRVA01_cu_tca_br_0m
;
PROBLEM: Flack test results are ambiguous.
RESPONSE: ...
;
_vrf_THETM01_cu_tca_br_0m
;
PROBLEM: The value of sine(theta_max)/wavelength is less than 0.590
RESPONSE: ...
;
_vrf_PLAT042_cu_tca_br_0m
;
PROBLEM: Calc. and Reported MoietyFormula Strings Differ      Please Check
RESPONSE: ...
;
_vrf_PLAT089_cu_tca_br_0m
;
PROBLEM: Poor Data / Parameter Ratio (Zmax < 18) .....      6.63 Note
RESPONSE: ...
;
_vrf_PLAT250_cu_tca_br_0m
;
PROBLEM: Large U3/U1 Ratio for Average U(i,j) Tensor ....      3.2 Note
RESPONSE: ...
;
_vrf_PLAT260_cu_tca_br_0m
;
PROBLEM: Large Average Ueq of Residue Including      C101      0.187 Check
RESPONSE: ...
;
_vrf_PLAT340_cu_tca_br_0m
;
PROBLEM: Low Bond Precision on C-C Bonds .....      0.00686 Ang.
RESPONSE: ...
;
_vrf_PLAT420_cu_tca_br_0m
;
PROBLEM: D-H Bond Without Acceptor N006      --H00A      .      Please Check
RESPONSE: ...

```

```

;
_vrf_PLAT906_cu_tca_br_0m
;
PROBLEM: Large K Value in the Analysis of Variance ..... 3.197 Check
RESPONSE: ...
;
_vrf_PLAT976_cu_tca_br_0m
;
PROBLEM: Check Calcd Resid. Dens. 0.73Ang From O00N . -0.55 eA-3
RESPONSE: ...
;
_vrf_PLAT987_cu_tca_br_0m
;
PROBLEM: The Flack x is >> 0 - Do a BASF/TWIN Refinement Please Check
RESPONSE: ...
;
# end Validation Reply Form

```

---

It is advisable to attempt to resolve as many as possible of the alerts in all categories. Often the minor alerts point to easily fixed oversights, errors and omissions in your CIF or refinement strategy, so attention to these fine details can be worthwhile. In order to resolve some of the more serious problems it may be necessary to carry out additional measurements or structure refinements. However, the purpose of your study may justify the reported deviations and the more serious of these should normally be commented upon in the discussion or experimental section of a paper or in the "special\_details" fields of the CIF. checkCIF was carefully designed to identify outliers and unusual parameters, but every test has its limitations and alerts that are not important in a particular case may appear. Conversely, the absence of alerts does not guarantee there are no aspects of the results needing attention. It is up to the individual to critically assess their own results and, if necessary, seek expert advice.

### **Publication of your CIF in IUCr journals**

A basic structural check has been run on your CIF. These basic checks will be run on all CIFs submitted for publication in IUCr journals (*Acta Crystallographica*, *Journal of Applied Crystallography*, *Journal of Synchrotron Radiation*); however, if you intend to submit to *Acta Crystallographica Section C* or *E* or *IUCrData*, you should make sure that full publication checks are run on the final version of your CIF prior to submission.

### **Publication of your CIF in other journals**

Please refer to the *Notes for Authors* of the relevant journal for any special instructions relating to CIF submission.

---

**PLATON version of 14/11/2023; check.def file version of 14/09/2023**

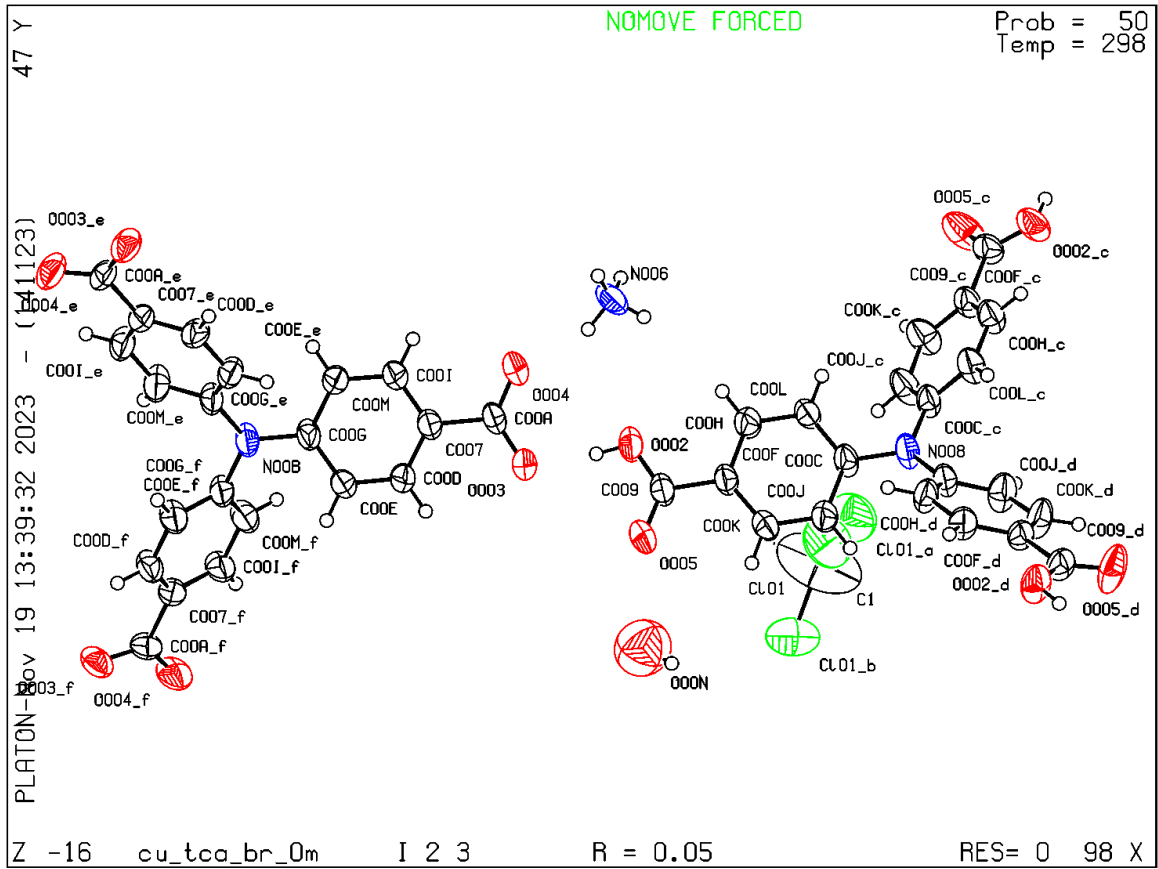

Supplement: Supplementary file 3 [file a81d2880bf5c242cea1d4d22.pdf]
