# Supplementary material for: Supramolecular Polynuclear Clusters Mediated Assembly of Cubic Hydrogen-Bonded Organic Frameworks with Octahedral Cages for Reversible Photochromism
Source: Research Square preprint supplement (doi:10.21203/rs.3.rs-3670187/v1), 2023-12-07

## checkCIF/PLATON report

Structure factors have been supplied for datablock(s) cu\_tca\_i2\_0m

THIS REPORT IS FOR GUIDANCE ONLY. IF USED AS PART OF A REVIEW PROCEDURE FOR PUBLICATION, IT SHOULD NOT REPLACE THE EXPERTISE OF AN EXPERIENCED CRYSTALLOGRAPHIC REFEREE.

No syntax errors found.      CIF dictionary      Interpreting this report

### Datablock: cu\_tca\_i2\_0m

---

Bond precision:      C-C = 0.0089 Å      Wavelength=1.54178

Cell:                      a=20.9574 (1)              b=20.9574 (1)              c=20.9574 (1)  
                                alpha=90              beta=90              gamma=90

Temperature:              301 K

|                        | Calculated                                                        | Reported                                                              |
|------------------------|-------------------------------------------------------------------|-----------------------------------------------------------------------|
| Volume                 | 9204.75 (13)                                                      | 9204.75 (13)                                                          |
| Space group            | I 2 3                                                             | I 2 3                                                                 |
| Hall group             | I 2 2 3                                                           | I 2 2 3                                                               |
| Moiety formula         | 2 (C21 H12 N O6), 2 (C21 H15 N O6), 2 (C H I3), 3 (H O), 6 (H4 N) | 2 (C21 H12 N O6), 2 (C21 H15 N O6), 6 (H4 N), 1.5 (H2 O2), 2 (C H I3) |
| Sum formula            | C86 H83 I6 N10 O27                                                | C86 H83 I6 N10 O27                                                    |
| Mr                     | 2450.02                                                           | 2450.02                                                               |
| Dx, g cm <sup>-3</sup> | 1.768                                                             | 1.768                                                                 |
| Z                      | 4                                                                 | 4                                                                     |
| Mu (mm <sup>-1</sup> ) | 16.597                                                            | 16.597                                                                |
| F000                   | 4812.0                                                            | 4812.0                                                                |
| F000'                  | 4819.46                                                           |                                                                       |
| h, k, lmax             |                                                                   | 23, 24, 23                                                            |
| Nref                   |                                                                   | 2458                                                                  |
| Tmin, Tmax             | 0.117, 0.136                                                      | 0.559, 0.752                                                          |
| Tmin'                  | 0.012                                                             |                                                                       |

Correction method= # Reported T Limits: Tmin=0.559 Tmax=0.752

AbsCorr = CYLINDER

Data completeness=

Theta (max)= 62.548

```
wR2 (reflections)=  
0.2104 ( 2458)
```

Npar= 190

```
test-name ALERT alert-type alert-level.
```

Click on the hyperlinks for more details of the test.

```

STRVA01_ALERT_4_C          Flack test results are ambiguous.
      From the CIF: _refine_ls_abs_structure_Flack      0.500
      From the CIF: _refine_ls_abs_structure_Flack_su    20.000
THETM01_ALERT_3_C The value of sine(theta_max)/wavelength is less than 0.590
      Calculated sin(theta_max)/wavelength =      0.5756
PLAT042_ALERT_1_C Calc. and Reported MoietyFormula Strings Differ      Please Check
      Calc: 2(C21 H12 N O6), 2(C21 H15 N O6), 2(C H I3), 3(H O), 6(H4 N)
      Rep.: 2(C21 H12 N O6), 2(C21 H15 N O6), 6(H4 N), 1.5(H2 O2), 2(C H
PLAT090_ALERT_3_C Poor Data / Parameter Ratio (Zmax > 18) .....      7.07 Note
PLAT202_ALERT_3_C Isotropic non-H Atoms in Anion/Solvent .....      2 Check
      I1      C4
PLAT250_ALERT_2_C Large U3/U1 Ratio for Average U(i,j) Tensor ....      3.5 Note
PLAT250_ALERT_2_C Large U3/U1 Ratio for Average U(i,j) Tensor ....      3.8 Note
PLAT260_ALERT_2_C Large Average Ueq of Residue Including      O00M      0.200 Check
PLAT342_ALERT_3_C Low Bond Precision on C-C Bonds .....      0.00893 Ang.
PLAT790_ALERT_4_C Centre of Gravity not Within Unit Cell: Resd. #      1 Note
      C21 H12 N O6
PLAT918_ALERT_3_C Reflection(s) with I(obs) much Smaller I(calc) .      3 Check
PLAT934_ALERT_3_C Number of (Iobs-Icalc)/Sigma(W) > 10 Outliers ..      1 Check
      0 0 4,
PLAT987_ALERT_1_C The Flack x is >> 0 - Do a BASF/TWIN Refinement      Please Check

```

|                   |                                                  |       |        |
|-------------------|--------------------------------------------------|-------|--------|
| PLAT002_ALERT_2_G | Number of Distance or Angle Restraints on AtSite | 3     | Note   |
| PLAT007_ALERT_5_G | Number of Unrefined Donor-H Atoms .....          | 6     | Report |
|                   | H003 H00M H00B H00C H00G H00H                    |       |        |
| PLAT033_ALERT_4_G | Flack x Value Deviates > 3.0 * sigma from Zero . | 0.500 | Note   |
| PLAT072_ALERT_2_G | SHELXL First Parameter in WGHT Unusually Large   | 0.15  | Report |
| PLAT172_ALERT_4_G | The CIF-Embedded .res File Contains DFIX Records | 2     | Report |
| PLAT177_ALERT_4_G | The CIF-Embedded .res File Contains DELU Records | 1     | Report |
| PLAT300_ALERT_4_G | Atom Site Occupancy of H00M Constrained at       | 0.5   | Check  |
| PLAT432_ALERT_2_G | Short Inter X...Y Contact I1 ..C00J              | 3.48  | Ang.   |
|                   | 1/2+y,-1/2+z,-1/2+x = 21_544                     |       | Check  |
| PLAT720_ALERT_4_G | Number of Unusual/Non-Standard Labels .....      | 36    | Note   |
|                   | O001 O002 O003 H003 O004 N005 N006 H00B          |       |        |
|                   | H00C H00G H00H C007 C008 C009 C00A H00A          |       |        |
|                   | C00B C00C C00D H00D C00E H00E C00F H00F          |       |        |
|                   | N00G C00H C00I H00I C00J H00J C00K H00K          |       |        |
|                   | C00L H00L O00M H00M                              |       |        |
| PLAT860_ALERT_3_G | Number of Least-Squares Restraints .....         | 2     | Note   |
| PLAT909_ALERT_3_G | Percentage of I>2sig(I) Data at Theta(Max) Still | 69%   | Note   |
| PLAT910_ALERT_3_G | Missing # of FCF Reflection(s) Below Theta(Min). | 2     | Note   |
|                   | 0 1 1, 0 0 2,                                    |       |        |
| PLAT955_ALERT_1_G | Reported (CIF) and Actual (FCF) Lmax Differ by . | 1     | Units  |

---

```

0 ALERT level A = Most likely a serious problem - resolve or explain
0 ALERT level B = A potentially serious problem, consider carefully
13 ALERT level C = Check. Ensure it is not caused by an omission or oversight
14 ALERT level G = General information/check it is not something unexpected

3 ALERT type 1 CIF construction/syntax error, inconsistent or missing data
7 ALERT type 2 Indicator that the structure model may be wrong or deficient
9 ALERT type 3 Indicator that the structure quality may be low
7 ALERT type 4 Improvement, methodology, query or suggestion
1 ALERT type 5 Informative message, check

```

---

## Validation response form

Please find below a validation response form (VRF) that can be filled in and pasted into your CIF.

```

# start Validation Reply Form
_vrf_STRVA01_cu_tca_i2_0m
;
PROBLEM: Flack test results are ambiguous.
RESPONSE: ...
;
_vrf_THETM01_cu_tca_i2_0m
;
PROBLEM: The value of sine(theta_max)/wavelength is less than 0.590
RESPONSE: ...
;
_vrf_PLAT042_cu_tca_i2_0m
;
PROBLEM: Calc. and Reported MoietyFormula Strings Differ      Please Check
RESPONSE: ...
;
_vrf_PLAT090_cu_tca_i2_0m
;
PROBLEM: Poor Data / Parameter Ratio (Zmax > 18) .....      7.07 Note
RESPONSE: ...
;
_vrf_PLAT202_cu_tca_i2_0m
;
PROBLEM: Isotropic non-H Atoms in Anion/Solvent .....      2 Check
RESPONSE: ...
;
_vrf_PLAT250_cu_tca_i2_0m
;
PROBLEM: Large U3/U1 Ratio for Average U(i,j) Tensor ....      3.5 Note
RESPONSE: ...
;
_vrf_PLAT260_cu_tca_i2_0m
;
PROBLEM: Large Average Ueq of Residue Including      O00M      0.200 Check
RESPONSE: ...
;
_vrf_PLAT342_cu_tca_i2_0m
;

```

```

PROBLEM: Low Bond Precision on  C-C Bonds .....      0.00893 Ang.
RESPONSE: ...
;
_vrf_PLAT790_cu_tca_i2_0m
;
PROBLEM: Centre of Gravity not Within Unit Cell: Resd.  #          1 Note
RESPONSE: ...
;
_vrf_PLAT918_cu_tca_i2_0m
;
PROBLEM: Reflection(s) with I(obs) much Smaller I(calc) .          3 Check
RESPONSE: ...
;
_vrf_PLAT934_cu_tca_i2_0m
;
PROBLEM: Number of (Iobs-Icalc)/Sigma(W) > 10 Outliers ..          1 Check
RESPONSE: ...
;
_vrf_PLAT987_cu_tca_i2_0m
;
PROBLEM: The Flack x is >> 0 -  Do a BASF/TWIN Refinement      Please Check
RESPONSE: ...
;
# end Validation Reply Form

```

---

It is advisable to attempt to resolve as many as possible of the alerts in all categories. Often the minor alerts point to easily fixed oversights, errors and omissions in your CIF or refinement strategy, so attention to these fine details can be worthwhile. In order to resolve some of the more serious problems it may be necessary to carry out additional measurements or structure refinements. However, the purpose of your study may justify the reported deviations and the more serious of these should normally be commented upon in the discussion or experimental section of a paper or in the "special\_details" fields of the CIF. checkCIF was carefully designed to identify outliers and unusual parameters, but every test has its limitations and alerts that are not important in a particular case may appear. Conversely, the absence of alerts does not guarantee there are no aspects of the results needing attention. It is up to the individual to critically assess their own results and, if necessary, seek expert advice.

### Publication of your CIF in IUCr journals

A basic structural check has been run on your CIF. These basic checks will be run on all CIFs submitted for publication in IUCr journals (*Acta Crystallographica*, *Journal of Applied Crystallography*, *Journal of Synchrotron Radiation*); however, if you intend to submit to *Acta Crystallographica Section C* or *E* or *IUCrData*, you should make sure that full publication checks are run on the final version of your CIF prior to submission.

### Publication of your CIF in other journals

Please refer to the *Notes for Authors* of the relevant journal for any special instructions relating to CIF submission.

**Datablock cu\_tca\_i2\_0m - ellipsoid plot**

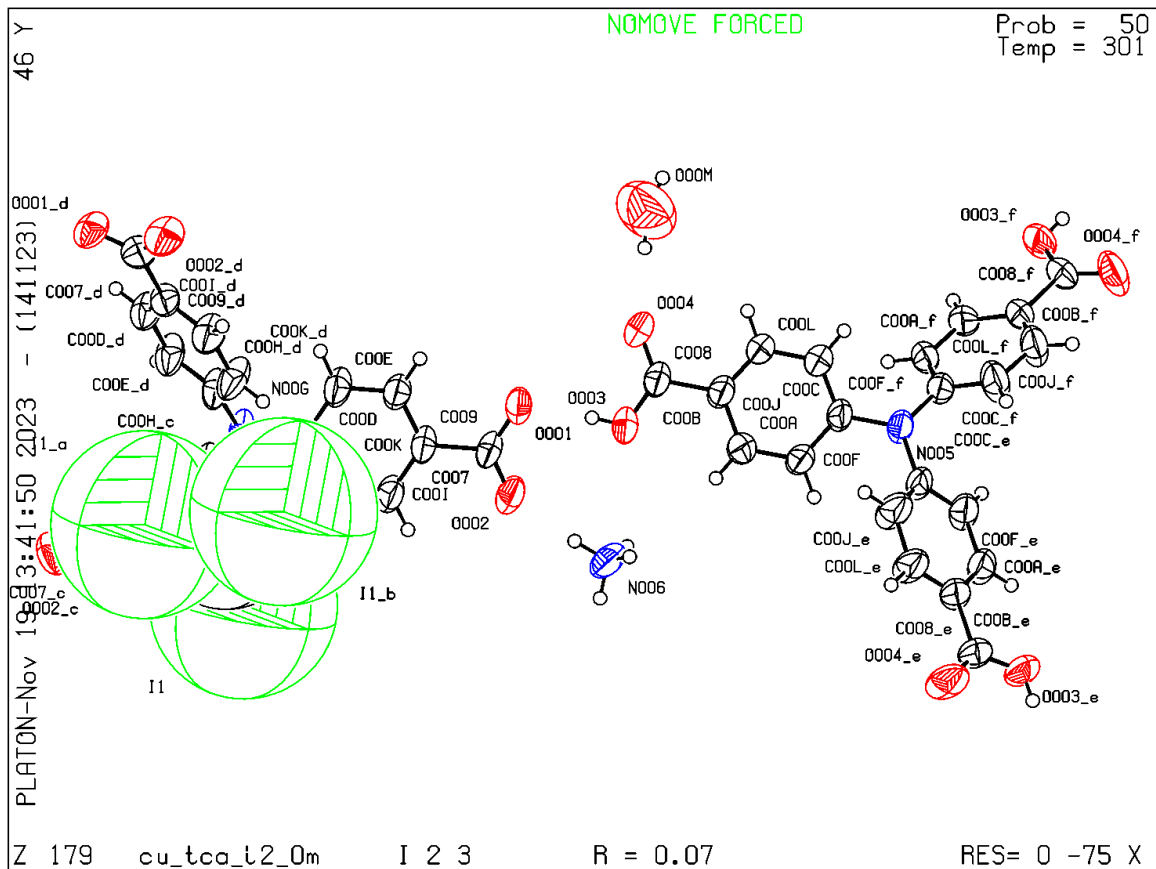

Supplement: Supplementary file 5 [file fffb87bb4cefa2a3a507175d.pdf]
