# Supplementary material for: Supramolecular Polynuclear Clusters Mediated Assembly of Cubic Hydrogen-Bonded Organic Frameworks with Octahedral Cages for Reversible Photochromism
Source: Research Square preprint supplement (doi:10.21203/rs.3.rs-3670187/v1), 2023-12-07
Supplement: Supplementary file 1 [file 7366e8c96e34ec0eec536e6f.xlsx]

## Sheet: Figure 2d
TCA_NH4@CHCl3			TCA_NH4@CHBr3			TCA_NH4@CHI3
ppm/Intensity			ppm/Intensity			ppm/Intensity
4.53463 9.20008e-05			4.54667 0.000673409			4.52431 0.00027757
4.5352 8.20965e-05			4.54724 0.000663891			4.52489 0.000270794
4.53578 7.21922e-05			4.54781 0.000650449			4.52546 0.000264019
4.53635 7.42478e-05			4.54839 0.000637008			4.52603 0.000260339
4.53692 7.63034e-05			4.54896 0.000628287			4.52661 0.000256659
4.5375 7.20801e-05			4.54953 0.000619566			4.52718 0.000258858
4.53807 6.78567e-05			4.5501 0.000611826			4.52775 0.000252237
4.53864 6.36334e-05			4.55068 0.000604086			4.52833 0.000240932
4.53922 5.941e-05			4.55125 0.000583022			4.5289 0.000244325
4.53979 5.01411e-05			4.55182 0.000577653			4.52947 0.0002389
4.54036 4.08721e-05			4.5524 0.000572283			4.53005 0.000233474
4.54093 3.87792e-05			4.55297 0.000551219			4.53062 0.000228301
4.54151 3.66862e-05			4.55354 0.000539561			4.53119 0.000223127
4.54208 3.68357e-05			4.55412 0.000527902			4.53176 0.000217954
4.54265 3.69852e-05			4.55469 0.000506435			4.53234 0.000212781
4.54323 2.51747e-05			4.55526 0.000500662			4.53291 0.000207148
4.5438 1.33643e-05			4.55584 0.000488758			4.53348 0.000201516
4.54437 1.72046e-05			4.55641 0.000476854			4.53406 0.000195883
4.54495 2.10448e-05			4.55698 0.000467239			4.53463 0.000190251
4.54552 3.35721e-06			4.55756 0.00044193			4.5352 0.000186346
4.54609 1.43734e-05			4.55813 0.000437832			4.53578 0.000182442
4.54667 1.32029e-06			4.5587 0.000418041			4.53635 0.000171189
4.54724 1.6971e-05			4.55927 0.000414924			4.53692 0.000159935
4.54781 4.51583e-06			4.55985 0.000396113			4.5375 0.000157133
4.54839 -7.93931e-06			4.56042 0.000382534			4.53807 0.000154331
4.54896 1.32029e-06			4.56099 0.000368954			4.53864 0.00014712
4.54953 -1.81239e-05			4.56157 0.000358318			4.53922 0.000139908
4.5501 -1.96283e-05			4.56214 0.000347681			4.53979 0.000133478
4.55068 -2.11326e-05			4.56271 0.000334566			4.54036 0.000127047
4.55125 -3.81848e-05			4.56329 0.000321452			4.54093 0.000120616
4.55182 -2.65333e-05			4.56386 0.000298528			4.54151 0.000114186
4.5524 -3.10276e-05			4.56443 0.000291299			4.54208 0.000106836
4.55297 -3.55219e-05			4.56501 0.00028456			4.54265 9.9487e-05
4.55354 -3.54565e-05			4.56558 0.000262127			4.54323 9.21378e-05
4.55412 -3.53911e-05			4.56615 0.000248522			4.5438 8.47885e-05
4.55469 -4.25016e-05			4.56672 0.000234917			4.54437 8.29569e-05
4.55526 -4.96122e-05			4.5673 0.000226769			4.54495 8.11253e-05
4.55584 -5.53772e-05			4.56787 0.000202925			4.54552 6.90047e-05
4.55641 -6.11423e-05			4.56844 0.000191834			4.54609 5.68841e-05
4.55698 -6.69074e-05			4.56902 0.000180743			4.54667 4.91731e-05
4.55756 -5.83205e-05			4.56959 0.000167281			4.54724 4.14621e-05
4.55813 -6.89443e-05			4.57016 0.000153819			4.54781 3.81607e-05
4.5587 -6.52162e-05			4.57074 0.00014428			4.54839 3.48592e-05
4.55927 -7.58399e-05			4.57131 0.000119048			4.54896 2.53798e-05
4.55985 -5.77599e-05			4.57188 0.000118251			4.54953 1.59004e-05
4.56042 -8.18386e-05			4.57246 0.000101759			4.5501 6.42094e-06
4.56099 -7.72135e-05			4.57303 8.65754e-05			4.55068 -3.0585e-06
4.56157 -7.40833e-05			4.5736 7.13917e-05			4.55125 -1.14355e-05
4.56214 -7.09532e-05			4.57418 5.9396e-05			4.55182 -1.98126e-05
4.56271 -7.51111e-05			4.57475 4.74004e-05			4.5524 -2.378e-05
4.56329 -6.49172e-05			4.57532 3.63856e-05			4.55297 -2.77475e-05
4.56386 -7.9839e-05			4.57589 2.53708e-05			4.55354 -3.76691e-05
4.56443 -8.0409e-05			4.57647 1.00237e-05			4.55412 -4.75906e-05
4.56501 -6.67765e-05			4.57704 1.03711e-05			4.55469 -5.75121e-05
4.56558 -8.18479e-05			4.57761 -1.5766e-05			4.55526 -6.74337e-05
4.56615 -7.80824e-05			4.57819 -1.57456e-05			4.55584 -7.65284e-05
4.56672 -7.43169e-05			4.57876 -3.58338e-05			4.55641 -8.56232e-05
4.5673 -9.0958e-05			4.57933 -4.02274e-05			4.55698 -9.06758e-05
4.56787 -7.88953e-05			4.57991 -5.5738e-05			4.55756 -0.000104548
4.56844 -8.38755e-05			4.58048 -7.12486e-05			4.55813 -0.000104571
4.56902 -7.45038e-05			4.58105 -7.9147e-05			4.5587 -0.000119292
4.56959 -7.54475e-05			4.58163 -8.70453e-05			4.55927 -0.000120417
4.57016 -7.63912e-05			4.5822 -9.59246e-05			4.55985 -0.000130362
4.57074 -7.64379e-05			4.58277 -0.000104804			4.56042 -0.000145818
4.57131 -7.64846e-05			4.58335 -0.000108288			4.56099 -0.000146576
4.57188 -7.62324e-05			4.58392 -0.000127467			4.56157 -0.000161114
4.57246 -7.59801e-05			4.58449 -0.000133894			4.56214 -0.000166833
4.57303 -7.57278e-05			4.58506 -0.000140321			4.56271 -0.000177076
4.5736 -7.54755e-05			4.58564 -0.000145951			4.56329 -0.000187319
4.57418 -6.41603e-05			4.58621 -0.000151581			4.56386 -0.000192601
4.57475 -5.28451e-05			4.58678 -0.000157211			4.56443 -0.000206703
4.57532 -5.34898e-05			4.58736 -0.000162841			4.56501 -0.000208953
4.57589 -5.41345e-05			4.58793 -0.000168226			4.56558 -0.000220023
4.57647 -6.11703e-05			4.5885 -0.00017361			4.56615 -0.000227051
4.57704 -6.82061e-05			4.58908 -0.000175072			4.56672 -0.000242898
4.57761 -3.72692e-05			4.58965 -0.000176533			4.5673 -0.000240969
4.57819 -5.41719e-05			4.59022 -0.000181426			4.56787 -0.000253738
4.57876 -3.89323e-05			4.5908 -0.000186319			4.56844 -0.000258791
4.57933 -3.80447e-05			4.59137 -0.000187288			4.56902 -0.000263843
4.57991 -1.41342e-05			4.59194 -0.000188258			4.56959 -0.000272387
4.58048 -1.89275e-05			4.59252 -0.000191761			4.57016 -0.000280931
4.58105 -2.85422e-05			4.59309 -0.000195265			4.57074 -0.000289474
4.58163 -9.45299e-06			4.59366 -0.000199749			4.57131 -0.000298018
4.5822 -1.12776e-06			4.59423 -0.000204233			4.57188 -0.000308255
4.58277 7.19747e-06			4.59481 -0.000189385			4.57246 -0.000318492
4.58335 1.47752e-05			4.59538 -0.000190232			4.57303 -0.00032432
4.58392 2.23529e-05			4.59595 -0.000191406			4.5736 -0.000330148
4.58449 2.27547e-05			4.59653 -0.00019258			4.57418 -0.000334322
4.58506 2.31565e-05			4.5971 -0.000185988			4.57475 -0.000338496
4.58564 3.83587e-05			4.59767 -0.000179396			4.57532 -0.00035002
4.58621 5.35609e-05			4.59825 -0.000172805			4.57589 -0.000361543
4.58678 5.68031e-05			4.59882 -0.000166213			4.57647 -0.000367945
4.58736 6.00454e-05			4.59939 -0.000159682			4.57704 -0.000374347
4.58793 7.00151e-05			4.59997 -0.000153152			4.57761 -0.000380749
4.5885 7.99848e-05			4.60054 -0.000147602			4.57819 -0.000387151
4.58908 8.99546e-05			4.60111 -0.000142053			4.57876 -0.00039291
4.58965 9.99243e-05			4.60168 -0.000122362			4.57933 -0.000398668
4.59022 0.000103148			4.60226 -0.000118365			4.57991 -0.000404427
4.5908 0.000106371			4.60283 -0.000105541			4.58048 -0.000410186
4.59137 0.000116771			4.6034 -9.27162e-05			4.58105 -0.000417116
4.59194 0.00012717			4.60398 -8.36518e-05			4.58163 -0.000424046
4.59252 0.000123667			4.60455 -7.45873e-05			4.5822 -0.000430977
4.59309 0.000120163			4.60512 -5.89834e-05			4.58277 -0.000437907
4.59366 0.000138187			4.6057 -4.33796e-05			4.58335 -0.000439049
4.59423 0.000156211			4.60627 -2.78575e-05			4.58392 -0.000440192
4.59481 0.000160481			4.60684 -1.23354e-05			4.58449 -0.000445744
4.59538 0.000164751			4.60742 3.1867e-06			4.58506 -0.000451296
4.59595 0.000176197			4.60799 1.87088e-05			4.58564 -0.000454345
4.59653 0.000187643			4.60856 3.45362e-05			4.58621 -0.000457394
4.5971 0.00018967			4.60914 5.03635e-05			4.58678 -0.000460443
4.59767 0.000191698			4.60971 6.61909e-05			4.58736 -0.000463491
4.59825 0.000205686			4.61028 8.20182e-05			4.58793 -0.000466816
4.59882 0.000219673			4.61085 9.78456e-05			4.5885 -0.00047014
4.59939 0.000221869			4.61143 0.000113673			4.58908 -0.000473465
4.59997 0.000224065			4.612 0.000138328			4.58965 -0.000476789
4.60054 0.000242406			4.61257 0.000147289			4.59022 -0.000477323
4.60111 0.000232044			4.61315 0.000166877			4.5908 -0.000477857
4.60168 0.000245303			4.61372 0.000186465			4.59137 -0.000478391
4.60226 0.000258561			4.61429 0.000205071			4.59194 -0.000478925
4.60283 0.000274212			4.61487 0.000223678			4.59252 -0.000479643
4.6034 0.000261159			4.61544 0.000245472			4.59309 -0.00048036
4.60398 0.000272885			4.61601 0.000267267			4.59366 -0.000476669
4.60455 0.000284612			4.61659 0.000285138			4.59423 -0.000472977
4.60512 0.000294544			4.61716 0.000303009			4.59481 -0.000469721
4.6057 0.000304476			4.61773 0.000322984			4.59538 -0.000466466
4.60627 0.000307532			4.61831 0.00034296			4.59595 -0.00046762
4.60684 0.000310587			4.61888 0.000362936			4.59653 -0.000468774
4.60742 0.000313643			4.61945 0.000382912			4.5971 -0.000463865
4.60799 0.000316698			4.62002 0.000397084			4.59767 -0.000458956
4.60856 0.000328564			4.6206 0.000411256			4.59825 -0.000454046
4.60914 0.000340431			4.62117 0.000429352			4.59882 -0.000449137
4.60971 0.000338543			4.62174 0.000447447			4.59939 -0.000443218
4.61028 0.000336656			4.62232 0.00046916			4.59997 -0.000437298
4.61085 0.000356297			4.62289 0.000490873			4.60054 -0.000431379
4.61143 0.000347233			4.62346 0.000506046			4.60111 -0.000425459
4.612 0.000354316			4.62404 0.00052122			4.60168 -0.00042156
4.61257 0.000361398			4.62461 0.000538927			4.60226 -0.000417662
4.61315 0.00036407			4.62518 0.000556635			4.60283 -0.000406414
4.61372 0.000366743			4.62576 0.000573361			4.6034 -0.000395166
4.61429 0.000376591			4.62633 0.000590088			4.60398 -0.000390119
4.61487 0.000386439			4.6269 0.000608785			4.60455 -0.000385072
4.61544 0.000378198			4.62748 0.000611788			4.60512 -0.000365694
4.61601 0.000369957			4.62805 0.000626561			4.6057 -0.000363955
4.61659 0.000373676			4.62862 0.000641335			4.60627 -0.000357621
4.61716 0.000377395			4.62919 0.000664855			4.60684 -0.000351288
4.61773 0.000387187			4.62977 0.000672681			4.60742 -0.000338709
4.61831 0.000396979			4.63034 0.000682795			4.60799 -0.000326129
4.61888 0.000394811			4.63091 0.000692909			4.60856 -0.00031499
4.61945 0.000392644			4.63149 0.000705496			4.60914 -0.000303851
4.62002 0.000395559			4.63206 0.000718083			4.60971 -0.000297122
4.6206 0.000398474			4.63263 0.000721515			4.61028 -0.000290393
4.62117 0.000385243			4.63321 0.000724947			4.61085 -0.000275304
4.62174 0.000400716			4.63378 0.000737861			4.61143 -0.000260215
4.62232 0.000396568			4.63435 0.000750775			4.612 -0.000259457
4.62289 0.000392419			4.63493 0.000752899			4.61257 -0.000241061
4.62346 0.000406211			4.6355 0.000755023			4.61315 -0.00023192
4.62404 0.000391298			4.63607 0.00075026			4.61372 -0.000222779
4.62461 0.000392531			4.63664 0.000761192			4.61429 -0.000212536
4.62518 0.000393765			4.63722 0.000759372			4.61487 -0.000202293
4.62576 0.000393204			4.63779 0.000757552			4.61544 -0.000189018
4.62633 0.000392644			4.63836 0.000755487			4.61601 -0.000175744
4.6269 0.000393382			4.63894 0.000753422			4.61659 -0.000163572
4.62748 0.00039412			4.63951 0.000747433			4.61716 -0.000151399
4.62805 0.000394858			4.64008 0.000741444			4.61773 -0.000131418
4.62862 0.000395596			4.64066 0.000732839			4.61831 -0.000129076
4.62919 0.000395138			4.64123 0.000724235			4.61888 -0.000117914
4.62977 0.00039468			4.6418 0.00071563			4.61945 -0.000106752
4.63034 0.000403193			4.64238 0.000707025			4.62002 -8.29131e-05
4.63091 0.000383001			4.64295 0.000696786			4.6206 -7.67122e-05
4.63149 0.000387028			4.64352 0.000686546			4.62117 -6.79389e-05
4.63206 0.000391055			4.6441 0.000675326			4.62174 -5.91657e-05
4.63263 0.000369966			4.64467 0.000664105			4.62232 -4.49265e-05
4.63321 0.000377581			4.64524 0.000658624			4.62289 -3.06872e-05
4.63378 0.000381609			4.64581 0.000637447			4.62346 -2.08576e-05
4.63435 0.000385636			4.64639 0.000629023			4.62404 -1.10279e-05
4.63493 0.000374713			4.64696 0.000620598			4.62461 -1.29007e-06
4.6355 0.00036379			4.64753 0.000611356			4.62518 8.44774e-06
4.63607 0.000365668			4.64811 0.000602114			4.62576 1.81855e-05
4.63664 0.000367546			4.64868 0.000582082			4.62633 2.79233e-05
4.63722 0.000362248			4.64925 0.000588208			4.6269 4.02793e-05
4.63779 0.000356951			4.64983 0.000578639			4.62748 5.26353e-05
4.63836 0.000349261			4.6504 0.00056907			4.62805 6.05818e-05
4.63894 0.000341571			4.65097 0.000561136			4.62862 6.85282e-05
4.63951 0.000333881			4.65155 0.000553201			4.62919 7.8955e-05
4.64008 0.000326191			4.65212 0.000546493			4.62977 8.93818e-05
4.64066 0.000321977			4.65269 0.000539785			4.63034 9.98086e-05
4.64123 0.000317763			4.65327 0.000532097			4.63091 0.000110235
4.6418 0.000329695			4.65384 0.000524408			4.63149 0.000118457
4.64238 0.000312923			4.65441 0.000531984			4.63206 0.000126679
4.64295 0.000307364			4.65498 0.000523866			4.63263 0.000136004
4.64352 0.000301804			4.65556 0.000524576			4.63321 0.000145328
4.6441 0.000296245			4.65613 0.000525286			4.63378 0.000148865
4.64467 0.000290685			4.6567 0.000527958			4.63435 0.00017004
4.64524 0.000269933			4.65728 0.00053063			4.63493 0.000173945
4.64581 0.000277884			4.65785 0.000534283			4.6355 0.000177849
4.64639 0.000276866			4.65842 0.000537936			4.63607 0.000187081
4.64696 0.000275847			4.659 0.000534886			4.63664 0.000196314
4.64753 0.000260028			4.65957 0.000547531			4.63722 0.000205546
4.64811 0.00024421			4.66014 0.000551347			4.63779 0.000214779
4.64868 0.000238557			4.66072 0.000555163			4.63836 0.000222725
4.64925 0.000232904			4.66129 0.000562495			4.63894 0.000230672
4.64983 0.000242089			4.66186 0.000569826			4.63951 0.000238618
4.6504 0.00022257			4.66244 0.000577157			4.64008 0.000246565
4.65097 0.000228166			4.66301 0.000584488			4.64066 0.000250262
4.65155 0.00020506			4.66358 0.000591447			4.64123 0.00025396
4.65212 0.000206919			4.66415 0.000598405			4.6418 0.000262067
4.65269 0.000208778			4.66473 0.000608306			4.64238 0.000270174
4.65327 0.000201668			4.6653 0.000618207			4.64295 0.000275801
4.65384 0.000194557			4.66587 0.000638735			4.64352 0.000281428
4.65441 0.000191109			4.66645 0.000643568			4.6441 0.000287055
4.65498 0.000187662			4.66702 0.000657229			4.64467 0.000292681
4.65556 0.000184214			4.66759 0.00067089			4.64524 0.000295214
4.65613 0.000180766			4.66817 0.000682385			4.64581 0.000297746
4.6567 0.00017687			4.66874 0.00069388			4.64639 0.000300278
4.65728 0.000172973			4.66931 0.000701451			4.64696 0.00030281
4.65785 0.000169077			4.66989 0.000709023			4.64753 0.000307822
4.65842 0.000165181			4.67046 0.000722234			4.64811 0.000312835
4.659 0.000159677			4.67103 0.000735446			4.64868 0.000313437
4.65957 0.000154174			4.6716 0.000744734			4.64925 0.00031404
4.66014 0.00014867			4.67218 0.000754022			4.64983 0.000317284
4.66072 0.000143167			4.67275 0.000761961			4.6504 0.000320528
4.66129 0.00014469			4.67332 0.0007699			4.65097 0.000323772
4.66186 0.000146213			4.6739 0.000781763			4.65155 0.000327016
4.66244 0.00014056			4.67447 0.000793626			4.65212 0.000327688
4.66301 0.000134907			4.67504 0.000801157			4.65269 0.00032836
4.66358 0.000130506			4.67562 0.000808687			4.65327 0.000329032
4.66415 0.000126105			4.67619 0.000816218			4.65384 0.000329704
4.66473 0.000136056			4.67676 0.000823748			4.65441 0.0003284
4.6653 0.000117304			4.67734 0.000831892			4.65498 0.000327097
4.66587 0.000136972			4.67791 0.000840035			4.65556 0.000331305
4.66645 0.000127937			4.67848 0.000844255			4.65613 0.000335514
4.66702 0.000133253			4.67906 0.000848475			4.6567 0.000327321
4.66759 0.00013857			4.67963 0.000859561			4.65728 0.000336766
4.66817 0.000139551			4.6802 0.000870648			4.65785 0.000336289
4.66874 0.000140532			4.68077 0.000875195			4.65842 0.000335813
4.66931 0.000114603			4.68135 0.000879742			4.659 0.000335267
4.66989 0.000136514			4.68192 0.000880973			4.65957 0.000334722
4.67046 0.000136897			4.68249 0.000882204			4.66014 0.000334176
4.67103 0.00013728			4.68307 0.000892264			4.66072 0.000333631
4.6716 0.000131683			4.68364 0.000886628			4.66129 0.00033281
4.67218 0.00015479			4.68421 0.000890394			4.66186 0.000331989
4.67275 0.000145521			4.68479 0.000894159			4.66244 0.000331168
4.67332 0.000136253			4.68536 0.00089302			4.66301 0.000330347
4.6739 0.000147315			4.68593 0.00089188			4.66358 0.000327774
4.67447 0.000158378			4.68651 0.000892253			4.66415 0.000325202
4.67504 0.000142831			4.68708 0.000892626			4.66473 0.00031822
4.67562 0.000155986			4.68765 0.000890056			4.6653 0.000311238
4.67619 0.000153594			4.68823 0.000887487			4.66587 0.00030591
4.67676 0.000179906			4.6888 0.000869876			4.66645 0.000300582
4.67734 0.000176393			4.68937 0.000867961			4.66702 0.000305175
4.67791 0.00017288			4.68994 0.000858197			4.66759 0.00029213
4.67848 0.000183121			4.69052 0.000848434			4.66817 0.000284827
4.67906 0.000193361			4.69109 0.000830497			4.66874 0.000277524
4.67963 0.000191193			4.69166 0.000828254			4.66931 0.000273527
4.6802 0.000189026			4.69224 0.000817183			4.66989 0.000269531
4.68077 0.000198818			4.69281 0.000806112			4.67046 0.000257359
4.68135 0.00020861			4.69338 0.000789401			4.67103 0.000245187
4.68192 0.000216001			4.69396 0.00077269			4.6716 0.000240364
4.68249 0.000223392			4.69453 0.000755979			4.67218 0.000235541
4.68307 0.000230783			4.6951 0.000739267			4.67275 0.000220681
4.68364 0.000238174			4.69568 0.000715608			4.67332 0.000205822
4.68421 0.000239584			4.69625 0.000691949			4.6739 0.000195372
4.68479 0.000240995			4.69682 0.000681041			4.67447 0.000184923
4.68536 0.000254366			4.6974 0.000654439			4.67504 0.000169879
4.68593 0.000267737			4.69797 0.000632905			4.67562 0.000154836
4.68651 0.000275277			4.69854 0.000611371			4.67619 0.000139793
4.68708 0.000282818			4.69911 0.000580028			4.67676 0.00012475
4.68765 0.000290358			4.69969 0.00056438			4.67734 0.000107089
4.68823 0.000297898			4.70026 0.000542033			4.67791 8.94277e-05
4.6888 0.000302598			4.70083 0.000519687			4.67848 8.1688e-05
4.68937 0.000307298			4.70141 0.000493417			4.67906 5.631e-05
4.68994 0.000319174			4.70198 0.000467147			4.67963 3.7087e-05
4.69052 0.00033105			4.70255 0.000454365			4.6802 1.7864e-05
4.69109 0.000329312			4.70313 0.000425888			4.68077 -2.46137e-06
4.69166 0.000327574			4.7037 0.000410163			4.68135 -2.27867e-05
4.69224 0.000333012			4.70427 0.000394437			4.68192 -4.80729e-05
4.69281 0.00033845			4.70485 0.00037765			4.68249 -7.3359e-05
4.69338 0.0003403			4.70542 0.000360862			4.68307 -8.43141e-05
4.69396 0.00034215			4.70599 0.000350613			4.68364 -0.000112907
4.69453 0.000344			4.70656 0.000340365			4.68421 -0.000136264
4.6951 0.00034585			4.70714 0.00033355			4.68479 -0.000159621
4.69568 0.00034415			4.70771 0.000326734			4.68536 -0.000174159
4.69625 0.000342449			4.70828 0.000327439			4.68593 -0.000206335
4.69682 0.000340749			4.70886 0.000328144			4.68651 -0.000225145
4.6974 0.000339048			4.70943 0.000324108			4.68708 -0.000243954
4.69797 0.000334806			4.71 0.000335767			4.68765 -0.000263866
4.69854 0.000330564			4.71058 0.000345137			4.68823 -0.000283778
4.69911 0.000328116			4.71115 0.000354506			4.6888 -0.000301853
4.69969 0.000325668			4.71172 0.000364285			4.68937 -0.000319928
4.70026 0.00030073			4.7123 0.000374063			4.68994 -0.000338002
4.70083 0.000304495			4.71287 0.000387765			4.69052 -0.000356077
4.70141 0.000301085			4.71344 0.000401467			4.69109 -0.000366825
4.70198 0.000297674			4.71402 0.000416395			4.69166 -0.000377574
4.70255 0.000279463			4.71459 0.000431324			4.69224 -0.000398244
4.70313 0.000289956			4.71516 0.000437424			4.69281 -0.000401275
4.7037 0.000278921			4.71573 0.000459218			4.69338 -0.000412391
4.70427 0.000267886			4.71631 0.00047104			4.69396 -0.000423507
4.70485 0.000252628			4.71688 0.000482862			4.69453 -0.000426171
4.70542 0.000266074			4.71745 0.000496646			4.6951 -0.000428835
4.70599 0.000256198			4.71803 0.00051043			4.69568 -0.000430305
4.70656 0.000246321			4.7186 0.000515421			4.69625 -0.000431775
4.70714 0.000237043			4.71917 0.000536107			4.69682 -0.000435817
4.70771 0.000227765			4.71975 0.000542406			4.6974 -0.000422221
4.70828 0.000244798			4.72032 0.000548706			4.69797 -0.000421669
4.70886 0.000233128			4.72089 0.00055198			4.69854 -0.000421118
4.70943 0.000250685			4.72147 0.00057095			4.69911 -0.000407338
4.71 0.000239538			4.72204 0.000574552			4.69969 -0.000393558
4.71058 0.000235567			4.72261 0.000578153			4.70026 -0.000378739
4.71115 0.000231596			4.72319 0.000579957			4.70083 -0.000381558
4.71172 0.000236893			4.72376 0.00058176			4.70141 -0.000348366
4.7123 0.000242191			4.72433 0.00057964			4.70198 -0.000332812
4.71287 0.000264233			4.7249 0.00057752			4.70255 -0.00031441
4.71344 0.000238435			4.72548 0.000576217			4.70313 -0.000296008
4.71402 0.000223027			4.72605 0.000574914			4.7037 -0.000274299
4.71459 0.000236324			4.72662 0.000567072			4.70427 -0.00025259
4.71516 0.000242444			4.7272 0.00055923			4.70485 -0.000226517
4.71573 0.000248564			4.72777 0.000552246			4.70542 -0.000200444
4.71631 0.000251993			4.72834 0.000545262			4.70599 -0.000174372
4.71688 0.000255422			4.72892 0.000530758			4.70656 -0.000148299
4.71745 0.000258851			4.72949 0.000516254			4.70714 -0.000117449
4.71803 0.00026228			4.73006 0.00051066			4.70771 -8.65992e-05
4.7186 0.000267681			4.73064 0.000489371			4.70828 -5.13399e-05
4.71917 0.000273082			4.73121 0.00047691			4.70886 -1.60805e-05
4.71975 0.000278482			4.73178 0.00046445			4.70943 1.73415e-05
4.72032 0.000283883			4.73236 0.000451172			4.71 5.07636e-05
4.72089 0.000290779			4.73293 0.000437894			4.71058 8.41856e-05
4.72147 0.000297674			4.7335 0.000420692			4.71115 0.000117608
4.72204 0.000297394			4.73407 0.00040349			4.71172 0.000156082
4.72261 0.000297114			4.73465 0.000383591			4.7123 0.000194557
4.72319 0.000294068			4.73522 0.000363692			4.71287 0.000228622
4.72376 0.000291021			4.73579 0.000347717			4.71344 0.000262687
4.72433 0.000295151			4.73637 0.000331741			4.71402 0.000300771
4.7249 0.000299281			4.73694 0.000313916			4.71459 0.000338856
4.72548 0.000296534			4.73751 0.000296091			4.71516 0.00037253
4.72605 0.000293787			4.73809 0.00028219			4.71573 0.000406205
4.72662 0.000274894			4.73866 0.000268289			4.71631 0.000440982
4.7272 0.000284705			4.73923 0.000252752			4.71688 0.000475759
4.72777 0.000273138			4.73981 0.000237216			4.71745 0.000520458
4.72834 0.00026157			4.74038 0.000225604			4.71803 0.000547518
4.72892 0.000253591			4.74095 0.000213991			4.7186 0.000576932
4.72949 0.000245611			4.74153 0.000204136			4.71917 0.000606347
4.73006 0.000224177			4.7421 0.000194281			4.71975 0.00064458
4.73064 0.000231446			4.74267 0.000178541			4.72032 0.000665176
4.73121 0.000215394			4.74324 0.00018111			4.72089 0.000687333
4.73178 0.000199341			4.74382 0.000166759			4.72147 0.00070949
4.73236 0.000185494			4.74439 0.000160256			4.72204 0.000730544
4.73293 0.000171646			4.74496 0.000160455			4.72261 0.000751599
4.7335 0.000164975			4.74554 0.000160654			4.72319 0.000771482
4.73407 0.000158304			4.74611 0.000151658			4.72376 0.000791365
4.73465 0.00014939			4.74668 0.00015574			4.72433 0.000791038
4.73522 0.000140476			4.74726 0.000148051			4.7249 0.000808349
4.73579 0.000124386			4.74783 0.000148209			4.72548 0.000817025
4.73637 0.000108296			4.7484 0.000153027			4.72605 0.0008257
4.73694 9.96159e-05			4.74898 0.000157844			4.72662 0.000831069
4.73751 9.09356e-05			4.74955 0.000156286			4.7272 0.000836437
4.73809 8.22554e-05			4.75012 0.000167807			4.72777 0.000834387
4.73866 7.35751e-05			4.75069 0.000168701			4.72834 0.000832337
4.73923 6.44463e-05			4.75127 0.000177442			4.72892 0.000830288
4.73981 5.53175e-05			4.75184 0.000186184			4.72949 0.000828238
4.74038 4.79827e-05			4.75241 0.000187078			4.73006 0.000821411
4.74095 4.06479e-05			4.75299 0.000207099			4.73064 0.000814584
4.74153 2.6025e-05			4.75356 0.000214042			4.73121 0.000803348
4.7421 4.0106e-05			4.75413 0.000227525			4.73178 0.000792112
4.74267 4.61139e-05			4.75471 0.00023316			4.73236 0.000775685
4.74324 3.777e-05			4.75528 0.000251961			4.73293 0.000759258
4.74382 3.42101e-05			4.75585 0.000257682			4.7335 0.000742831
4.74439 3.06501e-05			4.75643 0.000273704			4.73407 0.000726404
4.74496 5.5196e-05			4.757 0.000289725			4.73465 0.00070272
4.74554 5.10381e-05			4.75757 0.000309344			4.73522 0.000679036
4.74611 4.68708e-05			4.75815 0.000321115			4.73579 0.000655352
4.74668 5.70554e-05			4.75872 0.000342204			4.73637 0.000631667
4.74726 6.45491e-05			4.75929 0.000355446			4.73694 0.000606668
4.74783 7.20427e-05			4.75986 0.000370466			4.73751 0.000581669
4.7484 7.07159e-05			4.76044 0.000393334			4.73809 0.000551709
4.74898 6.93891e-05			4.76101 0.000411297			4.73866 0.000530569
4.74955 6.08863e-05			4.76158 0.00042926			4.73923 0.000496567
4.75012 8.10874e-05			4.76216 0.000448449			4.73981 0.000462565
4.75069 6.98563e-05			4.76273 0.000467638			4.74038 0.000434442
4.75127 8.7329e-05			4.7633 0.000481595			4.74095 0.000415139
4.75184 7.25099e-05			4.76388 0.0005034			4.74153 0.000381596
4.75241 8.63946e-05			4.76445 0.000526513			4.7421 0.000348054
4.75299 0.000100728			4.76502 0.000536546			4.74267 0.000317635
4.75356 8.63572e-05			4.7656 0.000562765			4.74324 0.000301914
4.75413 0.000105175			4.76617 0.000581137			4.74382 0.000273424
4.75471 9.52898e-05			4.76674 0.000601879			4.74439 0.000253753
4.75528 0.000107035			4.76732 0.000622621			4.74496 0.000224528
4.75585 0.000104428			4.76789 0.000642219			4.74554 0.000204123
4.75643 0.00011707			4.76846 0.000653969			4.74611 0.000194281
4.757 0.00011536			4.76903 0.000678288			4.74668 0.000175621
4.75757 0.000105577			4.76961 0.000684296			4.74726 0.000158614
4.75815 0.000110146			4.77018 0.000704037			4.74783 0.000156306
4.75872 9.85694e-05			4.77075 0.000723777			4.7484 0.000152436
4.75929 0.000115696			4.77133 0.0007333			4.74898 0.000148567
4.75986 8.80858e-05			4.7719 0.000742823			4.74955 0.000160865
4.76044 8.9179e-05			4.77247 0.000759703			4.75012 0.000164345
4.76101 8.48903e-05			4.77305 0.000776583			4.75069 0.000172142
4.76158 8.06015e-05			4.77362 0.000778575			4.75127 0.000179939
4.76216 5.32899e-05			4.77419 0.000793646			4.75184 0.000190676
4.76273 5.46821e-05			4.77477 0.000788609			4.75241 0.000201413
4.7633 4.80014e-05			4.77534 0.000807114			4.75299 0.000229236
4.76388 2.69687e-05			4.77591 0.000808207			4.75356 0.000242362
4.76445 1.74195e-05			4.77649 0.000817147			4.75413 0.000264306
4.76502 7.87022e-06			4.77706 0.000822655			4.75471 0.000286251
4.7656 -2.57603e-06			4.77763 0.000836009			4.75528 0.000308649
4.76617 -1.30223e-05			4.7782 0.000838738			4.75585 0.000339866
4.76674 -1.74886e-05			4.77878 0.000841466			4.75643 0.000365571
4.76732 -2.19549e-05			4.77935 0.000845175			4.757 0.000391277
4.76789 -4.6155e-05			4.77992 0.000841037			4.75757 0.000423596
4.76846 -7.03552e-05			4.7805 0.000844746			4.75815 0.000447097
4.76903 -5.43401e-05			4.78107 0.000848455			4.75872 0.000475558
4.76961 -8.61647e-05			4.78164 0.000851673			4.75929 0.000504019
4.77018 -9.82554e-05			4.78222 0.000854892			4.75986 0.000534019
4.77075 -0.000110346			4.78279 0.000856006			4.76044 0.00056402
4.77133 -0.000122437			4.78336 0.000857119			4.76101 0.000595306
4.7719 -0.000134528			4.78394 0.000857416			4.76158 0.000626592
4.77247 -0.000130473			4.78451 0.000857712			4.76216 0.0006452
4.77305 -0.000155121			4.78508 0.000862422			4.76273 0.000684387
4.77362 -0.000152636			4.78565 0.000854054			4.7633 0.000716408
4.77419 -0.00015015			4.78623 0.000853043			4.76388 0.000748429
4.77477 -0.000149459			4.7868 0.000852031			4.76445 0.000773652
4.77534 -0.000148767			4.78737 0.000851959			4.76502 0.000798875
4.77591 -0.000144488			4.78795 0.000851888			4.7656 0.000824098
4.77649 -0.000140209			4.78852 0.000853288			4.76617 0.00085814
4.77706 -0.00012068			4.78909 0.000854688			4.76674 0.000879781
4.77763 -0.000129856			4.78967 0.000840556			4.76732 0.00091024
4.7782 -0.000111673			4.79024 0.000849967			4.76789 0.00093629
4.77878 -0.000107842			4.79081 0.000846135			4.76846 0.00096234
4.77935 -9.77322e-05			4.79139 0.000842304			4.76903 0.000985013
4.77992 -8.76223e-05			4.79196 0.000840771			4.76961 0.00100769
4.7805 -6.7197e-05			4.79253 0.000839238			4.77018 0.00103422
4.78107 -4.67717e-05			4.79311 0.000831493			4.77075 0.00104605
4.78164 -1.55825e-05			4.79368 0.000836827			4.77133 0.0010702
4.78222 -1.3097e-05			4.79425 0.000823115			4.7719 0.00109434
4.78279 -5.52864e-06			4.79482 0.000827713			4.77247 0.00111022
4.78336 3.07436e-05			4.7954 0.000822829			4.77305 0.00112609
4.78394 4.10029e-05			4.79597 0.000817944			4.77362 0.00114067
4.78451 6.56142e-05			4.79654 0.000813019			4.77419 0.00115525
4.78508 8.7385e-05			4.79712 0.000808094			4.77477 0.00116486
4.78565 0.000109156			4.79769 0.000811017			4.77534 0.0011833
4.78623 0.000119864			4.79826 0.000806092			4.77591 0.00119255
4.7868 0.000130572			4.79884 0.000805499			4.77649 0.0012018
4.78737 0.00015892			4.79941 0.000797059			4.77706 0.00120774
4.78795 0.000187269			4.79998 0.000791399			4.77763 0.00121369
4.78852 0.000198874			4.80056 0.000785738			4.7782 0.00121007
4.78909 0.000210479			4.80113 0.000789866			4.77878 0.00121528
4.78967 0.00022328			4.8017 0.000775684			4.77935 0.00122049
4.79024 0.000236081			4.80228 0.000779158			4.77992 0.00121688
4.79081 0.000241705			4.80285 0.000769553			4.7805 0.0012129
4.79139 0.00024733			4.80342 0.000767877			4.78107 0.00120892
4.79196 0.000263299			4.80399 0.000766202			4.78164 0.00119355
4.79253 0.000279267			4.80457 0.000755371			4.78222 0.00117818
4.79311 0.000275502			4.80514 0.000752387			4.78279 0.00116639
4.79368 0.000271736			4.80571 0.000746849			4.78336 0.00114578
4.79425 0.000265579			4.80629 0.000741311			4.78394 0.00112959
4.79482 0.000288125			4.80686 0.000731849			4.78451 0.00111339
4.7954 0.000272101			4.80743 0.000730235			4.78508 0.0010982
4.79597 0.00028478			4.80801 0.000723225			4.78565 0.0010742
4.79654 0.000272007			4.80858 0.000716216			4.78623 0.00104578
4.79712 0.000273586			4.80915 0.000714111			4.7868 0.00102619
4.79769 0.000259916			4.80973 0.000704159			4.78737 0.000993821
4.79826 0.00027495			4.8103 0.000700123			4.78795 0.000961455
4.79884 0.000261729			4.81087 0.000696087			4.78852 0.00093699
4.79941 0.000248508			4.81145 0.00067979			4.78909 0.000912525
4.79998 0.000265186			4.81202 0.000679187			4.78967 0.000881262
4.80056 0.000253161			4.81259 0.000663952			4.79024 0.000849999
4.80113 0.000254964			4.81316 0.000664412			4.79081 0.000823145
4.8017 0.000256767			4.81374 0.000653101			4.79139 0.000787472
4.80228 0.000256777			4.81431 0.00064179			4.79196 0.00076307
4.80285 0.000256786			4.81488 0.000631255			4.79253 0.000729849
4.80342 0.00025261			4.81546 0.000620721			4.79311 0.000701589
4.80399 0.000248433			4.81603 0.000612475			4.79368 0.000673329
4.80457 0.000244256			4.8166 0.000604229			4.79425 0.000638178
4.80514 0.00024008			4.81718 0.000606365			4.79482 0.000611847
4.80571 0.00023168			4.81775 0.000582343			4.7954 0.000579269
4.80629 0.00022328			4.81832 0.000573034			4.79597 0.000546691
4.80686 0.00020292			4.8189 0.000563726			4.79654 0.000531843
4.80743 0.00018256			4.81947 0.000555587			4.79712 0.000496418
4.80801 0.000179841			4.82004 0.000547449			4.79769 0.000469076
4.80858 0.000177122			4.82061 0.000535387			4.79826 0.000441734
4.80915 0.000174403			4.82119 0.000523325			4.79884 0.000413382
4.80973 0.000171684			4.82176 0.000518619			4.79941 0.000399728
4.8103 0.000160053			4.82233 0.000513914			4.79998 0.000373397
4.81087 0.000148423			4.82291 0.000500054			4.80056 0.000355885
4.81145 0.000148752			4.82348 0.000486193			4.80113 0.000330565
4.81202 0.000149081			4.82405 0.000474928			4.8017 0.000314063
4.81259 0.000146869			4.82463 0.000463663			4.80228 0.00028764
4.81316 0.000144657			4.8252 0.000453379			4.80285 0.000270036
4.81374 0.000128691			4.82577 0.000443095			4.80342 0.000256015
4.81431 0.000112725			4.82635 0.000426843			4.80399 0.000233175
4.81488 0.000130957			4.82692 0.000426286			4.80457 0.000214928
4.81546 0.000120485			4.82749 0.000412978			4.80514 0.00021138
4.81603 0.000114199			4.82807 0.000399669			4.80571 0.0001952
4.8166 0.000107913			4.82864 0.000390141			4.80629 0.00017902
4.81718 9.81887e-05			4.82921 0.000380613			4.80686 0.000163759
4.81775 8.84642e-05			4.82978 0.000373373			4.80743 0.000148498
4.81832 7.87398e-05			4.83036 0.00035044			4.80801 0.000141596
4.8189 6.90153e-05			4.83093 0.000343609			4.80858 0.000134695
4.81947 7.28579e-05			4.8315 0.000336778			4.80915 0.000119525
4.82004 7.67005e-05			4.83208 0.000325043			4.80973 0.000119055
4.82061 6.37992e-05			4.83265 0.000313308			4.8103 0.00011294
4.82119 5.08979e-05			4.83322 0.000302166			4.81087 0.000106825
4.82176 4.74151e-05			4.8338 0.000291023			4.81145 9.17071e-05
4.82233 4.39322e-05			4.83437 0.000288709			4.81202 9.42277e-05
4.82291 4.04493e-05			4.83494 0.0002707			4.81259 9.08689e-05
4.82348 3.69665e-05			4.83552 0.000258822			4.81316 8.751e-05
4.82405 3.30351e-05			4.83609 0.000246944			4.81374 8.52535e-05
4.82463 2.91038e-05			4.83666 0.000238008			4.81431 8.29971e-05
4.8252 4.31123e-05			4.83724 0.000229073			4.81488 8.47138e-05
4.82577 2.8417e-05			4.83781 0.000221379			4.81546 8.64306e-05
4.82635 1.37217e-05			4.83838 0.000213685			4.81603 8.81473e-05
4.82692 2.77302e-05			4.83895 0.000202067			4.8166 8.98641e-05
4.82749 2.37989e-05			4.83953 0.000190449			4.81718 9.24076e-05
4.82807 1.98675e-05			4.8401 0.000186597			4.81775 9.49512e-05
4.82864 1.94284e-05			4.84067 0.000182745			4.81832 9.74947e-05
4.82921 1.89892e-05			4.84125 0.000172354			4.8189 0.000100038
4.82978 1.67561e-05			4.84182 0.000161962			4.81947 0.00011023
4.83036 1.45229e-05			4.84239 0.000154575			4.82004 0.000120421
4.83093 3.42661e-05			4.84297 0.000147187			4.82061 0.000126203
4.8315 2.53055e-05			4.84354 0.0001398			4.82119 0.000131985
4.83208 2.35209e-05			4.84411 0.000132412			4.82176 0.000141625
4.83265 2.17363e-05			4.84469 0.00012903			4.82233 0.000151265
4.83322 3.96107e-05			4.84526 0.000125648			4.82291 0.000150984
4.8338 2.87814e-05			4.84583 0.000118342			4.82348 0.000168341
4.83437 3.4098e-05			4.84641 0.000111037			4.82405 0.000174444
4.83494 3.94145e-05			4.84698 0.000106224			4.82463 0.000180547
4.83552 4.24886e-05			4.84755 0.000101412			4.8252 0.000192163
4.83609 4.55627e-05			4.84812 0.000105754			4.82577 0.000203778
4.83666 4.86367e-05			4.8487 0.000110097			4.82635 0.000208871
4.83724 5.17108e-05			4.84927 0.00010651			4.82692 0.000213964
4.83781 5.30657e-05			4.84984 0.000102924			4.82749 0.000217954
4.83838 5.44205e-05			4.85042 9.93374e-05			4.82807 0.000221945
4.83895 5.57753e-05			4.85099 9.57509e-05			4.82864 0.000237183
4.83953 5.71302e-05			4.85156 9.77639e-05			4.82921 0.000234783
4.8401 7.08934e-05			4.85214 9.97768e-05			4.82978 0.000242304
4.84067 8.46567e-05			4.85271 9.7866e-05			4.83036 0.000249826
4.84125 8.347e-05			4.85328 9.59553e-05			4.83093 0.000256521
4.84182 8.22834e-05			4.85386 9.30637e-05			4.8315 0.000263215
4.84239 6.92116e-05			4.85443 9.0172e-05			4.83208 0.000271013
4.84297 8.48436e-05			4.855 9.21849e-05			4.83265 0.00027881
4.84354 8.43297e-05			4.85557 9.41978e-05			4.83322 0.000273585
4.84411 8.38158e-05			4.85615 8.50734e-05			4.8338 0.000285998
4.84469 8.40493e-05			4.85672 9.16434e-05			4.83437 0.000294002
4.84526 8.42829e-05			4.85729 8.93853e-05			4.83494 0.000302006
4.84583 8.45165e-05			4.85787 8.71271e-05			4.83552 0.000297608
4.84641 8.47501e-05			4.85844 8.93648e-05			4.83609 0.000310848
4.84698 8.92701e-05			4.85901 9.16025e-05			4.83666 0.000314167
4.84755 9.37901e-05			4.85959 8.40311e-05			4.83724 0.000317485
4.84812 9.83102e-05			4.86016 9.21543e-05			4.83781 0.000323859
4.8487 0.00010283			4.86073 0.000101136			4.83838 0.000330232
4.84927 0.00010436			4.86131 9.44226e-05			4.83895 0.000335503
4.84984 0.00010589			4.86188 9.75186e-05			4.83953 0.000340773
4.85042 0.00010742			4.86245 0.000100615			4.8401 0.000352107
4.85099 0.00010895			4.86303 0.000101258			4.84067 0.000345803
4.85156 0.00011205			4.8636 0.000101902			4.84125 0.00035383
4.85214 0.00011515			4.86417 0.000110066			4.84182 0.000361857
4.85271 0.000102104			4.86474 0.00011823			4.84239 0.000370251
4.85328 0.000117761			4.86532 0.000108166			4.84297 0.000378645
4.85386 0.000119067			4.86589 0.000113796			4.84354 0.00038263
4.85443 0.000120373			4.86646 0.000120733			4.84411 0.000386615
4.855 0.000123473			4.86704 0.000127671			4.84469 0.000389313
4.85557 0.000126572			4.86761 0.000123247			4.84526 0.000392012
4.85615 0.000129186			4.86818 0.000134517			4.84583 0.00039471
4.85672 0.0001318			4.86876 0.000133036			4.84641 0.000397409
4.85729 0.000134414			4.86933 0.000131554			4.84698 0.000401497
4.85787 0.000137028			4.8699 0.000136857			4.84755 0.000405585
4.85844 0.000135605			4.87048 0.00014216			4.84812 0.000409673
4.85901 0.000134183			4.87105 0.000156291			4.8487 0.000413761
4.85959 0.000139936			4.87162 0.000154728			4.84927 0.000416747
4.86016 0.00014569			4.8722 0.000156516			4.84984 0.000419732
4.86073 0.000144491			4.87277 0.000158304			4.85042 0.000422718
4.86131 0.000143293			4.87334 0.00016794			4.85099 0.000425704
4.86188 0.000143889			4.87391 0.00016188			4.85156 0.000427656
4.86245 0.000144484			4.87449 0.000169942			4.85214 0.000429608
4.86303 0.000137157			4.87506 0.000178004			4.85271 0.000432662
4.8636 0.000158533			4.87563 0.000186066			4.85328 0.000435717
4.86417 0.000156587			4.87621 0.000194128			4.85386 0.000429952
4.86474 0.000154641			4.87678 0.000188212			4.85443 0.000441826
4.86532 0.000148063			4.87735 0.00019799			4.855 0.000434959
4.86589 0.000141485			4.87793 0.000202864			4.85557 0.00044573
4.86646 0.000161219			4.8785 0.000207738			4.85615 0.000438197
4.86704 0.000152249			4.87907 0.000212898			4.85672 0.000448303
4.86761 0.000168843			4.87965 0.000218058			4.85729 0.000449589
4.86818 0.000156734			4.88022 0.000223218			4.85787 0.000450875
4.86876 0.000158976			4.88079 0.000228378			4.85844 0.000451426
4.86933 0.000161219			4.88137 0.000231821			4.85901 0.000451977
4.8699 0.000156584			4.88194 0.000235265			4.85959 0.000452529
4.87048 0.00015195			4.88251 0.00023037			4.86016 0.00045308
4.87105 0.000168843			4.88308 0.000241171			4.86073 0.000453516
4.87162 0.000157033			4.88366 0.000242816			4.86131 0.000453952
4.8722 0.000176468			4.88423 0.000252308			4.86188 0.000454389
4.87277 0.000167199			4.8848 0.000250029			4.86245 0.000454825
4.87334 0.000170488			4.88538 0.000263445			4.86303 0.000453516
4.87391 0.000173777			4.88595 0.000263129			4.8636 0.000452207
4.87449 0.000190371			4.88652 0.000270659			4.86417 0.000450898
4.87506 0.000178262			4.8871 0.000274756			4.86474 0.000449589
4.87563 0.000166152			4.88767 0.000278854			4.86532 0.000453327
4.87621 0.000182747			4.88824 0.00028103			4.86589 0.000457064
4.87678 0.000180355			4.88882 0.000283207			4.86646 0.000450513
4.87735 0.000177963			4.88939 0.000285383			4.86704 0.000443962
4.87793 0.000177365			4.88996 0.000287559			4.86761 0.000443841
4.8785 0.000176767			4.89053 0.000293005			4.86818 0.000443721
4.87907 0.000184092			4.89111 0.000298451			4.86876 0.000439191
4.87965 0.000191418			4.89168 0.000303898			4.86933 0.000434661
4.88022 0.000181999			4.89225 0.000309344			4.8699 0.000433805
4.88079 0.000172581			4.89283 0.000313339			4.87048 0.00043295
4.88137 0.00017288			4.8934 0.000317334			4.87105 0.000432094
4.88194 0.000173179			4.89397 0.00032231			4.87162 0.000431239
4.88251 0.000180654			4.89455 0.000327286			4.8722 0.0004268
4.88308 0.000188129			4.89512 0.000322453			4.87277 0.000422362
4.88366 0.000177925			4.89569 0.000333315			4.87334 0.000416821
4.88423 0.000167722			4.89627 0.00032652			4.87391 0.000411281
4.8848 0.000163798			4.89684 0.000335419			4.87449 0.000416373
4.88538 0.000188577			4.89741 0.000338638			4.87506 0.000403828
4.88595 0.000174786			4.89799 0.000341857			4.87563 0.000401204
4.88652 0.000175347			4.89856 0.000346056			4.87621 0.00039858
4.8871 0.000169628			4.89913 0.000350256			4.87678 0.000393751
4.88767 0.000178262			4.8997 0.000352493			4.87735 0.000388923
4.88824 0.000165704			4.90028 0.000354731			4.87793 0.000384094
4.88882 0.000167498			4.90085 0.000356969			4.8785 0.000379265
4.88939 0.000153146			4.90142 0.000359206			4.87907 0.000374896
4.88996 0.000167498			4.902 0.000360632			4.87965 0.000370527
4.89053 0.00015793			4.90257 0.000362057			4.88022 0.000366157
4.89111 0.000148362			4.90314 0.00037133			4.88079 0.000361788
4.89168 0.000168694			4.90372 0.000364908			4.88137 0.000354846
4.89225 0.000160322			4.90429 0.000378104			4.88194 0.000347905
4.89283 0.000153146			4.90486 0.000375606			4.88251 0.000340963
4.8934 0.00014597			4.90544 0.000377031			4.88308 0.000334021
4.89397 0.000160322			4.90601 0.000378457			4.88366 0.000328888
4.89455 0.00014597			4.90658 0.000382825			4.88423 0.000323755
4.89512 0.000141186			4.90716 0.000387193			4.8848 0.000318622
4.89569 0.000136402			4.90773 0.000387637			4.88538 0.000313489
4.89627 0.000141784			4.9083 0.000388082			4.88595 0.000306978
4.89684 0.000147166			4.90887 0.000390243			4.88652 0.000300467
4.89741 0.000140812			4.90945 0.000392404			4.8871 0.000293405
4.89799 0.000134459			4.91002 0.000394565			4.88767 0.000286343
4.89856 0.000135281			4.91059 0.000396726			4.88824 0.000277076
4.89913 0.000136103			4.91117 0.000401748			4.88882 0.00025899
4.8997 0.000127357			4.91174 0.00040677			4.88939 0.000257072
4.90028 0.000118612			4.91231 0.000406888			4.88996 0.000246335
4.90085 0.000117042			4.91289 0.000407005			4.89053 0.000249103
4.90142 0.000115472			4.91346 0.000415706			4.89111 0.000234232
4.902 0.000114274			4.91403 0.000408712			4.89168 0.000228731
4.90257 0.000113076			4.91461 0.00041545			4.89225 0.000223231
4.90314 0.000104701			4.91518 0.000414342			4.89283 0.000213757
4.90372 9.6327e-05			4.91575 0.000412743			4.8934 0.000204283
4.90429 0.000100959			4.91633 0.000418991			4.89397 0.00019481
4.90486 0.000105591			4.9169 0.000416901			4.89455 0.000185336
4.90544 9.82634e-05			4.91747 0.000422659			4.89512 0.000178894
4.90601 9.09356e-05			4.91804 0.000408553			4.89569 0.000172452
4.90658 9.03727e-05			4.91862 0.000410142			4.89627 0.00016601
4.90716 8.98097e-05			4.91919 0.000419578			4.89684 0.000159567
4.90773 8.92468e-05			4.91976 0.000421167			4.89741 0.000147797
4.9083 8.86838e-05			4.92034 0.000419982			4.89799 0.000136027
4.90887 8.73734e-05			4.92091 0.000418797			4.89856 0.000131606
4.90945 8.60629e-05			4.92148 0.000417121			4.89913 0.000127185
4.91002 8.47525e-05			4.92206 0.000415445			4.8997 0.000120191
4.91059 8.3442e-05			4.92263 0.00041753			4.90028 0.000113198
4.91117 8.10851e-05			4.9232 0.000419614			4.90085 0.000106205
4.91174 7.87281e-05			4.92378 0.000422679			4.90142 9.92115e-05
4.91231 7.63712e-05			4.92435 0.000425745			4.902 8.70392e-05
4.91289 7.40142e-05			4.92492 0.000419083			4.90257 7.48669e-05
4.91346 7.34513e-05			4.9255 0.000428115			4.90314 7.0044e-05
4.91403 7.28883e-05			4.92607 0.000424396			4.90372 6.5221e-05
4.91461 7.23253e-05			4.92664 0.000420677			4.90429 5.8377e-05
4.91518 7.17624e-05			4.92721 0.0004199			4.90486 5.15329e-05
4.91575 7.14237e-05			4.92779 0.000419124			4.90544 4.46889e-05
4.91633 7.1085e-05			4.92836 0.000418347			4.90601 3.78449e-05
4.9169 7.07463e-05			4.92893 0.00041757			4.90658 2.98066e-05
4.91747 7.04076e-05			4.92951 0.000420329			4.90716 2.17683e-05
4.91804 7.41053e-05			4.93008 0.000423088			4.90773 1.75884e-05
4.91862 7.78031e-05			4.93065 0.000420942			4.9083 1.34085e-05
4.91919 7.34279e-05			4.93123 0.000418797			4.90887 9.2286e-06
4.91976 6.90527e-05			4.9318 0.000430465			4.90945 -3.77046e-06
4.92034 7.53691e-05			4.93237 0.00042644			4.91002 -7.8481e-07
4.92091 6.73335e-05			4.93295 0.000422087			4.91059 -1.54375e-05
4.92148 8.35168e-05			4.93352 0.000417734			4.91117 -2.30853e-05
4.92206 7.09962e-05			4.93409 0.000420227			4.91174 -1.30949e-05
4.92263 8.6432e-05			4.93466 0.00042272			4.91231 -1.85379e-05
4.9232 0.000101868			4.93524 0.000418674			4.91289 -2.3981e-05
4.92378 9.87657e-05			4.93581 0.000414628			4.91346 -2.76786e-05
4.92435 9.56636e-05			4.93638 0.000415895			4.91403 -3.13762e-05
4.92492 9.15523e-05			4.93696 0.000417162			4.91461 -3.50738e-05
4.9255 8.74411e-05			4.93753 0.000417938			4.91518 -3.87714e-05
4.92607 9.82798e-05			4.9381 0.000418715			4.91575 -3.87714e-05
4.92664 0.000109118			4.93868 0.000420105			4.91633 -3.87714e-05
4.92721 7.66024e-05			4.93925 0.000413647			4.9169 -3.87714e-05
4.92779 9.19261e-05			4.93982 0.000419451			4.91747 -3.87714e-05
4.92836 0.000100373			4.9404 0.000417407			4.91804 -3.98738e-05
4.92893 0.000123171			4.94097 0.00042035			4.91862 -4.09762e-05
4.92951 9.54767e-05			4.94154 0.000415445			4.91919 -4.15274e-05
4.93008 9.64858e-05			4.94212 0.000413156			4.91976 -4.20786e-05
4.93065 0.00011693			4.94269 0.000426562			4.92034 -4.24576e-05
4.93123 0.00010867			4.94326 0.000411767			4.92091 -3.40174e-05
4.9318 0.000100261			4.94383 0.000412666			4.92148 -3.49475e-05
4.93237 0.000120555			4.94441 0.000419287			4.92206 -2.70585e-05
4.93295 0.000106764			4.94498 0.000418061			4.92263 -2.74375e-05
4.93352 0.000121676			4.94555 0.000412829			4.9232 -1.89973e-05
4.93409 0.000116481			4.94613 0.000407598			4.92378 -2.54394e-05
4.93466 0.000111286			4.9467 0.000408415			4.92435 -1.42432e-05
4.93524 0.000124629			4.94727 0.000409233			4.92492 -6.53792e-06
4.93581 0.000137972			4.94785 0.000411603			4.9255 -7.6518e-06
4.93638 0.000132179			4.94842 0.000413974			4.92607 -2.70251e-06
4.93696 0.000126386			4.94899 0.000416344			4.92664 2.24677e-06
4.93753 0.000134346			4.94957 0.000418715			4.92721 9.58458e-06
4.9381 0.000142307			4.95014 0.000417816			4.92779 1.69224e-05
4.93868 0.000128089			4.95071 0.000416917			4.92836 1.48898e-05
4.93925 0.000142574			4.95129 0.000412094			4.92893 3.04956e-05
4.93982 0.000140913			4.95186 0.000407271			4.92951 3.07942e-05
4.9404 0.000139252			4.95243 0.000409396			4.93008 3.99119e-05
4.94097 0.000143721			4.953 0.000411522			4.93065 5.39904e-05
4.94154 0.000148189			4.95358 0.000413647			4.93123 5.04305e-05
4.94212 0.000136512			4.95415 0.000415772			4.9318 6.69894e-05
4.94269 0.000153538			4.95472 0.000414464			4.93237 6.591e-05
4.94326 0.000155914			4.9553 0.000413156			4.93295 7.47521e-05
4.94383 0.00015829			4.95587 0.000415772			4.93352 8.35942e-05
4.94441 0.000148107			4.95644 0.000418388			4.93409 8.56612e-05
4.94498 0.000166629			4.95702 0.000417167			4.93466 0.000105366
4.94555 0.000151962			4.95759 0.000415946			4.93524 0.000110741
4.94613 0.000165998			4.95816 0.000414725			4.93581 0.000116115
4.9467 0.000173756			4.95874 0.000413504			4.93638 0.000124612
4.94727 0.000167161			4.95931 0.000413345			4.93696 0.00013311
4.94785 0.000168752			4.95988 0.000413187			4.93753 0.000141608
4.94842 0.000170343			4.96046 0.000416952			4.9381 0.000150105
4.94899 0.000171037			4.96103 0.000420718			4.93868 0.000162243
4.94957 0.000171731			4.9616 0.000421969			4.93925 0.000174381
4.95014 0.000171976			4.96217 0.000423221			4.93982 0.000179169
4.95071 0.000172221			4.96275 0.000419568			4.9404 0.000183958
4.95129 0.000182333			4.96332 0.000415915			4.94097 0.000194901
4.95186 0.000178094			4.96389 0.000424278			4.94154 0.000205845
4.95243 0.00016238			4.96447 0.000416947			4.94212 0.000212379
4.953 0.00017537			4.96504 0.000427272			4.94269 0.000218913
4.95358 0.000178493			4.96561 0.000421903			4.94326 0.000232521
4.95415 0.000181616			4.96619 0.000425545			4.94383 0.000246128
4.95472 0.000182945			4.96676 0.000429188			4.94441 0.000252387
4.9553 0.000184274			4.96733 0.000427926			4.94498 0.000258645
4.95587 0.000185604			4.96791 0.000426664			4.94555 0.00026573
4.95644 0.000186933			4.96848 0.000429408			4.94613 0.000272815
4.95702 0.000184802			4.96905 0.000432151			4.9467 0.00028431
4.95759 0.000182672			4.96962 0.000430971			4.94727 0.000286986
4.95816 0.000187718			4.9702 0.000429791			4.94785 0.000305221
4.95874 0.000192763			4.97077 0.000434312			4.94842 0.000314637
4.95931 0.000186596			4.97134 0.000438834			4.94899 0.000308804
4.95988 0.00018043			4.97192 0.000436816			4.94957 0.000320609
4.96046 0.000181439			4.97249 0.000434798			4.95014 0.000323135
4.96103 0.000182448			4.97306 0.000434006			4.95071 0.000334481
4.9616 0.000177739			4.97364 0.000433214			4.95129 0.000337558
4.96217 0.000173029			4.97421 0.00044125			4.95186 0.000340636
4.96275 0.000188054			4.97478 0.000433592			4.95243 0.000348238
4.96332 0.000203079			4.97536 0.000440039			4.953 0.000355839
4.96389 0.000169666			4.97593 0.000446487			4.95358 0.000357929
4.96447 0.000184092			4.9765 0.000439202			4.95415 0.000360019
4.96504 0.000183569			4.97708 0.000447611			4.95472 0.000376716
4.96561 0.000183046			4.97765 0.000447437			4.9553 0.000375774
4.96619 0.000188951			4.97822 0.000447263			4.95587 0.000379242
4.96676 0.000194856			4.97879 0.000448071			4.95644 0.00038271
4.96733 0.000193585			4.97937 0.000448878			4.95702 0.000395457
4.96791 0.000192315			4.97994 0.000446722			4.95759 0.000390565
4.96848 0.000190446			4.98051 0.000444566			4.95816 0.000395595
4.96905 0.000188577			4.98109 0.000451238			4.95874 0.000400624
4.96962 0.000186708			4.98166 0.000442216			4.95931 0.000405654
4.9702 0.00018484			4.98223 0.000446272			4.95988 0.000410684
4.97077 0.000181962			4.98281 0.000450329			4.96046 0.000410201
4.97134 0.000179084			4.98338 0.000444576			4.96103 0.000409719
4.97192 0.000176206			4.98395 0.000454518			4.9616 0.000421202
4.97249 0.000173328			4.98453 0.000452444			4.96217 0.000415047
4.97306 0.00017942			4.9851 0.00045037			4.96275 0.000418814
4.97364 0.000185513			4.98567 0.000449276			4.96332 0.00042258
4.97421 0.000174861			4.98625 0.000448183			4.96389 0.000425152
4.97478 0.000164209			4.98682 0.000449133			4.96447 0.000427725
4.97536 0.00016946			4.98739 0.000450084			4.96504 0.000425887
4.97593 0.000174711			4.98796 0.000446129			4.96561 0.00042405
4.9765 0.000172786			4.98854 0.000457869			4.96619 0.000422827
4.97708 0.000170862			4.98911 0.00045651			4.96676 0.000421604
4.97765 0.000163405			4.98968 0.000455152			4.96733 0.000425893
4.97822 0.000155949			4.99026 0.000455754			4.96791 0.000430182
4.97879 0.000160453			4.99083 0.000456357			4.96848 0.000418486
4.97937 0.000164956			4.9914 0.000450584			4.96905 0.000424429
4.97994 0.0001612			4.99198 0.000460506			4.96962 0.00042045
4.98051 0.000157444			4.99255 0.000457675			4.9702 0.000416471
4.98109 0.000153688			4.99312 0.000454845			4.97077 0.000415478
4.98166 0.000149932			4.9937 0.000455606			4.97134 0.000414484
4.98223 0.000146923			4.99427 0.000456367			4.97192 0.000413491
4.98281 0.000143914			4.99484 0.00045811			4.97249 0.000412498
4.98338 0.000140906			4.99542 0.000459852			4.97306 0.000406176
4.98395 0.000137897			4.99599 0.000449823			4.97364 0.000399855
4.98453 0.000135935			4.99656 0.000455489			4.97421 0.000397943
4.9851 0.000133973			4.99713 0.000459847			4.97478 0.000396031
4.98567 0.000133805			4.99771 0.000464204			4.97536 0.000395078
4.98625 0.000133636			4.99828 0.000453542			4.97593 0.000394125
4.98682 0.000117322			4.99885 0.000458575			4.9765 0.000388762
4.98739 0.000129712			4.99943 0.00045249			4.97708 0.000383399
4.98796 0.000125956			5 0.000446405			4.97765 0.000381252
4.98854 0.0001222			5.00057 0.000468113			4.97822 0.000379105
4.98911 0.000120462			5.00115 0.0004532			4.97879 0.000379529
4.98968 0.000118724			5.00172 0.000463791			4.97937 0.000362316
4.99026 0.00011878			5.00229 0.000458687			4.97994 0.000360858
4.99083 0.000118836			5.00287 0.000457149			4.98051 0.000359399
4.9914 0.000105736			5.00344 0.000455611			4.98109 0.000356838
4.99198 0.00012134			5.00401 0.000453093			4.98166 0.000354278
4.99255 0.000107044			5.00458 0.000450574			4.98223 0.00034942
4.99312 9.27483e-05			5.00516 0.000451979			4.98281 0.000344563
4.9937 0.000112043			5.00573 0.000453384			4.98338 0.000338603
4.99427 0.000102634			5.0063 0.000450865			4.98395 0.000332643
4.99484 9.56168e-05			5.00688 0.000448346			4.98453 0.000337116
4.99542 8.85997e-05			5.00745 0.000448484			4.9851 0.00032395
4.99599 9.98215e-05			5.00802 0.000448622			4.98567 0.000320706
4.99656 8.23394e-05			5.0086 0.00044876			4.98625 0.000317462
4.99713 8.81793e-05			5.00917 0.000448898			4.98682 0.000311738
4.99771 9.40191e-05			5.00974 0.000449036			4.98739 0.000306014
4.99828 9.64951e-05			5.01032 0.000449174			4.98796 0.000300289
4.99885 9.89712e-05			5.01089 0.000449312			4.98854 0.000294565
4.99943 0.000126563			5.01146 0.00044945			4.98911 0.000289851
5 8.71795e-05			5.01204 0.000448081			4.98968 0.000285137
5.00057 6.00547e-05			5.01261 0.000446712			4.99026 0.000276014
5.00115 9.99056e-05			5.01318 0.000449266			4.99083 0.00026689
5.00172 7.81628e-05			5.01375 0.000451821			4.9914 0.000259328
5.00229 0.00010426			5.01433 0.000448898			4.99198 0.000251767
5.00287 0.00011137			5.0149 0.000445976			4.99255 0.000248614
5.00344 0.000118481			5.01547 0.000443054			4.99312 0.000245462
5.00401 0.000116621			5.01605 0.000440131			4.9937 0.000242316
5.00458 0.000114762			5.01662 0.000440213			4.99427 0.000239169
5.00516 0.000104381			5.01719 0.000440295			4.99484 0.000221692
5.00573 9.40004e-05			5.01777 0.000440377			4.99542 0.000221853
5.0063 8.36195e-05			5.01834 0.000440458			4.99599 0.000213929
5.00688 7.32387e-05			5.01891 0.000441031			4.99656 0.000206006
5.00745 6.59973e-05			5.01949 0.000441603			4.99713 0.000203594
5.00802 5.8756e-05			5.02006 0.000438251			4.99771 0.000201183
5.0086 3.77607e-05			5.02063 0.0004349			4.99828 0.000190549
5.00917 1.67654e-05			5.02121 0.000432213			4.99885 0.000179916
5.00974 4.03209e-05			5.02178 0.000429525			4.99943 0.00018839
5.01032 3.51725e-05			5.02235 0.000430762			5 0.000179227
5.01089 3.42101e-05			5.02292 0.000431998			5.00057 0.000149393
5.01146 3.32477e-05			5.0235 0.000427512			5.00115 0.000148957
5.01204 2.93981e-05			5.02407 0.000423027			5.00172 0.000147051
5.01261 2.55485e-05			5.02464 0.000425081			5.00229 0.000145145
5.01318 2.16989e-05			5.02522 0.000427134			5.00287 0.000139202
5.01375 1.78493e-05			5.02579 0.000427942			5.00344 0.000133259
5.01433 1.86341e-05			5.02636 0.000428749			5.00401 0.000127317
5.0149 1.9419e-05			5.02694 0.000420401			5.00458 0.000121374
5.01547 2.02039e-05			5.02751 0.000412053			5.00516 0.000111757
5.01605 2.09888e-05			5.02808 0.00041613			5.00573 0.00010214
5.01662 1.84847e-05			5.02866 0.000420207			5.0063 0.000106854
5.01719 1.59805e-05			5.02923 0.000415619			5.00688 9.39291e-05
5.01777 1.52704e-05			5.0298 0.000411031			5.00745 8.93416e-05
5.01834 1.45603e-05			5.03038 0.000409792			5.00802 8.4754e-05
5.01891 1.16077e-05			5.03095 0.000416401			5.0086 7.90641e-05
5.01949 3.73589e-05			5.03152 0.000405843			5.00917 7.33741e-05
5.02006 2.06524e-05			5.03209 0.00041098			5.00974 6.68574e-05
5.02063 3.26497e-05			5.03267 0.000408188			5.01032 6.03406e-05
5.02121 1.54199e-05			5.03324 0.000405396			5.01089 5.49262e-05
5.02178 2.6894e-05			5.03381 0.000394757			5.01146 4.95119e-05
5.02235 2.40161e-05			5.03439 0.000399812			5.01204 3.77013e-05
5.02292 2.11383e-05			5.03496 0.000398982			5.01261 4.35291e-05
5.0235 2.16989e-05			5.03553 0.000398152			5.01318 3.83329e-05
5.02407 2.22595e-05			5.03611 0.00038555			5.01375 3.31368e-05
5.02464 1.86341e-05			5.03668 0.000388644			5.01433 3.85052e-05
5.02522 4.37126e-05			5.03725 0.000387568			5.0149 2.62353e-05
5.02579 4.44975e-05			5.03783 0.000386493			5.01547 2.3887e-05
5.02636 4.52824e-05			5.0384 0.000388687			5.01605 2.15387e-05
5.02694 5.68312e-05			5.03897 0.000375187			5.01662 2.01549e-05
5.02751 3.96761e-05			5.03954 0.000376099			5.01719 1.87712e-05
5.02808 4.71885e-05			5.04012 0.000377011			5.01777 1.00382e-05
5.02866 5.47008e-05			5.04069 0.000373999			5.01834 1.30514e-06
5.02923 6.22131e-05			5.04126 0.000370988			5.01891 1.66687e-06
5.0298 6.97255e-05			5.04184 0.000360946			5.01949 2.02859e-06
5.03038 6.81651e-05			5.04241 0.000366599			5.02006 -4.95898e-06
5.03095 9.53085e-05			5.04298 0.000363424			5.02063 -1.19465e-05
5.03152 0.000110193			5.04356 0.000360249			5.02121 -1.2693e-05
5.03209 0.000139429			5.04413 0.000357911			5.02178 -1.34394e-05
5.03267 0.000162237			5.0447 0.000355574			5.02235 -1.96977e-05
5.03324 0.000185045			5.04528 0.000353237			5.02292 -2.59561e-05
5.03381 0.000239846			5.04585 0.000350899			5.0235 -2.02719e-05
5.03439 0.000294647			5.04642 0.000345129			5.02407 -3.2226e-05
5.03496 0.000371648			5.047 0.000339358			5.02464 -3.42585e-05
5.03553 0.00044865			5.04757 0.000340127			5.02522 -3.62911e-05
5.03611 0.000600999			5.04814 0.000340896			5.02579 -3.62796e-05
5.03668 0.000801187			5.04871 0.000336702			5.02636 -3.62681e-05
5.03725 0.00112247			5.04929 0.000332507			5.02694 -4.61782e-05
5.03783 0.00166382			5.04986 0.000332727			5.02751 -3.84499e-05
5.0384 0.00256755			5.05043 0.000332947			5.02808 -4.06432e-05
5.03897 0.00384443			5.05101 0.000328671			5.02866 -4.28365e-05
5.03954 0.00512034			5.05158 0.000332242			5.02923 -5.82585e-05
5.04012 0.00627186			5.05215 0.00032208			5.0298 -5.60423e-05
5.04069 0.00743894			5.05273 0.000319766			5.03038 -5.70528e-05
5.04126 0.00832854			5.0533 0.000322826			5.03095 -5.80633e-05
5.04184 0.00817823			5.05387 0.000310192			5.03152 -6.2381e-05
5.04241 0.00646834			5.05445 0.00031129			5.03209 -6.66987e-05
5.04298 0.00464244			5.05502 0.000304541			5.03267 -6.4494e-05
5.04356 0.00343846			5.05559 0.000304904			5.03324 -6.22892e-05
5.04413 0.00249349			5.05617 0.000305267			5.03381 -6.4494e-05
5.0447 0.00174944			5.05674 0.000301215			5.03439 -6.66987e-05
5.04528 0.0012434			5.05731 0.000297164			5.03496 -6.84212e-05
5.04585 0.000900006			5.05788 0.000295754			5.03553 -7.01437e-05
5.04642 0.000678009			5.05846 0.000294344			5.03611 -7.18662e-05
5.047 0.000522988			5.05903 0.00028901			5.03668 -7.35887e-05
5.04757 0.000428065			5.0596 0.000283677			5.03725 -7.48519e-05
5.04814 0.000361847			5.06018 0.000277362			5.03783 -7.6115e-05
5.04871 0.000311064			5.06075 0.000271047			5.0384 -6.74566e-05
5.04929 0.000274633			5.06132 0.000273888			5.03897 -7.64366e-05
5.04986 0.000243883			5.0619 0.000276728			5.03954 -7.58394e-05
5.05043 0.000213132			5.06247 0.000277485			5.04012 -7.52423e-05
5.05101 0.00020391			5.06304 0.000278241			5.04069 -7.57476e-05
5.05158 0.000194688			5.06362 0.000274092			5.04126 -7.62528e-05
5.05215 0.00017829			5.06419 0.000285638			5.04184 -7.40021e-05
5.05273 0.000161892			5.06476 0.000276912			5.04241 -7.17514e-05
5.0533 0.000145419			5.06534 0.000268186			5.04298 -7.39102e-05
5.05387 0.000128946			5.06591 0.000260441			5.04356 -7.60691e-05
5.05445 0.000124433			5.06648 0.000252696			5.04413 -7.9537e-05
5.05502 0.00011992			5.06705 0.000248603			5.0447 -8.3005e-05
5.05559 0.000117799			5.06763 0.000244509			5.04528 -8.20634e-05
5.05617 0.000115678			5.0682 0.000240416			5.04585 -8.11217e-05
5.05674 0.000104587			5.06877 0.000236322			5.04642 -8.18337e-05
5.05731 0.0001222			5.06935 0.000230022			5.047 -8.25457e-05
5.05788 0.000112566			5.06992 0.000223721			5.04757 -8.32576e-05
5.05846 0.000102933			5.07049 0.000221344			5.04814 -8.39696e-05
5.05903 0.00010227			5.07107 0.000218967			5.04871 -8.57782e-05
5.0596 0.000101606			5.07164 0.000215017			5.04929 -8.75868e-05
5.06018 0.000102288			5.07221 0.000211066			5.04986 -7.94739e-05
5.06075 0.00010297			5.07279 0.000210549			5.05043 -8.89992e-05
5.06132 0.000103652			5.07336 0.000202185			5.05101 -8.92461e-05
5.0619 0.000104335			5.07393 0.000208942			5.05158 -8.9493e-05
5.06247 0.000100606			5.0745 0.000200006			5.05215 -8.64327e-05
5.06304 9.68782e-05			5.07508 0.000197281			5.05273 -8.33724e-05
5.06362 9.88311e-05			5.07565 0.00018671			5.0533 -8.43083e-05
5.06419 0.000115136			5.07622 0.000188343			5.05387 -8.52442e-05
5.06476 0.000101391			5.0768 0.000189977			5.05445 -8.50777e-05
5.06534 0.00011635			5.07737 0.00018033			5.05502 -8.49112e-05
5.06591 0.000112174			5.07794 0.000170683			5.05559 -9.08079e-05
5.06648 9.36453e-05			5.07852 0.00018466			5.05617 -7.90662e-05
5.06705 9.67194e-05			5.07909 0.000172479			5.05674 -8.16557e-05
5.06763 9.97935e-05			5.07966 0.000171088			5.05731 -8.42452e-05
5.0682 0.00010526			5.08024 0.000169697			5.05788 -8.19543e-05
5.06877 8.20218e-05			5.08081 0.000166079			5.05846 -7.96634e-05
5.06935 0.000102886			5.08138 0.00016246			5.05903 -7.73724e-05
5.06992 0.000109399			5.08196 0.000158842			5.0596 -7.50815e-05
5.07049 9.76724e-05			5.08253 0.000155224			5.06018 -7.63734e-05
5.07107 8.59461e-05			5.0831 0.000150706			5.06075 -7.76653e-05
5.07164 0.000111894			5.08367 0.000146189			5.06132 -7.89571e-05
5.07221 9.00013e-05			5.08425 0.000141671			5.0619 -8.0249e-05
5.07279 9.50188e-05			5.08482 0.000129306			5.06247 -7.7338e-05
5.07336 0.000100036			5.08539 0.000135043			5.06304 -7.4427e-05
5.07393 0.000106698			5.08597 0.000132933			5.06362 -7.1516e-05
5.0745 0.000113361			5.08654 0.000131641			5.06419 -6.8605e-05
5.07508 9.31127e-05			5.08711 0.000122501			5.06476 -6.97361e-05
5.07565 0.000120705			5.08769 0.000126849			5.06534 -7.08672e-05
5.07622 0.000128787			5.08826 0.000115502			5.06591 -7.19983e-05
5.0768 0.000136869			5.08883 0.000121321			5.06648 -7.31294e-05
5.07737 0.000147942			5.08941 0.000111445			5.06705 -7.41342e-05
5.07794 0.000159014			5.08998 0.000106434			5.06763 -7.51389e-05
5.07852 0.000161714			5.09055 0.000101422			5.0682 -6.62222e-05
5.07909 0.000164414			5.09113 9.93527e-05			5.06877 -7.49437e-05
5.07966 0.000150969			5.0917 9.72836e-05			5.06935 -6.98854e-05
5.08024 0.000166227			5.09227 9.49693e-05			5.06992 -6.4827e-05
5.08081 0.000150464			5.09284 9.2655e-05			5.07049 -7.52021e-05
5.08138 0.000134702			5.09342 9.08311e-05			5.07107 -6.79389e-05
5.08196 0.000129703			5.09399 8.90072e-05			5.07164 -6.92193e-05
5.08253 0.000110352			5.09456 8.08023e-05			5.07221 -7.04997e-05
5.0831 0.000105801			5.09514 8.04447e-05			5.07279 -6.62681e-05
5.08367 0.000115603			5.09571 8.45012e-05			5.07336 -6.20365e-05
5.08425 9.84947e-05			5.09628 7.28631e-05			5.07393 -6.44193e-05
5.08482 0.00011009			5.09686 7.05437e-05			5.0745 -6.68021e-05
5.08539 0.000127329			5.09743 6.82242e-05			5.07508 -6.18356e-05
5.08597 0.000115865			5.098 6.49239e-05			5.07565 -5.68691e-05
5.08654 0.000102307			5.09858 6.16235e-05			5.07622 -5.97399e-05
5.08711 0.000103101			5.09915 5.98354e-05			5.0768 -6.26107e-05
5.08769 0.000107035			5.09972 5.80473e-05			5.07737 -6.21743e-05
5.08826 0.000110969			5.1003 5.62592e-05			5.07794 -6.1738e-05
5.08883 0.000107726			5.10087 5.44711e-05			5.07852 -4.9359e-05
5.08941 0.000104484			5.10144 4.70427e-05			5.07909 -5.46184e-05
5.08998 0.000107072			5.10201 3.96144e-05			5.07966 -4.99561e-05
5.09055 9.53085e-05			5.10259 3.97064e-05			5.08024 -4.52939e-05
5.09113 0.00011494			5.10316 3.97983e-05			5.08081 -4.51791e-05
5.0917 0.000105867			5.10373 2.99829e-05			5.08138 -4.50643e-05
5.09227 0.000100382			5.10431 3.58619e-05			5.08196 -4.49494e-05
5.09284 9.48974e-05			5.10488 3.29128e-05			5.08253 -4.48346e-05
5.09342 0.000109147			5.10545 2.99637e-05			5.0831 -4.18719e-05
5.09399 9.46918e-05			5.10603 2.64424e-05			5.08367 -3.89092e-05
5.09456 0.000109576			5.1066 2.29211e-05			5.08425 -3.59466e-05
5.09514 9.5757e-05			5.10717 1.93998e-05			5.08482 -3.29839e-05
5.09571 8.55256e-05			5.10775 1.58785e-05			5.08539 -3.52174e-05
5.09628 0.000103998			5.10832 1.1785e-05			5.08597 -3.74509e-05
5.09686 0.000113501			5.10889 7.69147e-06			5.08654 -2.53533e-05
5.09743 9.42994e-05			5.10947 3.59797e-06			5.08711 -3.08939e-05
5.098 0.000109184			5.11004 -4.95535e-07			5.08769 -3.03714e-05
5.09858 9.53646e-05			5.11061 -1.31934e-06			5.08826 -2.9849e-05
5.09915 9.8476e-05			5.11118 -2.14315e-06			5.08883 -1.94049e-05
5.09972 0.000101587			5.11176 -2.96696e-06			5.08941 -2.65992e-05
5.1003 0.000102905			5.11233 -3.79077e-06			5.08998 -3.00499e-05
5.10087 0.000104222			5.1129 -3.45997e-06			5.09055 -1.58623e-05
5.10144 0.00010554			5.11348 -3.12917e-06			5.09113 -2.70298e-05
5.10201 0.000106857			5.11405 -1.16352e-06			5.0917 -2.0559e-05
5.10259 0.000108175			5.11462 8.02124e-07			5.09227 -2.04269e-05
5.10316 0.000109492			5.1152 -1.46433e-05			5.09284 -2.02949e-05
5.10373 0.000107362			5.11577 -3.93127e-06			5.09342 -1.90604e-05
5.10431 0.000105231			5.11634 -1.57801e-05			5.09399 -1.7826e-05
5.10488 0.000101307			5.11692 -1.19344e-05			5.09456 -1.54375e-05
5.10545 9.73828e-05			5.11749 -2.10857e-05			5.09514 -1.30489e-05
5.10603 0.000110202			5.11806 -1.45424e-05			5.09571 -2.0582e-05
5.1066 9.43181e-05			5.11863 -2.23859e-05			5.09628 -1.04767e-05
5.10717 0.000101756			5.11921 -3.02293e-05			5.09686 -6.98577e-06
5.10775 0.000109193			5.11978 -2.92446e-05			5.09743 -3.49486e-06
5.10832 0.000112931			5.12035 -2.82598e-05			5.098 -1.32327e-05
5.10889 0.000116668			5.12093 -3.11987e-05			5.09858 -5.33218e-06
5.10947 0.00011024			5.1215 -3.41376e-05			5.09915 -1.31304e-06
5.11004 0.000103811			5.12207 -3.49857e-05			5.09972 2.7061e-06
5.11061 9.02068e-05			5.12265 -3.58338e-05			5.1003 3.41807e-06
5.11118 0.000105306			5.12322 -3.76628e-05			5.10087 4.13003e-06
5.11176 0.000102466			5.12379 -3.94917e-05			5.10144 5.94438e-06
5.11233 9.96253e-05			5.12437 -3.12664e-05			5.10201 7.75874e-06
5.1129 0.000111211			5.12494 -3.87356e-05			5.10259 1.94946e-05
5.11348 9.40938e-05			5.12551 -3.29626e-05			5.10316 1.35922e-05
5.11405 9.31221e-05			5.12609 -3.50368e-05			5.10373 1.4442e-05
5.11462 9.21503e-05			5.12666 -3.51083e-05			5.10431 1.52918e-05
5.1152 9.8803e-05			5.12723 -3.51798e-05			5.10488 1.50391e-05
5.11577 0.000105456			5.1278 -3.57418e-05			5.10545 1.47865e-05
5.11634 0.000104933			5.12838 -3.63038e-05			5.10603 1.71061e-05
5.11692 0.000104409			5.12895 -3.94815e-05			5.1066 1.94257e-05
5.11749 0.000104746			5.12952 -4.26592e-05			5.10717 2.17454e-05
5.11806 0.000105082			5.1301 -4.97606e-05			5.10775 2.4065e-05
5.11863 0.000105418			5.13067 -5.6862e-05			5.10832 2.3376e-05
5.11921 0.000105755			5.13124 -5.53497e-05			5.10889 2.2687e-05
5.11978 0.000102055			5.13182 -5.38375e-05			5.10947 2.1998e-05
5.12035 9.83545e-05			5.13239 -5.62489e-05			5.11004 2.1309e-05
5.12093 0.00010183			5.13296 -5.86603e-05			5.11061 2.78774e-05
5.1215 0.000105306			5.13354 -5.75568e-05			5.11118 3.44458e-05
5.12207 0.000100177			5.13411 -5.64533e-05			5.11176 2.20899e-05
5.12265 9.50469e-05			5.13468 -6.51588e-05			5.11233 3.03119e-05
5.12322 9.52991e-05			5.13526 -5.81699e-05			5.1129 3.11501e-05
5.12379 9.55514e-05			5.13583 -5.66576e-05			5.11348 3.19884e-05
5.12437 0.000104624			5.1364 -7.08399e-05			5.11405 3.31942e-05
5.12494 8.49931e-05			5.13697 -6.6058e-05			5.11462 3.43999e-05
5.12551 9.34678e-05			5.13755 -6.12761e-05			5.1152 3.92803e-05
5.12609 0.000101943			5.13812 -6.16439e-05			5.11577 2.94621e-05
5.12666 9.98402e-05			5.13869 -6.20117e-05			5.11634 3.72822e-05
5.12723 9.77379e-05			5.13927 -7.12078e-05			5.11692 3.62832e-05
5.1278 9.56355e-05			5.13984 -6.47092e-05			5.11749 3.951e-05
5.12838 9.35332e-05			5.14041 -6.85511e-05			5.11806 4.27368e-05
5.12895 9.57663e-05			5.14099 -7.2393e-05			5.11863 4.54124e-05
5.12952 9.79995e-05			5.14156 -7.13304e-05			5.11921 4.8088e-05
5.1301 9.12627e-05			5.14213 -7.8115e-05			5.11978 4.67215e-05
5.13067 0.00011323			5.14271 -7.10851e-05			5.12035 4.53549e-05
5.13124 0.000101933			5.14328 -7.19026e-05			5.12093 4.8398e-05
5.13182 9.06366e-05			5.14385 -6.7325e-05			5.1215 5.14411e-05
5.13239 0.00010625			5.14443 -7.05947e-05			5.12207 5.2509e-05
5.13296 9.31594e-05			5.145 -7.96272e-05			5.12265 5.3577e-05
5.13354 8.02184e-05			5.14557 -7.29652e-05			5.12322 5.46449e-05
5.13411 9.59812e-05			5.14614 -7.56218e-05			5.12379 5.57129e-05
5.13468 9.38042e-05			5.14672 -7.82785e-05			5.12437 5.86181e-05
5.13526 9.16271e-05			5.14729 -8.01994e-05			5.12494 6.15234e-05
5.13583 9.43087e-05			5.14786 -8.21204e-05			5.12551 6.44286e-05
5.1364 9.69904e-05			5.14844 -8.01177e-05			5.12609 6.73339e-05
5.13697 9.2496e-05			5.14901 -7.8115e-05			5.12666 6.37167e-05
5.13755 8.80017e-05			5.14958 -7.65108e-05			5.12723 6.00995e-05
5.13812 8.57499e-05			5.15016 -7.49066e-05			5.1278 6.38315e-05
5.13869 8.34981e-05			5.15073 -7.33024e-05			5.12838 6.75636e-05
5.13927 8.84222e-05			5.1513 -6.3851e-05			5.12895 6.67023e-05
5.13984 9.33463e-05			5.15188 -5.1375e-05			5.12952 6.58411e-05
5.14041 9.26829e-05			5.15245 -3.10518e-05			5.1301 6.49798e-05
5.14099 9.20195e-05			5.15302 3.00406e-06			5.13067 6.41186e-05
5.14156 9.85321e-05			5.15359 1.09024e-05			5.13124 6.97109e-05
5.14213 0.000105045			5.15417 9.40064e-07			5.13182 7.53033e-05
5.14271 9.31688e-05			5.15474 -2.47168e-05			5.13239 7.35464e-05
5.14328 8.1293e-05			5.15531 -3.77854e-05			5.13296 7.17894e-05
5.14385 8.6161e-05			5.15589 -5.87012e-05			5.13354 7.36153e-05
5.14443 9.10291e-05			5.15646 -7.47942e-05			5.13411 7.54411e-05
5.145 9.36547e-05			5.15703 -7.51927e-05			5.13468 8.31464e-05
5.14557 9.62802e-05			5.15761 -8.67081e-05			5.13526 8.20325e-05
5.14614 9.71118e-05			5.15818 -8.25291e-05			5.13583 7.49703e-05
5.14672 9.79434e-05			5.15875 -8.96764e-05			5.1364 8.26067e-05
5.14729 0.000111781			5.15933 -8.89765e-05			5.13697 7.64631e-05
5.14786 9.69156e-05			5.1599 -8.77861e-05			5.13755 7.91387e-05
5.14844 9.81957e-05			5.16047 -8.65957e-05			5.13812 8.2733e-05
5.14901 9.94758e-05			5.16105 -8.6468e-05			5.13869 8.63272e-05
5.14958 0.000100868			5.16162 -8.63403e-05			5.13927 8.31234e-05
5.15016 0.00010226			5.16219 -8.62126e-05			5.13984 7.99196e-05
5.15073 0.000103652			5.16276 -8.60849e-05			5.14041 8.4444e-05
5.1513 0.000105045			5.16334 -8.80211e-05			5.14099 8.89684e-05
5.15188 0.000103447			5.16391 -8.99574e-05			5.14156 8.28363e-05
5.15245 0.000101849			5.16448 -8.797e-05			5.14213 8.55234e-05
5.15302 0.000109221			5.16506 -8.59827e-05			5.14271 9.62947e-05
5.15359 8.78896e-05			5.16563 -8.93903e-05			5.14328 8.6488e-05
5.15417 9.97841e-05			5.1662 -9.27979e-05			5.14385 9.37684e-05
5.15474 0.000111679			5.16678 -9.27724e-05			5.14443 9.22296e-05
5.15531 0.000105035			5.16735 -9.27469e-05			5.145 9.30335e-05
5.15589 9.83919e-05			5.16792 -8.57937e-05			5.14557 9.38373e-05
5.15646 9.6682e-05			5.1685 -8.66877e-05			5.14614 9.46411e-05
5.15703 9.49721e-05			5.16907 -8.80722e-05			5.14672 9.54449e-05
5.15761 0.000103428			5.16964 -8.16095e-05			5.14729 8.83483e-05
5.15818 0.000111884			5.17022 -7.87434e-05			5.14786 9.00708e-05
5.15875 8.51612e-05			5.17079 -8.37246e-05			5.14844 0.00010245
5.15933 0.000106278			5.17136 -7.98776e-05			5.14901 0.00010013
5.1599 0.000100485			5.17193 -8.38778e-05			5.14958 9.96363e-05
5.16047 9.46918e-05			5.17251 -8.26261e-05			5.15016 9.91426e-05
5.16105 0.000101158			5.17308 -8.92217e-05			5.15073 0.00010214
5.16162 0.000107623			5.17365 -7.99593e-05			5.1513 0.000105137
5.16219 9.25614e-05			5.17423 -7.85441e-05			5.15188 0.000105562
5.16276 0.000106203			5.1748 -8.6938e-05			5.15245 0.000105987
5.16334 9.41686e-05			5.17537 -7.96374e-05			5.15302 0.000112291
5.16391 0.000110838			5.17595 -7.72414e-05			5.15359 0.000109776
5.16448 0.000113155			5.17652 -8.26926e-05			5.15417 0.000102346
5.16506 0.000115472			5.17709 -8.29225e-05			5.15474 0.000109615
5.16563 0.000104036			5.17767 -8.31524e-05			5.15531 0.000115782
5.1662 9.25988e-05			5.17824 -7.99491e-05			5.15589 0.00010725
5.16678 0.00010269			5.17881 -7.67458e-05			5.15646 0.000115345
5.16735 0.000112781			5.17939 -7.98367e-05			5.15703 0.000114622
5.16792 0.000108137			5.17996 -8.29276e-05			5.15761 0.000113531
5.1685 0.000103494			5.18053 -8.16044e-05			5.15818 0.00011244
5.16907 9.88498e-05			5.1811 -8.02812e-05			5.15875 0.000115696
5.16964 9.42059e-05			5.18168 -8.13489e-05			5.15933 0.000118951
5.17022 0.000100326			5.18225 -7.45694e-05			5.1599 0.000122207
5.17079 0.000106446			5.18282 -8.59367e-05			5.16047 0.000125462
5.17136 0.00010539			5.1834 -8.16095e-05			5.16105 0.000123757
5.17193 0.000104335			5.18397 -7.38491e-05			5.16162 0.000122052
5.17251 0.00010354			5.18454 -8.17832e-05			5.16219 0.000128614
5.17308 0.000102746			5.18512 -7.54941e-05			5.16276 0.000120478
5.17365 0.000103746			5.18569 -7.70523e-05			5.16334 0.000121345
5.17423 0.000104746			5.18626 -7.59744e-05			5.16391 0.000122212
5.1748 9.84199e-05			5.18684 -7.48964e-05			5.16448 0.00012657
5.17537 0.000120798			5.18741 -7.38184e-05			5.16506 0.000130928
5.17595 9.89245e-05			5.18798 -7.27404e-05			5.16563 0.000125824
5.17652 0.000105755			5.18855 -7.85288e-05			5.1662 0.00012072
5.17709 0.000101214			5.18913 -7.64699e-05			5.16678 0.000128844
5.17767 9.66727e-05			5.1897 -8.11139e-05			5.16735 0.000136968
5.17824 0.000102896			5.19027 -7.00634e-05			5.16792 0.00013164
5.17881 0.000109118			5.19085 -7.2296e-05			5.1685 0.000126312
5.17939 0.000130142			5.19142 -7.45285e-05			5.16907 0.000128884
5.17996 0.000103325			5.19199 -7.18566e-05			5.16964 0.000131456
5.18053 0.000101625			5.19257 -6.91846e-05			5.17022 0.000125761
5.1811 9.99243e-05			5.19314 -6.85562e-05			5.17079 0.000128884
5.18168 0.000121471			5.19371 -6.79278e-05			5.17136 0.000124107
5.18225 0.000114314			5.19429 -6.72995e-05			5.17193 0.000134029
5.18282 9.99803e-05			5.19486 -6.66711e-05			5.17251 0.000127391
5.1834 0.000114351			5.19543 -6.43414e-05			5.17308 0.000135453
5.18397 0.000115267			5.19601 -6.20117e-05			5.17365 0.000126794
5.18454 0.000116182			5.19658 -6.36057e-05			5.17423 0.000126955
5.18512 0.000118892			5.19715 -6.51997e-05			5.1748 0.000128494
5.18569 0.000121602			5.19772 -6.58128e-05			5.17537 0.000130033
5.18626 0.000117687			5.1983 -6.64258e-05			5.17595 0.000134878
5.18684 0.000113772			5.19887 -6.31153e-05			5.17652 0.000125026
5.18741 0.000115239			5.19944 -5.98047e-05			5.17709 0.000134907
5.18798 0.000116706			5.20002 -5.93347e-05			5.17767 0.00012715
5.18855 0.000134916			5.20059 -5.88647e-05			5.17824 0.000128396
5.18913 0.000124423			5.20116 -5.83946e-05			5.17881 0.000129642
5.1897 0.000130076			5.20174 -5.79246e-05			5.17939 0.000126754
5.19027 0.000135729			5.20231 -5.81903e-05			5.17996 0.000123866
5.19085 0.000132001			5.20288 -5.8456e-05			5.18053 0.000135309
5.19142 0.000128273			5.20346 -5.87216e-05			5.1811 0.000129114
5.19199 0.000131721			5.20403 -5.89873e-05			5.18168 0.000131462
5.19257 0.000135169			5.2046 -5.78225e-05			5.18225 0.000133811
5.19314 0.000121275			5.20518 -5.66576e-05			5.18282 0.000130647
5.19371 0.000107381			5.20575 -5.54928e-05			5.1834 0.000127483
5.19429 0.000105446			5.20632 -5.4328e-05			5.18397 0.000131393
5.19486 0.000103512			5.20689 -5.52067e-05			5.18454 0.000135303
5.19543 0.000103746			5.20747 -5.60854e-05			5.18512 0.000134804
5.19601 0.000103979			5.20804 -5.04248e-05			5.18569 0.000134304
5.19658 8.80671e-05			5.20861 -4.47641e-05			5.18626 0.000134683
5.19715 0.000100859			5.20919 -4.58472e-05			5.18684 0.000135062
5.19772 0.000103036			5.20976 -4.69303e-05			5.18741 0.000135441
5.1983 0.000105213			5.21033 -4.80134e-05			5.18798 0.00013582
5.19887 9.4832e-05			5.21091 -4.90965e-05			5.18855 0.000137577
5.19944 0.000113155			5.21148 -4.5275e-05			5.18913 0.000139334
5.20002 9.52244e-05			5.21205 -4.14535e-05			5.1897 0.000136681
5.20059 0.000105998			5.21263 -4.15557e-05			5.19027 0.000134029
5.20116 0.000102419			5.2132 -4.16579e-05			5.19085 0.000132639
5.20174 9.88404e-05			5.21377 -3.92669e-05			5.19142 0.00013125
5.20231 0.00010483			5.21435 -3.6876e-05			5.19199 0.00013427
5.20288 0.000110819			5.21492 -4.33132e-05			5.19257 0.00013729
5.20346 0.000104848			5.21549 -3.40559e-05			5.19314 0.000130756
5.20403 9.88778e-05			5.21606 -3.2891e-05			5.19371 0.000124222
5.2046 0.000106493			5.21664 -3.17262e-05			5.19429 0.000134959
5.20518 0.000114108			5.21721 -3.35041e-05			5.19486 0.000128057
5.20575 0.000109763			5.21778 -3.5282e-05			5.19543 0.000132679
5.20632 0.000105418			5.21836 -3.16036e-05			5.19601 0.000137301
5.20689 0.000100775			5.21893 -2.79252e-05			5.19658 0.000134574
5.20747 9.61307e-05			5.2195 -2.91513e-05			5.19715 0.000131847
5.20804 9.86629e-05			5.22008 -3.03775e-05			5.19772 0.000123332
5.20861 0.000101195			5.22065 -2.33476e-05			5.1983 0.000132456
5.20919 0.000103204			5.22122 -3.20123e-05			5.19887 0.000131657
5.20976 0.000105213			5.2218 -3.13584e-05			5.19944 0.000130859
5.21033 0.000100046			5.22237 -3.85517e-05			5.20002 0.000132771
5.21091 9.48787e-05			5.22294 -3.67534e-05			5.20059 0.000134683
5.21148 9.79341e-05			5.22351 -3.4955e-05			5.20116 0.000129246
5.21205 0.000100989			5.22409 -3.36472e-05			5.20174 0.000123809
5.21263 9.20849e-05			5.22466 -3.23393e-05			5.20231 0.000128017
5.2132 8.31804e-05			5.22523 -3.15219e-05			5.20288 0.000132226
5.21377 8.62918e-05			5.22581 -3.07044e-05			5.20346 0.000129085
5.21435 8.94033e-05			5.22638 -2.9887e-05			5.20403 0.000125944
5.21492 9.07207e-05			5.22695 -2.90696e-05			5.2046 0.000124033
5.21549 9.20382e-05			5.22753 -2.59429e-05			5.20518 0.000122121
5.21606 9.97841e-05			5.2281 -2.28163e-05			5.20575 0.000124618
5.21664 7.88262e-05			5.22867 -2.36133e-05			5.20632 0.000127116
5.21721 8.11902e-05			5.22925 -2.44103e-05			5.20689 0.000126398
5.21778 8.35541e-05			5.22982 -2.34907e-05			5.20747 0.00012568
5.21836 7.94522e-05			5.23039 -2.25711e-05			5.20804 0.000124963
5.21893 7.53504e-05			5.23097 -1.51121e-05			5.20861 0.000124245
5.2195 7.66305e-05			5.23154 -7.6531e-06			5.20919 0.000126008
5.22008 7.79105e-05			5.23211 -9.58937e-06			5.20976 0.00012777
5.22065 8.99546e-05			5.23268 -1.15256e-05			5.21033 0.000125123
5.22122 7.32948e-05			5.23326 -9.53828e-06			5.21091 0.000122477
5.2218 8.89268e-05			5.23383 -7.55092e-06			5.21148 0.000123229
5.22237 7.58549e-05			5.2344 -5.07311e-06			5.21205 0.000123981
5.22294 7.84618e-05			5.23498 -2.59529e-06			5.21263 0.000130245
5.22351 8.10687e-05			5.23555 -1.17477e-07			5.2132 0.000118871
5.22409 8.18816e-05			5.23612 2.36034e-06			5.21377 0.000124233
5.22466 8.26945e-05			5.2367 4.16378e-06			5.21435 0.000129596
5.22523 8.53014e-05			5.23727 5.96722e-06			5.21492 0.000126507
5.22581 8.79083e-05			5.23784 7.77066e-06			5.21549 0.000123418
5.22638 7.85553e-05			5.23842 9.5741e-06			5.21606 0.000123085
5.22695 6.92022e-05			5.23899 8.68004e-06			5.21664 0.000122752
5.22753 6.69504e-05			5.23956 7.78598e-06			5.21721 0.000122419
5.2281 6.46986e-05			5.24014 1.49693e-06			5.21778 0.000122086
5.22867 6.96227e-05			5.24071 3.05515e-06			5.21836 0.000120214
5.22925 7.45468e-05			5.24128 1.09893e-05			5.21893 0.000118343
5.22982 7.39395e-05			5.24185 3.22885e-06			5.2195 0.000116471
5.23039 7.33321e-05			5.24243 4.29661e-06			5.22008 0.000114599
5.23097 7.27248e-05			5.243 -2.4829e-06			5.22065 0.000114932
5.23154 7.21175e-05			5.24357 7.41303e-06			5.22122 0.000115265
5.23211 7.79479e-05			5.24415 1.61444e-06			5.2218 0.000105677
5.23268 8.37784e-05			5.24472 2.29928e-07			5.22237 0.000113726
5.23326 7.76489e-05			5.24529 -1.15458e-06			5.22294 0.000114128
5.23383 7.15195e-05			5.24587 -1.07259e-07			5.22351 0.00011453
5.2344 7.43599e-05			5.24644 9.40064e-07			5.22409 0.000116034
5.23498 7.72004e-05			5.24701 1.98739e-06			5.22466 0.000117539
5.23555 7.28649e-05			5.24759 3.03471e-06			5.22523 0.000112337
5.23612 6.85295e-05			5.24816 2.44719e-06			5.22581 0.000107135
5.2367 6.65112e-05			5.24873 1.85967e-06			5.22638 0.000109282
5.23727 6.4493e-05			5.24931 7.81153e-06			5.22695 0.00011143
5.23784 7.86207e-05			5.24988 1.37634e-05			5.22753 0.00011089
5.23842 6.40445e-05			5.25045 1.48976e-05			5.2281 0.00011035
5.23899 6.47172e-05			5.25102 1.60317e-05			5.22867 0.000109811
5.23956 6.539e-05			5.2516 1.71659e-05			5.22925 0.000109271
5.24014 6.42687e-05			5.25217 1.83001e-05			5.22982 0.000108915
5.24071 6.31475e-05			5.25274 2.30309e-05			5.23039 0.000108559
5.24128 6.66794e-05			5.25332 2.77618e-05			5.23097 0.000108203
5.24185 7.02113e-05			5.25389 2.8569e-05			5.23154 0.000107847
5.24243 6.65673e-05			5.25446 2.93762e-05			5.23211 0.000109977
5.243 6.29233e-05			5.25504 3.15526e-05			5.23268 0.000112107
5.24357 6.10732e-05			5.25561 3.3729e-05			5.23326 0.000109828
5.24415 5.92232e-05			5.25618 3.59053e-05			5.23383 0.000107548
5.24472 5.73731e-05			5.25676 3.80817e-05			5.2344 0.000109127
5.24529 5.5523e-05			5.25733 3.78059e-05			5.23498 0.000110706
5.24587 4.92628e-05			5.2579 3.753e-05			5.23555 0.000107876
5.24644 4.30025e-05			5.25847 4.01968e-05			5.23612 0.000105045
5.24701 4.87022e-05			5.25905 4.28637e-05			5.2367 0.000105223
5.24759 5.44018e-05			5.25962 4.96789e-05			5.23727 0.000105401
5.24816 5.3374e-05			5.26019 4.07997e-05			5.23784 9.56574e-05
5.24873 5.23462e-05			5.26077 4.07486e-05			5.23842 0.000103552
5.24931 5.13184e-05			5.26134 4.06975e-05			5.23899 0.000100974
5.24988 5.02906e-05			5.26191 4.36709e-05			5.23956 9.83961e-05
5.25045 4.63195e-05			5.26249 4.66442e-05			5.24014 9.69205e-05
5.25102 4.23484e-05			5.26306 5.35413e-05			5.24071 9.54449e-05
5.2516 3.83774e-05			5.26363 4.47437e-05			5.24128 9.74603e-05
5.25217 3.44063e-05			5.26421 5.15386e-05			5.24185 9.94756e-05
5.25274 3.70132e-05			5.26478 4.26389e-05			5.24243 9.70813e-05
5.25332 3.96201e-05			5.26535 4.55101e-05			5.243 9.4687e-05
5.25389 3.5051e-05			5.26593 4.83813e-05			5.24357 9.8356e-05
5.25446 3.0482e-05			5.2665 4.90454e-05			5.24415 0.000102025
5.25504 3.38737e-05			5.26707 4.97096e-05			5.24472 9.13626e-05
5.25561 3.72655e-05			5.26764 5.03737e-05			5.24529 9.83387e-05
5.25618 4.78332e-05			5.26822 5.10379e-05			5.24587 9.74603e-05
5.25676 2.96971e-05			5.26879 5.14262e-05			5.24644 9.65818e-05
5.25733 4.56468e-05			5.26936 5.18144e-05			5.24701 9.68057e-05
5.2579 3.28926e-05			5.26994 5.61264e-05			5.24759 9.70296e-05
5.25847 3.62844e-05			5.27051 6.04383e-05			5.24816 9.23847e-05
5.25905 3.96761e-05			5.27108 5.97639e-05			5.24873 8.77397e-05
5.25962 2.13905e-05			5.27166 5.90895e-05			5.24931 8.75043e-05
5.26019 3.18088e-05			5.27223 6.33197e-05			5.24988 8.72689e-05
5.26077 3.4154e-05			5.2728 5.18553e-05			5.25045 9.02086e-05
5.26134 2.21474e-05			5.27338 5.7189e-05			5.25102 9.31483e-05
5.26191 3.63031e-05			5.27395 6.25227e-05			5.2516 9.0576e-05
5.26249 5.04588e-05			5.27452 6.03361e-05			5.25217 8.80038e-05
5.26306 4.21896e-05			5.2751 5.81495e-05			5.25274 9.14028e-05
5.26363 3.39204e-05			5.27567 6.13579e-05			5.25332 7.71636e-05
5.26421 3.14817e-05			5.27624 6.45663e-05			5.25389 8.01952e-05
5.26478 2.9043e-05			5.27681 6.28701e-05			5.25446 8.32268e-05
5.26535 2.75013e-05			5.27739 6.11739e-05			5.25504 8.2354e-05
5.26593 2.59596e-05			5.27796 7.28018e-05			5.25561 8.14813e-05
5.2665 2.54644e-05			5.27853 6.87351e-05			5.25618 7.95062e-05
5.26707 3.93211e-05			5.27911 6.9573e-05			5.25676 7.75311e-05
5.26764 2.268e-05			5.27968 7.04108e-05			5.25733 8.34564e-05
5.26822 3.47427e-05			5.28025 6.85512e-05			5.2579 7.17435e-05
5.26879 2.15961e-05			5.28083 6.66916e-05			5.25847 7.43617e-05
5.26936 2.28014e-05			5.2814 7.13713e-05			5.25905 7.69799e-05
5.26994 2.49038e-05			5.28197 7.6051e-05			5.25962 7.70602e-05
5.27051 2.70061e-05			5.28255 7.71137e-05			5.26019 7.71406e-05
5.27108 2.22315e-05			5.28312 7.81763e-05			5.26077 7.83234e-05
5.27166 1.74568e-05			5.28369 7.9239e-05			5.26134 7.95062e-05
5.27223 3.42101e-05			5.28427 8.03016e-05			5.26191 7.16861e-05
5.2728 5.09633e-05			5.28484 8.34079e-05			5.26249 8.15043e-05
5.27338 4.03956e-05			5.28541 8.65141e-05			5.26306 7.25818e-05
5.27395 2.98279e-05			5.28598 8.56966e-05			5.26363 8.12976e-05
5.27452 3.60041e-05			5.28656 8.48792e-05			5.26421 7.52689e-05
5.2751 4.21803e-05			5.28713 8.17321e-05			5.26478 8.68784e-05
5.27567 3.22105e-05			5.2877 7.85851e-05			5.26535 8.23196e-05
5.27624 2.22408e-05			5.28828 8.19774e-05			5.26593 7.77607e-05
5.27681 2.4231e-05			5.28885 8.53697e-05			5.2665 7.77952e-05
5.27739 2.62212e-05			5.28942 8.8762e-05			5.26707 7.78296e-05
5.27796 1.92415e-05			5.29 9.21543e-05			5.26764 8.22736e-05
5.27853 1.22618e-05			5.29057 8.80263e-05			5.26822 8.67177e-05
5.27911 1.2458e-05			5.29114 8.38983e-05			5.26879 8.39789e-05
5.27968 1.26542e-05			5.29172 9.15208e-05			5.26936 8.12401e-05
5.28025 1.00099e-05			5.29229 8.34487e-05			5.26994 7.85014e-05
5.28083 7.36566e-06			5.29286 8.81285e-05			5.27051 7.57626e-05
5.2814 4.72139e-06			5.29344 9.28082e-05			5.27108 7.55043e-05
5.28197 2.07713e-06			5.29401 9.16025e-05			5.27166 7.52459e-05
5.28255 -1.42676e-06			5.29458 9.03968e-05			5.27223 8.04995e-05
5.28312 -4.93064e-06			5.29515 8.91911e-05			5.2728 6.81148e-05
5.28369 -3.61579e-07			5.29573 8.79854e-05			5.27338 7.1554e-05
5.28427 4.20749e-06			5.2963 9.07136e-05			5.27395 7.49933e-05
5.28484 -8.71484e-06			5.29687 9.34417e-05			5.27452 7.29205e-05
5.28541 -7.28525e-06			5.29745 9.61699e-05			5.2751 7.08478e-05
5.28598 -1.81146e-05			5.29802 9.8898e-05			5.27567 6.73052e-05
5.28656 -2.40111e-07			5.29859 9.67216e-05			5.27624 6.37626e-05
5.28713 -8.61466e-07			5.29917 9.45452e-05			5.27681 6.64669e-05
5.2877 -1.48282e-06			5.29974 9.62925e-05			5.27739 6.91712e-05
5.28828 -7.48614e-06			5.30031 9.80397e-05			5.27796 7.29779e-05
5.28885 -1.34895e-05			5.30089 9.77843e-05			5.27853 5.91463e-05
5.28942 -1.54563e-05			5.30146 9.75288e-05			5.27911 6.25856e-05
5.29 -1.74232e-05			5.30203 0.000110025			5.27968 6.60248e-05
5.29057 -1.939e-05			5.3026 0.000106827			5.28025 6.51463e-05
5.29114 -2.13569e-05			5.30318 0.000106899			5.28083 6.42679e-05
5.29172 -1.5475e-05			5.30375 0.00010697			5.2814 6.33894e-05
5.29229 -9.59315e-06			5.30432 0.000106061			5.28197 6.25109e-05
5.29286 -3.18171e-05			5.3049 0.000105151			5.28255 6.79023e-05
5.29344 -2.53373e-05			5.30547 0.000106621			5.28312 7.32937e-05
5.29401 -2.60334e-05			5.30604 0.000108091			5.28369 6.83961e-05
5.29458 -2.67295e-05			5.30662 0.000109562			5.28427 6.34985e-05
5.29515 -2.74256e-05			5.30719 0.000111032			5.28484 6.13569e-05
5.29573 -2.81217e-05			5.30776 0.000113891			5.28541 5.92152e-05
5.2963 -1.82034e-05			5.30834 0.000116751			5.28598 6.44229e-05
5.29687 -3.69889e-05			5.30891 0.000114052			5.28656 6.96306e-05
5.29745 -1.54096e-05			5.30948 0.000111354			5.28713 6.63464e-05
5.29802 -2.25342e-05			5.31006 0.000105303			5.2877 6.30621e-05
5.29859 -2.83132e-05			5.31063 0.000114948			5.28828 5.97779e-05
5.29917 -1.97404e-05			5.3112 0.000115764			5.28885 5.64937e-05
5.29974 -2.82105e-05			5.31177 0.00011658			5.28942 6.01913e-05
5.30031 -2.23286e-05			5.31235 0.000115026			5.29 6.38889e-05
5.30089 -3.18078e-05			5.31292 0.000113471			5.29057 6.3177e-05
5.30146 -2.6935e-05			5.31349 0.000111917			5.29114 6.2465e-05
5.30203 -3.55172e-05			5.31407 0.000110362			5.29172 6.46928e-05
5.3026 -2.97475e-05			5.31464 0.000111393			5.29229 6.69205e-05
5.30318 -4.43096e-05			5.31521 0.000112424			5.29286 5.92267e-05
5.30375 -3.0168e-05			5.31579 0.000113455			5.29344 6.91712e-05
5.30432 -3.12752e-05			5.31636 0.000114485			5.29401 6.39578e-05
5.3049 -3.23824e-05			5.31693 0.000117151			5.29458 5.87444e-05
5.30547 -3.24198e-05			5.31751 0.000119816			5.29515 6.19827e-05
5.30604 -3.24572e-05			5.31808 0.000115943			5.29573 6.5221e-05
5.30662 -3.24945e-05			5.31865 0.000112069			5.2963 6.32918e-05
5.30719 -3.25319e-05			5.31923 0.000117064			5.29687 6.13626e-05
5.30776 -3.43633e-05			5.3198 0.000122059			5.29745 6.3843e-05
5.30834 -3.61946e-05			5.32037 0.000120515			5.29802 6.63234e-05
5.30891 -2.36741e-05			5.32094 0.000118971			5.29859 6.59559e-05
5.30948 -3.98574e-05			5.32152 0.000122822			5.29917 6.55885e-05
5.31006 -2.30387e-05			5.32209 0.000126673			5.29974 6.5221e-05
5.31063 -3.49239e-05			5.32266 0.000123984			5.30031 6.48535e-05
5.3112 -2.43842e-05			5.32324 0.000121295			5.30089 6.10181e-05
5.31177 -2.81964e-05			5.32381 0.000128274			5.30146 5.71827e-05
5.31235 -3.11117e-05			5.32438 0.000135253			5.30203 5.88593e-05
5.31292 -3.40269e-05			5.32496 0.000134057			5.3026 6.05358e-05
5.31349 -3.96331e-05			5.32553 0.000132862			5.30318 5.33932e-05
5.31407 -4.52393e-05			5.3261 0.00012807			5.30375 6.38889e-05
5.31464 -2.9598e-05			5.32668 0.000138972			5.30432 6.00535e-05
5.31521 -4.26605e-05			5.32725 0.000134507			5.3049 5.62181e-05
5.31579 -3.86801e-05			5.32782 0.000130042			5.30547 5.61779e-05
5.31636 -3.46996e-05			5.3284 0.000131973			5.30604 5.61377e-05
5.31693 -4.05862e-05			5.32897 0.000133904			5.30662 5.49951e-05
5.31751 -3.21208e-05			5.32954 0.000132893			5.30719 5.38526e-05
5.31808 -4.78743e-05			5.33011 0.000131881			5.30776 6.20803e-05
5.31865 -3.49239e-05			5.33069 0.000124821			5.30834 5.26698e-05
5.31923 -3.73346e-05			5.33126 0.000133455			5.30891 5.31808e-05
5.3198 -3.97452e-05			5.33183 0.000138165			5.30948 5.36918e-05
5.32037 -4.21559e-05			5.33241 0.000127181			5.31006 5.56956e-05
5.32094 -4.45666e-05			5.33298 0.000130675			5.31063 5.76995e-05
5.32152 -2.67949e-05			5.33355 0.00013417			5.3112 4.53722e-05
5.32209 -3.7727e-05			5.33413 0.00013276			5.31177 5.06832e-05
5.32266 -3.96892e-05			5.3347 0.00013135			5.31235 4.62564e-05
5.32324 -4.16514e-05			5.33527 0.000133945			5.31292 4.18296e-05
5.32381 -4.66175e-05			5.33585 0.00013654			5.31349 4.58545e-05
5.32438 -5.15837e-05			5.33642 0.000131615			5.31407 4.98794e-05
5.32496 -2.964e-05			5.33699 0.00012669			5.31464 4.91731e-05
5.32553 -5.55361e-05			5.33756 0.000136806			5.31521 4.84669e-05
5.3261 -5.31768e-05			5.33814 0.000131227			5.31579 4.77607e-05
5.32668 -5.08175e-05			5.33871 0.000125648			5.31636 4.70545e-05
5.32725 -5.32422e-05			5.33928 0.000135764			5.31693 4.58889e-05
5.32782 -5.56669e-05			5.33986 0.000135662			5.31751 4.47234e-05
5.3284 -4.14598e-05			5.34043 0.000135559			5.31808 4.79674e-05
5.32897 -5.59566e-05			5.341 0.000135457			5.31865 5.12114e-05
5.32954 -5.43074e-05			5.34158 0.000135355			5.31923 4.61875e-05
5.33011 -5.26582e-05			5.34215 0.000142943			5.3198 4.11636e-05
5.33069 -4.95141e-05			5.34272 0.000134837			5.32037 4.34889e-05
5.33126 -4.63699e-05			5.3433 0.000135558			5.32094 4.58143e-05
5.33183 -6.65476e-05			5.34387 0.00013628			5.32152 4.80478e-05
5.33241 -5.80215e-05			5.34444 0.000139208			5.32209 5.02813e-05
5.33298 -6.20813e-05			5.34502 0.000142137			5.32266 5.25148e-05
5.33355 -6.61412e-05			5.34559 0.000141142			5.32324 5.47483e-05
5.33413 -6.12311e-05			5.34616 0.000140147			5.32381 5.51272e-05
5.3347 -5.6321e-05			5.34673 0.000139827			5.32438 5.55062e-05
5.33527 -5.96333e-05			5.34731 0.000139506			5.32496 5.14755e-05
5.33585 -6.29456e-05			5.34788 0.000148014			5.32553 4.74449e-05
5.33642 -6.6258e-05			5.34845 0.000140827			5.3261 5.03042e-05
5.33699 -6.95703e-05			5.34903 0.000142631			5.32668 5.31636e-05
5.33756 -6.18571e-05			5.3496 0.000144436			5.32725 4.61014e-05
5.33814 -5.41439e-05			5.35017 0.00014526			5.32782 5.66774e-05
5.33871 -5.83906e-05			5.35075 0.000146084			5.3284 5.28076e-05
5.33928 -6.26373e-05			5.35132 0.000142769			5.32897 4.89377e-05
5.33986 -6.07545e-05			5.35189 0.000139455			5.32954 5.60918e-05
5.34043 -5.88718e-05			5.35247 0.000133852			5.33011 4.56076e-05
5.341 -6.4165e-05			5.35304 0.000143943			5.33069 4.50449e-05
5.34158 -6.94582e-05			5.35361 0.000141528			5.33126 4.44822e-05
5.34215 -6.64869e-05			5.35419 0.000139113			5.33183 4.28171e-05
5.34272 -6.35156e-05			5.35476 0.000137678			5.33241 4.11521e-05
5.3433 -5.15744e-05			5.35533 0.000136244			5.33298 4.23119e-05
5.34387 -6.83369e-05			5.3559 0.000137936			5.33355 4.34717e-05
5.34444 -6.53657e-05			5.35648 0.000139629			5.33413 4.46315e-05
5.34502 -6.23944e-05			5.35705 0.00014034			5.3347 4.57913e-05
5.34559 -6.3011e-05			5.35762 0.000141052			5.33527 4.2909e-05
5.34616 -6.36277e-05			5.3582 0.000147894			5.33585 4.00267e-05
5.34673 -5.2733e-05			5.35877 0.000139041			5.33642 3.71444e-05
5.34731 -7.05421e-05			5.35934 0.000136728			5.33699 3.42621e-05
5.34788 -5.60593e-05			5.35992 0.00015011			5.33756 3.45033e-05
5.34845 -7.02804e-05			5.36049 0.00015036			5.33814 3.47444e-05
5.34903 -6.61131e-05			5.36106 0.00015061			5.33871 3.49856e-05
5.3496 -6.19459e-05			5.36164 0.000151842			5.33928 3.52267e-05
5.35017 -6.67485e-05			5.36221 0.000153073			5.33986 3.50085e-05
5.35075 -7.15512e-05			5.36278 0.000151443			5.34043 3.47903e-05
5.35132 -6.98787e-05			5.36336 0.000149813			5.341 3.45722e-05
5.35189 -6.82061e-05			5.36393 0.000143279			5.34158 3.4354e-05
5.35247 -6.47396e-05			5.3645 0.000152439			5.34215 3.80631e-05
5.35304 -6.12731e-05			5.36507 0.000149072			5.34272 4.17722e-05
5.35361 -7.7391e-05			5.36565 0.000145706			5.3433 4.69511e-05
5.35419 -6.4805e-05			5.36622 0.000147244			5.34387 3.44918e-05
5.35476 -6.8365e-05			5.36679 0.000148781			5.34444 4.44478e-05
5.35533 -7.19249e-05			5.36737 0.00014615			5.34502 3.67655e-05
5.3559 -7.38404e-05			5.36794 0.000143519			5.34559 3.90047e-05
5.35648 -7.57558e-05			5.36851 0.000144812			5.34616 4.12439e-05
5.35705 -7.76713e-05			5.36909 0.000146104			5.34673 3.56286e-05
5.35762 -7.95868e-05			5.36966 0.000146227			5.34731 4.76516e-05
5.3582 -7.70172e-05			5.37023 0.000146349			5.34788 4.24037e-05
5.35877 -7.44477e-05			5.37081 0.000146472			5.34845 3.71559e-05
5.35934 -8.56321e-05			5.37138 0.000146595			5.34903 3.71444e-05
5.35992 -9.68165e-05			5.37195 0.00014917			5.3496 3.71329e-05
5.36049 -7.54872e-05			5.37252 0.000151744			5.35017 3.71214e-05
5.36106 -8.28617e-05			5.3731 0.000150396			5.35075 3.711e-05
5.36164 -9.74122e-05			5.37367 0.000149047			5.35132 3.81951e-05
5.36221 -8.32588e-05			5.37424 0.00014917			5.35189 3.92803e-05
5.36278 -7.92714e-05			5.37482 0.000149292			5.35247 3.92631e-05
5.36336 -7.5284e-05			5.37539 0.000149415			5.35304 3.92458e-05
5.36393 -7.66785e-05			5.37596 0.000149537			5.35361 4.67616e-05
5.3645 -7.80731e-05			5.37654 0.000150641			5.35419 3.66391e-05
5.36507 -8.05889e-05			5.37711 0.000151744			5.35476 4.19502e-05
5.36565 -8.31046e-05			5.37768 0.000152848			5.35533 2.96229e-05
5.36622 -7.66505e-05			5.37826 0.000153951			5.3559 3.39234e-05
5.36679 -7.01963e-05			5.37883 0.000150483			5.35648 3.82238e-05
5.36737 -8.9157e-05			5.3794 0.000147014			5.35705 3.5175e-05
5.36794 -7.94139e-05			5.37998 0.000156296			5.35762 3.21262e-05
5.36851 -7.86407e-05			5.38055 0.000149885			5.3582 2.54946e-05
5.36909 -7.78675e-05			5.38112 0.000153282			5.35877 3.65013e-05
5.36966 -7.13386e-05			5.38169 0.00015668			5.35934 3.31769e-05
5.37023 -6.48097e-05			5.38227 0.000156153			5.35992 2.98525e-05
5.37081 -7.02407e-05			5.38284 0.000155627			5.36049 3.05243e-05
5.37138 -7.56717e-05			5.38341 0.000148132			5.36106 3.11961e-05
5.37195 -7.75148e-05			5.38399 0.000156332			5.36164 3.18679e-05
5.37252 -7.93578e-05			5.38456 0.000155704			5.36221 3.25396e-05
5.3731 -6.6849e-05			5.38513 0.000155075			5.36278 3.31195e-05
5.37367 -8.30439e-05			5.38571 0.000155183			5.36336 3.36994e-05
5.37424 -6.74329e-05			5.38628 0.00015529			5.36393 2.98698e-05
5.37482 -8.05258e-05			5.38685 0.000155397			5.3645 2.60401e-05
5.37539 -7.92667e-05			5.38743 0.000155505			5.36507 2.96975e-05
5.37596 -7.80077e-05			5.388 0.00015624			5.36565 3.33549e-05
5.37654 -7.55526e-05			5.38857 0.000156976			5.36622 2.96631e-05
5.37711 -7.30976e-05			5.38915 0.000157712			5.36679 2.59712e-05
5.37768 -8.26024e-05			5.38972 0.000158447			5.36737 2.72401e-05
5.37826 -9.21073e-05			5.39029 0.000156567			5.36794 2.8509e-05
5.37883 -8.27075e-05			5.39086 0.000154687			5.36851 3.52899e-05
5.3794 -7.33078e-05			5.39144 0.000161635			5.36909 2.44324e-05
5.37998 -7.5868e-05			5.39201 0.000152889			5.36966 2.67406e-05
5.38055 -7.84281e-05			5.39258 0.000153951			5.37023 2.90487e-05
5.38112 -8.20348e-05			5.39316 0.000155014			5.37081 2.58449e-05
5.38169 -8.56415e-05			5.39373 0.000155096			5.37138 2.2641e-05
5.38227 -8.20722e-05			5.3943 0.000155178			5.37195 2.7154e-05
5.38284 -7.85029e-05			5.39488 0.000155259			5.37252 3.16669e-05
5.38341 -8.27075e-05			5.39545 0.000155341			5.3731 2.88305e-05
5.38399 -8.69122e-05			5.39602 0.000154605			5.37367 2.59942e-05
5.38456 -7.4971e-05			5.3966 0.00015387			5.37424 2.92899e-05
5.38513 -9.17335e-05			5.39717 0.000160976			5.37482 3.25856e-05
5.38571 -8.53238e-05			5.39774 0.000155004			5.37539 2.74296e-05
5.38628 -7.8914e-05			5.39832 0.000155898			5.37596 2.22736e-05
5.38685 -7.42982e-05			5.39889 0.000156792			5.37654 3.2643e-05
5.38743 -6.96824e-05			5.39946 0.000160956			5.37711 2.53741e-05
5.388 -7.18315e-05			5.40003 0.000157272			5.37768 3.0599e-05
5.38857 -7.39805e-05			5.40061 0.000157022			5.37826 1.81855e-05
5.38915 -7.61296e-05			5.40118 0.000164619			5.37883 2.03674e-05
5.38972 -7.82786e-05			5.40175 0.000163428			5.3794 2.25492e-05
5.39029 -8.04277e-05			5.40233 0.000154391			5.37998 2.36286e-05
5.39086 -8.25767e-05			5.4029 0.000161211			5.38055 2.4708e-05
5.39144 -6.85799e-05			5.40347 0.000160184			5.38112 1.96324e-05
5.39201 -8.32869e-05			5.40405 0.000161691			5.38169 1.45568e-05
5.39258 -8.21095e-05			5.40462 0.000163199			5.38227 1.68305e-05
5.39316 -8.09322e-05			5.40519 0.00015506			5.38284 1.91042e-05
5.39373 -7.97549e-05			5.40577 0.00016			5.38341 2.37434e-05
5.3943 -7.85776e-05			5.40634 0.000171654			5.38399 2.83827e-05
5.39488 -8.50248e-05			5.40691 0.000154534			5.38456 2.56726e-05
5.39545 -6.27681e-05			5.40748 0.00015834			5.38513 2.29626e-05
5.39602 -6.86173e-05			5.40806 0.000162146			5.38571 2.09875e-05
5.3966 -7.44664e-05			5.40863 0.000159331			5.38628 1.90123e-05
5.39717 -7.28476e-05			5.4092 0.000156516			5.38685 2.14468e-05
5.39774 -7.12288e-05			5.40978 0.000157134			5.38743 2.38812e-05
5.39832 -6.961e-05			5.41035 0.000157752			5.388 2.62353e-05
5.39889 -6.79912e-05			5.41092 0.00016585			5.38857 2.85894e-05
5.39946 -6.80169e-05			5.4115 0.0001661			5.38915 2.54315e-05
5.40003 -6.80426e-05			5.41207 0.000163735			5.38972 2.22736e-05
5.40061 -5.82014e-05			5.41264 0.00016137			5.39029 3.59272e-05
5.40118 -6.2712e-05			5.41322 0.000165217			5.39086 3.19425e-05
5.40175 -7.67907e-05			5.41379 0.000161216			5.39144 3.05301e-05
5.40233 -6.21654e-05			5.41436 0.000160649			5.39201 2.91176e-05
5.4029 -7.08621e-05			5.41494 0.000152235			5.39258 3.00937e-05
5.40347 -6.52068e-05			5.41551 0.000163499			5.39316 3.10698e-05
5.40405 -8.01824e-05			5.41608 0.000151221			5.39373 3.20458e-05
5.40462 -6.64542e-05			5.41665 0.000151695			5.3943 3.30219e-05
5.40519 -6.88719e-05			5.41723 0.000160016			5.39488 3.21607e-05
5.40577 -7.12895e-05			5.4178 0.000155585			5.39545 3.12994e-05
5.40634 -6.7802e-05			5.41837 0.000159002			5.39602 3.15406e-05
5.40691 -7.86664e-05			5.41895 0.000158495			5.3966 3.17817e-05
5.40748 -6.62089e-05			5.41952 0.000157988			5.39717 2.45817e-05
5.40806 -8.24553e-05			5.42009 0.000158788			5.39774 3.502e-05
5.40863 -7.46323e-05			5.42067 0.000159589			5.39832 3.11272e-05
5.4092 -8.11612e-05			5.42124 0.000155976			5.39889 2.72344e-05
5.40978 -8.14111e-05			5.42181 0.00016021			5.39946 2.69243e-05
5.41035 -8.1661e-05			5.42239 0.000161501			5.40003 2.66143e-05
5.41092 -8.38919e-05			5.42296 0.000162792			5.40061 2.63042e-05
5.4115 -8.61227e-05			5.42353 0.000165065			5.40118 2.59942e-05
5.41207 -7.54966e-05			5.42411 0.00015949			5.40175 2.53396e-05
5.41264 -6.48704e-05			5.42468 0.000161843			5.40233 2.46851e-05
5.41322 -8.32471e-05			5.42525 0.000164197			5.4029 2.40305e-05
5.41379 -8.72719e-05			5.42582 0.00015429			5.40347 2.3376e-05
5.41436 -6.64799e-05			5.4264 0.000157461			5.40405 2.35482e-05
5.41494 -7.43917e-05			5.42697 0.000160878			5.40462 2.37205e-05
5.41551 -7.64566e-05			5.42754 0.000156447			5.40519 1.39712e-05
5.41608 -7.85216e-05			5.42812 0.000158065			5.40577 2.18602e-05
5.41665 -6.62346e-05			5.42869 0.000159684			5.40634 2.43865e-05
5.41723 -8.26515e-05			5.42926 0.000150328			5.40691 2.69128e-05
5.4178 -7.3803e-05			5.42984 0.000154051			5.40748 2.6132e-05
5.41837 -6.49545e-05			5.43041 0.000154341			5.40806 2.53511e-05
5.41895 -6.986e-05			5.43098 0.000154631			5.40863 2.50296e-05
5.41952 -7.47654e-05			5.43156 0.000158845			5.4092 2.4708e-05
5.42009 -7.16353e-05			5.43213 0.000163058			5.40978 2.87961e-05
5.42067 -6.85051e-05			5.4327 0.000160732			5.41035 3.28841e-05
5.42124 -7.2551e-05			5.43328 0.000158406			5.41092 2.9531e-05
5.42181 -7.65968e-05			5.43385 0.000157574			5.4115 2.61779e-05
5.42239 -7.31676e-05			5.43442 0.000156741			5.41207 3.01741e-05
5.42296 -6.97385e-05			5.43499 0.000155091			5.41264 3.41702e-05
5.42353 -7.97643e-05			5.43557 0.000153441			5.41322 3.54104e-05
5.42411 -7.54382e-05			5.43614 0.000159311			5.41379 3.66506e-05
5.42468 -8.3072e-05			5.43671 0.000152102			5.41436 2.74181e-05
5.42525 -6.20019e-05			5.43729 0.000158463			5.41494 3.58238e-05
5.42582 -6.81407e-05			5.43786 0.000151744			5.41551 3.84592e-05
5.4264 -7.42795e-05			5.43843 0.000157574			5.41608 3.22755e-05
5.42697 -6.86079e-05			5.43901 0.000145093			5.41665 3.21549e-05
5.42754 -6.29363e-05			5.43958 0.000152557			5.41723 3.20344e-05
5.42812 -7.01216e-05			5.44015 0.000152174			5.4178 3.13626e-05
5.42869 -7.73069e-05			5.44073 0.000156531			5.41837 3.06908e-05
5.42926 -7.03272e-05			5.4413 0.000153042			5.41895 3.0019e-05
5.42984 -7.76993e-05			5.44187 0.00015789			5.41952 2.93473e-05
5.43041 -6.08526e-05			5.44244 0.000154892			5.42009 2.93875e-05
5.43098 -7.27098e-05			5.44302 0.000153645			5.42067 2.94277e-05
5.43156 -7.2308e-05			5.44359 0.000152398			5.42124 2.94679e-05
5.43213 -7.19062e-05			5.44416 0.000150661			5.42181 2.9508e-05
5.4327 -7.32984e-05			5.44474 0.000156772			5.42239 2.98238e-05
5.43328 -7.46907e-05			5.44531 0.000152582			5.42296 3.01396e-05
5.43385 -7.17474e-05			5.44588 0.00015624			5.42353 3.04554e-05
5.43442 -6.88041e-05			5.44646 0.000159898			5.42411 3.07712e-05
5.43499 -7.30368e-05			5.44703 0.000155709			5.42468 2.6798e-05
5.43557 -7.72695e-05			5.4476 0.000156281			5.42525 2.28248e-05
5.43614 -7.16353e-05			5.44818 0.000149006			5.42582 2.71195e-05
5.43671 -6.6001e-05			5.44875 0.000157426			5.4264 2.25951e-05
5.43729 -6.75427e-05			5.44932 0.000152766			5.42697 3.00133e-05
5.43786 -6.90844e-05			5.4499 0.000148352			5.42754 1.97932e-05
5.43843 -6.37492e-05			5.45047 0.000151785			5.42812 2.72114e-05
5.43901 -5.84139e-05			5.45104 0.000149987			5.42869 2.58104e-05
5.43958 -6.92246e-05			5.45161 0.000148189			5.42926 3.27693e-05
5.44015 -5.13314e-05			5.45219 0.000149184			5.42984 2.20899e-05
5.44073 -4.97337e-05			5.45276 0.000150179			5.43041 3.07023e-05
5.4413 -4.81359e-05			5.45333 0.000151174			5.43098 2.16765e-05
5.44187 -5.19201e-05			5.45391 0.000152168			5.43156 2.98296e-05
5.44244 -5.57043e-05			5.45448 0.000150875			5.43213 3.79827e-05
5.44302 -5.94885e-05			5.45505 0.000149581			5.4327 2.1332e-05
5.44359 -6.32727e-05			5.45563 0.000147797			5.43328 2.23195e-05
5.44416 -5.98809e-05			5.4562 0.000146012			5.43385 3.08458e-05
5.44474 -5.64891e-05			5.45677 0.000150113			5.43442 3.0553e-05
5.44531 -5.42934e-05			5.45735 0.000146367			5.43499 2.89741e-05
5.44588 -5.20976e-05			5.45792 0.00015194			5.43557 2.73951e-05
5.44646 -6.18618e-05			5.45849 0.000149665			5.43614 2.92152e-05
5.44703 -7.16259e-05			5.45907 0.000146083			5.43671 3.10353e-05
5.4476 -6.49078e-05			5.45964 0.000150347			5.43729 2.8997e-05
5.44818 -5.81897e-05			5.46021 0.00014235			5.43786 2.69588e-05
5.44875 -5.86475e-05			5.46078 0.000147433			5.43843 2.35655e-05
5.44932 -5.91054e-05			5.46136 0.000146307			5.43901 2.89913e-05
5.4499 -6.03107e-05			5.46193 0.000145182			5.43958 2.5598e-05
5.45047 -6.1516e-05			5.4625 0.000140951			5.44015 3.10238e-05
5.45104 -5.55454e-05			5.46308 0.000144566			5.44073 2.21186e-05
5.45161 -4.95748e-05			5.46365 0.000142052			5.4413 3.08516e-05
5.45219 -5.32375e-05			5.46422 0.000147384			5.44187 3.07655e-05
5.45276 -5.69003e-05			5.4648 0.000140455			5.44244 3.06793e-05
5.45333 -5.1593e-05			5.46537 0.000141373			5.44302 2.3732e-05
5.45391 -6.06377e-05			5.46594 0.000142169			5.44359 2.56037e-05
5.45448 -5.7573e-05			5.46652 0.000142965			5.44416 2.30659e-05
5.45505 -4.01564e-05			5.46709 0.000133951			5.44474 2.93473e-05
5.45563 -5.74235e-05			5.46766 0.000143248			5.44531 2.12975e-05
5.4562 -6.03387e-05			5.46824 0.000141592			5.44588 3.0886e-05
5.45677 -4.59121e-05			5.46881 0.000139935			5.44646 2.66946e-05
5.45735 -4.58373e-05			5.46938 0.000139423			5.44703 2.25033e-05
5.45792 -5.83205e-05			5.46995 0.000138911			5.4476 2.48344e-05
5.45849 -4.20999e-05			5.47053 0.000141062			5.44818 2.71655e-05
5.45907 -5.7872e-05			5.4711 0.000143213			5.44875 2.83942e-05
5.45964 -4.49403e-05			5.47167 0.000138824			5.44932 2.96229e-05
5.46021 -2.93177e-05			5.47225 0.000134436			5.4499 3.6731e-05
5.46078 -4.23989e-05			5.47282 0.000137322			5.45047 2.62009e-05
5.46136 -4.66502e-05			5.47339 0.000140209			5.45104 2.55922e-05
5.46193 -3.65497e-05			5.47397 0.000139171			5.45161 2.49836e-05
5.4625 -5.2462e-05			5.47454 0.000138134			5.45219 2.42602e-05
5.46308 -3.96705e-05			5.47511 0.000135095			5.45276 2.35367e-05
5.46365 -4.07824e-05			5.47569 0.000132055			5.45333 2.72229e-05
5.46422 -4.18943e-05			5.47626 0.000135554			5.45391 3.0909e-05
5.4648 -4.12122e-05			5.47683 0.000139054			5.45448 3.15635e-05
5.46537 -4.05301e-05			5.47741 0.000138058			5.45505 3.22181e-05
5.46594 -3.50641e-05			5.47798 0.000137061			5.45563 2.84631e-05
5.46652 -2.9598e-05			5.47855 0.000128708			5.4562 2.4708e-05
5.46709 -3.13079e-05			5.47912 0.000133434			5.45677 2.80037e-05
5.46766 -3.30178e-05			5.4797 0.000130302			5.45735 3.12994e-05
5.46824 -3.02427e-05			5.48027 0.000127171			5.45792 2.72458e-05
5.46881 -2.74676e-05			5.48084 0.00012878			5.45849 2.31922e-05
5.46938 -2.46926e-05			5.48142 0.000130389			5.45907 2.54774e-05
5.46995 -2.19175e-05			5.48199 0.000129546			5.45964 2.77626e-05
5.47053 -2.86449e-05			5.48256 0.000128703			5.46021 3.00478e-05
5.4711 -3.53724e-05			5.48314 0.000128678			5.46078 3.23329e-05
5.47167 -3.49239e-05			5.48371 0.000128652			5.46136 2.73406e-05
5.47225 -3.44754e-05			5.48428 0.000123375			5.46193 2.23482e-05
5.47282 -3.49239e-05			5.48486 0.000131176			5.4625 2.76449e-05
5.47339 -3.53724e-05			5.48543 0.000127697			5.46308 3.29415e-05
5.47397 -3.58209e-05			5.486 0.000124218			5.46365 2.99702e-05
5.47454 -3.62694e-05			5.48657 0.000122782			5.46422 2.69989e-05
5.47511 -2.98036e-05			5.48715 0.000121347			5.4648 2.84372e-05
5.47569 -2.33377e-05			5.48772 0.000123835			5.46537 2.98755e-05
5.47626 -3.36158e-05			5.48829 0.000126323			5.46594 3.05789e-05
5.47683 -4.38938e-05			5.48887 0.000124174			5.46652 3.12822e-05
5.47741 -4.0119e-05			5.48944 0.000122026			5.46709 2.2064e-05
5.47798 -3.63441e-05			5.49001 0.000123801			5.46766 3.04841e-05
5.47855 -3.16723e-05			5.49059 0.000125577			5.46824 2.92583e-05
5.47912 -2.70004e-05			5.49116 0.000126371			5.46881 2.80324e-05
5.4797 -3.94462e-05			5.49173 0.000127166			5.46938 2.7909e-05
5.48027 -3.75401e-05			5.49231 0.00012796			5.46995 2.77856e-05
5.48084 -3.02521e-05			5.49288 0.000128754			5.47053 2.9887e-05
5.48142 -3.73159e-05			5.49345 0.000128548			5.4711 3.19884e-05
5.48199 -1.88154e-05			5.49403 0.000128341			5.47167 2.30659e-05
5.48256 -2.90187e-05			5.4946 0.000128134			5.47225 3.47214e-05
5.48314 -1.50031e-05			5.49517 0.000127927			5.47282 2.9198e-05
5.48371 -2.96914e-05			5.49574 0.00012772			5.47339 3.24937e-05
5.48428 -3.06632e-05			5.49632 0.000127513			5.47397 2.38468e-05
5.48486 -3.16349e-05			5.49689 0.000126489			5.47454 2.98985e-05
5.48543 -2.72247e-05			5.49746 0.000125464			5.47511 2.66487e-05
5.486 -2.28145e-05			5.49804 0.00013076			5.47569 2.33989e-05
5.48657 -1.84042e-05			5.49861 0.000122976			5.47626 2.60286e-05
5.48715 -1.3994e-05			5.49918 0.00012255			5.47683 2.86583e-05
5.48772 -1.67598e-05			5.49976 0.000122123			5.47741 2.38468e-05
5.48829 -1.95255e-05			5.50033 0.000124639			5.47798 2.78545e-05
5.48887 -2.00955e-05			5.5009 0.000127155			5.47855 2.63501e-05
5.48944 -2.06654e-05			5.50148 0.000118391			5.47912 2.48458e-05
5.49001 -1.40594e-05			5.50205 0.000122705			5.4797 2.93214e-05
5.49059 -7.45344e-06			5.50262 0.000122647			5.48027 2.49779e-05
5.49116 -1.02659e-05			5.5032 0.000122588			5.48084 3.05559e-05
5.49173 -1.30783e-05			5.50377 0.000125308			5.48142 2.73147e-05
5.49231 -1.40968e-05			5.50434 0.000120182			5.48199 2.74726e-05
5.49288 -1.51153e-05			5.50491 0.000107698			5.48256 2.76305e-05
5.49345 -2.88785e-05			5.50549 0.000118756			5.48314 3.16468e-05
5.49403 -1.3938e-05			5.50606 0.000120496			5.48371 2.68439e-05
5.4946 -2.23193e-05			5.50663 0.000114388			5.48428 3.63492e-05
5.49517 -1.99672e-06			5.50721 0.000114639			5.48486 3.70353e-05
5.49574 -1.9946e-05			5.50778 0.000114889			5.48543 2.9821e-05
5.49632 -9.19137e-06			5.50835 0.000114649			5.486 3.14257e-05
5.49689 -1.27887e-05			5.50893 0.000114409			5.48657 3.22037e-05
5.49746 -1.6386e-05			5.5095 0.000114005			5.48715 3.29817e-05
5.49804 -1.99366e-05			5.51007 0.000113601			5.48772 3.06363e-05
5.49861 -2.34872e-05			5.51065 0.000117121			5.48829 3.711e-05
5.49918 -1.98619e-05			5.51122 0.000120641			5.48887 2.65238e-05
5.49976 -1.62365e-05			5.51179 0.000115354			5.48944 3.65157e-05
5.50033 -2.00861e-05			5.51237 0.000110066			5.49001 2.77669e-05
5.5009 -2.39357e-05			5.51294 0.000111318			5.49059 3.37167e-05
5.50148 -2.86823e-05			5.51351 0.000112569			5.49116 2.97449e-05
5.50205 -3.34289e-05			5.51408 0.000117173			5.49173 3.45923e-05
5.50262 -2.18054e-05			5.51466 0.000121776			5.49231 3.98071e-05
5.5032 -2.45337e-05			5.51523 0.000117224			5.49288 3.62028e-05
5.50377 -9.32218e-06			5.5158 0.000112672			5.49345 4.09124e-05
5.50434 -2.28145e-05			5.51638 0.000118036			5.49403 3.68028e-05
5.50491 -2.10579e-05			5.51695 0.0001234			5.4946 4.11449e-05
5.50549 -4.94933e-06			5.51752 0.000120917			5.49517 3.66679e-05
5.50606 -4.08971e-06			5.5181 0.000131513			5.49574 4.22042e-05
5.50663 -3.23009e-06			5.51867 0.000138431			5.49632 3.3042e-05
5.50721 -1.56759e-05			5.51924 0.000137501			5.49689 3.65573e-05
5.50778 5.82134e-07			5.51982 0.000136081			5.49746 3.12535e-05
5.50835 -1.45546e-05			5.52039 0.00013466			5.49804 3.59286e-05
5.50893 -9.87606e-07			5.52096 0.000121203			5.49861 4.06037e-05
5.5095 -9.84543e-06			5.52153 0.000120825			5.49918 2.78243e-05
5.51007 -4.35134e-06			5.52211 0.00011963			5.49976 3.56229e-05
5.51065 -4.23921e-06			5.52268 0.000118434			5.50033 4.09411e-05
5.51122 -4.12709e-06			5.52325 0.000116258			5.5009 3.15607e-05
5.51179 -1.18637e-05			5.52383 0.000114082			5.50148 3.21018e-05
5.51237 -5.24833e-06			5.5244 0.000111905			5.50205 4.14621e-05
5.51294 -1.47789e-05			5.52497 0.000109729			5.50262 3.34138e-05
5.51351 4.39436e-06			5.52555 0.000110009			5.5032 4.0064e-05
5.51408 -6.0332e-06			5.52612 0.000110288			5.50377 3.45879e-05
5.51466 -2.10885e-06			5.52669 0.000110568			5.50434 4.38104e-05
5.51523 -4.46346e-06			5.52727 0.000110848			5.50491 4.55918e-05
5.5158 -6.81807e-06			5.52784 0.000110719			5.50549 3.8554e-05
5.51638 -3.30484e-06			5.52841 0.00011059			5.50606 3.68444e-05
5.51695 2.08387e-07			5.52899 0.000110461			5.50663 3.51348e-05
5.51752 -3.45434e-06			5.52956 0.000110332			5.50721 4.16114e-05
5.5181 -7.11707e-06			5.53013 0.000114065			5.50778 3.92688e-05
5.51867 -1.21185e-06			5.5307 0.000117798			5.50835 4.48267e-05
5.51924 4.69336e-06			5.53128 0.000114992			5.50893 3.5686e-05
5.51982 -1.66103e-05			5.53185 0.000112186			5.5095 4.74908e-05
5.52039 -9.21006e-06			5.53242 0.000109871			5.51007 4.45971e-05
5.52096 -1.818e-05			5.533 0.000107555			5.51065 4.37243e-05
5.52153 -1.2798e-05			5.53357 0.000109163			5.51122 4.28516e-05
5.52211 -1.3695e-05			5.53414 0.000110771			5.51179 4.74219e-05
5.52268 -1.4592e-05			5.53472 0.000110198			5.51237 3.72937e-05
5.52325 -8.31306e-06			5.53529 0.000109624			5.51294 4.37014e-05
5.52383 -2.0341e-06			5.53586 0.000109051			5.51351 3.54104e-05
5.5244 -1.13711e-06			5.53644 0.000108477			5.51408 4.08994e-05
5.52497 -2.40111e-07			5.53701 0.000106678			5.51466 4.63884e-05
5.52555 -1.2798e-05			5.53758 0.000104878			5.51523 4.41607e-05
5.52612 3.34787e-06			5.53816 0.000107002			5.5158 4.19329e-05
5.52669 -1.2798e-05			5.53873 0.000109126			5.51638 3.73856e-05
5.52727 -2.40111e-07			5.5393 0.00010982			5.51695 4.16573e-05
5.52784 1.55388e-06			5.53987 0.000110513			5.51752 4.09683e-05
5.52841 3.34787e-06			5.54045 0.000107283			5.5181 4.02793e-05
5.52899 -1.5489e-05			5.54102 0.000104053			5.51867 3.85798e-05
5.52956 -5.62208e-06			5.54159 0.000108016			5.51924 3.68803e-05
5.53013 -1.23495e-05			5.54217 0.000111979			5.51982 3.86717e-05
5.5307 -4.72508e-06			5.54274 0.000106787			5.52039 4.04631e-05
5.53128 -5.17358e-06			5.54331 0.000101596			5.52096 4.6021e-05
5.53185 -5.62208e-06			5.54389 0.00010438			5.52153 3.68803e-05
5.53242 6.48735e-06			5.54446 0.000107164			5.52211 3.98659e-05
5.533 -1.0107e-05			5.54503 0.0001039			5.52268 4.28516e-05
5.53357 -6.36957e-06			5.54561 0.000100635			5.52325 4.51023e-05
5.53414 -2.6321e-06			5.54618 9.82696e-05			5.52383 3.85339e-05
5.53472 2.33807e-05			5.54675 0.000103751			5.5244 4.62966e-05
5.53529 1.55388e-06			5.54733 0.000100896			5.52497 4.52401e-05
5.53586 -8.61206e-06			5.5479 9.80397e-05			5.52555 4.25573e-05
5.53644 9.92583e-06			5.54847 9.74931e-05			5.52612 3.98746e-05
5.53701 4.84286e-06			5.54904 9.69464e-05			5.52669 4.39899e-05
5.53758 1.41118e-05			5.54962 0.000100323			5.52727 4.81052e-05
5.53816 1.62048e-05			5.55019 9.58531e-05			5.52784 4.83621e-05
5.53873 3.94586e-06			5.55076 0.000102173			5.52841 4.86191e-05
5.5393 2.05403e-05			5.55134 0.000100645			5.52899 4.8876e-05
5.53987 8.43084e-06			5.55191 9.91177e-05			5.52956 4.91329e-05
5.54045 1.15703e-05			5.55248 9.75901e-05			5.53013 4.92061e-05
5.54102 1.47098e-05			5.55306 9.75697e-05			5.5307 4.92794e-05
5.54159 1.18693e-05			5.55363 9.75493e-05			5.53128 4.93526e-05
5.54217 9.02883e-06			5.5542 0.000101943			5.53185 4.94258e-05
5.54274 7.68334e-06			5.55478 9.84893e-05			5.53242 4.83966e-05
5.54331 6.33785e-06			5.55535 9.87141e-05			5.533 4.73674e-05
5.54389 -7.14744e-06			5.55592 9.89389e-05			5.53357 4.54195e-05
5.54446 3.28713e-06			5.55649 9.42592e-05			5.53414 4.34717e-05
5.54503 -2.1252e-06			5.55707 9.74267e-05			5.53472 5.25822e-05
5.54561 6.81438e-06			5.55764 9.5097e-05			5.53529 4.69942e-05
5.54618 2.08369e-05			5.55821 9.27674e-05			5.53586 4.52645e-05
5.54675 1.09396e-05			5.55879 9.14186e-05			5.53644 5.2354e-05
5.54733 6.72328e-06			5.55936 9.00699e-05			5.53701 4.63985e-05
5.5479 2.50694e-06			5.55993 8.7168e-05			5.53758 4.92621e-05
5.54847 1.51466e-05			5.56051 9.21134e-05			5.53816 5.10234e-05
5.54904 3.86644e-06			5.56108 9.31352e-05			5.53873 3.8086e-05
5.54962 6.04119e-06			5.56165 9.4157e-05			5.5393 4.09497e-05
5.55019 8.21593e-06			5.56223 8.61475e-05			5.53987 3.49942e-05
5.55076 7.1017e-06			5.5628 8.59853e-05			5.54045 4.24511e-05
5.55134 5.98746e-06			5.56337 9.57957e-05			5.54102 4.10889e-05
5.55191 1.20492e-05			5.56395 9.77587e-05			5.54159 4.28502e-05
5.55248 3.75899e-06			5.56452 8.90953e-05			5.54217 4.46114e-05
5.55306 1.5782e-05			5.56509 9.35107e-05			5.54274 4.63727e-05
5.55363 1.34531e-05			5.56566 8.58282e-05			5.54331 3.93147e-05
5.5542 5.14419e-06			5.56624 9.12245e-05			5.54389 4.57942e-05
5.55478 1.11872e-05			5.56681 9.57829e-05			5.54446 5.22736e-05
5.55535 -4.29761e-06			5.56738 8.72625e-05			5.54503 4.0931e-05
5.55592 1.37054e-05			5.56796 9.084e-05			5.54561 4.72267e-05
5.55649 1.37684e-05			5.56853 8.65703e-05			5.54618 4.77349e-05
5.55707 1.38315e-05			5.5691 9.38262e-05			5.54675 4.8243e-05
5.55764 1.25864e-05			5.56968 9.32348e-05			5.54733 4.98535e-05
5.55821 1.13414e-05			5.57025 8.52867e-05			5.5479 5.1464e-05
5.55879 2.53453e-05			5.57082 9.04173e-05			5.54847 4.99511e-05
5.55936 2.49972e-05			5.5714 8.71642e-05			5.54904 4.84382e-05
5.55993 2.49481e-05			5.57197 8.39111e-05			5.54962 5.13349e-05
5.56051 2.48991e-05			5.57254 9.22654e-05			5.55019 5.42315e-05
5.56108 1.49831e-05			5.57312 8.7541e-05			5.55076 5.21674e-05
5.56165 1.9419e-05			5.57369 8.82932e-05			5.55134 5.01033e-05
5.56223 3.11267e-05			5.57426 8.11983e-05			5.55191 5.24487e-05
5.5628 2.84824e-05			5.57483 8.08062e-05			5.55248 5.47942e-05
5.56337 1.95592e-05			5.57541 8.0414e-05			5.55306 5.45789e-05
5.56395 2.49879e-05			5.57598 8.6827e-05			5.55363 5.43636e-05
5.56452 2.29416e-05			5.57655 8.01612e-05			5.5542 5.41483e-05
5.56509 2.08953e-05			5.57713 8.52662e-05			5.55478 5.39329e-05
5.56566 1.9746e-05			5.5777 8.2524e-05			5.55535 5.64736e-05
5.56624 1.85968e-05			5.57827 8.37872e-05			5.55592 5.90143e-05
5.56681 2.5371e-05			5.57885 8.50504e-05			5.55649 5.71454e-05
5.56738 3.21451e-05			5.57942 7.55236e-05			5.55707 5.52765e-05
5.56796 1.97834e-05			5.57999 8.4307e-05			5.55764 5.63932e-05
5.56853 2.17736e-05			5.58057 8.18292e-05			5.55821 5.751e-05
5.5691 2.13719e-05			5.58114 7.93514e-05			5.55879 5.75243e-05
5.56968 3.5322e-05			5.58171 8.61922e-05			5.55936 5.75387e-05
5.57025 3.49202e-05			5.58229 7.99542e-05			5.55993 6.53617e-05
5.57082 3.45184e-05			5.58286 7.55964e-05			5.56051 5.55463e-05
5.5714 3.44063e-05			5.58343 8.43172e-05			5.56108 5.56526e-05
5.57197 3.42942e-05			5.584 8.48639e-05			5.56165 5.57588e-05
5.57254 2.16241e-05			5.58458 8.54105e-05			5.56223 5.63617e-05
5.57312 3.28739e-05			5.58515 8.42202e-05			5.5628 5.69645e-05
5.57369 2.51374e-05			5.58572 8.30298e-05			5.56337 5.75674e-05
5.57426 3.17527e-05			5.5863 8.1349e-05			5.56395 5.81703e-05
5.57483 3.17901e-05			5.58687 8.75154e-05			5.56452 5.79463e-05
5.57541 3.18274e-05			5.58744 8.57528e-05			5.56509 5.77224e-05
5.57598 3.26123e-05			5.58802 8.39903e-05			5.56566 5.74985e-05
5.57655 3.33972e-05			5.58859 8.22277e-05			5.56624 5.72746e-05
5.57713 3.41821e-05			5.58916 8.83124e-05			5.56681 5.6821e-05
5.5777 3.49669e-05			5.58974 8.45318e-05			5.56738 5.63674e-05
5.57827 3.48548e-05			5.59031 8.07512e-05			5.56796 6.03234e-05
5.57885 3.47427e-05			5.59088 7.74611e-05			5.56853 6.42794e-05
5.57942 4.18065e-05			5.59145 8.72497e-05			5.5691 6.46526e-05
5.57999 3.45184e-05			5.59203 7.7502e-05			5.56968 6.50258e-05
5.58057 4.2575e-05			5.5926 8.0833e-05			5.57025 6.5399e-05
5.58114 3.62797e-05			5.59317 8.4164e-05			5.57082 6.57722e-05
5.58171 4.61303e-05			5.59375 8.7495e-05			5.5714 6.65129e-05
5.58229 4.1629e-05			5.59432 8.50836e-05			5.57197 6.72535e-05
5.58286 3.93701e-05			5.59489 8.26722e-05			5.57254 6.79942e-05
5.58343 5.14632e-05			5.59547 8.38574e-05			5.57312 6.87349e-05
5.584 3.12645e-05			5.59604 7.71954e-05			5.57369 6.56172e-05
5.58458 5.41215e-05			5.59661 8.51653e-05			5.57426 6.24995e-05
5.58515 4.00522e-05			5.59719 8.00564e-05			5.57483 6.37913e-05
5.58572 4.03349e-05			5.59776 7.44571e-05			5.57541 6.50832e-05
5.5863 4.24115e-05			5.59833 8.19365e-05			5.57598 6.80516e-05
5.58687 4.44881e-05			5.59891 8.09045e-05			5.57655 7.102e-05
5.58744 4.59668e-05			5.59948 7.98725e-05			5.57713 6.95789e-05
5.58802 4.74454e-05			5.60005 8.35816e-05			5.5777 6.81377e-05
5.58859 4.98211e-05			5.60062 7.94434e-05			5.57827 6.89932e-05
5.58916 5.21967e-05			5.6012 8.44603e-05			5.57885 6.98487e-05
5.58974 4.948e-05			5.60177 8.163e-05			5.57942 7.07042e-05
5.59031 6.11152e-05			5.60234 7.87996e-05			5.57999 7.15598e-05
5.59088 3.47777e-05			5.60292 7.59693e-05			5.58057 7.61215e-05
5.59145 5.14959e-05			5.60349 7.80844e-05			5.58114 8.06832e-05
5.59203 4.25003e-05			5.60406 8.01995e-05			5.58171 7.78956e-05
5.5926 5.74245e-05			5.60464 8.19876e-05			5.58229 7.51081e-05
5.59317 5.44088e-05			5.60521 7.59284e-05			5.58286 7.56277e-05
5.59375 5.13931e-05			5.60578 8.38472e-05			5.58343 7.61473e-05
5.59432 4.8826e-05			5.60636 7.86872e-05			5.584 7.66669e-05
5.59489 4.62588e-05			5.60693 8.1211e-05			5.58458 7.71866e-05
5.59547 5.62495e-05			5.6075 8.37348e-05			5.58515 7.47435e-05
5.59604 4.23204e-05			5.60808 7.41403e-05			5.58572 7.23004e-05
5.59661 5.32082e-05			5.60865 7.76246e-05			5.5863 7.42669e-05
5.59719 4.9744e-05			5.60922 8.20898e-05			5.58687 7.62334e-05
5.59776 6.09307e-05			5.60979 7.87077e-05			5.58744 7.78325e-05
5.59833 5.77655e-05			5.61037 7.83501e-05			5.58802 7.94315e-05
5.59891 5.14212e-05			5.61094 7.79924e-05			5.58859 8.10306e-05
5.59948 4.50768e-05			5.61151 7.76348e-05			5.58916 8.26296e-05
5.60005 5.75693e-05			5.61209 7.72772e-05			5.58974 7.94631e-05
5.60062 4.6142e-05			5.61266 7.49373e-05			5.59031 7.62966e-05
5.6012 5.6392e-05			5.61323 8.04447e-05			5.59088 7.75397e-05
5.60177 5.22901e-05			5.61381 7.12385e-05			5.59145 7.87827e-05
5.60234 5.56632e-05			5.61438 8.03425e-05			5.59203 7.96583e-05
5.60292 5.90363e-05			5.61495 7.84114e-05			5.5926 8.05339e-05
5.60349 5.07484e-05			5.61553 7.64802e-05			5.59317 8.14095e-05
5.60406 5.68125e-05			5.6161 7.66743e-05			5.59375 8.22851e-05
5.60464 5.48036e-05			5.61667 7.68685e-05			5.59432 8.19205e-05
5.60521 5.27947e-05			5.61725 6.99153e-05			5.59489 8.15559e-05
5.60578 5.16828e-05			5.61782 7.86566e-05			5.59547 7.56794e-05
5.60636 5.05709e-05			5.61839 8.39647e-05			5.59604 8.74411e-05
5.60693 4.9459e-05			5.61896 7.35783e-05			5.59661 8.4688e-05
5.6075 6.2699e-05			5.61954 6.68704e-05			5.59719 8.19349e-05
5.60808 5.99613e-05			5.62011 6.80096e-05			5.59776 8.02842e-05
5.60865 7.15755e-05			5.62068 7.02933e-05			5.59833 7.86334e-05
5.60922 6.88378e-05			5.62126 7.2577e-05			5.59891 7.97186e-05
5.60979 5.17482e-05			5.62183 7.35119e-05			5.59948 8.08038e-05
5.61037 4.5871e-05			5.6224 7.44469e-05			5.60005 7.74794e-05
5.61094 6.39137e-05			5.62298 7.14581e-05			5.60062 7.4155e-05
5.61151 6.04285e-05			5.62355 6.84694e-05			5.6012 7.93741e-05
5.61209 5.69433e-05			5.62412 6.90774e-05			5.60177 8.45933e-05
5.61266 5.74572e-05			5.6247 6.96854e-05			5.60234 8.54028e-05
5.61323 5.79711e-05			5.62527 7.02933e-05			5.60292 8.62124e-05
5.61381 5.1309e-05			5.62584 7.09013e-05			5.60349 8.43349e-05
5.61438 5.89989e-05			5.62641 7.10188e-05			5.60406 8.24574e-05
5.61495 5.14399e-05			5.62699 7.11363e-05			5.60464 9.4911e-05
5.61553 5.82327e-05			5.62756 7.12538e-05			5.60521 8.97263e-05
5.6161 4.79827e-05			5.62813 7.13713e-05			5.60578 8.75732e-05
5.61667 5.20846e-05			5.62871 7.14888e-05			5.60636 8.54201e-05
5.61725 6.3026e-05			5.62928 7.16063e-05			5.60693 8.95138e-05
5.61782 4.52637e-05			5.62985 7.17238e-05			5.6075 9.36076e-05
5.61839 5.17202e-05			5.63043 7.18413e-05			5.60808 9.36335e-05
5.61896 5.81767e-05			5.631 7.07531e-05			5.60865 9.36593e-05
5.61954 5.90269e-05			5.63157 6.96649e-05			5.60922 9.36851e-05
5.62011 5.98772e-05			5.63215 6.85767e-05			5.60979 9.3711e-05
5.62068 6.43155e-05			5.63272 6.74885e-05			5.61037 9.28181e-05
5.62126 6.87537e-05			5.63329 6.76265e-05			5.61094 9.19253e-05
5.62183 6.39978e-05			5.63387 6.77644e-05			5.61151 9.10325e-05
5.6224 5.92418e-05			5.63444 6.79024e-05			5.61209 9.01397e-05
5.62298 6.16619e-05			5.63501 6.80403e-05			5.61266 9.20717e-05
5.62355 6.40819e-05			5.63558 6.9905e-05			5.61323 9.40038e-05
5.62412 6.51564e-05			5.63616 7.17698e-05			5.61381 9.15263e-05
5.6247 6.62309e-05			5.63673 6.70952e-05			5.61438 8.90488e-05
5.62527 6.37175e-05			5.6373 6.24205e-05			5.61495 8.79492e-05
5.62584 6.1204e-05			5.63788 6.61653e-05			5.61553 8.68497e-05
5.62641 6.18487e-05			5.63845 6.99102e-05			5.6161 8.57502e-05
5.62699 6.24934e-05			5.63902 6.69521e-05			5.61667 8.46507e-05
5.62756 6.85201e-05			5.6396 7.18413e-05			5.61725 8.62296e-05
5.62813 7.45468e-05			5.64017 6.15673e-05			5.61782 8.78086e-05
5.62871 7.93775e-05			5.64074 7.74509e-05			5.61839 8.49779e-05
5.62928 5.55044e-05			5.64132 5.99836e-05			5.61896 9.09665e-05
5.62985 5.97371e-05			5.64189 6.86738e-05			5.61954 8.95138e-05
5.63043 6.39697e-05			5.64246 7.06612e-05			5.62011 9.68804e-05
5.631 6.21104e-05			5.64304 6.48013e-05			5.62068 8.55062e-05
5.63157 6.0251e-05			5.64361 6.49903e-05			5.62126 9.17703e-05
5.63215 6.19795e-05			5.64418 6.51793e-05			5.62183 9.09378e-05
5.63272 6.37081e-05			5.64475 6.55727e-05			5.6224 9.01052e-05
5.63329 6.08022e-05			5.64533 6.59661e-05			5.62298 9.09263e-05
5.63387 5.78963e-05			5.6459 6.63595e-05			5.62355 9.17473e-05
5.63444 7.11364e-05			5.64647 6.67529e-05			5.62412 8.81588e-05
5.63501 5.56725e-05			5.64705 6.6901e-05			5.6247 9.33894e-05
5.63558 5.89242e-05			5.64762 6.70492e-05			5.62527 9.97225e-05
5.63616 6.21758e-05			5.64819 6.71973e-05			5.62584 9.72363e-05
5.63673 6.90153e-05			5.64877 6.73455e-05			5.62641 8.6198e-05
5.6373 7.58549e-05			5.64934 7.03955e-05			5.62699 9.27981e-05
5.63788 5.65322e-05			5.64991 7.34455e-05			5.62756 9.82957e-05
5.63845 6.59132e-05			5.65049 7.25719e-05			5.62813 9.49741e-05
5.63902 6.63244e-05			5.65106 7.16983e-05			5.62871 9.90937e-05
5.6396 6.67355e-05			5.65163 7.01707e-05			5.62928 0.000103213
5.64017 6.48294e-05			5.65221 6.86431e-05			5.62985 9.83301e-05
5.64074 6.29233e-05			5.65278 7.49629e-05			5.63043 9.34469e-05
5.64132 6.46051e-05			5.65335 6.5588e-05			5.631 0.000105306
5.64189 6.6287e-05			5.65392 7.25195e-05			5.63157 9.95272e-05
5.64246 6.63991e-05			5.6545 6.37565e-05			5.63215 9.87091e-05
5.64304 6.65112e-05			5.65507 6.4966e-05			5.63272 9.78909e-05
5.64361 5.40654e-05			5.65564 7.40228e-05			5.63329 0.000104422
5.64418 7.03235e-05			5.65622 7.21261e-05			5.63387 0.000102134
5.64475 6.8081e-05			5.65679 7.02295e-05			5.63444 9.1578e-05
5.64533 6.58385e-05			5.65736 6.88232e-05			5.63501 9.86603e-05
5.6459 6.8978e-05			5.65794 6.7417e-05			5.63558 8.95081e-05
5.64647 7.21175e-05			5.65851 6.75843e-05			5.63616 9.79942e-05
5.64705 6.89032e-05			5.65908 6.77516e-05			5.63673 8.82909e-05
5.64762 6.5689e-05			5.65966 6.39953e-05			5.6373 8.74067e-05
5.64819 8.22086e-05			5.66023 6.0239e-05			5.63788 9.32287e-05
5.64877 7.00245e-05			5.6608 6.4003e-05			5.63845 9.90507e-05
5.64934 7.38367e-05			5.66138 6.7767e-05			5.63902 9.10928e-05
5.64991 7.76489e-05			5.66195 6.49916e-05			5.6396 0.000100773
5.65049 8.56471e-05			5.66252 6.22162e-05			5.64017 9.99349e-05
5.65106 6.49415e-05			5.66309 6.22813e-05			5.64074 9.90966e-05
5.65163 5.79898e-05			5.66367 6.23464e-05			5.64132 9.38488e-05
5.65221 7.97419e-05			5.66424 6.78066e-05			5.64189 9.74201e-05
5.65278 7.63782e-05			5.66481 6.54194e-05			5.64246 0.000101451
5.65335 7.30144e-05			5.66539 5.69834e-05			5.64304 9.66622e-05
5.65392 7.54905e-05			5.66596 6.42418e-05			5.64361 0.000113922
5.6545 7.79666e-05			5.66653 6.65958e-05			5.64418 0.000101784
5.65507 7.68547e-05			5.66711 6.11024e-05			5.64475 0.000102921
5.65564 7.57428e-05			5.66768 6.55816e-05			5.64533 0.000104057
5.65622 7.62006e-05			5.66825 7.00609e-05			5.6459 9.72937e-05
5.65679 7.66585e-05			5.66883 6.71833e-05			5.64647 9.93493e-05
5.65736 6.09704e-05			5.6694 5.64584e-05			5.64705 0.000112429
5.65794 7.39862e-05			5.66997 5.77497e-05			5.64762 0.00010787
5.65851 7.42198e-05			5.67054 6.68882e-05			5.64819 0.000107904
5.65908 7.44534e-05			5.67112 6.3275e-05			5.64877 9.91196e-05
5.65966 7.82749e-05			5.67169 6.7509e-05			5.64934 0.000108616
5.66023 8.20965e-05			5.67226 6.56289e-05			5.64991 0.000109294
5.6608 6.21477e-05			5.67284 7.15961e-05			5.65049 0.00010005
5.66138 7.09028e-05			5.67341 6.18688e-05			5.65106 0.000108444
5.66195 7.96578e-05			5.67398 6.78359e-05			5.65163 0.000103518
5.66252 5.9709e-05			5.67456 6.12966e-05			5.65221 9.85914e-05
5.66309 6.49695e-05			5.67513 7.04517e-05			5.65278 0.000109099
5.66367 7.023e-05			5.6757 6.39123e-05			5.65335 0.000101967
5.66424 6.47266e-05			5.67628 6.52202e-05			5.65392 0.000101227
5.66481 5.92232e-05			5.67685 6.02748e-05			5.6545 0.000100486
5.66539 7.24071e-05			5.67742 6.31766e-05			5.65507 9.8643e-05
5.66596 5.68872e-05			5.678 7.00021e-05			5.65564 9.68e-05
5.66653 6.46892e-05			5.67857 6.11331e-05			5.65622 9.67942e-05
5.66711 7.24912e-05			5.67914 6.96751e-05			5.65679 9.67885e-05
5.66768 6.66514e-05			5.67971 6.25227e-05			5.65736 9.67827e-05
5.66825 6.08116e-05			5.68029 6.76316e-05			5.65794 9.6777e-05
5.66883 5.07858e-05			5.68086 6.48932e-05			5.65851 9.95502e-05
5.6694 6.94638e-05			5.68143 6.49852e-05			5.65908 0.000102323
5.66997 6.83333e-05			5.68201 6.50771e-05			5.65966 9.95847e-05
5.67054 6.72027e-05			5.68258 6.46786e-05			5.66023 9.68459e-05
5.67112 7.1454e-05			5.68315 6.42802e-05			5.6608 0.000105958
5.67169 7.57054e-05			5.68373 6.29007e-05			5.66138 9.74315e-05
5.67226 7.24305e-05			5.6843 6.15214e-05			5.66195 0.000102685
5.67284 6.91555e-05			5.68487 6.66813e-05			5.66252 9.91196e-05
5.67341 7.30565e-05			5.68545 7.18413e-05			5.66309 0.000110488
5.67398 7.69575e-05			5.68602 7.18924e-05			5.66367 0.000104218
5.67456 7.04683e-05			5.68659 7.19435e-05			5.66424 0.000107319
5.67513 6.39791e-05			5.68717 6.80709e-05			5.66481 0.000110419
5.6757 8.08118e-05			5.68774 6.41984e-05			5.66539 0.000111682
5.67628 6.89406e-05			5.68831 6.662e-05			5.66596 0.000112945
5.67685 7.96438e-05			5.68888 6.90416e-05			5.66653 0.000109799
5.67742 9.0347e-05			5.68946 6.49239e-05			5.66711 0.000106653
5.678 7.11504e-05			5.69003 6.08061e-05			5.66768 0.000112096
5.67857 8.06576e-05			5.6906 6.25444e-05			5.66825 0.000117539
5.67914 7.55886e-05			5.69118 6.42827e-05			5.66883 0.000117102
[truncated: 4,873 more rows]

## Sheet: Figure 3b
X	Y	Z	X	Y	Z	X	Y	Z	X	Y	Z	X	Y	Z	X	Y	Z
1	4.513	1	1	5.891	1.1	1	6.15	2	1	6.237	2.2	1	4.16	3	1	4.16	3.2
2	4.894	1	2	5.702	1.1	2	6.48	2	2	6.498	2.2	2	3.95	3	2	3.95	3.2
3	3.991	1	3	5.998	1.1	3	6.07	2	3	6.176	2.2	3	4.139	3	3	4.139	3.2

## Sheet: Figure 4a
TCA-NH4		TCA-CHCl3		TCA-CHBr3		TCA-CHI3
X	Y	X	Y	X	Y	X	Y
400	0.09569	400	0.0992	400	0.20899	400	0.24212
401	0.10105	401	0.11663	401	0.23312	401	0.20612
402	0.11089	402	0.14101	402	0.26354	402	0.20333
403	0.12299	403	0.15873	403	0.30916	403	0.22188
404	0.13493	404	0.19054	404	0.34926	404	0.23347
405	0.14278	405	0.22112	405	0.37235	405	0.24014
406	0.15899	406	0.25374	406	0.42311	406	0.26267
407	0.17882	407	0.28674	407	0.46708	407	0.28556
408	0.19129	408	0.32809	408	0.50204	408	0.28849
409	0.22173	409	0.36853	409	0.5394	409	0.30429
410	0.24388	410	0.40962	410	0.57486	410	0.27895
411	0.28233	411	0.45007	411	0.61217	411	0.30956
412	0.32767	412	0.4982	412	0.66081	412	0.32064
413	0.36907	413	0.53646	413	0.69472	413	0.33684
414	0.43523	414	0.5854	414	0.71988	414	0.34707
415	0.47583	415	0.63414	415	0.74539	415	0.36071
416	0.53434	416	0.67092	416	0.77295	416	0.38186
417	0.59319	417	0.6974	417	0.78618	417	0.38167
418	0.63943	418	0.73057	418	0.8249	418	0.38457
419	0.6876	419	0.76664	419	0.8483	419	0.39068
420	0.7463	420	0.7893	420	0.87874	420	0.42548
421	0.78107	421	0.82939	421	0.87853	421	0.43148
422	0.82552	422	0.83983	422	0.89936	422	0.45267
423	0.85937	423	0.85799	423	0.92367	423	0.46676
424	0.88831	424	0.88343	424	0.92463	424	0.47032
425	0.90047	425	0.90845	425	0.92758	425	0.48172
426	0.92242	426	0.91312	426	0.93803	426	0.49182
427	0.94123	427	0.92864	427	0.94692	427	0.48735
428	0.95051	428	0.9342	428	0.95147	428	0.49863
429	0.96579	429	0.96191	429	0.97617	429	0.52065
430	0.97519	430	0.95916	430	0.98068	430	0.51748
431	0.98357	431	0.9713	431	0.97014	431	0.51682
432	0.98688	432	0.97018	432	0.9907	432	0.5588
433	0.98371	433	0.99414	433	0.9918	433	0.56964
434	1	434	0.99734	434	1	434	0.56708
435	0.99667	435	0.98925	435	0.99587	435	0.56632
436	0.9838	436	0.99422	436	0.98425	436	0.5804
437	0.97031	437	0.98189	437	0.9762	437	0.57965
438	0.99399	438	0.99465	438	0.98213	438	0.62054
439	0.97611	439	1	439	0.98595	439	0.63525
440	0.97401	440	0.98017	440	0.96589	440	0.6258
441	0.9636	441	0.98252	441	0.97051	441	0.63161
442	0.95872	442	0.98093	442	0.97418	442	0.63007
443	0.93762	443	0.98235	443	0.97396	443	0.6598
444	0.94418	444	0.9579	444	0.96683	444	0.66655
445	0.93387	445	0.96243	445	0.96316	445	0.70534
446	0.92359	446	0.94996	446	0.93562	446	0.74202
447	0.92725	447	0.95054	447	0.94178	447	0.72253
448	0.92468	448	0.95299	448	0.94285	448	0.7089
449	0.9136	449	0.93089	449	0.93448	449	0.74544
450	0.89628	450	0.94432	450	0.92798	450	0.74624
451	0.88415	451	0.91901	451	0.92059	451	0.76452
452	0.87541	452	0.92716	452	0.91059	452	0.76539
453	0.86666	453	0.92002	453	0.92587	453	0.80076
454	0.85978	454	0.90448	454	0.89345	454	0.77816
455	0.83076	455	0.89398	455	0.89652	455	0.80634
456	0.82437	456	0.87883	456	0.8771	456	0.82603
457	0.80423	457	0.88747	457	0.88285	457	0.83604
458	0.7922	458	0.87908	458	0.87107	458	0.8448
459	0.75651	459	0.86367	459	0.8551	459	0.83695
460	0.76753	460	0.85805	460	0.83519	460	0.84899
461	0.75161	461	0.83799	461	0.82673	461	0.88196
462	0.72141	462	0.83159	462	0.80765	462	0.85643
463	0.70808	463	0.81083	463	0.79564	463	0.89691
464	0.68875	464	0.80842	464	0.78907	464	0.88444
465	0.67512	465	0.7883	465	0.77614	465	0.90478
466	0.65235	466	0.77257	466	0.76683	466	0.90002
467	0.63774	467	0.76989	467	0.75201	467	0.92234
468	0.62468	468	0.74685	468	0.74069	468	0.92698
469	0.60532	469	0.74353	469	0.74471	469	0.94435
470	0.60093	470	0.72092	470	0.72532	470	0.91258
471	0.59193	471	0.72399	471	0.70363	471	0.94934
472	0.57195	472	0.70214	472	0.69681	472	0.9565
473	0.54885	473	0.6977	473	0.69143	473	0.94702
474	0.54038	474	0.6723	474	0.67862	474	0.96264
475	0.53518	475	0.6724	475	0.66668	475	0.97106
476	0.51306	476	0.66596	476	0.64387	476	0.96042
477	0.50084	477	0.64262	477	0.64309	477	0.97606
478	0.48732	478	0.6395	478	0.64407	478	0.96959
479	0.47529	479	0.62386	479	0.6224	479	0.97108
480	0.47042	480	0.60914	480	0.60425	480	0.98986
481	0.45634	481	0.59748	481	0.59446	481	1
482	0.4494	482	0.58012	482	0.58685	482	0.99519
483	0.44173	483	0.59215	483	0.56314	483	0.98364
484	0.41448	484	0.56737	484	0.56541	484	0.98812
485	0.41585	485	0.56722	485	0.56374	485	0.98002
486	0.40216	486	0.54839	486	0.54588	486	0.97965
487	0.39592	487	0.53467	487	0.53714	487	0.99306
488	0.37413	488	0.52197	488	0.52538	488	0.98141
489	0.37516	489	0.5075	489	0.51299	489	0.97077
490	0.35453	490	0.5057	490	0.50409	490	0.96897
491	0.3508	491	0.49857	491	0.4926	491	0.99035
492	0.34414	492	0.48404	492	0.49549	492	0.98161
493	0.33204	493	0.48147	493	0.46866	493	0.96265
494	0.32639	494	0.46806	494	0.47841	494	0.96737
495	0.32279	495	0.4568	495	0.46156	495	0.95787
496	0.30849	496	0.46042	496	0.45462	496	0.94246
497	0.31013	497	0.44513	497	0.44814	497	0.93978
498	0.29541	498	0.44742	498	0.43017	498	0.93795
499	0.28739	499	0.4239	499	0.42952	499	0.94184
500	0.28381	500	0.4148	500	0.42259	500	0.9032
501	0.2679	501	0.41065	501	0.4041	501	0.89613
502	0.26865	502	0.4022	502	0.40635	502	0.89248
503	0.26328	503	0.39031	503	0.38468	503	0.87541
504	0.23342	504	0.38302	504	0.3809	504	0.91314
505	0.22424	505	0.37641	505	0.38894	505	0.88469
506	0.22265	506	0.37825	506	0.36445	506	0.87805
507	0.22013	507	0.36352	507	0.37139	507	0.85674
508	0.2076	508	0.34531	508	0.36659	508	0.86131
509	0.19551	509	0.34396	509	0.35378	509	0.84468
510	0.19521	510	0.33615	510	0.34296	510	0.81787
511	0.19259	511	0.33033	511	0.32992	511	0.84322
512	0.18415	512	0.32085	512	0.33123	512	0.83031
513	0.17906	513	0.31683	513	0.31984	513	0.79014
514	0.17996	514	0.31438	514	0.31891	514	0.7799
515	0.16677	515	0.31272	515	0.31204	515	0.78069
516	0.16539	516	0.29981	516	0.30495	516	0.77351
517	0.16155	517	0.29391	517	0.29734	517	0.73985
518	0.15546	518	0.288	518	0.28545	518	0.75968
519	0.15514	519	0.2866	519	0.27624	519	0.76147
520	0.15236	520	0.28061	520	0.28326	520	0.70806
521	0.1435	521	0.26401	521	0.27792	521	0.71131
522	0.13873	522	0.25878	522	0.2799	522	0.69041
523	0.13437	523	0.25731	523	0.26793	523	0.69627
524	0.13362	524	0.24856	524	0.26293	524	0.64814
525	0.13194	525	0.248	525	0.26563	525	0.66907
526	0.12848	526	0.24102	526	0.25367	526	0.67265
527	0.1214	527	0.23461	527	0.24833	527	0.65072
528	0.11453	528	0.23249	528	0.23797	528	0.65272
529	0.11349	529	0.22654	529	0.22821	529	0.61749
530	0.11558	530	0.22277	530	0.23218	530	0.61129
531	0.10626	531	0.21558	531	0.23188	531	0.61335
532	0.10427	532	0.21208	532	0.22159	532	0.58205
533	0.10232	533	0.21366	533	0.2179	533	0.58734
534	0.09804	534	0.20786	534	0.2227	534	0.58981
535	0.09401	535	0.20504	535	0.20827	535	0.57461
536	0.09239	536	0.19378	536	0.20252	536	0.54741
537	0.08684	537	0.18807	537	0.21	537	0.53809
538	0.08707	538	0.18541	538	0.20776	538	0.54186
539	0.08111	539	0.17795	539	0.19613	539	0.5326
540	0.07921	540	0.18401	540	0.189	540	0.51802
541	0.07856	541	0.18258	541	0.18546	541	0.50311
542	0.077	542	0.17168	542	0.18465	542	0.48961
543	0.0743	543	0.16958	543	0.17869	543	0.47385
544	0.0723	544	0.16694	544	0.17446	544	0.50194
545	0.07072	545	0.1679	545	0.17481	545	0.47995
546	0.06638	546	0.15893	546	0.17262	546	0.4677
547	0.06388	547	0.15482	547	0.1667	547	0.4564
548	0.06688	548	0.158	548	0.16312	548	0.42361
549	0.06163	549	0.14848	549	0.16035	549	0.43745
550	0.05911	550	0.14588	550	0.15309	550	0.429
551	0.05911	551	0.13558	551	0.15307	551	0.41252
552	0.05631	552	0.13956	552	0.14314	552	0.41606
553	0.05411	553	0.13741	553	0.14073	553	0.39958
554	0.05245	554	0.13742	554	0.14697	554	0.40288
555	0.05087	555	0.13054	555	0.13451	555	0.39139
556	0.05289	556	0.12391	556	0.13694	556	0.37431
557	0.05134	557	0.12007	557	0.13231	557	0.38439
558	0.04511	558	0.12096	558	0.1317	558	0.3703
559	0.04432	559	0.11995	559	0.1393	559	0.36907
560	0.0415	560	0.11856	560	0.12413	560	0.36264
561	0.04469	561	0.1145	561	0.12757	561	0.358
562	0.04175	562	0.1149	562	0.1167	562	0.33728
563	0.03998	563	0.11551	563	0.1208	563	0.33487
564	0.03991	564	0.10974	564	0.11573	564	0.33101
565	0.04042	565	0.10811	565	0.11256	565	0.32638
566	0.03655	566	0.10513	566	0.11011	566	0.31993
567	0.03553	567	0.10319	567	0.11448	567	0.31108
568	0.03709	568	0.10195	568	0.11257	568	0.3075
569	0.02975	569	0.09631	569	0.10645	569	0.30204
570	0.03426	570	0.08862	570	0.11207	570	0.27986
571	0.02928	571	0.09113	571	0.10799	571	0.29292
572	0.03076	572	0.08928	572	0.10327	572	0.27985
573	0.02919	573	0.08793	573	0.09529	573	0.28799
574	0.02763	574	0.08578	574	0.09513	574	0.28189
575	0.02742	575	0.08517	575	0.09325	575	0.27349
576	0.02683	576	0.08412	576	0.09243	576	0.25597
577	0.02745	577	0.08774	577	0.09388	577	0.2645
578	0.02489	578	0.08482	578	0.08742	578	0.26142
579	0.02435	579	0.07362	579	0.08863	579	0.26011
580	0.02199	580	0.0759	580	0.08332	580	0.23915
581	0.02179	581	0.07604	581	0.08876	581	0.23011
582	0.0217	582	0.06892	582	0.07983	582	0.24076
583	0.01949	583	0.07495	583	0.08795	583	0.23994
584	0.02101	584	0.06888	584	0.08116	584	0.24394
585	0.01971	585	0.07096	585	0.07388	585	0.20309
586	0.01719	586	0.06915	586	0.07574	586	0.2143
587	0.01851	587	0.06598	587	0.07443	587	0.22075
588	0.01835	588	0.06738	588	0.07651	588	0.22425
589	0.01731	589	0.06231	589	0.0735	589	0.18868
590	0.01621	590	0.05986	590	0.06947	590	0.21311
591	0.01653	591	0.06247	591	0.07119	591	0.2088
592	0.01671	592	0.06185	592	0.06447	592	0.19187
593	0.01591	593	0.05925	593	0.06755	593	0.17659
594	0.01411	594	0.05482	594	0.06296	594	0.17792
595	0.01221	595	0.05001	595	0.06354	595	0.16901
596	0.01327	596	0.05028	596	0.06084	596	0.18025
597	0.01207	597	0.05355	597	0.06738	597	0.16441
598	0.01339	598	0.05216	598	0.06004	598	0.17221
599	0.01218	599	0.05197	599	0.0577	599	0.16937
600	0.01326	600	0.05067	600	0.05639	600	0.16794
601	0.01199	601	0.04919	601	0.05817	601	0.16717
602	0.01245	602	0.04953	602	0.05367	602	0.15359
603	0.01128	603	0.04879	603	0.05939	603	0.1573
604	0.01241	604	0.04987	604	0.05039	604	0.17038
605	0.01157	605	0.04215	605	0.05749	605	0.16279
606	0.01288	606	0.04435	606	0.05333	606	0.18127
607	0.01236	607	0.04393	607	0.05425	607	0.17468
608	0.01028	608	0.04445	608	0.04863	608	0.15004
609	0.00808	609	0.04064	609	0.05146	609	0.13968
610	0.00843	610	0.03494	610	0.05349	610	0.11966
611	0.00985	611	0.04139	611	0.04617	611	0.14222
612	0.0076	612	0.03901	612	0.04416	612	0.12605
613	0.00866	613	0.03557	613	0.0439	613	0.1181
614	0.00725	614	0.04086	614	0.04627	614	0.12179
615	0.00841	615	0.03784	615	0.04279	615	0.1274
616	0.00917	616	0.0344	616	0.04094	616	0.13017
617	0.00848	617	0.03408	617	0.04611	617	0.11159
618	0.007	618	0.03124	618	0.04079	618	0.111
619	0.00655	619	0.03393	619	0.0362	619	0.12059
620	0.00607	620	0.03406	620	0.04485	620	0.12712
621	0.00775	621	0.03566	621	0.04171	621	0.10686
622	0.00693	622	0.03066	622	0.044	622	0.12318
623	0.00743	623	0.03104	623	0.03974	623	0.11141
624	0.00664	624	0.03403	624	0.04146	624	0.12946
625	0.00606	625	0.03257	625	0.04005	625	0.10961
626	0.00842	626	0.03025	626	0.03111	626	0.10356
627	0.00459	627	0.0277	627	0.03839	627	0.1089
628	0.00611	628	0.03251	628	0.03781	628	0.10844
629	0.00736	629	0.02732	629	0.03453	629	0.10072
630	0.00586	630	0.02552	630	0.03428	630	0.10577
631	0.00661	631	0.02964	631	0.0294	631	0.08787
632	0.00517	632	0.02939	632	0.03578	632	0.09803
633	0.0057	633	0.03066	633	0.03479	633	0.09957
634	0.00586	634	0.0266	634	0.03366	634	0.08416
635	0.00785	635	0.02677	635	0.04071	635	0.08686
636	0.00685	636	0.02495	636	0.03147	636	0.08554
637	0.00541	637	0.02464	637	0.03211	637	0.08486
638	0.00523	638	0.02789	638	0.02665	638	0.09182
639	0.0049	639	0.02101	639	0.02873	639	0.09584
640	0.00548	640	0.02345	640	0.02707	640	0.08646
641	0.00423	641	0.02104	641	0.03016	641	0.08957
642	0.0039	642	0.02266	642	0.02753	642	0.0787
643	0.00419	643	0.02629	643	0.02684	643	0.08717
644	0.00583	644	0.02467	644	0.02567	644	0.09246
645	0.00362	645	0.02034	645	0.02779	645	0.08255
646	0.00473	646	0.0219	646	0.02433	646	0.09316
647	0.00491	647	0.02231	647	0.02652	647	0.08209
648	0.00386	648	0.02269	648	0.02848	648	0.07743
649	0.00349	649	0.02236	649	0.02256	649	0.08419
650	0.00592	650	0.02157	650	0.02426	650	0.09937
651	0.0044	651	0.02443	651	0.02441	651	0.09161
652	0.00489	652	0.02194	652	0.02717	652	0.08854
653	0.0045	653	0.02279	653	0.02161	653	0.08448
654	0.00602	654	0.02435	654	0.02161	654	0.08658
655	0.00326	655	0.02008	655	0.02634	655	0.0763
656	0.00524	656	0.01803	656	0.02115	656	0.08348
657	0.00303	657	0.01799	657	0.01916	657	0.08018
658	0.00429	658	0.02095	658	0.02498	658	0.07807
659	0.00556	659	0.01774	659	0.02759	659	0.07149
660	0.00561	660	0.01877	660	0.02206	660	0.08144
661	0.00426	661	0.01909	661	0.02299	661	0.07444
662	0.00705	662	0.01944	662	0.02374	662	0.06649
663	0.00355	663	0.01487	663	0.01972	663	0.06172
664	0.0036	664	0.01381	664	0.02234	664	0.08144
665	0.00396	665	0.01594	665	0.02277	665	0.08071
666	0.00499	666	0.01748	666	0.02225	666	0.07129
667	0.00524	667	0.01603	667	0.02308	667	0.06258
668	0.00409	668	0.0155	668	0.0203	668	0.06746
669	0.0031	669	0.01388	669	0.02154	669	0.07651
670	0.00365	670	0.01493	670	0.02019	670	0.04543
671	0.00407	671	0.01584	671	0.02148	671	0.06613
672	0.00338	672	0.01858	672	0.01457	672	0.05333
673	0.00271	673	0.01778	673	0.01903	673	0.05941
674	0.00365	674	0.0149	674	0.01707	674	0.05707
675	0.00258	675	0.01582	675	0.02028	675	0.06714
676	0.00299	676	0.01602	676	0.01803	676	0.05288
677	0.00302	677	0.01422	677	0.02022	677	0.05207
678	0.00191	678	0.01377	678	0.01904	678	0.04815
679	0.00347	679	0.0125	679	0.01233	679	0.03961
680	0.000789298	680	0.01135	680	0.01235	680	0.02953
681	0.000599474	681	0.01124	681	0.01008	681	0.03465
682	0.00121	682	0.00951	682	0.01438	682	0.02797
683	0.000816626	683	0.01006	683	0.00729	683	0.03323
684	0.000826953	684	0.00756	684	0.01172	684	0.03729
685	0.00105	685	0.00633	685	0.01026	685	0.02828
686	0.000843103	686	0.0093	686	0.00912	686	0.02925
687	0.000428281	687	0.00829	687	0.01053	687	0.02508
688	0.000650628	688	0.00818	688	0.01161	688	0.03392
689	0.000876717	689	0.00411	689	0.00911	689	0.0258
690	0.000667681	690	0.00811	690	0.00755	690	0.03223
691	0.000897305	691	0.00751	691	0.00733	691	0.02636
692	0.00136	692	0.00806	692	0.01184	692	0.02438
693	0.000228699	693	0.00697	693	0.00649	693	0.01755
694	0.0014	694	0.008	694	0.00728	694	0.0185
695	0.000471397	695	0.00445	695	0.00631	695	0.02119
696	0.000237904	696	0.00648	696	0.00852	696	0.01984
697	0.0012	697	0.00532	697	0.00934	697	0.02094
698	0.000734311	698	0.00588	698	0.00545	698	0.01611
699	0	699	0.0057	699	0.00734	699	0.01794
700	0.002	700	0.00706	700	0.00481	700	0.0268
701	0.000505179	701	0.00608	701	0.00867	701	0.02719
702	0.00076838	702	0.00641	702	0.01141	702	0.0187
703	0.000517647	703	0.00676	703	0.00845	703	0.02237
704	0	704	0.01125	704	0.00698	704	0.02541
705	0.00106	705	0.00693	705	0.00594	705	0.02396
706	0.00080839	706	0.00506	706	0.0044	706	0.02146
707	0.000817757	707	0.00742	707	0.00769	707	0.03025
708	0.00137	708	0.00634	708	0.00492	708	0.02385
709	0.000836544	709	0.007	709	0.00622	709	0.0155
710	0.000282893	710	0.00325	710	0.00717	710	0.0157
711	0	711	0.0039	711	0.00723	711	0.01488
712	0.00028862	712	0.00304	712	0.00644	712	0.02112
713	0	713	0.00399	713	0.00743	713	0.01531
714	0.00208	714	0.00342	714	0.00838	714	0.02061
715	0.0021	715	0.00661	715	0.00985	715	0.01252
716	0.000912673	716	0.00319	716	0.0077	716	0.02111
717	0.00154	717	0.00515	717	0.00552	717	0.01605
718	0.000312264	718	0.00557	718	0.00559	718	0.0141
719	0.000634888	719	0.00365	719	0.00329	719	0.01643
720	0.000962272	720	0.00704	720	0.00617	720	0.0111
721	0.000648383	721	0.00474	721	0.00578	721	0.01238
722	0.000327172	722	0.00584	722	0.00633	722	0.01937
723	0.00166	723	0.00348	723	0.00592	723	0.0242
724	0.000337297	724	0.00352	724	0.00551	724	0.01281
725	0.00102	725	0.00321	725	0.00759	725	0.01421
726	0.000690025	726	0.00434	726	0.00615	726	0.01557
727	0.000348154	727	0.00439	727	0.0078	727	0.01212
728	0.000708855	728	0.00445	728	0.00528	728	0.02088
729	0.00143	729	0.00377	729	0.00586	729	0.01742
730	0.000362407	730	0.00304	730	0.00431	730	0.02147
731	0	731	0.00346	731	0.00713	731	0.01783
732	0.000745316	732	0.00545	732	0.00389	732	0.01287
733	0.00227	733	0.00236	733	0.00451	733	0.01576
734	0.00153	734	0.00801	734	0.00341	734	0.01325
735	0.000385988	735	0.00323	735	0.00923	735	0.02017
736	0.000783463	736	0.00451	736	0.00876	736	0.01496
737	0	737	0.00291	737	0.00353	737	0.00824
738	0.000804047	738	0.00504	738	0.00597	738	0.0126
739	0.000407293	739	0.00382	739	0.00181	739	0.01274
740	0.000411973	740	0.00302	740	0.00492	740	0.01147
741	0.00125	741	0.00526	741	0.00124	741	0.01886
742	0	742	0.00398	742	0.00567	742	0.01322
743	0.00172	743	0.00225	743	0.00445	743	0.01193
744	0	744	0.00319	744	0.00324	744	0.01816
745	0	745	0.00415	745	0.00197	745	0.00918
746	0	746	0.00233	746	0.0053	746	0.02012
747	0.000902131	747	0.000945778	747	0.00336	747	0.01255
748	0.000457104	748	0.00384	748	0.00408	748	0.0158
749	0.000464344	749	0.000484839	749	0.00552	749	0.01129
750	0.000469618	750	0.00295	750	0.00701	750	0.0065
751	0.00142	751	0.0035	751	0.00285	751	0.01814
752	0	752	0.00303	752	0.00215	752	0.02675
753	0.000487754	753	0.0046	753	0.00363	753	0.00169
754	0.000493616	754	0.00258	754	0.00367	754	0.01027
755	0.0025	755	0.00314	755	0.00149	755	0.01388
756	0.00101	756	0.00266	756	0.00451	756	0.0158
757	0	757	0.00215	757	0.00306	757	0.0142
758	0	758	0.00381	758	0.00232	758	0.01982
759	0.00105	759	0.0022	759	0.00706	759	0.02006
760	0	760	0.00281	760	0.000794722	760	0.01483
761	0.00108	761	0.00454	761	0.00725	761	0.01125
762	0.00164	762	0.00115	762	0.00409	762	0.01142
763	0.00055684	763	0.00291	763	0.000828543	763	0.01154
764	0.00113	764	0.00118	764	0.00335	764	0.00974
765	0.000568861	765	0.00119	765	0.00424	765	0.01775
766	0.00231	766	0.00121	766	0.00517	766	0.01602
767	0.000585225	767	0.00367	767	0.00521	767	0.01416
768	0.000592876	768	0.00248	768	0.000882436	768	0.00819
769	0.00299	769	0.00376	769	0.00357	769	0.01455
770	0.000607473	770	0.00318	770	0.00272	770	0.01052
771	0.00123	771	0.00388	771	0.00366	771	0.01919
772	0.000626081	772	0.000653182	772	0.00279	772	0.01075
773	0.00127	773	0.00132	773	0.00282	773	0.00873
774	0.00128	774	0.00134	774	0.00286	774	0.00665
775	0.000647938	775	0.00407	775	0.00579	775	0.00671
776	0.00329	776	0.00414	776	0.00878	776	0.00453
777	0.00133	777	0.00279	777	0.00396	777	0.01379
778	0	778	0.00212	778	0.00201	778	0.01167
779	0.00275	779	0.00861	779	0.00407	779	0.00236
780	0.00139	780	0.00436	780	0.00207	780	0.00239
781	0	781	0.00221	781	0.00417	781	0.0097
782	0.00214	782	0.00373	782	0.00106	782	0.00986
783	0	783	0.00151	783	0.00215	783	0.00746
784	0.000732538	784	0.00459	784	0.00654	784	0.00757
785	0	785	0.00465	785	0.0055	785	0.00765
786	0	786	0.00235	786	0	786	0.00518
787	0.000758331	787	0.000795182	787	0.00113	787	0.01051
788	0.00232	788	0.00404	788	0.00573	788	0.02391
789	0.00156	789	0.000816007	789	0.00696	789	0.00268
790	0.00238	790	0.00165	790	0.00235	790	0
791	0.0016	791	0.00417	791	0.00238	791	0.00551
792	0.000813171	792	0.0017	792	0.0036	792	0.00559
793	0.00247	793	0.000860597	793	0.00122	793	0.00566
794	0.00334	794	0.000869869	794	0.00372	794	0.01142
795	0.00168	795	0.00265	795	0.00376	795	0.00868
796	0.00171	796	0.00179	796	0.00381	796	0.00587
797	0	797	0.000908414	797	0.00901	797	0.01484
798	0.000874662	798	0	798	0.00391	798	0.01205
799	0.00266	799	0.00185	799	0.00132	799	0.02125
800	0.000897398	800	0.00187	800	0	800	0.00616

## Sheet: Figure 4b
TCA-CHCl3		TCA-CHBr3		TCA-CHI3		TCA-NH4
X	Y	X	Y	X	Y	X	Y
0	1	0	0	0	0	0	1
0.19531	0	0.48828	0	0.19531	0	0.48828	1
0.39063	2	0.97656	1	0.39063	1	0.97656	0
0.58594	1	1.46484	1	0.58594	1	1.46484	4
0.78125	1	1.95313	2	0.78125	0	1.95313	1
0.97656	1	2.44141	1	0.97656	2	2.44141	1
1.17188	1	2.92969	2	1.17188	0	2.92969	1
1.36719	1	3.41797	1	1.36719	0	3.41797	0
1.5625	3	3.90625	1	1.5625	1	3.90625	3
1.75781	3	4.39453	1	1.75781	2	4.39453	0
1.95313	0	4.88281	1	1.95313	1	4.88281	2
2.14844	4	5.37109	1	2.14844	1	5.37109	1
2.34375	2	5.85938	0	2.34375	1	5.85938	2
2.53906	0	6.34766	1	2.53906	0	6.34766	1
2.73438	1	6.83594	0	2.73438	0	6.83594	1
2.92969	2	7.32422	1	2.92969	2	7.32422	2
3.125	3	7.8125	0	3.125	0	7.8125	4
3.32031	2	8.30078	0	3.32031	0	8.30078	3
3.51563	2	8.78906	1	3.51563	0	8.78906	0
3.71094	2	9.27734	1	3.71094	0	9.27734	0
3.90625	1	9.76563	6	3.90625	0	9.76563	3
4.10156	3	10.2539	37	4.10156	0	10.2539	33
4.29688	0	10.7422	167	4.29688	4	10.7422	135
4.49219	0	11.2305	433	4.49219	0	11.2305	439
4.6875	5	11.7188	828	4.6875	1	11.7188	781
4.88281	4	12.207	1000	4.88281	1	12.207	990
5.07813	12	12.6953	933	5.07813	0	12.6953	1000
5.27344	22	13.1836	771	5.27344	1	13.1836	854
5.46875	48	13.6719	534	5.46875	0	13.6719	694
5.66406	74	14.1602	406	5.66406	0	14.1602	542
5.85938	131	14.6484	293	5.85938	0	14.6484	431
6.05469	231	15.1367	169	6.05469	0	15.1367	308
6.25	357	15.625	135	6.25	2	15.625	281
6.44531	526	16.1133	96	6.44531	2	16.1133	212
6.64063	623	16.6016	91	6.64063	1	16.6016	179
6.83594	773	17.0898	82	6.83594	2	17.0898	124
7.03125	870	17.5781	56	7.03125	0	17.5781	105
7.22656	960	18.0664	43	7.22656	2	18.0664	93
7.42188	1000	18.5547	33	7.42188	0	18.5547	65
7.61719	928	19.043	31	7.61719	0	19.043	57
7.8125	918	19.5312	19	7.8125	0	19.5312	51
8.00781	891	20.0195	28	8.00781	2	20.0195	51
8.20313	842	20.5078	16	8.20313	0	20.5078	27
8.39844	765	20.9961	14	8.39844	4	20.9961	31
8.59375	665	21.4844	12	8.59375	8	21.4844	23
8.78906	600	21.9727	8	8.78906	18	21.9727	13
8.98438	509	22.4609	7	8.98438	48	22.4609	12
9.17969	504	22.9492	3	9.17969	84	22.9492	19
9.375	446	23.4375	5	9.375	116	23.4375	12
9.57031	373	23.9258	11	9.57031	221	23.9258	12
9.76563	372	24.4141	5	9.76563	335	24.4141	8
9.96094	308	24.9023	4	9.96094	507	24.9023	12
10.1562	308	25.3906	3	10.1562	643	25.3906	5
10.3516	245	25.8789	8	10.3516	777	25.8789	9
10.5469	224	26.3672	5	10.5469	907	26.3672	4
10.7422	226	26.8555	4	10.7422	1000	26.8555	3
10.9375	201	27.3438	3	10.9375	852	27.3438	5
11.1328	157	27.832	4	11.1328	921	27.832	6
11.3281	154	28.3203	5	11.3281	895	28.3203	3
11.5234	144	28.8086	4	11.5234	780	28.8086	5
11.7188	115	29.2969	1	11.7188	727	29.2969	4
11.9141	101	29.7852	3	11.9141	661	29.7852	4
12.1094	93	30.2734	1	12.1094	636	30.2734	4
12.3047	103	30.7617	3	12.3047	556	30.7617	2
12.5	79	31.25	1	12.5	493	31.25	3
12.6953	74	31.7383	2	12.6953	472	31.7383	4
12.8906	62	32.2266	1	12.8906	408	32.2266	2
13.0859	62	32.7148	1	13.0859	365	32.7148	1
13.2812	68	33.2031	3	13.2812	359	33.2031	1
13.4766	43	33.6914	2	13.4766	330	33.6914	2
13.6719	59	34.1797	3	13.6719	264	34.1797	1
13.8672	40	34.668	4	13.8672	207	34.668	0
14.0625	45	35.1562	3	14.0625	229	35.1562	0
14.2578	30	35.6445	4	14.2578	180	35.6445	0
14.4531	42	36.1328	1	14.4531	195	36.1328	2
14.6484	38	36.6211	2	14.6484	173	36.6211	1
14.8438	25	37.1094	3	14.8438	167	37.1094	3
15.0391	36	37.5977	5	15.0391	150	37.5977	2
15.2344	29	38.0859	2	15.2344	149	38.0859	4
15.4297	24	38.5742	2	15.4297	124	38.5742	1
15.625	22	39.0625	1	15.625	140	39.0625	2
15.8203	27	39.5508	2	15.8203	120	39.5508	3
16.0156	33	40.0391	1	16.0156	115	40.0391	0
16.2109	20	40.5273	2	16.2109	81	40.5273	2
16.4062	27	41.0156	0	16.4062	87	41.0156	0
16.6016	20	41.5039	4	16.6016	82	41.5039	2
16.7969	21	41.9922	1	16.7969	73	41.9922	1
16.9922	17	42.4805	1	16.9922	72	42.4805	2
17.1875	17	42.9688	1	17.1875	69	42.9688	0
17.3828	15	43.457	2	17.3828	66	43.457	0
17.5781	13	43.9453	1	17.5781	62	43.9453	1
17.7734	10	44.4336	0	17.7734	51	44.4336	4
17.9688	11	44.9219	2	17.9688	60	44.9219	0
18.1641	20	45.4102	1	18.1641	52	45.4102	2
18.3594	13	45.8984	1	18.3594	42	45.8984	1
18.5547	14	46.3867	2	18.5547	43	46.3867	1
18.75	11	46.875	0	18.75	37	46.875	3
18.9453	8	47.3633	1	18.9453	38	47.3633	0
19.1406	15	47.8516	0	19.1406	48	47.8516	3
19.3359	10	48.3398	2	19.3359	33	48.3398	5
19.5312	7	48.8281	1	19.5312	31	48.8281	1
19.7266	13	49.3164	0	19.7266	32	49.3164	1
19.9219	10	49.8047	2	19.9219	26	49.8047	0
20.1172	6	50.293	2	20.1172	21	50.293	0
20.3125	11	50.7812	0	20.3125	25	50.7812	0
20.5078	9	51.2695	1	20.5078	28	51.2695	3
20.7031	6	51.7578	1	20.7031	26	51.7578	2
20.8984	11	52.2461	0	20.8984	17	52.2461	1
21.0938	5	52.7344	1	21.0938	20	52.7344	2
21.2891	5	53.2227	2	21.2891	22	53.2227	0
21.4844	2	53.7109	3	21.4844	22	53.7109	2
21.6797	4	54.1992	0	21.6797	23	54.1992	2
21.875	13	54.6875	1	21.875	17	54.6875	0
22.0703	6	55.1758	1	22.0703	13	55.1758	2
22.2656	4	55.6641	0	22.2656	22	55.6641	1
22.4609	10	56.1523	1	22.4609	17	56.1523	2
22.6562	5	56.6406	1	22.6562	17	56.6406	1
22.8516	4	57.1289	2	22.8516	19	57.1289	2
23.0469	5	57.6172	0	23.0469	13	57.6172	1
23.2422	5	58.1055	2	23.2422	10	58.1055	1
23.4375	2	58.5938	0	23.4375	19	58.5938	2
23.6328	12	59.082	3	23.6328	11	59.082	4
23.8281	4	59.5703	2	23.8281	15	59.5703	1
24.0234	5	60.0586	3	24.0234	7	60.0586	1
24.2188	7	60.5469	2	24.2188	8	60.5469	1
24.4141	6	61.0352	1	24.4141	11	61.0352	0
24.6094	2	61.5234	1	24.6094	7	61.5234	3
24.8047	2	62.0117	0	24.8047	5	62.0117	1
25	0	62.5	2	25	6	62.5	1
25.1953	5	62.9883	0	25.1953	10	62.9883	2
25.3906	3	63.4766	1	25.3906	7	63.4766	1
25.5859	3	63.9648	2	25.5859	12	63.9648	0
25.7812	3	64.4531	1	25.7812	3	64.4531	2
25.9766	5	64.9414	1	25.9766	3	64.9414	1
26.1719	1	65.4297	2	26.1719	6	65.4297	1
26.3672	5	65.918	3	26.3672	9	65.918	0
26.5625	6	66.4062	1	26.5625	7	66.4062	0
26.7578	4	66.8945	2	26.7578	4	66.8945	1
26.9531	6	67.3828	0	26.9531	6	67.3828	1
27.1484	4	67.8711	0	27.1484	5	67.8711	1
27.3438	3	68.3594	0	27.3438	7	68.3594	2
27.5391	4	68.8477	0	27.5391	3	68.8477	1
27.7344	2	69.3359	1	27.7344	4	69.3359	1
27.9297	2	69.8242	1	27.9297	4	69.8242	2
28.125	3	70.3125	2	28.125	8	70.3125	1
28.3203	4	70.8008	3	28.3203	6	70.8008	1
28.5156	2	71.2891	1	28.5156	3	71.2891	1
28.7109	5	71.7773	2	28.7109	4	71.7773	1
28.9062	1	72.2656	1	28.9062	4	72.2656	1
29.1016	2	72.7539	3	29.1016	9	72.7539	1
29.2969	1	73.2422	1	29.2969	8	73.2422	1
29.4922	3	73.7305	1	29.4922	5	73.7305	4
29.6875	2	74.2188	0	29.6875	6	74.2188	2
29.8828	2	74.707	0	29.8828	3	74.707	1
30.0781	2	75.1953	4	30.0781	2	75.1953	0
30.2734	0	75.6836	4	30.2734	6	75.6836	1
30.4688	1	76.1719	0	30.4688	4	76.1719	4
30.6641	2	76.6602	1	30.6641	1	76.6602	1
30.8594	2	77.1484	0	30.8594	3	77.1484	0
31.0547	3	77.6367	1	31.0547	3	77.6367	1
31.25	2	78.125	1	31.25	1	78.125	2
31.4453	4	78.6133	1	31.4453	5	78.6133	1
31.6406	0	79.1016	1	31.6406	5	79.1016	2
31.8359	1	79.5898	0	31.8359	0	79.5898	0
32.0312	3	80.0781	1	32.0312	7	80.0781	1
32.2266	1	80.5664	1	32.2266	6	80.5664	1
32.4219	2	81.0547	2	32.4219	2	81.0547	4
32.6172	0	81.543	1	32.6172	3	81.543	1
32.8125	0	82.0312	1	32.8125	4	82.0312	2
33.0078	2	82.5195	3	33.0078	2	82.5195	5
33.2031	3	83.0078	2	33.2031	1	83.0078	0
33.3984	1	83.4961	0	33.3984	2	83.4961	2
33.5938	4	83.9844	2	33.5938	0	83.9844	1
33.7891	1	84.4727	3	33.7891	2	84.4727	2
33.9844	0	84.9609	0	33.9844	4	84.9609	1
34.1797	2	85.4492	0	34.1797	0	85.4492	4
34.375	3	85.9375	0	34.375	1	85.9375	2
34.5703	4	86.4258	0	34.5703	1	86.4258	0
34.7656	0	86.9141	0	34.7656	5	86.9141	3
34.9609	0	87.4023	0	34.9609	2	87.4023	0
35.1562	1	87.8906	2	35.1562	3	87.8906	2
35.3516	0	88.3789	2	35.3516	1	88.3789	1
35.5469	2	88.8672	0	35.5469	2	88.8672	0
35.7422	3	89.3555	0	35.7422	0	89.3555	3
35.9375	0	89.8438	0	35.9375	1	89.8438	1
36.1328	4	90.332	0	36.1328	0	90.332	1
36.3281	1	90.8203	2	36.3281	2	90.8203	0
36.5234	0	91.3086	1	36.5234	2	91.3086	0
36.7188	0	91.7969	0	36.7188	2	91.7969	1
36.9141	0	92.2852	1	36.9141	1	92.2852	0
37.1094	1	92.7734	0	37.1094	0	92.7734	1
37.3047	2	93.2617	1	37.3047	1	93.2617	0
37.5	2	93.75	2	37.5	0	93.75	0
37.6953	1	94.2383	2	37.6953	1	94.2383	0
37.8906	1	94.7266	2	37.8906	1	94.7266	1
38.0859	0	95.2148	0	38.0859	1	95.2148	0
38.2812	1	95.7031	0	38.2812	2	95.7031	0
38.4766	2	96.1914	0	38.4766	1	96.1914	4
38.6719	1	96.6797	0	38.6719	2	96.6797	1
38.8672	1	97.168	2	38.8672	1	97.168	1
39.0625	1	97.6562	1	39.0625	0	97.6562	0
39.2578	2	98.1445	0	39.2578	3	98.1445	0
39.4531	0	98.6328	0	39.4531	1	98.6328	1
39.6484	1	99.1211	3	39.6484	1	99.1211	0
39.8438	2	99.6094	0	39.8438	1	99.6094	0
40.0391	3	100.098	0	40.0391	1	100.098	1
40.2344	0	100.586	1	40.2344	2	100.586	0
40.4297	3	101.074	0	40.4297	2	101.074	1
40.625	2	101.562	1	40.625	1	101.562	2
40.8203	2	102.051	0	40.8203	0	102.051	2
41.0156	0	102.539	1	41.0156	2	102.539	1
41.2109	1	103.027	1	41.2109	1	103.027	1
41.4062	4	103.516	0	41.4062	1	103.516	1
41.6016	2	104.004	0	41.6016	2	104.004	3
41.7969	1	104.492	0	41.7969	2	104.492	1
41.9922	1	104.98	1	41.9922	1	104.98	0
42.1875	2	105.469	0	42.1875	1	105.469	1
42.3828	3	105.957	1	42.3828	0	105.957	0
42.5781	2	106.445	2	42.5781	2	106.445	0
42.7734	0	106.934	1	42.7734	3	106.934	2
42.9688	0	107.422	0	42.9688	0	107.422	1
43.1641	1	107.91	0	43.1641	1	107.91	1
43.3594	3	108.398	0	43.3594	2	108.398	0
43.5547	2	108.887	3	43.5547	3	108.887	1
43.75	1	109.375	2	43.75	1	109.375	0
43.9453	0	109.863	1	43.9453	1	109.863	1
44.1406	3	110.352	3	44.1406	2	110.352	2
44.3359	1	110.84	1	44.3359	0	110.84	1
44.5312	1	111.328	0	44.5312	0	111.328	1
44.7266	2	111.816	0	44.7266	0	111.816	0
44.9219	3	112.305	0	44.9219	0	112.305	2
45.1172	1	112.793	0	45.1172	1	112.793	0
45.3125	0	113.281	1	45.3125	0	113.281	0
45.5078	0	113.77	1	45.5078	0	113.77	1
45.7031	0	114.258	1	45.7031	1	114.258	0
45.8984	0	114.746	1	45.8984	0	114.746	1
46.0938	2	115.234	1	46.0938	1	115.234	2
46.2891	2	115.723	1	46.2891	0	115.723	2
46.4844	0	116.211	3	46.4844	4	116.211	2
46.6797	0	116.699	0	46.6797	1	116.699	3
46.875	1	117.188	2	46.875	0	117.188	1
47.0703	4	117.676	2	47.0703	0	117.676	0
47.2656	0	118.164	1	47.2656	2	118.164	1
47.4609	1	118.652	3	47.4609	1	118.652	3
47.6562	1	119.141	2	47.6562	1	119.141	0
47.8516	0	119.629	0	47.8516	1	119.629	1
48.0469	2	120.117	0	48.0469	0	120.117	0
48.2422	1	120.605	1	48.2422	4	120.605	3
48.4375	1	121.094	0	48.4375	1	121.094	1
48.6328	4	121.582	0	48.6328	0	121.582	2
48.8281	1	122.07	0	48.8281	0	122.07	3
49.0234	0	122.559	0	49.0234	0	122.559	1
49.2188	3	123.047	0	49.2188	1	123.047	0
49.4141	2	123.535	1	49.4141	0	123.535	0
49.6094	0	124.023	1	49.6094	3	124.023	1
49.8047	1	124.512	0	49.8047	2	124.512	1
50	2	125	2	50	1	125	0
50.1953	0	125.488	1	50.1953	0	125.488	2
50.3906	0	125.977	0	50.3906	0	125.977	0
50.5859	0	126.465	1	50.5859	1	126.465	1
50.7812	0	126.953	1	50.7812	0	126.953	1
50.9766	3	127.441	3	50.9766	2	127.441	2
51.1719	1	127.93	2	51.1719	1	127.93	2
51.3672	2	128.418	0	51.3672	1	128.418	2
51.5625	1	128.906	1	51.5625	0	128.906	0
51.7578	1	129.395	0	51.7578	0	129.395	1
51.9531	1	129.883	1	51.9531	2	129.883	0
52.1484	2	130.371	2	52.1484	2	130.371	1
52.3438	1	130.859	0	52.3438	2	130.859	2
52.5391	2	131.348	1	52.5391	3	131.348	0
52.7344	2	131.836	1	52.7344	1	131.836	0
52.9297	2	132.324	2	52.9297	2	132.324	0
53.125	0	132.812	1	53.125	2	132.812	0
53.3203	0	133.301	0	53.3203	1	133.301	2
53.5156	1	133.789	4	53.5156	1	133.789	0
53.7109	0	134.277	0	53.7109	1	134.277	1
53.9062	2	134.766	1	53.9062	2	134.766	0
54.1016	2	135.254	1	54.1016	3	135.254	1
54.2969	2	135.742	2	54.2969	2	135.742	2
54.4922	1	136.23	0	54.4922	0	136.23	0
54.6875	1	136.719	0	54.6875	1	136.719	0
54.8828	2	137.207	2	54.8828	2	137.207	2
55.0781	0	137.695	2	55.0781	0	137.695	2
55.2734	1	138.184	0	55.2734	0	138.184	1
55.4688	1	138.672	1	55.4688	0	138.672	2
55.6641	1	139.16	2	55.6641	1	139.16	1
55.8594	2	139.648	1	55.8594	1	139.648	2
56.0547	2	140.137	2	56.0547	0	140.137	0
56.25	1	140.625	1	56.25	2	140.625	0
56.4453	1	141.113	2	56.4453	2	141.113	2
56.6406	2	141.602	1	56.6406	1	141.602	2
56.8359	0	142.09	3	56.8359	0	142.09	0
57.0312	1	142.578	1	57.0312	0	142.578	2
57.2266	0	143.066	1	57.2266	6	143.066	3
57.4219	1	143.555	2	57.4219	0	143.555	1
57.6172	1	144.043	1	57.6172	0	144.043	4
57.8125	1	144.531	1	57.8125	1	144.531	0
58.0078	1	145.02	1	58.0078	3	145.02	0
58.2031	0	145.508	0	58.2031	1	145.508	2
58.3984	2	145.996	2	58.3984	2	145.996	0
58.5938	0	146.484	1	58.5938	1	146.484	1
58.7891	2	146.973	2	58.7891	0	146.973	2
58.9844	1	147.461	0	58.9844	1	147.461	0
59.1797	2	147.949	3	59.1797	0	147.949	2
59.375	0	148.438	0	59.375	0	148.438	0
59.5703	0	148.926	0	59.5703	0	148.926	0
59.7656	0	149.414	0	59.7656	0	149.414	0
59.9609	3	149.902	0	59.9609	1	149.902	3
60.1562	0	150.391	0	60.1562	0	150.391	1
60.3516	1	150.879	0	60.3516	1	150.879	1
60.5469	2	151.367	0	60.5469	1	151.367	1
60.7422	1	151.855	1	60.7422	1	151.855	1
60.9375	0	152.344	0	60.9375	2	152.344	0
61.1328	1	152.832	1	61.1328	1	152.832	1
61.3281	1	153.32	1	61.3281	0	153.32	0
61.5234	0	153.809	1	61.5234	0	153.809	1
61.7188	1	154.297	0	61.7188	0	154.297	2
61.9141	2	154.785	1	61.9141	1	154.785	2
62.1094	2	155.273	0	62.1094	0	155.273	1
62.3047	3	155.762	1	62.3047	1	155.762	2
62.5	0	156.25	0	62.5	1	156.25	0
62.6953	1	156.738	2	62.6953	1	156.738	1
62.8906	3	157.227	0	62.8906	3	157.227	4
63.0859	0	157.715	1	63.0859	1	157.715	1
63.2812	0	158.203	1	63.2812	2	158.203	1
63.4766	1	158.691	4	63.4766	0	158.691	1
63.6719	0	159.18	0	63.6719	0	159.18	0
63.8672	1	159.668	1	63.8672	1	159.668	1
64.0625	2	160.156	2	64.0625	0	160.156	1
64.2578	0	160.645	2	64.2578	2	160.645	1
64.4531	0	161.133	2	64.4531	2	161.133	2
64.6484	1	161.621	1	64.6484	1	161.621	2
64.8438	0	162.109	1	64.8438	1	162.109	0
65.0391	1	162.598	0	65.0391	1	162.598	0
65.2344	0	163.086	1	65.2344	2	163.086	2
65.4297	2	163.574	2	65.4297	0	163.574	0
65.625	0	164.062	0	65.625	1	164.062	0
65.8203	2	164.551	3	65.8203	1	164.551	0
66.0156	1	165.039	1	66.0156	1	165.039	0
66.2109	2	165.527	4	66.2109	1	165.527	1
66.4062	0	166.016	1	66.4062	0	166.016	2
66.6016	2	166.504	1	66.6016	2	166.504	1
66.7969	1	166.992	1	66.7969	0	166.992	1
66.9922	1	167.48	1	66.9922	2	167.48	1
67.1875	1	167.969	1	67.1875	2	167.969	0
67.3828	2	168.457	0	67.3828	1	168.457	1
67.5781	0	168.945	1	67.5781	0	168.945	0
67.7734	0	169.434	0	67.7734	4	169.434	0
67.9688	2	169.922	1	67.9688	2	169.922	1
68.1641	0	170.41	1	68.1641	1	170.41	2
68.3594	2	170.898	0	68.3594	2	170.898	1
68.5547	2	171.387	0	68.5547	0	171.387	2
68.75	1	171.875	1	68.75	2	171.875	0
68.9453	0	172.363	0	68.9453	0	172.363	1
69.1406	3	172.852	0	69.1406	0	172.852	0
69.3359	1	173.34	0	69.3359	1	173.34	1
69.5312	2	173.828	2	69.5312	1	173.828	2
69.7266	2	174.316	3	69.7266	0	174.316	2
69.9219	1	174.805	1	69.9219	1	174.805	0
70.1172	0	175.293	1	70.1172	1	175.293	2
70.3125	1	175.781	1	70.3125	2	175.781	2
70.5078	0	176.27	3	70.5078	1	176.27	1
70.7031	1	176.758	1	70.7031	1	176.758	1
70.8984	3	177.246	0	70.8984	1	177.246	1
71.0938	2	177.734	2	71.0938	1	177.734	0
71.2891	3	178.223	0	71.2891	1	178.223	4
71.4844	3	178.711	3	71.4844	0	178.711	0
71.6797	0	179.199	0	71.6797	0	179.199	4
71.875	1	179.688	2	71.875	3	179.688	1
72.0703	1	180.176	0	72.0703	2	180.176	2
72.2656	1	180.664	0	72.2656	1	180.664	1
72.4609	0	181.152	0	72.4609	1	181.152	0
72.6562	0	181.641	1	72.6562	2	181.641	0
72.8516	1	182.129	0	72.8516	0	182.129	2
73.0469	0	182.617	2	73.0469	1	182.617	0
73.2422	4	183.105	0	73.2422	1	183.105	1
73.4375	2	183.594	0	73.4375	2	183.594	0
73.6328	1	184.082	2	73.6328	2	184.082	3
73.8281	1	184.57	1	73.8281	1	184.57	1
74.0234	0	185.059	2	74.0234	2	185.059	3
74.2188	0	185.547	2	74.2188	1	185.547	2
74.4141	1	186.035	1	74.4141	0	186.035	2
74.6094	2	186.523	0	74.6094	0	186.523	1
74.8047	1	187.012	0	74.8047	0	187.012	4
75	1	187.5	0	75	1	187.5	2
75.1953	0	187.988	0	75.1953	1	187.988	2
75.3906	0	188.477	0	75.3906	2	188.477	0
75.5859	3	188.965	2	75.5859	2	188.965	1
75.7812	3	189.453	1	75.7812	0	189.453	0
75.9766	3	189.941	2	75.9766	0	189.941	1
76.1719	2	190.43	1	76.1719	0	190.43	2
76.3672	1	190.918	1	76.3672	0	190.918	1
76.5625	3	191.406	4	76.5625	2	191.406	2
76.7578	3	191.895	1	76.7578	2	191.895	1
76.9531	1	192.383	0	76.9531	0	192.383	2
77.1484	0	192.871	2	77.1484	0	192.871	2
77.3438	3	193.359	3	77.3438	1	193.359	1
77.5391	0	193.848	1	77.5391	0	193.848	3
77.7344	0	194.336	0	77.7344	2	194.336	2
77.9297	2	194.824	3	77.9297	1	194.824	5
78.125	0	195.312	1	78.125	1	195.312	2
78.3203	0	195.801	3	78.3203	0	195.801	2
78.5156	0	196.289	0	78.5156	2	196.289	1
78.7109	1	196.777	0	78.7109	0	196.777	1
78.9062	2	197.266	0	78.9062	1	197.266	2
79.1016	2	197.754	1	79.1016	1	197.754	0
79.2969	2	198.242	1	79.2969	1	198.242	4
79.4922	2	198.73	0	79.4922	0	198.73	0
79.6875	1	199.219	4	79.6875	0	199.219	3
79.8828	0	199.707	0	79.8828	3	199.707	2
80.0781	1	200.195	2	80.0781	0	200.195	2
80.2734	0	200.684	1	80.2734	0	200.684	1
80.4688	1	201.172	1	80.4688	2	201.172	0
80.6641	0	201.66	0	80.6641	1	201.66	3
80.8594	3	202.148	0	80.8594	0	202.148	1
81.0547	0	202.637	0	81.0547	0	202.637	1
81.25	3	203.125	1	81.25	0	203.125	0
81.4453	0	203.613	0	81.4453	0	203.613	0
81.6406	1	204.102	0	81.6406	1	204.102	2
81.8359	0	204.59	1	81.8359	0	204.59	1
82.0312	0	205.078	1	82.0312	0	205.078	1
82.2266	1	205.566	5	82.2266	0	205.566	1
82.4219	1	206.055	1	82.4219	0	206.055	0
82.6172	1	206.543	1	82.6172	2	206.543	1
82.8125	1	207.031	0	82.8125	1	207.031	2
83.0078	0	207.52	1	83.0078	0	207.52	1
83.2031	1	208.008	2	83.2031	1	208.008	0
83.3984	3	208.496	2	83.3984	1	208.496	2
83.5938	1	208.984	1	83.5938	1	208.984	2
83.7891	1	209.473	1	83.7891	0	209.473	0
83.9844	2	209.961	0	83.9844	0	209.961	1
84.1797	1	210.449	1	84.1797	3	210.449	1
84.375	2	210.938	1	84.375	1	210.938	3
84.5703	0	211.426	3	84.5703	1	211.426	3
84.7656	2	211.914	1	84.7656	1	211.914	1
84.9609	0	212.402	0	84.9609	1	212.402	0
85.1562	0	212.891	1	85.1562	1	212.891	1
85.3516	1	213.379	0	85.3516	4	213.379	4
85.5469	3	213.867	0	85.5469	1	213.867	2
85.7422	2	214.355	2	85.7422	0	214.355	2
85.9375	0	214.844	0	85.9375	0	214.844	0
86.1328	0	215.332	0	86.1328	1	215.332	0
86.3281	1	215.82	1	86.3281	0	215.82	0
86.5234	1	216.309	1	86.5234	0	216.309	0
86.7188	0	216.797	3	86.7188	0	216.797	1
86.9141	1	217.285	2	86.9141	1	217.285	1
87.1094	2	217.773	0	87.1094	0	217.773	0
87.3047	2	218.262	1	87.3047	1	218.262	0
87.5	1	218.75	2	87.5	1	218.75	0
87.6953	1	219.238	0	87.6953	4	219.238	2
87.8906	2	219.727	1	87.8906	1	219.727	1
88.0859	0	220.215	1	88.0859	1	220.215	1
88.2812	1	220.703	2	88.2812	1	220.703	1
88.4766	2	221.191	0	88.4766	0	221.191	1
88.6719	1	221.68	2	88.6719	0	221.68	2
88.8672	2	222.168	1	88.8672	1	222.168	1
89.0625	1	222.656	3	89.0625	0	222.656	2
89.2578	1	223.145	0	89.2578	3	223.145	1
89.4531	3	223.633	1	89.4531	3	223.633	0
89.6484	0	224.121	0	89.6484	1	224.121	2
89.8438	0	224.609	2	89.8438	0	224.609	2
90.0391	0	225.098	0	90.0391	2	225.098	2
90.2344	2	225.586	3	90.2344	1	225.586	1
90.4297	1	226.074	3	90.4297	0	226.074	2
90.625	1	226.562	0	90.625	0	226.562	0
90.8203	1	227.051	1	90.8203	0	227.051	1
91.0156	0	227.539	1	91.0156	0	227.539	0
91.2109	0	228.027	0	91.2109	0	228.027	1
91.4062	1	228.516	0	91.4062	1	228.516	1
91.6016	0	229.004	2	91.6016	2	229.004	0
91.7969	2	229.492	2	91.7969	1	229.492	1
91.9922	1	229.98	3	91.9922	2	229.98	0
92.1875	1	230.469	0	92.1875	1	230.469	1
92.3828	1	230.957	0	92.3828	0	230.957	2
92.5781	0	231.445	2	92.5781	0	231.445	0
92.7734	1	231.934	1	92.7734	0	231.934	0
92.9688	1	232.422	1	92.9688	2	232.422	2
93.1641	2	232.91	0	93.1641	1	232.91	1
93.3594	2	233.398	1	93.3594	1	233.398	0
93.5547	0	233.887	1	93.5547	0	233.887	1
93.75	0	234.375	0	93.75	1	234.375	2
93.9453	0	234.863	1	93.9453	1	234.863	2
94.1406	0	235.352	0	94.1406	0	235.352	0
94.3359	0	235.84	0	94.3359	2	235.84	1
94.5312	2	236.328	0	94.5312	0	236.328	2
94.7266	1	236.816	0	94.7266	0	236.816	3
94.9219	0	237.305	1	94.9219	1	237.305	0
95.1172	3	237.793	2	95.1172	0	237.793	4
95.3125	1	238.281	0	95.3125	1	238.281	1
95.5078	1	238.77	0	95.5078	1	238.77	0
95.7031	1	239.258	0	95.7031	0	239.258	0
95.8984	0	239.746	1	95.8984	2	239.746	2
96.0938	1	240.234	2	96.0938	1	240.234	2
96.2891	3	240.723	2	96.2891	0	240.723	1
96.4844	1	241.211	2	96.4844	1	241.211	0
96.6797	4	241.699	0	96.6797	0	241.699	2
96.875	2	242.188	0	96.875	2	242.188	2
97.0703	1	242.676	0	97.0703	0	242.676	1
97.2656	1	243.164	0	97.2656	0	243.164	2
97.4609	2	243.652	0	97.4609	1	243.652	0
97.6562	1	244.141	1	97.6562	0	244.141	1
97.8516	0	244.629	1	97.8516	0	244.629	0
98.0469	1	245.117	2	98.0469	1	245.117	2
98.2422	1	245.605	0	98.2422	1	245.605	3
98.4375	2	246.094	1	98.4375	0	246.094	0
98.6328	3	246.582	2	98.6328	0	246.582	0
98.8281	1	247.07	1	98.8281	1	247.07	0
99.0234	0	247.559	2	99.0234	1	247.559	0
99.2188	2	248.047	2	99.2188	3	248.047	0
99.4141	1	248.535	0	99.4141	1	248.535	1
99.6094	1	249.023	2	99.6094	0	249.023	0
99.8047	0	249.512	0	99.8047	0	249.512	1
100	1	250	0			250	0
100.195	1	250.488	0			250.488	0
100.391	1	250.977	0			250.977	2
100.586	0	251.465	1			251.465	1
100.781	0	251.953	1			251.953	2
100.977	0	252.441	1			252.441	3
101.172	3	252.93	0			252.93	1
101.367	0	253.418	0			253.418	5
101.562	4	253.906	1			253.906	1
101.758	0	254.395	0			254.395	2
101.953	2	254.883	1			254.883	3
102.148	1	255.371	1			255.371	2
102.344	1	255.859	0			255.859	2
102.539	0	256.348	0			256.348	3
102.734	2	256.836	0			256.836	1
102.93	2	257.324	0			257.324	1
103.125	1	257.812	0			257.812	3
103.32	1	258.301	0			258.301	2
103.516	0	258.789	0			258.789	2
103.711	0	259.277	0			259.277	0
103.906	2	259.766	1			259.766	0
104.102	2	260.254	2			260.254	0
104.297	1	260.742	1			260.742	0
104.492	4	261.23	0			261.23	3
104.688	1	261.719	0			261.719	1
104.883	0	262.207	0			262.207	2
105.078	2	262.695	1			262.695	1
105.273	0	263.184	1			263.184	3
105.469	3	263.672	0			263.672	1
105.664	0	264.16	2			264.16	3
105.859	1	264.648	1			264.648	4
106.055	1	265.137	1			265.137	4
106.25	0	265.625	2			265.625	0
106.445	0	266.113	0			266.113	3
106.641	0	266.602	2			266.602	1
106.836	1	267.09	1			267.09	0
107.031	0	267.578	1			267.578	0
107.227	3	268.066	0			268.066	2
107.422	2	268.555	0			268.555	1
107.617	2	269.043	0			269.043	1
107.812	0	269.531	1			269.531	1
108.008	2	270.02	0			270.02	3
108.203	1	270.508	4			270.508	2
108.398	0	270.996	0			270.996	0
108.594	1	271.484	1			271.484	1
108.789	1	271.973	0			271.973	2
108.984	0	272.461	2			272.461	2
109.18	1	272.949	0			272.949	1
109.375	0	273.438	0			273.438	1
109.57	1	273.926	1			273.926	1
109.766	3	274.414	1			274.414	1
109.961	0	274.902	0			274.902	1
110.156	5	275.391	1			275.391	2
110.352	1	275.879	0			275.879	1
110.547	0	276.367	2			276.367	0
110.742	0	276.855	2			276.855	0
110.938	1	277.344	3			277.344	1
111.133	2	277.832	2			277.832	1
111.328	1	278.32	0			278.32	1
111.523	0	278.809	1			278.809	4
111.719	1	279.297	0			279.297	1
111.914	1	279.785	1			279.785	1
112.109	0	280.273	0			280.273	0
112.305	2	280.762	1			280.762	1
112.5	1	281.25	1			281.25	2
112.695	2	281.738	0			281.738	3
112.891	1	282.227	4			282.227	0
113.086	2	282.715	1			282.715	1
113.281	2	283.203	2			283.203	1
113.477	0	283.691	2			283.691	1
113.672	1	284.18	1			284.18	1
113.867	0	284.668	0			284.668	1
114.062	1	285.156	0			285.156	1
114.258	3	285.645	1			285.645	1
114.453	0	286.133	2			286.133	2
114.648	1	286.621	0			286.621	3
114.844	0	287.109	0			287.109	1
115.039	0	287.598	0			287.598	2
115.234	1	288.086	1			288.086	0
115.43	0	288.574	0			288.574	1
115.625	2	289.062	0			289.062	1
115.82	0	289.551	1			289.551	1
116.016	0	290.039	1			290.039	0
116.211	5	290.527	2			290.527	2
116.406	0	291.016	2			291.016	0
116.602	0	291.504	1			291.504	0
116.797	1	291.992	1			291.992	0
116.992	1	292.48	0			292.48	1
117.188	1	292.969	1			292.969	1
117.383	0	293.457	0			293.457	0
117.578	2	293.945	1			293.945	2
117.773	1	294.434	0			294.434	1
117.969	1	294.922	0			294.922	1
118.164	0	295.41	2			295.41	1
118.359	0	295.898	1			295.898	0
118.555	1	296.387	1			296.387	0
118.75	2	296.875	1			296.875	1
118.945	0	297.363	0			297.363	1
119.141	1	297.852	2			297.852	1
119.336	1	298.34	1			298.34	2
119.531	1	298.828	0			298.828	1
119.727	1	299.316	1			299.316	1
119.922	0	299.805	1			299.805	0
120.117	0	300.293	0			300.293	1
120.312	1	300.781	1			300.781	2
120.508	1	301.27	0			301.27	0
120.703	1	301.758	0			301.758	1
120.898	0	302.246	0			302.246	1
121.094	2	302.734	2			302.734	1
121.289	2	303.223	2			303.223	0
121.484	2	303.711	0			303.711	0
121.68	1	304.199	1			304.199	2
121.875	1	304.688	1			304.688	1
122.07	1	305.176	4			305.176	2
122.266	1	305.664	0			305.664	2
122.461	2	306.152	0			306.152	3
122.656	2	306.641	1			306.641	2
122.852	0	307.129	1			307.129	1
123.047	3	307.617	1			307.617	1
123.242	1	308.105	1			308.105	2
123.438	0	308.594	0			308.594	2
123.633	1	309.082	0			309.082	1
123.828	0	309.57	2			309.57	1
124.023	0	310.059	3			310.059	3
124.219	1	310.547	0			310.547	1
124.414	2	311.035	0			311.035	1
124.609	3	311.523	0			311.523	1
124.805	2	312.012	0			312.012	1
125	1	312.5	1			312.5	1
125.195	0	312.988	2			312.988	1
125.391	0	313.477	1			313.477	1
125.586	1	313.965	0			313.965	3
125.781	1	314.453	1			314.453	0
125.977	1	314.941	2			314.941	0
126.172	1	315.43	1			315.43	1
126.367	0	315.918	1			315.918	2
126.562	1	316.406	1			316.406	0
126.758	2	316.895	0			316.895	0
126.953	3	317.383	0			317.383	1
127.148	1	317.871	0			317.871	2
127.344	0	318.359	1			318.359	1
127.539	1	318.848	2			318.848	1
127.734	2	319.336	1			319.336	2
127.93	0	319.824	0			319.824	5
128.125	1	320.312	0			320.312	0
128.32	0	320.801	0			320.801	1
128.516	0	321.289	1			321.289	0
128.711	0	321.777	0			321.777	1
128.906	0	322.266	0			322.266	1
129.102	1	322.754	1			322.754	1
129.297	2	323.242	0			323.242	1
129.492	1	323.73	0			323.73	1
129.688	1	324.219	2			324.219	0
129.883	1	324.707	1			324.707	0
130.078	1	325.195	0			325.195	0
130.273	0	325.684	0			325.684	0
130.469	1	326.172	0			326.172	0
130.664	1	326.66	0			326.66	4
130.859	0	327.148	1			327.148	1
131.055	0	327.637	1			327.637	2
131.25	0	328.125	2			328.125	1
131.445	0	328.613	1			328.613	0
131.641	1	329.102	1			329.102	1
131.836	1	329.59	0			329.59	2
132.031	0	330.078	1			330.078	2
132.227	1	330.566	1			330.566	2
132.422	0	331.055	1			331.055	1
132.617	1	331.543	1			331.543	1
132.812	0	332.031	2			332.031	0
133.008	0	332.52	1			332.52	0
133.203	1	333.008	4			333.008	0
133.398	0	333.496	0			333.496	0
133.594	0	333.984	1			333.984	0
133.789	0	334.473	0			334.473	1
133.984	2	334.961	0			334.961	0
134.18	0	335.449	0			335.449	1
134.375	2	335.938	2			335.938	2
134.57	0	336.426	2			336.426	1
134.766	0	336.914	1			336.914	0
134.961	1	337.402	0			337.402	1
135.156	2	337.891	0			337.891	0
135.352	1	338.379	0			338.379	0
135.547	1	338.867	0			338.867	2
135.742	1	339.355	2			339.355	0
135.938	1	339.844	1			339.844	1
136.133	0	340.332	0			340.332	3
136.328	0	340.82	2			340.82	1
136.523	0	341.309	1			341.309	0
136.719	2	341.797	1			341.797	1
136.914	1	342.285	0			342.285	0
137.109	2	342.773	0			342.773	2
137.305	1	343.262	2			343.262	2
137.5	1	343.75	0			343.75	0
137.695	0	344.238	0			344.238	1
137.891	1	344.727	1			344.727	1
138.086	0	345.215	3			345.215	1
138.281	0	345.703	1			345.703	1
138.477	2	346.191	0			346.191	2
138.672	0	346.68	0			346.68	0
138.867	0	347.168	2			347.168	0
139.062	0	347.656	1			347.656	0
139.258	1	348.145	1			348.145	0
139.453	2	348.633	1			348.633	0
139.648	2	349.121	0			349.121	2
139.844	0	349.609	2			349.609	1
140.039	4	350.098	1			350.098	2
140.234	1	350.586	2			350.586	2
140.43	1	351.074	1			351.074	1
140.625	3	351.562	2			351.562	1
140.82	0	352.051	1			352.051	3
141.016	1	352.539	1			352.539	1
141.211	0	353.027	1			353.027	1
141.406	2	353.516	0			353.516	1
141.602	0	354.004	0			354.004	1
141.797	2	354.492	1			354.492	0
141.992	1	354.98	2			354.98	3
142.188	0	355.469	1			355.469	1
142.383	0	355.957	0			355.957	2
142.578	1	356.445	3			356.445	1
142.773	0	356.934	2			356.934	1
142.969	1	357.422	1			357.422	0
143.164	2	357.91	1			357.91	0
143.359	0	358.398	0			358.398	1
143.555	0	358.887	1			358.887	0
143.75	1	359.375	0			359.375	2
143.945	0	359.863	1			359.863	0
144.141	0	360.352	2			360.352	0
144.336	0	360.84	2			360.84	2
144.531	2	361.328	0			361.328	2
144.727	2	361.816	0			361.816	2
144.922	0	362.305	2			362.305	2
145.117	1	362.793	1			362.793	2
145.312	0	363.281	0			363.281	1
145.508	0	363.77	1			363.77	1
145.703	1	364.258	0			364.258	3
145.898	1	364.746	3			364.746	3
146.094	2	365.234	1			365.234	0
146.289	0	365.723	1			365.723	0
146.484	1	366.211	0			366.211	0
146.68	0	366.699	1			366.699	2
146.875	0	367.188	1			367.188	0
147.07	4	367.676	1			367.676	0
147.266	0	368.164	0			368.164	0
147.461	2	368.652	0			368.652	1
147.656	2	369.141	0			369.141	1
147.852	0	369.629	1			369.629	0
148.047	3	370.117	0			370.117	0
148.242	1	370.605	2			370.605	0
148.438	0	371.094	1			371.094	1
148.633	1	371.582	1			371.582	2
148.828	0	372.07	1			372.07	3
149.023	1	372.559	2			372.559	1
149.219	1	373.047	1			373.047	1
149.414	0	373.535	2			373.535	0
149.609	1	374.023	1			374.023	1
149.805	0	374.512	0			374.512	1
150	2	375	3			375	1
150.195	0	375.488	2			375.488	2
150.391	3	375.977	2			375.977	1
150.586	2	376.465	1			376.465	2
150.781	1	376.953	0			376.953	2
150.977	1	377.441	2			377.441	2
151.172	0	377.93	1			377.93	0
151.367	0	378.418	0			378.418	2
151.562	1	378.906	0			378.906	1
151.758	1	379.395	3			379.395	2
151.953	1	379.883	0			379.883	0
152.148	0	380.371	1			380.371	1
152.344	1	380.859	1			380.859	1
152.539	1	381.348	1			381.348	1
152.734	0	381.836	0			381.836	0
152.93	2	382.324	2			382.324	1
153.125	1	382.812	0			382.812	2
153.32	0	383.301	0			383.301	1
153.516	3	383.789	0			383.789	0
153.711	1	384.277	2			384.277	0
153.906	2	384.766	0			384.766	1
154.102	0	385.254	1			385.254	2
154.297	2	385.742	2			385.742	1
154.492	1	386.23	0			386.23	0
154.688	0	386.719	0			386.719	0
154.883	2	387.207	0			387.207	0
155.078	2	387.695	0			387.695	1
155.273	1	388.184	1			388.184	2
155.469	1	388.672	0			388.672	1
155.664	1	389.16	1			389.16	2
155.859	0	389.648	1			389.648	2
156.055	0	390.137	0			390.137	1
156.25	1	390.625	1			390.625	1
156.445	2	391.113	4			391.113	1
156.641	1	391.602	1			391.602	4
156.836	2	392.09	0			392.09	1
157.031	1	392.578	0			392.578	4
157.227	2	393.066	0			393.066	0
157.422	2	393.555	2			393.555	1
157.617	3	394.043	4			394.043	1
157.812	1	394.531	0			394.531	1
158.008	0	395.02	1			395.02	0
158.203	1	395.508	0			395.508	1
158.398	2	395.996	0			395.996	2
158.594	2	396.484	0			396.484	1
158.789	1	396.973	0			396.973	2
158.984	0	397.461	1			397.461	2
159.18	1	397.949	0			397.949	1
159.375	1	398.438	0			398.438	1
159.57	0	398.926	0			398.926	2
159.766	2	399.414	1			399.414	1
159.961	1	399.902	1			399.902	2
160.156	0	400.391	2			400.391	2
160.352	3	400.879	1			400.879	1
160.547	2	401.367	1			401.367	0
160.742	4	401.855	2			401.855	0
160.938	1	402.344	0			402.344	2
161.133	2	402.832	0			402.832	1
161.328	1	403.32	1			403.32	0
161.523	0	403.809	0			403.809	0
161.719	1	404.297	1			404.297	1
161.914	2	404.785	1			404.785	2
162.109	1	405.273	2			405.273	2
162.305	1	405.762	2			405.762	1
162.5	0	406.25	0			406.25	0
162.695	0	406.738	0			406.738	1
162.891	0	407.227	1			407.227	3
163.086	0	407.715	0			407.715	0
163.281	0	408.203	0			408.203	0
163.477	1	408.691	1			408.691	0
163.672	1	409.18	2			409.18	3
163.867	1	409.668	1			409.668	2
164.062	2	410.156	1			410.156	0
164.258	0	410.645	1			410.645	2
164.453	1	411.133	2			411.133	0
164.648	0	411.621	0			411.621	1
164.844	1	412.109	0			412.109	2
165.039	0	412.598	3			412.598	2
165.234	0	413.086	1			413.086	1
165.43	1	413.574	2			413.574	2
165.625	3	414.062	1			414.062	3
165.82	1	414.551	1			414.551	1
166.016	2	415.039	1			415.039	0
166.211	1	415.527	1			415.527	1
166.406	1	416.016	1			416.016	0
166.602	1	416.504	0			416.504	1
166.797	0	416.992	2			416.992	1
166.992	3	417.48	0			417.48	0
167.188	1	417.969	1			417.969	1
167.383	1	418.457	0			418.457	0
167.578	0	418.945	1			418.945	0
167.773	0	419.434	0			419.434	1
167.969	0	419.922	2			419.922	0
168.164	0	420.41	1			420.41	3
168.359	0	420.898	1			420.898	1
168.555	2	421.387	3			421.387	1
168.75	3	421.875	1			421.875	3
168.945	2	422.363	0			422.363	0
169.141	1	422.852	1			422.852	0
169.336	0	423.34	0			423.34	0
169.531	0	423.828	0			423.828	2
169.727	0	424.316	2			424.316	3
169.922	1	424.805	0			424.805	1
170.117	1	425.293	3			425.293	0
170.312	0	425.781	1			425.781	2
170.508	0	426.27	3			426.27	0
170.703	0	426.758	2			426.758	0
170.898	0	427.246	2			427.246	1
171.094	2	427.734	1			427.734	3
171.289	2	428.223	3			428.223	0
171.484	1	428.711	2			428.711	3
171.68	1	429.199	1			429.199	0
171.875	1	429.688	0			429.688	1
172.07	3	430.176	2			430.176	1
172.266	1	430.664	0			430.664	0
172.461	2	431.152	0			431.152	0
172.656	1	431.641	1			431.641	1
172.852	0	432.129	3			432.129	0
173.047	0	432.617	1			432.617	2
173.242	1	433.105	0			433.105	1
173.438	2	433.594	2			433.594	2
173.633	0	434.082	0			434.082	0
173.828	1	434.57	1			434.57	2
174.023	0	435.059	2			435.059	4
174.219	0	435.547	1			435.547	2
174.414	1	436.035	0			436.035	3
174.609	1	436.523	2			436.523	1
174.805	0	437.012	0			437.012	2
175	2	437.5	2			437.5	1
175.195	0	437.988	1			437.988	4
175.391	3	438.477	2			438.477	1
175.586	2	438.965	1			438.965	3
175.781	4	439.453	1			439.453	0
175.977	3	439.941	0			439.941	0
176.172	1	440.43	2			440.43	0
176.367	1	440.918	2			440.918	0
176.562	1	441.406	0			441.406	0
176.758	0	441.895	1			441.895	2
176.953	2	442.383	0			442.383	3
177.148	0	442.871	2			442.871	2
177.344	1	443.359	0			443.359	1
177.539	0	443.848	1			443.848	1
177.734	1	444.336	1			444.336	0
177.93	0	444.824	1			444.824	4
178.125	1	445.312	0			445.312	4
178.32	1	445.801	1			445.801	0
178.516	1	446.289	2			446.289	0
178.711	1	446.777	0			446.777	1
178.906	2	447.266	0			447.266	0
179.102	2	447.754	0			447.754	0
179.297	0	448.242	2			448.242	2
179.492	0	448.73	0			448.73	1
179.688	1	449.219	0			449.219	3
179.883	1	449.707	2			449.707	0
180.078	3	450.195	0			450.195	1
180.273	0	450.684	1			450.684	0
180.469	0	451.172	1			451.172	0
180.664	2	451.66	1			451.66	0
180.859	1	452.148	1			452.148	2
181.055	3	452.637	1			452.637	1
181.25	1	453.125	0			453.125	5
181.445	2	453.613	0			453.613	0
181.641	2	454.102	1			454.102	3
181.836	0	454.59	0			454.59	1
182.031	0	455.078	0			455.078	1
182.227	0	455.566	0			455.566	1
182.422	2	456.055	2			456.055	3
182.617	0	456.543	1			456.543	4
182.812	2	457.031	2			457.031	2
183.008	3	457.52	2			457.52	2
183.203	1	458.008	4			458.008	1
183.398	1	458.496	0			458.496	1
183.594	1	458.984	3			458.984	0
183.789	2	459.473	0			459.473	2
183.984	0	459.961	2			459.961	1
184.18	2	460.449	2			460.449	1
184.375	0	460.938	3			460.938	0
184.57	0	461.426	1			461.426	2
184.766	2	461.914	1			461.914	2
184.961	1	462.402	0			462.402	0
185.156	1	462.891	1			462.891	3
185.352	2	463.379	0			463.379	1
185.547	0	463.867	0			463.867	0
185.742	1	464.355	1			464.355	1
185.938	1	464.844	3			464.844	3
186.133	0	465.332	2			465.332	1
186.328	1	465.82	0			465.82	1
186.523	0	466.309	1			466.309	1
186.719	3	466.797	1			466.797	0
186.914	1	467.285	2			467.285	1
187.109	1	467.773	1			467.773	1
187.305	1	468.262	0			468.262	1
187.5	0	468.75	0			468.75	3
187.695	0	469.238	1			469.238	1
187.891	2	469.727	2			469.727	2
188.086	1	470.215	0			470.215	1
188.281	0	470.703	0			470.703	0
188.477	0	471.191	1			471.191	0
188.672	1	471.68	3			471.68	1
188.867	2	472.168	2			472.168	0
189.062	1	472.656	1			472.656	0
189.258	0	473.145	1			473.145	0
189.453	0	473.633	0			473.633	0
189.648	3	474.121	1			474.121	2
189.844	1	474.609	1			474.609	0
190.039	0	475.098	0			475.098	2
190.234	2	475.586	0			475.586	2
190.43	2	476.074	0			476.074	1
190.625	0	476.562	1			476.562	2
190.82	0	477.051	0			477.051	1
191.016	1	477.539	0			477.539	2
191.211	1	478.027	1			478.027	1
191.406	1	478.516	1			478.516	3
191.602	1	479.004	1			479.004	0
191.797	1	479.492	2			479.492	1
191.992	2	479.98	1			479.98	2
192.188	0	480.469	1			480.469	0
192.383	1	480.957	0			480.957	2
192.578	4	481.445	1			481.445	0
192.773	1	481.934	2			481.934	1
192.969	0	482.422	0			482.422	1
193.164	1	482.91	1			482.91	1
193.359	2	483.398	2			483.398	0
193.555	1	483.887	0			483.887	2
193.75	0	484.375	1			484.375	1
193.945	2	484.863	0			484.863	4
194.141	0	485.352	1			485.352	1
194.336	1	485.84	0			485.84	1
194.531	0	486.328	2			486.328	3
194.727	0	486.816	0			486.816	0
194.922	4	487.305	2			487.305	0
195.117	0	487.793	2			487.793	3
195.312	0	488.281	0			488.281	0
195.508	1	488.77	0			488.77	1
195.703	1	489.258	0			489.258	2
195.898	1	489.746	1			489.746	2
196.094	1	490.234	2			490.234	0
196.289	4	490.723	0			490.723	3
196.484	0	491.211	0			491.211	2
196.68	2	491.699	0			491.699	1
196.875	2	492.188	0			492.188	2
197.07	0	492.676	0			492.676	0
197.266	0	493.164	0			493.164	1
197.461	1	493.652	2			493.652	1
197.656	0	494.141	3			494.141	0
197.852	0	494.629	0			494.629	0
198.047	2	495.117	2			495.117	0
198.242	0	495.605	2			495.605	0
198.438	2	496.094	0			496.094	2
198.633	0	496.582	1			496.582	2
198.828	0	497.07	1			497.07	3
199.023	1	497.559	1			497.559	1
199.219	0	498.047	1			498.047	3
199.414	1	498.535	2			498.535	1
199.609	1	499.023	4			499.023	1
199.805	1	499.512	0			499.512	0

## Sheet: Figure 5b
0 second			30 second			60 second			3 mins			5mins
X	Y	Z	X	Y	Z	X	Y	Z	X	Y	Z	X	Y	Z
200.134	1	0.019	200.134	2	0.026	200.134	3	0.083	200.134	4	-0.02	200.134	5	-0.001
200.557	1	0.01	200.557	2	-0.001	200.557	3	0.068	200.557	4	-0.017	200.557	5	-0.003
200.98	1	0.006	200.98	2	-0.012	200.98	3	0.05	200.98	4	-0.015	200.98	5	-0.01
201.403	1	-0.001	201.403	2	-0.013	201.403	3	0.044	201.403	4	-0.015	201.403	5	-0.013
201.826	1	-0.005	201.826	2	-0.024	201.826	3	0.022	201.826	4	-0.016	201.826	5	-0.022
202.249	1	-0.007	202.249	2	-0.019	202.249	3	0.006	202.249	4	-0.021	202.249	5	-0.018
202.673	1	-0.01	202.673	2	-0.007	202.673	3	0.006	202.673	4	-0.011	202.673	5	-0.004
203.096	1	-0.018	203.096	2	-0.01	203.096	3	-0.004	203.096	4	0.003	203.096	5	-0.001
203.519	1	-0.019	203.519	2	-0.008	203.519	3	-0.013	203.519	4	0.003	203.519	5	-0.006
203.943	1	-0.007	203.943	2	0	203.943	3	-0.014	203.943	4	0.003	203.943	5	-0.01
204.366	1	-0.001	204.366	2	-0.009	204.366	3	-0.012	204.366	4	0.006	204.366	5	-0.014
204.79	1	0.004	204.79	2	-0.011	204.79	3	-0.004	204.79	4	0.006	204.79	5	-0.014
205.213	1	0.02	205.213	2	0.013	205.213	3	0.006	205.213	4	0.009	205.213	5	0.003
205.637	1	0.025	205.637	2	0.024	205.637	3	0.013	205.637	4	0.009	205.637	5	0.018
206.061	1	0.019	206.061	2	0.03	206.061	3	0.007	206.061	4	0.003	206.061	5	0.02
206.484	1	0.02	206.484	2	0.066	206.484	3	0.021	206.484	4	0.019	206.484	5	0.038
206.908	1	0.029	206.908	2	0.099	206.908	3	0.048	206.908	4	0.047	206.908	5	0.046
207.332	1	0.032	207.332	2	0.114	207.332	3	0.035	207.332	4	0.042	207.332	5	0.05
207.756	1	0.039	207.756	2	0.125	207.756	3	0.03	207.756	4	0.015	207.756	5	0.037
208.18	1	0.034	208.18	2	0.13	208.18	3	0.011	208.18	4	0.01	208.18	5	0.033
208.604	1	0.021	208.604	2	0.112	208.604	3	0.004	208.604	4	0.011	208.604	5	0.038
209.028	1	0.014	209.028	2	0.116	209.028	3	0.006	209.028	4	0.022	209.028	5	0.048
209.452	1	0.008	209.452	2	0.121	209.452	3	0.002	209.452	4	0.016	209.452	5	0.044
209.876	1	-0.003	209.876	2	0.121	209.876	3	-0.006	209.876	4	0.012	209.876	5	0.033
210.3	1	-0.003	210.3	2	0.12	210.3	3	-0.009	210.3	4	0.02	210.3	5	0.031
210.724	1	-0.001	210.724	2	0.107	210.724	3	-0.009	210.724	4	0.019	210.724	5	0.029
211.148	1	-0.014	211.148	2	0.073	211.148	3	-0.019	211.148	4	0.007	211.148	5	0.022
211.572	1	-0.025	211.572	2	0.036	211.572	3	-0.021	211.572	4	-0.003	211.572	5	0.022
211.997	1	-0.021	211.997	2	0.025	211.997	3	-0.01	211.997	4	0.001	211.997	5	0.036
212.421	1	-0.01	212.421	2	0.029	212.421	3	0.001	212.421	4	0.014	212.421	5	0.055
212.845	1	0	212.845	2	0.028	212.845	3	0.013	212.845	4	0.021	212.845	5	0.063
213.27	1	0.007	213.27	2	0.028	213.27	3	0.01	213.27	4	0.024	213.27	5	0.055
213.694	1	0.013	213.694	2	0.021	213.694	3	0.012	213.694	4	0.032	213.694	5	0.05
214.119	1	0.018	214.119	2	0.015	214.119	3	0.01	214.119	4	0.027	214.119	5	0.044
214.543	1	0.028	214.543	2	0.006	214.543	3	0.034	214.543	4	0.029	214.543	5	0.043
214.968	1	0.016	214.968	2	0.006	214.968	3	0.029	214.968	4	0.015	214.968	5	0.035
215.392	1	0.021	215.392	2	0.012	215.392	3	0.037	215.392	4	0.023	215.392	5	0.035
215.817	1	0.031	215.817	2	0.024	215.817	3	0.031	215.817	4	0.035	215.817	5	0.029
216.242	1	0.045	216.242	2	0.029	216.242	3	0.02	216.242	4	0.04	216.242	5	0.016
216.667	1	0.05	216.667	2	0.038	216.667	3	0.028	216.667	4	0.067	216.667	5	0.015
217.091	1	0.044	217.091	2	0.028	217.091	3	0.033	217.091	4	0.079	217.091	5	0.009
217.516	1	0.031	217.516	2	0.013	217.516	3	0.025	217.516	4	0.076	217.516	5	0.002
217.941	1	0.023	217.941	2	0.01	217.941	3	0.027	217.941	4	0.067	217.941	5	-0.002
218.366	1	0.013	218.366	2	0.007	218.366	3	0.032	218.366	4	0.058	218.366	5	0.001
218.791	1	0.001	218.791	2	0.007	218.791	3	0.02	218.791	4	0.057	218.791	5	0.013
219.216	1	-0.001	219.216	2	0.008	219.216	3	0.009	219.216	4	0.049	219.216	5	0.017
219.641	1	0.002	219.641	2	0.006	219.641	3	0.015	219.641	4	0.044	219.641	5	0.01
220.066	1	0.008	220.066	2	0.001	220.066	3	0.023	220.066	4	0.053	220.066	5	-0.001
220.492	1	0.015	220.492	2	-0.004	220.492	3	0.033	220.492	4	0.055	220.492	5	-0.008
220.917	1	0.007	220.917	2	-0.004	220.917	3	0.046	220.917	4	0.055	220.917	5	-0.004
221.342	1	0.005	221.342	2	-0.008	221.342	3	0.037	221.342	4	0.047	221.342	5	-0.007
221.767	1	0.012	221.767	2	-0.005	221.767	3	0.049	221.767	4	0.062	221.767	5	0.005
222.193	1	0.022	222.193	2	0.016	222.193	3	0.077	222.193	4	0.078	222.193	5	0.024
222.618	1	0.031	222.618	2	0.021	222.618	3	0.086	222.618	4	0.093	222.618	5	0.039
223.044	1	0.051	223.044	2	0.039	223.044	3	0.091	223.044	4	0.091	223.044	5	0.05
223.469	1	0.067	223.469	2	0.048	223.469	3	0.106	223.469	4	0.099	223.469	5	0.047
223.895	1	0.061	223.895	2	0.037	223.895	3	0.104	223.895	4	0.102	223.895	5	0.041
224.32	1	0.06	224.32	2	0.035	224.32	3	0.087	224.32	4	0.108	224.32	5	0.053
224.746	1	0.058	224.746	2	0.04	224.746	3	0.068	224.746	4	0.092	224.746	5	0.064
225.171	1	0.059	225.171	2	0.054	225.171	3	0.069	225.171	4	0.088	225.171	5	0.091
225.597	1	0.066	225.597	2	0.066	225.597	3	0.079	225.597	4	0.087	225.597	5	0.105
226.023	1	0.071	226.023	2	0.07	226.023	3	0.077	226.023	4	0.076	226.023	5	0.098
226.449	1	0.081	226.449	2	0.071	226.449	3	0.066	226.449	4	0.067	226.449	5	0.091
226.874	1	0.093	226.874	2	0.07	226.874	3	0.056	226.874	4	0.052	226.874	5	0.079
227.3	1	0.092	227.3	2	0.068	227.3	3	0.051	227.3	4	0.049	227.3	5	0.064
227.726	1	0.085	227.726	2	0.06	227.726	3	0.04	227.726	4	0.053	227.726	5	0.051
228.152	1	0.078	228.152	2	0.053	228.152	3	0.028	228.152	4	0.045	228.152	5	0.046
228.578	1	0.083	228.578	2	0.067	228.578	3	0.03	228.578	4	0.049	228.578	5	0.052
229.004	1	0.089	229.004	2	0.074	229.004	3	0.038	229.004	4	0.058	229.004	5	0.055
229.43	1	0.087	229.43	2	0.075	229.43	3	0.051	229.43	4	0.063	229.43	5	0.061
229.856	1	0.09	229.856	2	0.074	229.856	3	0.046	229.856	4	0.058	229.856	5	0.043
230.283	1	0.089	230.283	2	0.07	230.283	3	0.037	230.283	4	0.045	230.283	5	0.023
230.709	1	0.084	230.709	2	0.07	230.709	3	0.033	230.709	4	0.038	230.709	5	0.027
231.135	1	0.076	231.135	2	0.065	231.135	3	0.024	231.135	4	0.031	231.135	5	0.029
231.561	1	0.072	231.561	2	0.057	231.561	3	0.015	231.561	4	0.037	231.561	5	0.03
231.988	1	0.077	231.988	2	0.064	231.988	3	0.021	231.988	4	0.041	231.988	5	0.039
232.414	1	0.084	232.414	2	0.069	232.414	3	0.03	232.414	4	0.038	232.414	5	0.043
232.841	1	0.097	232.841	2	0.081	232.841	3	0.032	232.841	4	0.049	232.841	5	0.047
233.267	1	0.1	233.267	2	0.086	233.267	3	0.036	233.267	4	0.055	233.267	5	0.049
233.694	1	0.099	233.694	2	0.077	233.694	3	0.039	233.694	4	0.053	233.694	5	0.043
234.12	1	0.099	234.12	2	0.07	234.12	3	0.039	234.12	4	0.056	234.12	5	0.039
234.547	1	0.09	234.547	2	0.065	234.547	3	0.037	234.547	4	0.055	234.547	5	0.05
234.974	1	0.084	234.974	2	0.064	234.974	3	0.035	234.974	4	0.055	234.974	5	0.064
235.4	1	0.085	235.4	2	0.066	235.4	3	0.044	235.4	4	0.057	235.4	5	0.067
235.827	1	0.081	235.827	2	0.068	235.827	3	0.06	235.827	4	0.06	235.827	5	0.064
236.254	1	0.08	236.254	2	0.07	236.254	3	0.07	236.254	4	0.067	236.254	5	0.064
236.681	1	0.083	236.681	2	0.067	236.681	3	0.074	236.681	4	0.068	236.681	5	0.072
237.108	1	0.076	237.108	2	0.058	237.108	3	0.072	237.108	4	0.068	237.108	5	0.071
237.535	1	0.068	237.535	2	0.049	237.535	3	0.074	237.535	4	0.065	237.535	5	0.064
237.962	1	0.068	237.962	2	0.047	237.962	3	0.074	237.962	4	0.071	237.962	5	0.063
238.389	1	0.068	238.389	2	0.063	238.389	3	0.074	238.389	4	0.092	238.389	5	0.071
238.816	1	0.072	238.816	2	0.073	238.816	3	0.07	238.816	4	0.091	238.816	5	0.073
239.243	1	0.07	239.243	2	0.074	239.243	3	0.067	239.243	4	0.093	239.243	5	0.066
239.67	1	0.068	239.67	2	0.067	239.67	3	0.065	239.67	4	0.091	239.67	5	0.058
240.097	1	0.061	240.097	2	0.06	240.097	3	0.058	240.097	4	0.083	240.097	5	0.05
240.524	1	0.061	240.524	2	0.056	240.524	3	0.045	240.524	4	0.069	240.524	5	0.041
240.952	1	0.057	240.952	2	0.051	240.952	3	0.038	240.952	4	0.049	240.952	5	0.038
241.379	1	0.05	241.379	2	0.044	241.379	3	0.029	241.379	4	0.036	241.379	5	0.027
241.806	1	0.049	241.806	2	0.041	241.806	3	0.027	241.806	4	0.03	241.806	5	0.022
242.234	1	0.05	242.234	2	0.042	242.234	3	0.027	242.234	4	0.025	242.234	5	0.027
242.661	1	0.053	242.661	2	0.044	242.661	3	0.019	242.661	4	0.015	242.661	5	0.025
243.089	1	0.058	243.089	2	0.04	243.089	3	0.016	243.089	4	0.007	243.089	5	0.023
243.516	1	0.058	243.516	2	0.033	243.516	3	0.02	243.516	4	0.008	243.516	5	0.025
243.944	1	0.057	243.944	2	0.032	243.944	3	0.024	243.944	4	0.012	243.944	5	0.029
244.372	1	0.064	244.372	2	0.037	244.372	3	0.025	244.372	4	0.016	244.372	5	0.03
244.799	1	0.07	244.799	2	0.04	244.799	3	0.023	244.799	4	0.022	244.799	5	0.03
245.227	1	0.071	245.227	2	0.042	245.227	3	0.025	245.227	4	0.029	245.227	5	0.036
245.655	1	0.074	245.655	2	0.047	245.655	3	0.033	245.655	4	0.043	245.655	5	0.042
246.082	1	0.073	246.082	2	0.054	246.082	3	0.045	246.082	4	0.055	246.082	5	0.05
246.51	1	0.07	246.51	2	0.06	246.51	3	0.046	246.51	4	0.055	246.51	5	0.049
246.938	1	0.065	246.938	2	0.062	246.938	3	0.048	246.938	4	0.055	246.938	5	0.052
247.366	1	0.054	247.366	2	0.06	247.366	3	0.055	247.366	4	0.058	247.366	5	0.053
247.794	1	0.044	247.794	2	0.057	247.794	3	0.059	247.794	4	0.056	247.794	5	0.054
248.222	1	0.04	248.222	2	0.051	248.222	3	0.052	248.222	4	0.048	248.222	5	0.041
248.65	1	0.043	248.65	2	0.049	248.65	3	0.051	248.65	4	0.048	248.65	5	0.042
249.078	1	0.045	249.078	2	0.05	249.078	3	0.057	249.078	4	0.051	249.078	5	0.045
249.507	1	0.046	249.507	2	0.053	249.507	3	0.063	249.507	4	0.054	249.507	5	0.047
249.935	1	0.047	249.935	2	0.054	249.935	3	0.063	249.935	4	0.054	249.935	5	0.046
250.363	1	0.046	250.363	2	0.054	250.363	3	0.059	250.363	4	0.053	250.363	5	0.043
250.791	1	0.047	250.791	2	0.051	250.791	3	0.057	250.791	4	0.05	250.791	5	0.044
251.22	1	0.047	251.22	2	0.048	251.22	3	0.051	251.22	4	0.047	251.22	5	0.051
251.648	1	0.05	251.648	2	0.042	251.648	3	0.047	251.648	4	0.044	251.648	5	0.056
252.076	1	0.056	252.076	2	0.036	252.076	3	0.043	252.076	4	0.043	252.076	5	0.052
252.505	1	0.057	252.505	2	0.038	252.505	3	0.043	252.505	4	0.042	252.505	5	0.052
252.933	1	0.058	252.933	2	0.044	252.933	3	0.052	252.933	4	0.042	252.933	5	0.06
253.362	1	0.063	253.362	2	0.046	253.362	3	0.06	253.362	4	0.04	253.362	5	0.063
253.791	1	0.058	253.791	2	0.039	253.791	3	0.057	253.791	4	0.033	253.791	5	0.057
254.219	1	0.054	254.219	2	0.032	254.219	3	0.052	254.219	4	0.034	254.219	5	0.052
254.648	1	0.057	254.648	2	0.03	254.648	3	0.052	254.648	4	0.039	254.648	5	0.05
255.077	1	0.052	255.077	2	0.025	255.077	3	0.049	255.077	4	0.033	255.077	5	0.047
255.505	1	0.05	255.505	2	0.023	255.505	3	0.045	255.505	4	0.037	255.505	5	0.047
255.934	1	0.05	255.934	2	0.024	255.934	3	0.046	255.934	4	0.041	255.934	5	0.047
256.363	1	0.041	256.363	2	0.02	256.363	3	0.04	256.363	4	0.045	256.363	5	0.043
256.792	1	0.037	256.792	2	0.018	256.792	3	0.043	256.792	4	0.041	256.792	5	0.044
257.221	1	0.039	257.221	2	0.012	257.221	3	0.042	257.221	4	0.037	257.221	5	0.048
257.65	1	0.037	257.65	2	0.01	257.65	3	0.035	257.65	4	0.037	257.65	5	0.05
258.079	1	0.029	258.079	2	0.012	258.079	3	0.029	258.079	4	0.037	258.079	5	0.051
258.508	1	0.032	258.508	2	0.014	258.508	3	0.027	258.508	4	0.039	258.508	5	0.056
258.937	1	0.035	258.937	2	0.017	258.937	3	0.029	258.937	4	0.037	258.937	5	0.063
259.366	1	0.032	259.366	2	0.018	259.366	3	0.03	259.366	4	0.033	259.366	5	0.064
259.796	1	0.033	259.796	2	0.02	259.796	3	0.027	259.796	4	0.031	259.796	5	0.066
260.225	1	0.035	260.225	2	0.025	260.225	3	0.027	260.225	4	0.027	260.225	5	0.067
260.654	1	0.044	260.654	2	0.029	260.654	3	0.032	260.654	4	0.024	260.654	5	0.063
261.083	1	0.055	261.083	2	0.034	261.083	3	0.036	261.083	4	0.021	261.083	5	0.059
261.513	1	0.055	261.513	2	0.037	261.513	3	0.035	261.513	4	0.024	261.513	5	0.057
261.942	1	0.057	261.942	2	0.04	261.942	3	0.034	261.942	4	0.028	261.942	5	0.053
262.372	1	0.064	262.372	2	0.042	262.372	3	0.035	262.372	4	0.024	262.372	5	0.051
262.801	1	0.066	262.801	2	0.042	262.801	3	0.038	262.801	4	0.022	262.801	5	0.047
263.231	1	0.063	263.231	2	0.043	263.231	3	0.042	263.231	4	0.02	263.231	5	0.045
263.66	1	0.06	263.66	2	0.04	263.66	3	0.035	263.66	4	0.016	263.66	5	0.042
264.09	1	0.063	264.09	2	0.042	264.09	3	0.034	264.09	4	0.013	264.09	5	0.043
264.52	1	0.065	264.52	2	0.04	264.52	3	0.04	264.52	4	0.017	264.52	5	0.044
264.949	1	0.066	264.949	2	0.037	264.949	3	0.04	264.949	4	0.017	264.949	5	0.037
265.379	1	0.058	265.379	2	0.038	265.379	3	0.036	265.379	4	0.014	265.379	5	0.041
265.809	1	0.05	265.809	2	0.037	265.809	3	0.033	265.809	4	0.013	265.809	5	0.037
266.239	1	0.053	266.239	2	0.037	266.239	3	0.037	266.239	4	0.01	266.239	5	0.036
266.669	1	0.048	266.669	2	0.035	266.669	3	0.036	266.669	4	0.005	266.669	5	0.034
267.099	1	0.051	267.099	2	0.031	267.099	3	0.04	267.099	4	0.009	267.099	5	0.032
267.529	1	0.049	267.529	2	0.03	267.529	3	0.035	267.529	4	0.009	267.529	5	0.027
267.959	1	0.048	267.959	2	0.03	267.959	3	0.03	267.959	4	0.012	267.959	5	0.026
268.389	1	0.047	268.389	2	0.032	268.389	3	0.032	268.389	4	0.017	268.389	5	0.027
268.819	1	0.043	268.819	2	0.033	268.819	3	0.029	268.819	4	0.021	268.819	5	0.024
269.249	1	0.041	269.249	2	0.032	269.249	3	0.023	269.249	4	0.018	269.249	5	0.021
269.679	1	0.04	269.679	2	0.03	269.679	3	0.022	269.679	4	0.015	269.679	5	0.019
270.11	1	0.039	270.11	2	0.026	270.11	3	0.028	270.11	4	0.019	270.11	5	0.02
270.54	1	0.04	270.54	2	0.026	270.54	3	0.032	270.54	4	0.026	270.54	5	0.027
270.97	1	0.041	270.97	2	0.029	270.97	3	0.032	270.97	4	0.029	270.97	5	0.03
271.401	1	0.036	271.401	2	0.031	271.401	3	0.029	271.401	4	0.028	271.401	5	0.029
271.831	1	0.026	271.831	2	0.032	271.831	3	0.023	271.831	4	0.025	271.831	5	0.03
272.261	1	0.023	272.261	2	0.032	272.261	3	0.023	272.261	4	0.024	272.261	5	0.032
272.692	1	0.026	272.692	2	0.03	272.692	3	0.026	272.692	4	0.022	272.692	5	0.034
273.122	1	0.028	273.122	2	0.031	273.122	3	0.029	273.122	4	0.02	273.122	5	0.033
273.553	1	0.029	273.553	2	0.03	273.553	3	0.03	273.553	4	0.017	273.553	5	0.031
273.984	1	0.028	273.984	2	0.031	273.984	3	0.034	273.984	4	0.019	273.984	5	0.034
274.414	1	0.028	274.414	2	0.026	274.414	3	0.029	274.414	4	0.019	274.414	5	0.035
274.845	1	0.028	274.845	2	0.026	274.845	3	0.023	274.845	4	0.017	274.845	5	0.032
275.276	1	0.032	275.276	2	0.024	275.276	3	0.021	275.276	4	0.01	275.276	5	0.023
275.707	1	0.034	275.707	2	0.024	275.707	3	0.019	275.707	4	0.006	275.707	5	0.023
276.138	1	0.041	276.138	2	0.025	276.138	3	0.023	276.138	4	0.009	276.138	5	0.025
276.568	1	0.048	276.568	2	0.024	276.568	3	0.028	276.568	4	0.012	276.568	5	0.026
276.999	1	0.047	276.999	2	0.024	276.999	3	0.028	276.999	4	0.012	276.999	5	0.025
277.43	1	0.043	277.43	2	0.026	277.43	3	0.027	277.43	4	0.012	277.43	5	0.025
277.861	1	0.039	277.861	2	0.025	277.861	3	0.025	277.861	4	0.012	277.861	5	0.026
278.292	1	0.039	278.292	2	0.023	278.292	3	0.024	278.292	4	0.011	278.292	5	0.025
278.724	1	0.04	278.724	2	0.026	278.724	3	0.025	278.724	4	0.012	278.724	5	0.027
279.155	1	0.038	279.155	2	0.026	279.155	3	0.029	279.155	4	0.015	279.155	5	0.03
279.586	1	0.036	279.586	2	0.024	279.586	3	0.034	279.586	4	0.018	279.586	5	0.032
280.017	1	0.034	280.017	2	0.025	280.017	3	0.037	280.017	4	0.022	280.017	5	0.036
280.448	1	0.029	280.448	2	0.025	280.448	3	0.037	280.448	4	0.026	280.448	5	0.036
280.88	1	0.025	280.88	2	0.023	280.88	3	0.035	280.88	4	0.024	280.88	5	0.031
281.311	1	0.022	281.311	2	0.024	281.311	3	0.033	281.311	4	0.021	281.311	5	0.031
281.743	1	0.02	281.743	2	0.024	281.743	3	0.034	281.743	4	0.024	281.743	5	0.033
282.174	1	0.02	282.174	2	0.021	282.174	3	0.034	282.174	4	0.024	282.174	5	0.032
282.605	1	0.021	282.605	2	0.019	282.605	3	0.035	282.605	4	0.024	282.605	5	0.032
283.037	1	0.02	283.037	2	0.019	283.037	3	0.037	283.037	4	0.028	283.037	5	0.036
283.469	1	0.018	283.469	2	0.017	283.469	3	0.035	283.469	4	0.025	283.469	5	0.036
283.9	1	0.018	283.9	2	0.02	283.9	3	0.034	283.9	4	0.022	283.9	5	0.032
284.332	1	0.018	284.332	2	0.024	284.332	3	0.033	284.332	4	0.022	284.332	5	0.032
284.764	1	0.018	284.764	2	0.02	284.764	3	0.031	284.764	4	0.023	284.764	5	0.033
285.195	1	0.02	285.195	2	0.022	285.195	3	0.03	285.195	4	0.021	285.195	5	0.035
285.627	1	0.019	285.627	2	0.024	285.627	3	0.027	285.627	4	0.02	285.627	5	0.037
286.059	1	0.018	286.059	2	0.027	286.059	3	0.025	286.059	4	0.021	286.059	5	0.038
286.491	1	0.021	286.491	2	0.029	286.491	3	0.025	286.491	4	0.019	286.491	5	0.037
286.923	1	0.022	286.923	2	0.033	286.923	3	0.027	286.923	4	0.018	286.923	5	0.034
287.355	1	0.022	287.355	2	0.033	287.355	3	0.028	287.355	4	0.02	287.355	5	0.036
287.787	1	0.024	287.787	2	0.032	287.787	3	0.029	287.787	4	0.019	287.787	5	0.037
288.219	1	0.024	288.219	2	0.031	288.219	3	0.031	288.219	4	0.018	288.219	5	0.037
288.651	1	0.024	288.651	2	0.03	288.651	3	0.03	288.651	4	0.018	288.651	5	0.036
289.083	1	0.022	289.083	2	0.03	289.083	3	0.027	289.083	4	0.017	289.083	5	0.034
289.515	1	0.022	289.515	2	0.032	289.515	3	0.025	289.515	4	0.015	289.515	5	0.032
289.948	1	0.022	289.948	2	0.03	289.948	3	0.023	289.948	4	0.014	289.948	5	0.029
290.38	1	0.022	290.38	2	0.024	290.38	3	0.023	290.38	4	0.013	290.38	5	0.025
290.812	1	0.021	290.812	2	0.017	290.812	3	0.02	290.812	4	0.01	290.812	5	0.021
291.244	1	0.02	291.244	2	0.013	291.244	3	0.017	291.244	4	0.011	291.244	5	0.021
291.677	1	0.021	291.677	2	0.012	291.677	3	0.016	291.677	4	0.012	291.677	5	0.022
292.109	1	0.019	292.109	2	0.012	292.109	3	0.012	292.109	4	0.009	292.109	5	0.019
292.542	1	0.017	292.542	2	0.012	292.542	3	0.008	292.542	4	0.008	292.542	5	0.015
292.974	1	0.018	292.974	2	0.013	292.974	3	0.007	292.974	4	0.012	292.974	5	0.017
293.407	1	0.016	293.407	2	0.013	293.407	3	0.01	293.407	4	0.013	293.407	5	0.02
293.839	1	0.017	293.839	2	0.013	293.839	3	0.012	293.839	4	0.015	293.839	5	0.021
294.272	1	0.018	294.272	2	0.012	294.272	3	0.015	294.272	4	0.016	294.272	5	0.019
294.705	1	0.018	294.705	2	0.014	294.705	3	0.02	294.705	4	0.017	294.705	5	0.02
295.138	1	0.019	295.138	2	0.018	295.138	3	0.023	295.138	4	0.019	295.138	5	0.023
295.57	1	0.021	295.57	2	0.021	295.57	3	0.028	295.57	4	0.022	295.57	5	0.028
296.003	1	0.02	296.003	2	0.024	296.003	3	0.031	296.003	4	0.02	296.003	5	0.027
296.436	1	0.021	296.436	2	0.024	296.436	3	0.032	296.436	4	0.02	296.436	5	0.027
296.869	1	0.025	296.869	2	0.024	296.869	3	0.033	296.869	4	0.018	296.869	5	0.029
297.302	1	0.027	297.302	2	0.024	297.302	3	0.035	297.302	4	0.019	297.302	5	0.032
297.735	1	0.026	297.735	2	0.022	297.735	3	0.034	297.735	4	0.015	297.735	5	0.03
298.168	1	0.028	298.168	2	0.023	298.168	3	0.03	298.168	4	0.015	298.168	5	0.03
298.601	1	0.029	298.601	2	0.023	298.601	3	0.029	298.601	4	0.016	298.601	5	0.031
299.034	1	0.028	299.034	2	0.022	299.034	3	0.026	299.034	4	0.015	299.034	5	0.032
299.467	1	0.027	299.467	2	0.021	299.467	3	0.024	299.467	4	0.015	299.467	5	0.035
299.9	1	0.028	299.9	2	0.024	299.9	3	0.024	299.9	4	0.015	299.9	5	0.036
300.334	1	0.028	300.334	2	0.029	300.334	3	0.025	300.334	4	0.014	300.334	5	0.036
300.767	1	0.03	300.767	2	0.031	300.767	3	0.027	300.767	4	0.016	300.767	5	0.035
301.2	1	0.029	301.2	2	0.032	301.2	3	0.027	301.2	4	0.017	301.2	5	0.034
301.634	1	0.028	301.634	2	0.033	301.634	3	0.026	301.634	4	0.018	301.634	5	0.032
302.067	1	0.029	302.067	2	0.033	302.067	3	0.027	302.067	4	0.019	302.067	5	0.03
302.501	1	0.031	302.501	2	0.034	302.501	3	0.03	302.501	4	0.02	302.501	5	0.031
302.934	1	0.03	302.934	2	0.033	302.934	3	0.031	302.934	4	0.018	302.934	5	0.031
303.368	1	0.03	303.368	2	0.033	303.368	3	0.03	303.368	4	0.017	303.368	5	0.031
303.801	1	0.031	303.801	2	0.034	303.801	3	0.029	303.801	4	0.018	303.801	5	0.031
304.235	1	0.03	304.235	2	0.033	304.235	3	0.028	304.235	4	0.018	304.235	5	0.029
304.669	1	0.029	304.669	2	0.029	304.669	3	0.027	304.669	4	0.018	304.669	5	0.026
305.102	1	0.027	305.102	2	0.024	305.102	3	0.023	305.102	4	0.018	305.102	5	0.023
305.536	1	0.026	305.536	2	0.022	305.536	3	0.018	305.536	4	0.018	305.536	5	0.023
305.97	1	0.023	305.97	2	0.021	305.97	3	0.015	305.97	4	0.018	305.97	5	0.023
306.404	1	0.021	306.404	2	0.02	306.404	3	0.015	306.404	4	0.016	306.404	5	0.022
306.838	1	0.02	306.838	2	0.02	306.838	3	0.015	306.838	4	0.014	306.838	5	0.02
307.272	1	0.02	307.272	2	0.021	307.272	3	0.014	307.272	4	0.015	307.272	5	0.02
307.705	1	0.021	307.705	2	0.022	307.705	3	0.015	307.705	4	0.017	307.705	5	0.019
308.139	1	0.02	308.139	2	0.022	308.139	3	0.014	308.139	4	0.016	308.139	5	0.018
308.574	1	0.02	308.574	2	0.022	308.574	3	0.013	308.574	4	0.015	308.574	5	0.018
309.008	1	0.02	309.008	2	0.023	309.008	3	0.014	309.008	4	0.014	309.008	5	0.019
309.442	1	0.022	309.442	2	0.023	309.442	3	0.015	309.442	4	0.013	309.442	5	0.019
309.876	1	0.023	309.876	2	0.026	309.876	3	0.015	309.876	4	0.015	309.876	5	0.02
310.31	1	0.022	310.31	2	0.026	310.31	3	0.016	310.31	4	0.015	310.31	5	0.019
310.744	1	0.023	310.744	2	0.023	310.744	3	0.017	310.744	4	0.014	310.744	5	0.018
311.179	1	0.022	311.179	2	0.019	311.179	3	0.015	311.179	4	0.015	311.179	5	0.018
311.613	1	0.02	311.613	2	0.017	311.613	3	0.012	311.613	4	0.015	311.613	5	0.019
312.048	1	0.017	312.048	2	0.015	312.048	3	0.009	312.048	4	0.013	312.048	5	0.016
312.482	1	0.016	312.482	2	0.013	312.482	3	0.008	312.482	4	0.012	312.482	5	0.013
312.916	1	0.016	312.916	2	0.013	312.916	3	0.008	312.916	4	0.014	312.916	5	0.012
313.351	1	0.016	313.351	2	0.012	313.351	3	0.007	313.351	4	0.014	313.351	5	0.01
313.786	1	0.014	313.786	2	0.011	313.786	3	0.005	313.786	4	0.013	313.786	5	0.008
314.22	1	0.012	314.22	2	0.01	314.22	3	0.004	314.22	4	0.012	314.22	5	0.007
314.655	1	0.01	314.655	2	0.008	314.655	3	0.004	314.655	4	0.011	314.655	5	0.008
315.09	1	0.01	315.09	2	0.007	315.09	3	0.003	315.09	4	0.01	315.09	5	0.008
315.524	1	0.009	315.524	2	0.007	315.524	3	0.002	315.524	4	0.01	315.524	5	0.008
315.959	1	0.009	315.959	2	0.008	315.959	3	0.001	315.959	4	0.007	315.959	5	0.007
316.394	1	0.01	316.394	2	0.007	316.394	3	-0.001	316.394	4	0.004	316.394	5	0.005
316.829	1	0.009	316.829	2	0.007	316.829	3	-0.001	316.829	4	0.005	316.829	5	0.003
317.264	1	0.01	317.264	2	0.008	317.264	3	-0.001	317.264	4	0.004	317.264	5	0.004
317.699	1	0.01	317.699	2	0.007	317.699	3	0	317.699	4	0.002	317.699	5	0.006
318.134	1	0.012	318.134	2	0.006	318.134	3	0.001	318.134	4	0.001	318.134	5	0.007
318.569	1	0.014	318.569	2	0.006	318.569	3	0.002	318.569	4	0.002	318.569	5	0.009
319.004	1	0.016	319.004	2	0.006	319.004	3	0.001	319.004	4	0.003	319.004	5	0.009
319.439	1	0.015	319.439	2	0.004	319.439	3	0	319.439	4	0.001	319.439	5	0.008
319.874	1	0.016	319.874	2	0.004	319.874	3	0.002	319.874	4	0	319.874	5	0.01
320.309	1	0.016	320.309	2	0.004	320.309	3	0.003	320.309	4	-0.001	320.309	5	0.011
320.744	1	0.019	320.744	2	0.006	320.744	3	0.005	320.744	4	0.002	320.744	5	0.013
321.18	1	0.018	321.18	2	0.008	321.18	3	0.008	321.18	4	0.003	321.18	5	0.014
321.615	1	0.017	321.615	2	0.007	321.615	3	0.008	321.615	4	0.001	321.615	5	0.015
322.05	1	0.016	322.05	2	0.005	322.05	3	0.006	322.05	4	0.001	322.05	5	0.014
322.486	1	0.014	322.486	2	0.003	322.486	3	0.004	322.486	4	0	322.486	5	0.012
322.921	1	0.013	322.921	2	0.003	322.921	3	0.004	322.921	4	0	322.921	5	0.011
323.357	1	0.011	323.357	2	0.003	323.357	3	0.004	323.357	4	-0.001	323.357	5	0.01
323.792	1	0.009	323.792	2	0.002	323.792	3	0.004	323.792	4	-0.001	323.792	5	0.01
324.228	1	0.01	324.228	2	0.004	324.228	3	0.005	324.228	4	-0.001	324.228	5	0.01
324.663	1	0.01	324.663	2	0.005	324.663	3	0.005	324.663	4	0.001	324.663	5	0.008
325.099	1	0.01	325.099	2	0.005	325.099	3	0.004	325.099	4	0.001	325.099	5	0.007
325.535	1	0.009	325.535	2	0.005	325.535	3	0.002	325.535	4	0.002	325.535	5	0.007
325.97	1	0.009	325.97	2	0.005	325.97	3	0.002	325.97	4	0.003	325.97	5	0.007
326.406	1	0.009	326.406	2	0.005	326.406	3	0.002	326.406	4	0.003	326.406	5	0.009
326.842	1	0.01	326.842	2	0.006	326.842	3	0.003	326.842	4	0.003	326.842	5	0.011
327.278	1	0.009	327.278	2	0.007	327.278	3	0.002	327.278	4	0.004	327.278	5	0.011
327.714	1	0.008	327.714	2	0.006	327.714	3	0.002	327.714	4	0.004	327.714	5	0.01
328.15	1	0.008	328.15	2	0.005	328.15	3	0.001	328.15	4	0.004	328.15	5	0.01
328.586	1	0.009	328.586	2	0.006	328.586	3	0.001	328.586	4	0.003	328.586	5	0.01
329.022	1	0.009	329.022	2	0.004	329.022	3	0	329.022	4	0.001	329.022	5	0.01
329.458	1	0.008	329.458	2	0.002	329.458	3	-0.001	329.458	4	0	329.458	5	0.011
329.894	1	0.009	329.894	2	0.002	329.894	3	0	329.894	4	0.001	329.894	5	0.012
330.33	1	0.01	330.33	2	0.003	330.33	3	0	330.33	4	0.002	330.33	5	0.013
330.766	1	0.01	330.766	2	0.003	330.766	3	-0.001	330.766	4	0.003	330.766	5	0.013
331.203	1	0.011	331.203	2	0.002	331.203	3	0	331.203	4	0.004	331.203	5	0.012
331.639	1	0.011	331.639	2	0.002	331.639	3	0.001	331.639	4	0.005	331.639	5	0.012
332.075	1	0.011	332.075	2	0.004	332.075	3	0.002	332.075	4	0.006	332.075	5	0.013
332.512	1	0.01	332.512	2	0.004	332.512	3	0.002	332.512	4	0.006	332.512	5	0.014
332.948	1	0.01	332.948	2	0.004	332.948	3	0.003	332.948	4	0.007	332.948	5	0.015
333.385	1	0.011	333.385	2	0.005	333.385	3	0.004	333.385	4	0.009	333.385	5	0.015
333.821	1	0.012	333.821	2	0.008	333.821	3	0.006	333.821	4	0.01	333.821	5	0.015
334.258	1	0.013	334.258	2	0.009	334.258	3	0.007	334.258	4	0.01	334.258	5	0.014
334.694	1	0.013	334.694	2	0.009	334.694	3	0.007	334.694	4	0.009	334.694	5	0.013
335.131	1	0.013	335.131	2	0.008	335.131	3	0.008	335.131	4	0.009	335.131	5	0.012
335.567	1	0.012	335.567	2	0.008	335.567	3	0.01	335.567	4	0.009	335.567	5	0.012
336.004	1	0.012	336.004	2	0.008	336.004	3	0.009	336.004	4	0.008	336.004	5	0.011
336.441	1	0.011	336.441	2	0.01	336.441	3	0.009	336.441	4	0.008	336.441	5	0.012
336.878	1	0.013	336.878	2	0.01	336.878	3	0.009	336.878	4	0.008	336.878	5	0.011
337.315	1	0.015	337.315	2	0.012	337.315	3	0.011	337.315	4	0.009	337.315	5	0.012
337.751	1	0.017	337.751	2	0.012	337.751	3	0.01	337.751	4	0.01	337.751	5	0.011
338.188	1	0.017	338.188	2	0.013	338.188	3	0.01	338.188	4	0.01	338.188	5	0.011
338.625	1	0.016	338.625	2	0.012	338.625	3	0.01	338.625	4	0.011	338.625	5	0.012
339.062	1	0.017	339.062	2	0.012	339.062	3	0.011	339.062	4	0.011	339.062	5	0.012
339.499	1	0.018	339.499	2	0.013	339.499	3	0.013	339.499	4	0.012	339.499	5	0.013
339.936	1	0.018	339.936	2	0.014	339.936	3	0.013	339.936	4	0.013	339.936	5	0.014
340.374	1	0.019	340.374	2	0.016	340.374	3	0.014	340.374	4	0.015	340.374	5	0.014
340.811	1	0.021	340.811	2	0.018	340.811	3	0.014	340.811	4	0.016	340.811	5	0.015
341.248	1	0.023	341.248	2	0.019	341.248	3	0.016	341.248	4	0.016	341.248	5	0.015
341.685	1	0.023	341.685	2	0.019	341.685	3	0.017	341.685	4	0.017	341.685	5	0.015
342.122	1	0.023	342.122	2	0.019	342.122	3	0.019	342.122	4	0.016	342.122	5	0.015
342.56	1	0.021	342.56	2	0.018	342.56	3	0.02	342.56	4	0.015	342.56	5	0.015
342.997	1	0.021	342.997	2	0.019	342.997	3	0.02	342.997	4	0.015	342.997	5	0.014
343.435	1	0.021	343.435	2	0.02	343.435	3	0.02	343.435	4	0.016	343.435	5	0.014
343.872	1	0.021	343.872	2	0.021	343.872	3	0.02	343.872	4	0.017	343.872	5	0.014
344.31	1	0.021	344.31	2	0.021	344.31	3	0.019	344.31	4	0.016	344.31	5	0.013
344.747	1	0.02	344.747	2	0.021	344.747	3	0.018	344.747	4	0.016	344.747	5	0.013
345.185	1	0.02	345.185	2	0.02	345.185	3	0.017	345.185	4	0.015	345.185	5	0.014
345.622	1	0.019	345.622	2	0.019	345.622	3	0.017	345.622	4	0.014	345.622	5	0.013
346.06	1	0.018	346.06	2	0.018	346.06	3	0.016	346.06	4	0.013	346.06	5	0.013
346.498	1	0.019	346.498	2	0.018	346.498	3	0.016	346.498	4	0.014	346.498	5	0.013
346.935	1	0.02	346.935	2	0.019	346.935	3	0.016	346.935	4	0.014	346.935	5	0.013
347.373	1	0.021	347.373	2	0.018	347.373	3	0.015	347.373	4	0.015	347.373	5	0.013
347.811	1	0.02	347.811	2	0.018	347.811	3	0.014	347.811	4	0.014	347.811	5	0.013
348.249	1	0.02	348.249	2	0.017	348.249	3	0.015	348.249	4	0.013	348.249	5	0.013
348.687	1	0.019	348.687	2	0.016	348.687	3	0.014	348.687	4	0.012	348.687	5	0.014
349.125	1	0.019	349.125	2	0.015	349.125	3	0.013	349.125	4	0.013	349.125	5	0.014
349.563	1	0.02	349.563	2	0.016	349.563	3	0.014	349.563	4	0.013	349.563	5	0.014
350.001	1	0.021	350.001	2	0.016	350.001	3	0.014	350.001	4	0.013	350.001	5	0.013
350.439	1	0.021	350.439	2	0.015	350.439	3	0.012	350.439	4	0.014	350.439	5	0.013
350.877	1	0.022	350.877	2	0.015	350.877	3	0.013	350.877	4	0.013	350.877	5	0.013
351.315	1	0.021	351.315	2	0.015	351.315	3	0.014	351.315	4	0.012	351.315	5	0.013
351.753	1	0.021	351.753	2	0.016	351.753	3	0.014	351.753	4	0.011	351.753	5	0.014
352.192	1	0.022	352.192	2	0.016	352.192	3	0.014	352.192	4	0.011	352.192	5	0.013
352.63	1	0.022	352.63	2	0.016	352.63	3	0.015	352.63	4	0.012	352.63	5	0.014
353.068	1	0.022	353.068	2	0.015	353.068	3	0.014	353.068	4	0.012	353.068	5	0.013
353.507	1	0.022	353.507	2	0.016	353.507	3	0.015	353.507	4	0.011	353.507	5	0.014
353.945	1	0.023	353.945	2	0.016	353.945	3	0.015	353.945	4	0.011	353.945	5	0.015
354.383	1	0.022	354.383	2	0.016	354.383	3	0.014	354.383	4	0.01	354.383	5	0.015
354.822	1	0.022	354.822	2	0.016	354.822	3	0.014	354.822	4	0.009	354.822	5	0.014
355.26	1	0.022	355.26	2	0.017	355.26	3	0.014	355.26	4	0.009	355.26	5	0.015
355.699	1	0.022	355.699	2	0.017	355.699	3	0.013	355.699	4	0.01	355.699	5	0.015
356.138	1	0.022	356.138	2	0.017	356.138	3	0.012	356.138	4	0.01	356.138	5	0.013
356.576	1	0.022	356.576	2	0.016	356.576	3	0.012	356.576	4	0.011	356.576	5	0.013
357.015	1	0.023	357.015	2	0.017	357.015	3	0.013	357.015	4	0.013	357.015	5	0.014
357.454	1	0.024	357.454	2	0.018	357.454	3	0.013	357.454	4	0.013	357.454	5	0.015
357.893	1	0.026	357.893	2	0.018	357.893	3	0.014	357.893	4	0.014	357.893	5	0.015
358.331	1	0.027	358.331	2	0.019	358.331	3	0.014	358.331	4	0.014	358.331	5	0.015
358.77	1	0.028	358.77	2	0.02	358.77	3	0.014	358.77	4	0.014	358.77	5	0.014
359.209	1	0.027	359.209	2	0.02	359.209	3	0.014	359.209	4	0.015	359.209	5	0.013
359.648	1	0.027	359.648	2	0.019	359.648	3	0.015	359.648	4	0.015	359.648	5	0.013
360.087	1	0.028	360.087	2	0.019	360.087	3	0.015	360.087	4	0.015	360.087	5	0.013
360.526	1	0.027	360.526	2	0.02	360.526	3	0.015	360.526	4	0.015	360.526	5	0.013
360.965	1	0.027	360.965	2	0.021	360.965	3	0.015	360.965	4	0.014	360.965	5	0.013
361.404	1	0.026	361.404	2	0.022	361.404	3	0.016	361.404	4	0.014	361.404	5	0.014
361.843	1	0.025	361.843	2	0.022	361.843	3	0.015	361.843	4	0.014	361.843	5	0.014
362.283	1	0.025	362.283	2	0.022	362.283	3	0.015	362.283	4	0.013	362.283	5	0.014
362.722	1	0.025	362.722	2	0.022	362.722	3	0.015	362.722	4	0.012	362.722	5	0.014
363.161	1	0.024	363.161	2	0.02	363.161	3	0.014	363.161	4	0.011	363.161	5	0.013
363.6	1	0.023	363.6	2	0.019	363.6	3	0.015	363.6	4	0.011	363.6	5	0.013
364.04	1	0.024	364.04	2	0.02	364.04	3	0.016	364.04	4	0.011	364.04	5	0.013
364.479	1	0.025	364.479	2	0.021	364.479	3	0.017	364.479	4	0.012	364.479	5	0.014
364.919	1	0.025	364.919	2	0.021	364.919	3	0.017	364.919	4	0.012	364.919	5	0.014
365.358	1	0.026	365.358	2	0.02	365.358	3	0.018	365.358	4	0.011	365.358	5	0.014
365.798	1	0.026	365.798	2	0.019	365.798	3	0.018	365.798	4	0.012	365.798	5	0.014
366.237	1	0.026	366.237	2	0.021	366.237	3	0.018	366.237	4	0.012	366.237	5	0.015
366.677	1	0.026	366.677	2	0.021	366.677	3	0.017	366.677	4	0.012	366.677	5	0.014
367.117	1	0.027	367.117	2	0.021	367.117	3	0.017	367.117	4	0.012	367.117	5	0.015
367.556	1	0.026	367.556	2	0.02	367.556	3	0.017	367.556	4	0.013	367.556	5	0.015
367.996	1	0.025	367.996	2	0.022	367.996	3	0.016	367.996	4	0.013	367.996	5	0.015
368.436	1	0.025	368.436	2	0.022	368.436	3	0.015	368.436	4	0.014	368.436	5	0.015
368.876	1	0.026	368.876	2	0.022	368.876	3	0.015	368.876	4	0.014	368.876	5	0.015
369.315	1	0.026	369.315	2	0.022	369.315	3	0.016	369.315	4	0.013	369.315	5	0.014
369.755	1	0.026	369.755	2	0.023	369.755	3	0.015	369.755	4	0.013	369.755	5	0.014
370.195	1	0.026	370.195	2	0.023	370.195	3	0.014	370.195	4	0.014	370.195	5	0.013
370.635	1	0.026	370.635	2	0.023	370.635	3	0.014	370.635	4	0.013	370.635	5	0.011
371.075	1	0.026	371.075	2	0.021	371.075	3	0.013	371.075	4	0.012	371.075	5	0.01
371.515	1	0.026	371.515	2	0.021	371.515	3	0.014	371.515	4	0.013	371.515	5	0.011
371.955	1	0.026	371.955	2	0.021	371.955	3	0.015	371.955	4	0.014	371.955	5	0.011
372.396	1	0.028	372.396	2	0.022	372.396	3	0.016	372.396	4	0.015	372.396	5	0.011
372.836	1	0.029	372.836	2	0.022	372.836	3	0.017	372.836	4	0.015	372.836	5	0.012
373.276	1	0.029	373.276	2	0.022	373.276	3	0.017	373.276	4	0.015	373.276	5	0.013
373.716	1	0.028	373.716	2	0.022	373.716	3	0.018	373.716	4	0.016	373.716	5	0.013
374.156	1	0.028	374.156	2	0.021	374.156	3	0.017	374.156	4	0.016	374.156	5	0.014
374.597	1	0.029	374.597	2	0.02	374.597	3	0.016	374.597	4	0.017	374.597	5	0.015
375.037	1	0.029	375.037	2	0.02	375.037	3	0.017	375.037	4	0.017	375.037	5	0.016
375.478	1	0.03	375.478	2	0.021	375.478	3	0.018	375.478	4	0.017	375.478	5	0.017
375.918	1	0.031	375.918	2	0.022	375.918	3	0.018	375.918	4	0.018	375.918	5	0.019
376.359	1	0.031	376.359	2	0.023	376.359	3	0.018	376.359	4	0.018	376.359	5	0.019
376.799	1	0.031	376.799	2	0.023	376.799	3	0.018	376.799	4	0.017	376.799	5	0.018
377.24	1	0.03	377.24	2	0.022	377.24	3	0.017	377.24	4	0.017	377.24	5	0.018
377.68	1	0.031	377.68	2	0.022	377.68	3	0.018	377.68	4	0.016	377.68	5	0.017
378.121	1	0.032	378.121	2	0.023	378.121	3	0.018	378.121	4	0.017	378.121	5	0.017
378.562	1	0.032	378.562	2	0.023	378.562	3	0.018	378.562	4	0.017	378.562	5	0.017
379.003	1	0.032	379.003	2	0.024	379.003	3	0.017	379.003	4	0.018	379.003	5	0.017
379.443	1	0.032	379.443	2	0.024	379.443	3	0.018	379.443	4	0.017	379.443	5	0.017
379.884	1	0.033	379.884	2	0.024	379.884	3	0.018	379.884	4	0.018	379.884	5	0.017
380.325	1	0.034	380.325	2	0.025	380.325	3	0.018	380.325	4	0.018	380.325	5	0.016
380.766	1	0.034	380.766	2	0.025	380.766	3	0.019	380.766	4	0.018	380.766	5	0.016
381.207	1	0.035	381.207	2	0.025	381.207	3	0.019	381.207	4	0.018	381.207	5	0.016
381.648	1	0.036	381.648	2	0.025	381.648	3	0.019	381.648	4	0.018	381.648	5	0.016
382.089	1	0.037	382.089	2	0.025	382.089	3	0.019	382.089	4	0.018	382.089	5	0.016
382.53	1	0.037	382.53	2	0.025	382.53	3	0.019	382.53	4	0.018	382.53	5	0.016
382.971	1	0.038	382.971	2	0.024	382.971	3	0.019	382.971	4	0.018	382.971	5	0.016
383.412	1	0.04	383.412	2	0.024	383.412	3	0.019	383.412	4	0.018	383.412	5	0.016
383.854	1	0.041	383.854	2	0.024	383.854	3	0.019	383.854	4	0.018	383.854	5	0.016
384.295	1	0.041	384.295	2	0.025	384.295	3	0.02	384.295	4	0.018	384.295	5	0.016
384.736	1	0.041	384.736	2	0.025	384.736	3	0.018	384.736	4	0.017	384.736	5	0.016
385.177	1	0.041	385.177	2	0.025	385.177	3	0.018	385.177	4	0.017	385.177	5	0.015
385.619	1	0.041	385.619	2	0.025	385.619	3	0.018	385.619	4	0.016	385.619	5	0.015
386.06	1	0.041	386.06	2	0.025	386.06	3	0.017	386.06	4	0.015	386.06	5	0.014
386.502	1	0.042	386.502	2	0.025	386.502	3	0.018	386.502	4	0.015	386.502	5	0.015
386.943	1	0.042	386.943	2	0.026	386.943	3	0.018	386.943	4	0.015	386.943	5	0.015
387.385	1	0.043	387.385	2	0.027	387.385	3	0.018	387.385	4	0.016	387.385	5	0.015
387.826	1	0.043	387.826	2	0.028	387.826	3	0.019	387.826	4	0.016	387.826	5	0.015
388.268	1	0.043	388.268	2	0.029	388.268	3	0.02	388.268	4	0.016	388.268	5	0.015
388.709	1	0.044	388.709	2	0.029	388.709	3	0.021	388.709	4	0.016	388.709	5	0.016
389.151	1	0.044	389.151	2	0.029	389.151	3	0.021	389.151	4	0.017	389.151	5	0.016
389.593	1	0.046	389.593	2	0.031	389.593	3	0.023	389.593	4	0.018	389.593	5	0.017
390.035	1	0.046	390.035	2	0.031	390.035	3	0.024	390.035	4	0.019	390.035	5	0.018
390.476	1	0.047	390.476	2	0.032	390.476	3	0.024	390.476	4	0.02	390.476	5	0.018
390.918	1	0.047	390.918	2	0.032	390.918	3	0.024	390.918	4	0.021	390.918	5	0.018
391.36	1	0.047	391.36	2	0.033	391.36	3	0.025	391.36	4	0.02	391.36	5	0.018
391.802	1	0.047	391.802	2	0.033	391.802	3	0.025	391.802	4	0.021	391.802	5	0.018
392.244	1	0.048	392.244	2	0.034	392.244	3	0.026	392.244	4	0.022	392.244	5	0.018
392.686	1	0.049	392.686	2	0.034	392.686	3	0.026	392.686	4	0.023	392.686	5	0.019
393.128	1	0.05	393.128	2	0.035	393.128	3	0.027	393.128	4	0.023	393.128	5	0.019
393.57	1	0.05	393.57	2	0.036	393.57	3	0.027	393.57	4	0.024	393.57	5	0.019
394.012	1	0.051	394.012	2	0.036	394.012	3	0.027	394.012	4	0.024	394.012	5	0.019
394.455	1	0.05	394.455	2	0.037	394.455	3	0.027	394.455	4	0.025	394.455	5	0.019
394.897	1	0.051	394.897	2	0.037	394.897	3	0.028	394.897	4	0.025	394.897	5	0.021
395.339	1	0.052	395.339	2	0.037	395.339	3	0.028	395.339	4	0.025	395.339	5	0.021
395.781	1	0.052	395.781	2	0.037	395.781	3	0.029	395.781	4	0.025	395.781	5	0.022
396.224	1	0.052	396.224	2	0.037	396.224	3	0.029	396.224	4	0.025	396.224	5	0.021
396.666	1	0.053	396.666	2	0.037	396.666	3	0.029	396.666	4	0.025	396.666	5	0.021
397.108	1	0.053	397.108	2	0.036	397.108	3	0.029	397.108	4	0.023	397.108	5	0.02
397.551	1	0.053	397.551	2	0.036	397.551	3	0.029	397.551	4	0.022	397.551	5	0.02
397.993	1	0.054	397.993	2	0.036	397.993	3	0.029	397.993	4	0.022	397.993	5	0.02
398.436	1	0.054	398.436	2	0.035	398.436	3	0.028	398.436	4	0.022	398.436	5	0.02
398.879	1	0.055	398.879	2	0.036	398.879	3	0.027	398.879	4	0.022	398.879	5	0.02
399.321	1	0.056	399.321	2	0.036	399.321	3	0.027	399.321	4	0.022	399.321	5	0.019
399.764	1	0.056	399.764	2	0.036	399.764	3	0.028	399.764	4	0.022	399.764	5	0.019
400.207	1	0.057	400.207	2	0.037	400.207	3	0.029	400.207	4	0.022	400.207	5	0.018
400.649	1	0.058	400.649	2	0.038	400.649	3	0.029	400.649	4	0.023	400.649	5	0.018
401.092	1	0.059	401.092	2	0.039	401.092	3	0.03	401.092	4	0.024	401.092	5	0.019
401.535	1	0.06	401.535	2	0.04	401.535	3	0.031	401.535	4	0.024	401.535	5	0.02
401.978	1	0.061	401.978	2	0.041	401.978	3	0.031	401.978	4	0.024	401.978	5	0.021
402.421	1	0.063	402.421	2	0.043	402.421	3	0.032	402.421	4	0.026	402.421	5	0.022
402.864	1	0.064	402.864	2	0.044	402.864	3	0.033	402.864	4	0.027	402.864	5	0.023
403.307	1	0.065	403.307	2	0.045	403.307	3	0.034	403.307	4	0.028	403.307	5	0.025
403.75	1	0.066	403.75	2	0.046	403.75	3	0.035	403.75	4	0.028	403.75	5	0.026
404.193	1	0.066	404.193	2	0.046	404.193	3	0.036	404.193	4	0.028	404.193	5	0.027
404.636	1	0.067	404.636	2	0.047	404.636	3	0.037	404.636	4	0.028	404.636	5	0.027
405.079	1	0.068	405.079	2	0.047	405.079	3	0.037	405.079	4	0.029	405.079	5	0.028
405.522	1	0.068	405.522	2	0.048	405.522	3	0.038	405.522	4	0.03	405.522	5	0.029
405.965	1	0.068	405.965	2	0.048	405.965	3	0.038	405.965	4	0.029	405.965	5	0.029
406.409	1	0.069	406.409	2	0.048	406.409	3	0.038	406.409	4	0.029	406.409	5	0.029
406.852	1	0.07	406.852	2	0.048	406.852	3	0.038	406.852	4	0.029	406.852	5	0.03
407.295	1	0.069	407.295	2	0.048	407.295	3	0.038	407.295	4	0.029	407.295	5	0.029
407.739	1	0.069	407.739	2	0.047	407.739	3	0.038	407.739	4	0.028	407.739	5	0.028
408.182	1	0.07	408.182	2	0.047	408.182	3	0.038	408.182	4	0.027	408.182	5	0.027
408.626	1	0.071	408.626	2	0.048	408.626	3	0.038	408.626	4	0.028	408.626	5	0.027
409.069	1	0.072	409.069	2	0.048	409.069	3	0.038	409.069	4	0.028	409.069	5	0.026
409.513	1	0.073	409.513	2	0.048	409.513	3	0.037	409.513	4	0.029	409.513	5	0.026
409.956	1	0.073	409.956	2	0.048	409.956	3	0.037	409.956	4	0.029	409.956	5	0.026
410.4	1	0.074	410.4	2	0.047	410.4	3	0.036	410.4	4	0.028	410.4	5	0.026
410.843	1	0.074	410.843	2	0.048	410.843	3	0.036	410.843	4	0.029	410.843	5	0.026
411.287	1	0.075	411.287	2	0.049	411.287	3	0.037	411.287	4	0.03	411.287	5	0.027
411.731	1	0.075	411.731	2	0.05	411.731	3	0.037	411.731	4	0.03	411.731	5	0.026
412.175	1	0.076	412.175	2	0.05	412.175	3	0.037	412.175	4	0.031	412.175	5	0.026
412.619	1	0.076	412.619	2	0.051	412.619	3	0.038	412.619	4	0.032	412.619	5	0.027
413.062	1	0.076	413.062	2	0.05	413.062	3	0.038	413.062	4	0.033	413.062	5	0.027
413.506	1	0.076	413.506	2	0.051	413.506	3	0.038	413.506	4	0.033	413.506	5	0.027
413.95	1	0.076	413.95	2	0.052	413.95	3	0.038	413.95	4	0.034	413.95	5	0.028
414.394	1	0.077	414.394	2	0.053	414.394	3	0.037	414.394	4	0.034	414.394	5	0.028
414.838	1	0.077	414.838	2	0.054	414.838	3	0.038	414.838	4	0.034	414.838	5	0.028
415.282	1	0.078	415.282	2	0.055	415.282	3	0.039	415.282	4	0.035	415.282	5	0.028
415.726	1	0.079	415.726	2	0.055	415.726	3	0.039	415.726	4	0.036	415.726	5	0.028
416.171	1	0.079	416.171	2	0.054	416.171	3	0.039	416.171	4	0.036	416.171	5	0.028
416.615	1	0.08	416.615	2	0.055	416.615	3	0.039	416.615	4	0.036	416.615	5	0.028
417.059	1	0.081	417.059	2	0.056	417.059	3	0.039	417.059	4	0.037	417.059	5	0.029
417.503	1	0.081	417.503	2	0.056	417.503	3	0.04	417.503	4	0.037	417.503	5	0.029
417.948	1	0.081	417.948	2	0.057	417.948	3	0.04	417.948	4	0.037	417.948	5	0.03
418.392	1	0.081	418.392	2	0.057	418.392	3	0.041	418.392	4	0.036	418.392	5	0.03
418.836	1	0.082	418.836	2	0.056	418.836	3	0.041	418.836	4	0.036	418.836	5	0.03
419.281	1	0.08	419.281	2	0.056	419.281	3	0.042	419.281	4	0.037	419.281	5	0.03
419.725	1	0.08	419.725	2	0.055	419.725	3	0.042	419.725	4	0.036	419.725	5	0.031
420.17	1	0.079	420.17	2	0.056	420.17	3	0.042	420.17	4	0.035	420.17	5	0.031
420.614	1	0.08	420.614	2	0.056	420.614	3	0.042	420.614	4	0.035	420.614	5	0.031
421.059	1	0.079	421.059	2	0.056	421.059	3	0.042	421.059	4	0.035	421.059	5	0.031
421.504	1	0.078	421.504	2	0.056	421.504	3	0.042	421.504	4	0.035	421.504	5	0.031
421.948	1	0.078	421.948	2	0.055	421.948	3	0.042	421.948	4	0.034	421.948	5	0.031
422.393	1	0.078	422.393	2	0.055	422.393	3	0.042	422.393	4	0.034	422.393	5	0.031
422.838	1	0.077	422.838	2	0.055	422.838	3	0.041	422.838	4	0.034	422.838	5	0.031
423.282	1	0.077	423.282	2	0.054	423.282	3	0.041	423.282	4	0.035	423.282	5	0.031
423.727	1	0.076	423.727	2	0.054	423.727	3	0.04	423.727	4	0.035	423.727	5	0.031
424.172	1	0.076	424.172	2	0.054	424.172	3	0.041	424.172	4	0.035	424.172	5	0.032
424.617	1	0.076	424.617	2	0.054	424.617	3	0.04	424.617	4	0.036	424.617	5	0.031
425.062	1	0.075	425.062	2	0.053	425.062	3	0.04	425.062	4	0.036	425.062	5	0.031
425.507	1	0.074	425.507	2	0.052	425.507	3	0.039	425.507	4	0.037	425.507	5	0.032
425.952	1	0.073	425.952	2	0.052	425.952	3	0.039	425.952	4	0.037	425.952	5	0.032
426.397	1	0.072	426.397	2	0.052	426.397	3	0.039	426.397	4	0.037	426.397	5	0.032
426.842	1	0.072	426.842	2	0.052	426.842	3	0.038	426.842	4	0.038	426.842	5	0.033
427.287	1	0.071	427.287	2	0.052	427.287	3	0.038	427.287	4	0.037	427.287	5	0.033
427.733	1	0.071	427.733	2	0.051	427.733	3	0.038	427.733	4	0.037	427.733	5	0.033
428.178	1	0.071	428.178	2	0.051	428.178	3	0.039	428.178	4	0.037	428.178	5	0.033
428.623	1	0.069	428.623	2	0.05	428.623	3	0.039	428.623	4	0.037	428.623	5	0.033
429.068	1	0.068	429.068	2	0.05	429.068	3	0.039	429.068	4	0.037	429.068	5	0.033
429.514	1	0.067	429.514	2	0.05	429.514	3	0.04	429.514	4	0.037	429.514	5	0.033
429.959	1	0.066	429.959	2	0.05	429.959	3	0.041	429.959	4	0.037	429.959	5	0.034
430.404	1	0.065	430.404	2	0.049	430.404	3	0.041	430.404	4	0.036	430.404	5	0.034
430.85	1	0.064	430.85	2	0.049	430.85	3	0.04	430.85	4	0.036	430.85	5	0.033
431.295	1	0.063	431.295	2	0.048	431.295	3	0.04	431.295	4	0.035	431.295	5	0.033
431.741	1	0.063	431.741	2	0.048	431.741	3	0.041	431.741	4	0.035	431.741	5	0.033
432.187	1	0.062	432.187	2	0.048	432.187	3	0.041	432.187	4	0.036	432.187	5	0.033
432.632	1	0.061	432.632	2	0.048	432.632	3	0.04	432.632	4	0.036	432.632	5	0.034
433.078	1	0.06	433.078	2	0.047	433.078	3	0.04	433.078	4	0.036	433.078	5	0.034
433.524	1	0.06	433.524	2	0.047	433.524	3	0.04	433.524	4	0.036	433.524	5	0.034
433.969	1	0.059	433.969	2	0.046	433.969	3	0.04	433.969	4	0.036	433.969	5	0.034
434.415	1	0.058	434.415	2	0.046	434.415	3	0.04	434.415	4	0.036	434.415	5	0.035
434.861	1	0.057	434.861	2	0.045	434.861	3	0.04	434.861	4	0.036	434.861	5	0.035
435.307	1	0.055	435.307	2	0.045	435.307	3	0.04	435.307	4	0.037	435.307	5	0.035
435.753	1	0.055	435.753	2	0.045	435.753	3	0.04	435.753	4	0.037	435.753	5	0.036
436.199	1	0.054	436.199	2	0.044	436.199	3	0.04	436.199	4	0.038	436.199	5	0.037
436.645	1	0.053	436.645	2	0.044	436.645	3	0.041	436.645	4	0.039	436.645	5	0.038
437.091	1	0.051	437.091	2	0.043	437.091	3	0.041	437.091	4	0.04	437.091	5	0.038
437.537	1	0.05	437.537	2	0.043	437.537	3	0.042	437.537	4	0.04	437.537	5	0.038
437.983	1	0.049	437.983	2	0.043	437.983	3	0.042	437.983	4	0.041	437.983	5	0.039
438.429	1	0.047	438.429	2	0.043	438.429	3	0.042	438.429	4	0.041	438.429	5	0.039
438.875	1	0.046	438.875	2	0.042	438.875	3	0.042	438.875	4	0.041	438.875	5	0.039
439.321	1	0.045	439.321	2	0.042	439.321	3	0.042	439.321	4	0.041	439.321	5	0.04
439.768	1	0.043	439.768	2	0.041	439.768	3	0.041	439.768	4	0.041	439.768	5	0.04
440.214	1	0.042	440.214	2	0.04	440.214	3	0.041	440.214	4	0.041	440.214	5	0.04
440.66	1	0.041	440.66	2	0.039	440.66	3	0.041	440.66	4	0.04	440.66	5	0.04
441.107	1	0.04	441.107	2	0.039	441.107	3	0.041	441.107	4	0.04	441.107	5	0.04
441.553	1	0.039	441.553	2	0.039	441.553	3	0.041	441.553	4	0.039	441.553	5	0.04
441.999	1	0.037	441.999	2	0.038	441.999	3	0.04	441.999	4	0.039	441.999	5	0.04
442.446	1	0.036	442.446	2	0.037	442.446	3	0.04	442.446	4	0.038	442.446	5	0.039
442.892	1	0.034	442.892	2	0.036	442.892	3	0.039	442.892	4	0.038	442.892	5	0.038
443.339	1	0.033	443.339	2	0.035	443.339	3	0.039	443.339	4	0.038	443.339	5	0.038
443.786	1	0.032	443.786	2	0.035	443.786	3	0.039	443.786	4	0.038	443.786	5	0.038
444.232	1	0.031	444.232	2	0.034	444.232	3	0.038	444.232	4	0.038	444.232	5	0.038
444.679	1	0.029	444.679	2	0.033	444.679	3	0.038	444.679	4	0.038	444.679	5	0.037
445.126	1	0.028	445.126	2	0.032	445.126	3	0.038	445.126	4	0.038	445.126	5	0.037
445.572	1	0.026	445.572	2	0.032	445.572	3	0.039	445.572	4	0.038	445.572	5	0.037
446.019	1	0.025	446.019	2	0.031	446.019	3	0.039	446.019	4	0.038	446.019	5	0.037
446.466	1	0.023	446.466	2	0.03	446.466	3	0.038	446.466	4	0.038	446.466	5	0.036
446.913	1	0.022	446.913	2	0.03	446.913	3	0.038	446.913	4	0.038	446.913	5	0.036
447.36	1	0.021	447.36	2	0.03	447.36	3	0.037	447.36	4	0.038	447.36	5	0.037
447.807	1	0.02	447.807	2	0.029	447.807	3	0.038	447.807	4	0.039	447.807	5	0.038
448.254	1	0.019	448.254	2	0.028	448.254	3	0.038	448.254	4	0.039	448.254	5	0.038
448.701	1	0.018	448.701	2	0.028	448.701	3	0.038	448.701	4	0.038	448.701	5	0.038
449.148	1	0.018	449.148	2	0.027	449.148	3	0.037	449.148	4	0.038	449.148	5	0.038
449.595	1	0.017	449.595	2	0.027	449.595	3	0.037	449.595	4	0.038	449.595	5	0.038
450.042	1	0.016	450.042	2	0.027	450.042	3	0.037	450.042	4	0.038	450.042	5	0.039
450.49	1	0.016	450.49	2	0.026	450.49	3	0.037	450.49	4	0.038	450.49	5	0.039
450.937	1	0.015	450.937	2	0.026	450.937	3	0.037	450.937	4	0.038	450.937	5	0.039
451.384	1	0.015	451.384	2	0.026	451.384	3	0.037	451.384	4	0.038	451.384	5	0.039
451.831	1	0.014	451.831	2	0.025	451.831	3	0.038	451.831	4	0.038	451.831	5	0.039
452.279	1	0.013	452.279	2	0.024	452.279	3	0.037	452.279	4	0.037	452.279	5	0.039
452.726	1	0.012	452.726	2	0.024	452.726	3	0.037	452.726	4	0.037	452.726	5	0.039
453.174	1	0.012	453.174	2	0.024	453.174	3	0.037	453.174	4	0.037	453.174	5	0.038
453.621	1	0.011	453.621	2	0.023	453.621	3	0.037	453.621	4	0.037	453.621	5	0.038
454.069	1	0.01	454.069	2	0.022	454.069	3	0.037	454.069	4	0.036	454.069	5	0.038
454.516	1	0.009	454.516	2	0.022	454.516	3	0.036	454.516	4	0.036	454.516	5	0.038
454.964	1	0.008	454.964	2	0.021	454.964	3	0.035	454.964	4	0.036	454.964	5	0.038
455.411	1	0.007	455.411	2	0.02	455.411	3	0.035	455.411	4	0.036	455.411	5	0.037
455.859	1	0.006	455.859	2	0.019	455.859	3	0.034	455.859	4	0.035	455.859	5	0.037
456.307	1	0.005	456.307	2	0.018	456.307	3	0.033	456.307	4	0.035	456.307	5	0.037
456.754	1	0.005	456.754	2	0.018	456.754	3	0.032	456.754	4	0.035	456.754	5	0.036
457.202	1	0.004	457.202	2	0.017	457.202	3	0.032	457.202	4	0.035	457.202	5	0.036
457.65	1	0.004	457.65	2	0.016	457.65	3	0.032	457.65	4	0.034	457.65	5	0.036
458.098	1	0.003	458.098	2	0.016	458.098	3	0.031	458.098	4	0.034	458.098	5	0.036
458.546	1	0.002	458.546	2	0.016	458.546	3	0.031	458.546	4	0.034	458.546	5	0.036
458.994	1	0.002	458.994	2	0.016	458.994	3	0.031	458.994	4	0.035	458.994	5	0.036
459.442	1	0.001	459.442	2	0.016	459.442	3	0.03	459.442	4	0.034	459.442	5	0.036
459.89	1	0.001	459.89	2	0.016	459.89	3	0.03	459.89	4	0.034	459.89	5	0.037
460.338	1	0.001	460.338	2	0.016	460.338	3	0.03	460.338	4	0.034	460.338	5	0.037
460.786	1	0.002	460.786	2	0.016	460.786	3	0.03	460.786	4	0.035	460.786	5	0.037
461.234	1	0.002	461.234	2	0.016	461.234	3	0.03	461.234	4	0.035	461.234	5	0.037
461.682	1	0.002	461.682	2	0.016	461.682	3	0.03	461.682	4	0.035	461.682	5	0.037
462.131	1	0.002	462.131	2	0.015	462.131	3	0.03	462.131	4	0.035	462.131	5	0.037
462.579	1	0.002	462.579	2	0.015	462.579	3	0.03	462.579	4	0.034	462.579	5	0.037
463.027	1	0.002	463.027	2	0.016	463.027	3	0.029	463.027	4	0.034	463.027	5	0.037
463.475	1	0.001	463.475	2	0.015	463.475	3	0.029	463.475	4	0.034	463.475	5	0.036
463.924	1	0.002	463.924	2	0.015	463.924	3	0.029	463.924	4	0.033	463.924	5	0.036
464.372	1	0.001	464.372	2	0.015	464.372	3	0.029	464.372	4	0.033	464.372	5	0.036
464.821	1	0.001	464.821	2	0.015	464.821	3	0.029	464.821	4	0.033	464.821	5	0.036
465.269	1	0.001	465.269	2	0.014	465.269	3	0.029	465.269	4	0.033	465.269	5	0.036
465.718	1	0.001	465.718	2	0.015	465.718	3	0.029	465.718	4	0.032	465.718	5	0.036
466.166	1	0.001	466.166	2	0.014	466.166	3	0.028	466.166	4	0.032	466.166	5	0.036
466.615	1	0.001	466.615	2	0.014	466.615	3	0.028	466.615	4	0.031	466.615	5	0.036
467.064	1	0.001	467.064	2	0.014	467.064	3	0.028	467.064	4	0.031	467.064	5	0.035
467.512	1	0.001	467.512	2	0.014	467.512	3	0.028	467.512	4	0.031	467.512	5	0.035
467.961	1	0.001	467.961	2	0.014	467.961	3	0.027	467.961	4	0.03	467.961	5	0.035
468.41	1	0.001	468.41	2	0.014	468.41	3	0.027	468.41	4	0.03	468.41	5	0.035
468.858	1	0.001	468.858	2	0.013	468.858	3	0.027	468.858	4	0.03	468.858	5	0.035
469.307	1	0	469.307	2	0.013	469.307	3	0.026	469.307	4	0.029	469.307	5	0.034
469.756	1	0	469.756	2	0.012	469.756	3	0.025	469.756	4	0.028	469.756	5	0.033
470.205	1	0	470.205	2	0.011	470.205	3	0.024	470.205	4	0.028	470.205	5	0.033
470.654	1	0	470.654	2	0.01	470.654	3	0.023	470.654	4	0.028	470.654	5	0.032
471.103	1	0	471.103	2	0.01	471.103	3	0.023	471.103	4	0.027	471.103	5	0.032
471.552	1	0	471.552	2	0.01	471.552	3	0.022	471.552	4	0.027	471.552	5	0.032
472.001	1	-0.001	472.001	2	0.009	472.001	3	0.021	472.001	4	0.027	472.001	5	0.031
472.45	1	-0.001	472.45	2	0.009	472.45	3	0.021	472.45	4	0.026	472.45	5	0.031
472.899	1	-0.001	472.899	2	0.008	472.899	3	0.021	472.899	4	0.027	472.899	5	0.031
473.349	1	0	473.349	2	0.008	473.349	3	0.02	473.349	4	0.026	473.349	5	0.03
473.798	1	0	473.798	2	0.008	473.798	3	0.02	473.798	4	0.026	473.798	5	0.03
474.247	1	0.001	474.247	2	0.008	474.247	3	0.02	474.247	4	0.026	474.247	5	0.031
474.696	1	0	474.696	2	0.007	474.696	3	0.02	474.696	4	0.025	474.696	5	0.03
475.146	1	0	475.146	2	0.007	475.146	3	0.019	475.146	4	0.025	475.146	5	0.029
475.595	1	-0.001	475.595	2	0.007	475.595	3	0.018	475.595	4	0.024	475.595	5	0.028
476.045	1	-0.002	476.045	2	0.006	476.045	3	0.017	476.045	4	0.024	476.045	5	0.027
476.494	1	-0.002	476.494	2	0.006	476.494	3	0.017	476.494	4	0.023	476.494	5	0.026
476.944	1	-0.002	476.944	2	0.006	476.944	3	0.016	476.944	4	0.022	476.944	5	0.026
477.393	1	-0.002	477.393	2	0.006	477.393	3	0.015	477.393	4	0.021	477.393	5	0.025
477.843	1	-0.002	477.843	2	0.006	477.843	3	0.015	477.843	4	0.021	477.843	5	0.025
478.292	1	-0.002	478.292	2	0.005	478.292	3	0.015	478.292	4	0.02	478.292	5	0.025
478.742	1	-0.001	478.742	2	0.005	478.742	3	0.014	478.742	4	0.02	478.742	5	0.025
479.192	1	-0.001	479.192	2	0.005	479.192	3	0.014	479.192	4	0.02	479.192	5	0.024
479.641	1	-0.001	479.641	2	0.006	479.641	3	0.013	479.641	4	0.02	479.641	5	0.023
480.091	1	0	480.091	2	0.005	480.091	3	0.013	480.091	4	0.019	480.091	5	0.023
480.541	1	0	480.541	2	0.005	480.541	3	0.014	480.541	4	0.019	480.541	5	0.023
480.991	1	0.001	480.991	2	0.005	480.991	3	0.014	480.991	4	0.019	480.991	5	0.024
481.441	1	0.001	481.441	2	0.005	481.441	3	0.014	481.441	4	0.019	481.441	5	0.024
481.891	1	0.001	481.891	2	0.005	481.891	3	0.014	481.891	4	0.019	481.891	5	0.024
482.341	1	0.001	482.341	2	0.005	482.341	3	0.014	482.341	4	0.019	482.341	5	0.024
482.791	1	0.001	482.791	2	0.004	482.791	3	0.013	482.791	4	0.019	482.791	5	0.024
483.241	1	0.001	483.241	2	0.005	483.241	3	0.013	483.241	4	0.019	483.241	5	0.024
483.691	1	0	483.691	2	0.004	483.691	3	0.013	483.691	4	0.018	483.691	5	0.024
484.141	1	0	484.141	2	0.004	484.141	3	0.012	484.141	4	0.018	484.141	5	0.024
484.591	1	0	484.591	2	0.004	484.591	3	0.012	484.591	4	0.018	484.591	5	0.024
485.041	1	-0.001	485.041	2	0.003	485.041	3	0.012	485.041	4	0.018	485.041	5	0.024
485.491	1	-0.001	485.491	2	0.003	485.491	3	0.011	485.491	4	0.018	485.491	5	0.023
485.942	1	-0.002	485.942	2	0.003	485.942	3	0.011	485.942	4	0.017	485.942	5	0.023
486.392	1	-0.001	486.392	2	0.003	486.392	3	0.01	486.392	4	0.017	486.392	5	0.022
486.842	1	-0.001	486.842	2	0.002	486.842	3	0.01	486.842	4	0.017	486.842	5	0.022
487.293	1	-0.001	487.293	2	0.002	487.293	3	0.01	487.293	4	0.016	487.293	5	0.022
487.743	1	-0.001	487.743	2	0.002	487.743	3	0.01	487.743	4	0.016	487.743	5	0.021
488.194	1	-0.001	488.194	2	0.002	488.194	3	0.009	488.194	4	0.015	488.194	5	0.02
488.644	1	-0.001	488.644	2	0.002	488.644	3	0.009	488.644	4	0.016	488.644	5	0.02
489.095	1	0	489.095	2	0.002	489.095	3	0.009	489.095	4	0.015	489.095	5	0.02
489.545	1	0	489.545	2	0.002	489.545	3	0.009	489.545	4	0.015	489.545	5	0.02
489.996	1	0	489.996	2	0.003	489.996	3	0.01	489.996	4	0.016	489.996	5	0.021
490.447	1	0.001	490.447	2	0.003	490.447	3	0.01	490.447	4	0.016	490.447	5	0.021
490.897	1	0.001	490.897	2	0.003	490.897	3	0.009	490.897	4	0.016	490.897	5	0.021
491.348	1	0.001	491.348	2	0.003	491.348	3	0.01	491.348	4	0.016	491.348	5	0.021
491.799	1	0.001	491.799	2	0.003	491.799	3	0.009	491.799	4	0.016	491.799	5	0.021
492.25	1	0.001	492.25	2	0.003	492.25	3	0.01	492.25	4	0.016	492.25	5	0.021
492.7	1	0	492.7	2	0.003	492.7	3	0.01	492.7	4	0.016	492.7	5	0.021
493.151	1	0	493.151	2	0.004	493.151	3	0.01	493.151	4	0.017	493.151	5	0.021
493.602	1	0	493.602	2	0.004	493.602	3	0.01	493.602	4	0.017	493.602	5	0.021
494.053	1	0	494.053	2	0.004	494.053	3	0.009	494.053	4	0.016	494.053	5	0.02
494.504	1	0	494.504	2	0.003	494.504	3	0.009	494.504	4	0.016	494.504	5	0.02
494.955	1	-0.001	494.955	2	0.003	494.955	3	0.009	494.955	4	0.015	494.955	5	0.019
495.406	1	-0.001	495.406	2	0.003	495.406	3	0.009	495.406	4	0.015	495.406	5	0.019
495.858	1	0	495.858	2	0.003	495.858	3	0.008	495.858	4	0.015	495.858	5	0.019
496.309	1	0	496.309	2	0.003	496.309	3	0.008	496.309	4	0.015	496.309	5	0.018
496.76	1	0	496.76	2	0.002	496.76	3	0.009	496.76	4	0.015	496.76	5	0.018
497.211	1	0	497.211	2	0.002	497.211	3	0.008	497.211	4	0.015	497.211	5	0.018
497.662	1	0.001	497.662	2	0.002	497.662	3	0.008	497.662	4	0.014	497.662	5	0.018
498.114	1	0.001	498.114	2	0.002	498.114	3	0.008	498.114	4	0.014	498.114	5	0.018
498.565	1	0.001	498.565	2	0.002	498.565	3	0.008	498.565	4	0.014	498.565	5	0.018
499.016	1	0.001	499.016	2	0.002	499.016	3	0.009	499.016	4	0.014	499.016	5	0.018
499.468	1	0.001	499.468	2	0.002	499.468	3	0.009	499.468	4	0.013	499.468	5	0.018
499.919	1	0.001	499.919	2	0.002	499.919	3	0.009	499.919	4	0.013	499.919	5	0.017
500.371	1	0	500.371	2	0.001	500.371	3	0.009	500.371	4	0.013	500.371	5	0.016
500.822	1	0	500.822	2	0.001	500.822	3	0.009	500.822	4	0.013	500.822	5	0.016
501.274	1	0	501.274	2	0.001	501.274	3	0.008	501.274	4	0.012	501.274	5	0.016
501.726	1	0	501.726	2	0.001	501.726	3	0.008	501.726	4	0.012	501.726	5	0.016
502.177	1	0	502.177	2	0.001	502.177	3	0.008	502.177	4	0.012	502.177	5	0.016
502.629	1	-0.001	502.629	2	0.001	502.629	3	0.007	502.629	4	0.012	502.629	5	0.016
503.081	1	0	503.081	2	0.001	503.081	3	0.007	503.081	4	0.011	503.081	5	0.016
503.532	1	-0.001	503.532	2	0	503.532	3	0.007	503.532	4	0.012	503.532	5	0.016
503.984	1	-0.001	503.984	2	0	503.984	3	0.006	503.984	4	0.012	503.984	5	0.016
504.436	1	-0.001	504.436	2	0.001	504.436	3	0.006	504.436	4	0.012	504.436	5	0.016
504.888	1	0	504.888	2	0.001	504.888	3	0.006	504.888	4	0.013	504.888	5	0.016
505.34	1	0	505.34	2	0.001	505.34	3	0.006	505.34	4	0.013	505.34	5	0.016
505.792	1	0	505.792	2	0.001	505.792	3	0.006	505.792	4	0.013	505.792	5	0.016
506.244	1	0	506.244	2	0.002	506.244	3	0.006	506.244	4	0.013	506.244	5	0.016
506.696	1	0	506.696	2	0.002	506.696	3	0.006	506.696	4	0.012	506.696	5	0.016
507.148	1	0	507.148	2	0.002	507.148	3	0.006	507.148	4	0.012	507.148	5	0.015
507.6	1	0	507.6	2	0.002	507.6	3	0.006	507.6	4	0.013	507.6	5	0.015
508.052	1	0	508.052	2	0.003	508.052	3	0.007	508.052	4	0.013	508.052	5	0.016
508.504	1	0	508.504	2	0.003	508.504	3	0.007	508.504	4	0.013	508.504	5	0.016
508.957	1	0.001	508.957	2	0.003	508.957	3	0.008	508.957	4	0.013	508.957	5	0.016
509.409	1	0.001	509.409	2	0.003	509.409	3	0.008	509.409	4	0.013	509.409	5	0.016
509.861	1	0.001	509.861	2	0.003	509.861	3	0.008	509.861	4	0.013	509.861	5	0.016
510.314	1	0.001	510.314	2	0.003	510.314	3	0.008	510.314	4	0.013	510.314	5	0.016
510.766	1	0.001	510.766	2	0.003	510.766	3	0.008	510.766	4	0.013	510.766	5	0.016
511.218	1	0.001	511.218	2	0.003	511.218	3	0.008	511.218	4	0.013	511.218	5	0.016
511.671	1	0.001	511.671	2	0.003	511.671	3	0.008	511.671	4	0.013	511.671	5	0.016
512.123	1	0.001	512.123	2	0.003	512.123	3	0.008	512.123	4	0.013	512.123	5	0.017
512.576	1	0.001	512.576	2	0.003	512.576	3	0.008	512.576	4	0.014	512.576	5	0.017
513.028	1	0.001	513.028	2	0.003	513.028	3	0.008	513.028	4	0.014	513.028	5	0.018
513.481	1	0.001	513.481	2	0.002	513.481	3	0.008	513.481	4	0.014	513.481	5	0.018
513.934	1	0.001	513.934	2	0.002	513.934	3	0.008	513.934	4	0.014	513.934	5	0.018
514.386	1	0.001	514.386	2	0.002	514.386	3	0.007	514.386	4	0.013	514.386	5	0.018
514.839	1	0.001	514.839	2	0.001	514.839	3	0.007	514.839	4	0.012	514.839	5	0.017
515.292	1	0.001	515.292	2	0.001	515.292	3	0.007	515.292	4	0.012	515.292	5	0.017
515.745	1	0	515.745	2	0.001	515.745	3	0.006	515.745	4	0.012	515.745	5	0.017
516.197	1	0	516.197	2	0.001	516.197	3	0.006	516.197	4	0.012	516.197	5	0.017
516.65	1	0	516.65	2	0.001	516.65	3	0.006	516.65	4	0.011	516.65	5	0.016
517.103	1	0	517.103	2	0.001	517.103	3	0.005	517.103	4	0.011	517.103	5	0.016
517.556	1	0	517.556	2	0	517.556	3	0.005	517.556	4	0.01	517.556	5	0.015
518.009	1	0	518.009	2	0.001	518.009	3	0.005	518.009	4	0.01	518.009	5	0.015
518.462	1	0	518.462	2	0	518.462	3	0.005	518.462	4	0.01	518.462	5	0.014
518.915	1	0	518.915	2	0	518.915	3	0.004	518.915	4	0.009	518.915	5	0.014
519.368	1	0	519.368	2	0.001	519.368	3	0.004	519.368	4	0.009	519.368	5	0.013
519.821	1	0	519.821	2	0.001	519.821	3	0.004	519.821	4	0.009	519.821	5	0.014
520.275	1	0	520.275	2	0.001	520.275	3	0.004	520.275	4	0.009	520.275	5	0.013
520.728	1	0	520.728	2	0.001	520.728	3	0.004	520.728	4	0.009	520.728	5	0.013
521.181	1	0.001	521.181	2	0.001	521.181	3	0.004	521.181	4	0.009	521.181	5	0.013
521.634	1	0.001	521.634	2	0.001	521.634	3	0.004	521.634	4	0.008	521.634	5	0.013
522.088	1	0	522.088	2	0.001	522.088	3	0.004	522.088	4	0.008	522.088	5	0.012
522.541	1	0	522.541	2	0.001	522.541	3	0.003	522.541	4	0.008	522.541	5	0.011
522.994	1	0	522.994	2	0	522.994	3	0.003	522.994	4	0.008	522.994	5	0.011
523.448	1	0	523.448	2	0	523.448	3	0.002	523.448	4	0.008	523.448	5	0.011
523.901	1	-0.001	523.901	2	-0.001	523.901	3	0.002	523.901	4	0.008	523.901	5	0.011
524.355	1	-0.001	524.355	2	0	524.355	3	0.002	524.355	4	0.008	524.355	5	0.011
524.808	1	-0.001	524.808	2	0	524.808	3	0.003	524.808	4	0.008	524.808	5	0.011
525.262	1	-0.001	525.262	2	0	525.262	3	0.003	525.262	4	0.008	525.262	5	0.011
525.716	1	0	525.716	2	0	525.716	3	0.003	525.716	4	0.009	525.716	5	0.011
526.169	1	-0.001	526.169	2	0	526.169	3	0.002	526.169	4	0.009	526.169	5	0.01
526.623	1	-0.001	526.623	2	0	526.623	3	0.002	526.623	4	0.008	526.623	5	0.01
527.077	1	0	527.077	2	0	527.077	3	0.003	527.077	4	0.008	527.077	5	0.011
527.531	1	0	527.531	2	0	527.531	3	0.003	527.531	4	0.009	527.531	5	0.011
527.984	1	0	527.984	2	0	527.984	3	0.004	527.984	4	0.009	527.984	5	0.011
528.438	1	0	528.438	2	0.001	528.438	3	0.004	528.438	4	0.009	528.438	5	0.011
528.892	1	0.001	528.892	2	0.001	528.892	3	0.004	528.892	4	0.009	528.892	5	0.012
529.346	1	0.001	529.346	2	0.002	529.346	3	0.005	529.346	4	0.009	529.346	5	0.012
529.8	1	0.001	529.8	2	0.002	529.8	3	0.005	529.8	4	0.009	529.8	5	0.012
530.254	1	0.002	530.254	2	0.002	530.254	3	0.005	530.254	4	0.009	530.254	5	0.012
530.708	1	0.002	530.708	2	0.002	530.708	3	0.005	530.708	4	0.009	530.708	5	0.013
531.162	1	0.002	531.162	2	0.003	531.162	3	0.005	531.162	4	0.01	531.162	5	0.013
531.616	1	0.002	531.616	2	0.003	531.616	3	0.005	531.616	4	0.01	531.616	5	0.013
532.07	1	0.002	532.07	2	0.002	532.07	3	0.005	532.07	4	0.01	532.07	5	0.013
532.525	1	0.002	532.525	2	0.003	532.525	3	0.005	532.525	4	0.01	532.525	5	0.014
532.979	1	0.002	532.979	2	0.003	532.979	3	0.005	532.979	4	0.01	532.979	5	0.015
533.433	1	0.002	533.433	2	0.003	533.433	3	0.006	533.433	4	0.011	533.433	5	0.015
533.887	1	0.001	533.887	2	0.003	533.887	3	0.006	533.887	4	0.011	533.887	5	0.015
534.342	1	0.001	534.342	2	0.002	534.342	3	0.005	534.342	4	0.011	534.342	5	0.015
534.796	1	0.001	534.796	2	0.001	534.796	3	0.005	534.796	4	0.011	534.796	5	0.015
535.25	1	0	535.25	2	0.001	535.25	3	0.004	535.25	4	0.01	535.25	5	0.015
535.705	1	0	535.705	2	0	535.705	3	0.004	535.705	4	0.01	535.705	5	0.015
536.159	1	0	536.159	2	0	536.159	3	0.004	536.159	4	0.01	536.159	5	0.014
536.614	1	0	536.614	2	-0.001	536.614	3	0.004	536.614	4	0.01	536.614	5	0.014
537.068	1	0	537.068	2	0	537.068	3	0.004	537.068	4	0.01	537.068	5	0.014
537.523	1	0	537.523	2	-0.001	537.523	3	0.003	537.523	4	0.01	537.523	5	0.014
537.978	1	0	537.978	2	0	537.978	3	0.003	537.978	4	0.01	537.978	5	0.014
538.432	1	0.001	538.432	2	0	538.432	3	0.003	538.432	4	0.01	538.432	5	0.014
538.887	1	0.001	538.887	2	0	538.887	3	0.003	538.887	4	0.01	538.887	5	0.014
539.342	1	0.001	539.342	2	0.001	539.342	3	0.004	539.342	4	0.011	539.342	5	0.014
539.797	1	0.001	539.797	2	0.001	539.797	3	0.004	539.797	4	0.011	539.797	5	0.014
540.251	1	0.001	540.251	2	0.001	540.251	3	0.004	540.251	4	0.011	540.251	5	0.014
540.706	1	0.001	540.706	2	0.002	540.706	3	0.004	540.706	4	0.011	540.706	5	0.015
541.161	1	0.002	541.161	2	0.002	541.161	3	0.005	541.161	4	0.011	541.161	5	0.015
541.616	1	0.001	541.616	2	0.002	541.616	3	0.005	541.616	4	0.011	541.616	5	0.015
542.071	1	0.001	542.071	2	0.002	542.071	3	0.005	542.071	4	0.011	542.071	5	0.015
542.526	1	0.001	542.526	2	0.001	542.526	3	0.005	542.526	4	0.011	542.526	5	0.015
542.981	1	0.001	542.981	2	0.001	542.981	3	0.004	542.981	4	0.011	542.981	5	0.015
543.436	1	0	543.436	2	0.001	543.436	3	0.004	543.436	4	0.01	543.436	5	0.014
543.891	1	0	543.891	2	0	543.891	3	0.004	543.891	4	0.01	543.891	5	0.014
544.347	1	-0.001	544.347	2	0	544.347	3	0.004	544.347	4	0.009	544.347	5	0.013
544.802	1	-0.001	544.802	2	0	544.802	3	0.004	544.802	4	0.008	544.802	5	0.013
545.257	1	-0.001	545.257	2	0	545.257	3	0.003	545.257	4	0.009	545.257	5	0.013
545.712	1	-0.001	545.712	2	-0.001	545.712	3	0.003	545.712	4	0.008	545.712	5	0.013
546.168	1	-0.001	546.168	2	-0.001	546.168	3	0.003	546.168	4	0.008	546.168	5	0.012
546.623	1	-0.001	546.623	2	-0.001	546.623	3	0.003	546.623	4	0.009	546.623	5	0.012
547.078	1	-0.001	547.078	2	-0.001	547.078	3	0.003	547.078	4	0.009	547.078	5	0.013
547.534	1	-0.001	547.534	2	-0.001	547.534	3	0.003	547.534	4	0.008	547.534	5	0.013
547.989	1	-0.001	547.989	2	-0.001	547.989	3	0.003	547.989	4	0.008	547.989	5	0.013
548.445	1	-0.001	548.445	2	-0.001	548.445	3	0.003	548.445	4	0.009	548.445	5	0.013
548.9	1	0	548.9	2	-0.001	548.9	3	0.003	548.9	4	0.009	548.9	5	0.013
549.356	1	0	549.356	2	-0.001	549.356	3	0.003	549.356	4	0.009	549.356	5	0.013
549.811	1	0	549.811	2	0	549.811	3	0.003	549.811	4	0.009	549.811	5	0.013
550.267	1	0	550.267	2	0	550.267	3	0.003	550.267	4	0.009	550.267	5	0.013
550.723	1	0	550.723	2	0	550.723	3	0.003	550.723	4	0.009	550.723	5	0.013
551.179	1	0.001	551.179	2	0.001	551.179	3	0.003	551.179	4	0.009	551.179	5	0.013
551.634	1	0	551.634	2	0.001	551.634	3	0.004	551.634	4	0.009	551.634	5	0.013
552.09	1	0.001	552.09	2	0.001	552.09	3	0.004	552.09	4	0.009	552.09	5	0.013
552.546	1	0.001	552.546	2	0.002	552.546	3	0.004	552.546	4	0.009	552.546	5	0.012
553.002	1	0.001	553.002	2	0.002	553.002	3	0.004	553.002	4	0.01	553.002	5	0.013
553.458	1	0.001	553.458	2	0.002	553.458	3	0.004	553.458	4	0.01	553.458	5	0.012
553.914	1	0.001	553.914	2	0.002	553.914	3	0.004	553.914	4	0.01	553.914	5	0.012
554.37	1	0.002	554.37	2	0.002	554.37	3	0.004	554.37	4	0.009	554.37	5	0.012
554.826	1	0.002	554.826	2	0.002	554.826	3	0.004	554.826	4	0.009	554.826	5	0.012
555.282	1	0.002	555.282	2	0.003	555.282	3	0.004	555.282	4	0.009	555.282	5	0.011
555.738	1	0.002	555.738	2	0.003	555.738	3	0.003	555.738	4	0.009	555.738	5	0.011
556.194	1	0.002	556.194	2	0.002	556.194	3	0.003	556.194	4	0.008	556.194	5	0.01
556.65	1	0.002	556.65	2	0.002	556.65	3	0.003	556.65	4	0.008	556.65	5	0.01
557.106	1	0.002	557.106	2	0.002	557.106	3	0.003	557.106	4	0.007	557.106	5	0.009
557.562	1	0.002	557.562	2	0.001	557.562	3	0.002	557.562	4	0.007	557.562	5	0.009
558.019	1	0.002	558.019	2	0.001	558.019	3	0.002	558.019	4	0.006	558.019	5	0.009
558.475	1	0.001	558.475	2	0.001	558.475	3	0.001	558.475	4	0.006	558.475	5	0.008
558.931	1	0.001	558.931	2	0	558.931	3	0.001	558.931	4	0.005	558.931	5	0.008
559.388	1	0	559.388	2	0	559.388	3	0.001	559.388	4	0.005	559.388	5	0.007
559.844	1	0	559.844	2	0	559.844	3	0	559.844	4	0.005	559.844	5	0.007
560.301	1	0	560.301	2	-0.001	560.301	3	0	560.301	4	0.005	560.301	5	0.007
560.757	1	-0.001	560.757	2	-0.001	560.757	3	0	560.757	4	0.004	560.757	5	0.006
561.214	1	-0.001	561.214	2	-0.001	561.214	3	0	561.214	4	0.004	561.214	5	0.006
561.67	1	-0.001	561.67	2	-0.001	561.67	3	0	561.67	4	0.004	561.67	5	0.006
562.127	1	-0.001	562.127	2	-0.001	562.127	3	0	562.127	4	0.004	562.127	5	0.005
562.584	1	-0.001	562.584	2	-0.001	562.584	3	0	562.584	4	0.004	562.584	5	0.005
563.04	1	0	563.04	2	0	563.04	3	0	563.04	4	0.004	563.04	5	0.005
563.497	1	0	563.497	2	0	563.497	3	0.001	563.497	4	0.003	563.497	5	0.005
563.954	1	0	563.954	2	0	563.954	3	0.001	563.954	4	0.003	563.954	5	0.005
564.411	1	0.001	564.411	2	0	564.411	3	0.001	564.411	4	0.003	564.411	5	0.005
564.867	1	0.001	564.867	2	0	564.867	3	0.001	564.867	4	0.003	564.867	5	0.004
565.324	1	0	565.324	2	0	565.324	3	0.002	565.324	4	0.003	565.324	5	0.004
565.781	1	0	565.781	2	0	565.781	3	0.002	565.781	4	0.003	565.781	5	0.005
566.238	1	0	566.238	2	0	566.238	3	0.002	566.238	4	0.003	566.238	5	0.005
566.695	1	0	566.695	2	0	566.695	3	0.002	566.695	4	0.002	566.695	5	0.005
567.152	1	0	567.152	2	0	567.152	3	0.002	567.152	4	0.003	567.152	5	0.005
567.609	1	0	567.609	2	0	567.609	3	0.002	567.609	4	0.003	567.609	5	0.004
568.066	1	0	568.066	2	0	568.066	3	0.002	568.066	4	0.003	568.066	5	0.004
568.523	1	0	568.523	2	0	568.523	3	0.002	568.523	4	0.003	568.523	5	0.004
568.981	1	0	568.981	2	0	568.981	3	0.002	568.981	4	0.002	568.981	5	0.003
569.438	1	0	569.438	2	0	569.438	3	0.001	569.438	4	0.002	569.438	5	0.002
569.895	1	0	569.895	2	0	569.895	3	0	569.895	4	0.001	569.895	5	0.002
570.352	1	0	570.352	2	0	570.352	3	0	570.352	4	0.001	570.352	5	0.001
570.81	1	0	570.81	2	-0.001	570.81	3	0	570.81	4	0	570.81	5	0.001
571.267	1	0	571.267	2	-0.001	571.267	3	-0.001	571.267	4	0	571.267	5	0
571.724	1	0	571.724	2	-0.001	571.724	3	-0.001	571.724	4	0	571.724	5	0
572.182	1	0	572.182	2	-0.001	572.182	3	-0.001	572.182	4	0	572.182	5	-0.001
572.639	1	0	572.639	2	-0.001	572.639	3	-0.001	572.639	4	-0.001	572.639	5	-0.001
573.097	1	0	573.097	2	-0.001	573.097	3	-0.001	573.097	4	-0.001	573.097	5	-0.001
573.554	1	0	573.554	2	-0.001	573.554	3	-0.001	573.554	4	-0.001	573.554	5	-0.001
574.012	1	0	574.012	2	0	574.012	3	-0.001	574.012	4	-0.001	574.012	5	-0.001
574.469	1	0	574.469	2	0	574.469	3	-0.001	574.469	4	-0.001	574.469	5	-0.001
574.927	1	0.001	574.927	2	0.001	574.927	3	-0.001	574.927	4	0	574.927	5	0
575.385	1	0.001	575.385	2	0.001	575.385	3	0	575.385	4	0	575.385	5	0
575.842	1	0.001	575.842	2	0.001	575.842	3	0	575.842	4	0	575.842	5	0
576.3	1	0.002	576.3	2	0.002	576.3	3	0	576.3	4	0	576.3	5	0
576.758	1	0.002	576.758	2	0.002	576.758	3	0	576.758	4	0	576.758	5	0
577.216	1	0.002	577.216	2	0.002	577.216	3	0	577.216	4	0	577.216	5	0
577.674	1	0.002	577.674	2	0.002	577.674	3	0	577.674	4	0	577.674	5	0
578.131	1	0.002	578.131	2	0.002	578.131	3	0	578.131	4	0	578.131	5	0
578.589	1	0.002	578.589	2	0.002	578.589	3	0	578.589	4	0	578.589	5	0.001
579.047	1	0.001	579.047	2	0.001	579.047	3	0	579.047	4	-0.001	579.047	5	0.001
579.505	1	0.001	579.505	2	0.001	579.505	3	0	579.505	4	0	579.505	5	0
579.963	1	0.001	579.963	2	0.001	579.963	3	0	579.963	4	0	579.963	5	0
580.421	1	0	580.421	2	0	580.421	3	0	580.421	4	0	580.421	5	0
580.88	1	0	580.88	2	0	580.88	3	-0.001	580.88	4	-0.001	580.88	5	-0.001
581.338	1	0	581.338	2	-0.001	581.338	3	-0.001	581.338	4	-0.001	581.338	5	-0.001
581.796	1	0	581.796	2	-0.001	581.796	3	-0.001	581.796	4	-0.001	581.796	5	-0.001
582.254	1	0	582.254	2	-0.001	582.254	3	-0.001	582.254	4	-0.001	582.254	5	-0.001
582.712	1	-0.001	582.712	2	-0.001	582.712	3	-0.001	582.712	4	-0.001	582.712	5	-0.001
583.171	1	-0.001	583.171	2	-0.001	583.171	3	-0.001	583.171	4	-0.001	583.171	5	-0.001
583.629	1	-0.001	583.629	2	-0.001	583.629	3	-0.001	583.629	4	-0.001	583.629	5	-0.001
584.087	1	-0.001	584.087	2	-0.001	584.087	3	-0.002	584.087	4	-0.001	584.087	5	-0.002
584.546	1	-0.001	584.546	2	-0.001	584.546	3	-0.001	584.546	4	-0.001	584.546	5	-0.002
585.004	1	-0.001	585.004	2	-0.001	585.004	3	-0.001	585.004	4	-0.002	585.004	5	-0.001
585.463	1	0	585.463	2	0	585.463	3	-0.001	585.463	4	-0.001	585.463	5	-0.001
585.921	1	0	585.921	2	0	585.921	3	-0.001	585.921	4	-0.001	585.921	5	-0.001
586.38	1	0	586.38	2	0	586.38	3	0	586.38	4	-0.001	586.38	5	-0.001
586.838	1	0	586.838	2	0.001	586.838	3	0	586.838	4	0	586.838	5	0
587.297	1	0	587.297	2	0	587.297	3	0	587.297	4	0	587.297	5	0
587.756	1	0	587.756	2	0	587.756	3	0	587.756	4	-0.001	587.756	5	0
588.214	1	0.001	588.214	2	0	588.214	3	0	588.214	4	0	588.214	5	0
588.673	1	0.001	588.673	2	0.001	588.673	3	0.001	588.673	4	0	588.673	5	0
589.132	1	0.002	589.132	2	0.001	589.132	3	0.001	589.132	4	0.001	589.132	5	0
589.591	1	0.002	589.591	2	0.001	589.591	3	0.001	589.591	4	0.001	589.591	5	0.001
590.049	1	0.002	590.049	2	0.002	590.049	3	0.001	590.049	4	0.002	590.049	5	0.001
590.508	1	0.002	590.508	2	0.002	590.508	3	0.002	590.508	4	0.002	590.508	5	0.001
590.967	1	0.002	590.967	2	0.002	590.967	3	0.002	590.967	4	0.002	590.967	5	0.001
591.426	1	0.003	591.426	2	0.002	591.426	3	0.002	591.426	4	0.002	591.426	5	0.001
591.885	1	0.003	591.885	2	0.003	591.885	3	0.002	591.885	4	0.002	591.885	5	0.001
592.344	1	0.003	592.344	2	0.003	592.344	3	0.002	592.344	4	0.002	592.344	5	0.001
592.803	1	0.003	592.803	2	0.003	592.803	3	0.002	592.803	4	0.002	592.803	5	0.001
593.262	1	0.003	593.262	2	0.002	593.262	3	0.002	593.262	4	0.001	593.262	5	0.001
593.722	1	0.002	593.722	2	0.002	593.722	3	0.001	593.722	4	0.001	593.722	5	0.001
594.181	1	0.002	594.181	2	0.002	594.181	3	0.001	594.181	4	0	594.181	5	0.001
594.64	1	0.002	594.64	2	0.002	594.64	3	0.001	594.64	4	0	594.64	5	0.001
595.099	1	0.002	595.099	2	0.002	595.099	3	0.001	595.099	4	0	595.099	5	0.001
595.558	1	0.002	595.558	2	0.001	595.558	3	0.001	595.558	4	0	595.558	5	0
596.018	1	0.002	596.018	2	0.001	596.018	3	0.001	596.018	4	0	596.018	5	0
596.477	1	0.002	596.477	2	0.001	596.477	3	0	596.477	4	0	596.477	5	0
596.937	1	0.001	596.937	2	0.001	596.937	3	0	596.937	4	0	596.937	5	0
597.396	1	0.001	597.396	2	0	597.396	3	0	597.396	4	-0.001	597.396	5	0
597.855	1	0.001	597.855	2	0	597.855	3	0	597.855	4	-0.001	597.855	5	0
598.315	1	0.001	598.315	2	0	598.315	3	0	598.315	4	0	598.315	5	0
598.774	1	0.001	598.774	2	0.001	598.774	3	0	598.774	4	0	598.774	5	0
599.234	1	0.001	599.234	2	0.001	599.234	3	0	599.234	4	0	599.234	5	0
599.694	1	0.001	599.694	2	0.001	599.694	3	0	599.694	4	0	599.694	5	0
600.153	1	0.001	600.153	2	0.001	600.153	3	0	600.153	4	0	600.153	5	0
600.613	1	0.001	600.613	2	0.001	600.613	3	0	600.613	4	0	600.613	5	0
601.073	1	0.001	601.073	2	0.001	601.073	3	0	601.073	4	0	601.073	5	0
601.532	1	0.001	601.532	2	0	601.532	3	0	601.532	4	0	601.532	5	0
601.992	1	0.001	601.992	2	0	601.992	3	0	601.992	4	0	601.992	5	0
602.452	1	0.001	602.452	2	0.001	602.452	3	0	602.452	4	0	602.452	5	-0.001
602.912	1	0	602.912	2	0	602.912	3	0	602.912	4	0	602.912	5	-0.001
603.372	1	0	603.372	2	0	603.372	3	-0.001	603.372	4	0	603.372	5	-0.001
603.832	1	0	603.832	2	-0.001	603.832	3	-0.001	603.832	4	-0.001	603.832	5	-0.001
604.292	1	-0.001	604.292	2	-0.001	604.292	3	-0.001	604.292	4	-0.001	604.292	5	-0.001
604.752	1	-0.001	604.752	2	-0.001	604.752	3	-0.001	604.752	4	-0.001	604.752	5	-0.002
605.212	1	-0.001	605.212	2	-0.002	605.212	3	-0.001	605.212	4	-0.002	605.212	5	-0.002
605.672	1	-0.001	605.672	2	-0.002	605.672	3	-0.001	605.672	4	-0.002	605.672	5	-0.002
606.132	1	-0.001	606.132	2	-0.001	606.132	3	-0.001	606.132	4	-0.002	606.132	5	-0.002
606.592	1	0	606.592	2	-0.001	606.592	3	-0.001	606.592	4	-0.002	606.592	5	-0.001
607.052	1	0	607.052	2	0	607.052	3	-0.001	607.052	4	-0.001	607.052	5	-0.001
607.512	1	0.001	607.512	2	0	607.512	3	-0.001	607.512	4	-0.001	607.512	5	-0.001
607.973	1	0.002	607.973	2	0	607.973	3	0	607.973	4	0	607.973	5	0
608.433	1	0.002	608.433	2	0.001	608.433	3	0	608.433	4	0	608.433	5	0
608.893	1	0.003	608.893	2	0.001	608.893	3	0	608.893	4	0.001	608.893	5	0
609.354	1	0.003	609.354	2	0.002	609.354	3	0.001	609.354	4	0.001	609.354	5	0.001
609.814	1	0.003	609.814	2	0.002	609.814	3	0.001	609.814	4	0.001	609.814	5	0.001
610.274	1	0.003	610.274	2	0.002	610.274	3	0.001	610.274	4	0.001	610.274	5	0.001
610.735	1	0.003	610.735	2	0.002	610.735	3	0.001	610.735	4	0.001	610.735	5	0.001
611.195	1	0.003	611.195	2	0.002	611.195	3	0.001	611.195	4	0.001	611.195	5	0.001
611.656	1	0.003	611.656	2	0.002	611.656	3	0.001	611.656	4	0.001	611.656	5	0.001
612.116	1	0.003	612.116	2	0.002	612.116	3	0.002	612.116	4	0.001	612.116	5	0.001
612.577	1	0.004	612.577	2	0.003	612.577	3	0.002	612.577	4	0.002	612.577	5	0.002
613.038	1	0.004	613.038	2	0.003	613.038	3	0.002	613.038	4	0.002	613.038	5	0.002
613.498	1	0.004	613.498	2	0.003	613.498	3	0.003	613.498	4	0.002	613.498	5	0.002
613.959	1	0.004	613.959	2	0.003	613.959	3	0.003	613.959	4	0.002	613.959	5	0.002
614.42	1	0.004	614.42	2	0.003	614.42	3	0.002	614.42	4	0.001	614.42	5	0.002
614.881	1	0.004	614.881	2	0.003	614.881	3	0.002	614.881	4	0.001	614.881	5	0.001
615.341	1	0.004	615.341	2	0.003	615.341	3	0.002	615.341	4	0.002	615.341	5	0.002
615.802	1	0.004	615.802	2	0.003	615.802	3	0.002	615.802	4	0.002	615.802	5	0.002
616.263	1	0.004	616.263	2	0.003	616.263	3	0.001	616.263	4	0.001	616.263	5	0.001
616.724	1	0.004	616.724	2	0.003	616.724	3	0.001	616.724	4	0.001	616.724	5	0.001
617.185	1	0.003	617.185	2	0.002	617.185	3	0	617.185	4	0.001	617.185	5	0
617.646	1	0.003	617.646	2	0.002	617.646	3	0	617.646	4	0	617.646	5	0
618.107	1	0.003	618.107	2	0.002	618.107	3	0	618.107	4	0	618.107	5	0
618.568	1	0.003	618.568	2	0.003	618.568	3	0	618.568	4	0	618.568	5	0
619.029	1	0.004	619.029	2	0.003	619.029	3	0	619.029	4	0	619.029	5	0
619.491	1	0.004	619.491	2	0.003	619.491	3	0.001	619.491	4	0.001	619.491	5	0.001
619.952	1	0.004	619.952	2	0.003	619.952	3	0.001	619.952	4	0.001	619.952	5	0.001
620.413	1	0.004	620.413	2	0.003	620.413	3	0.002	620.413	4	0.001	620.413	5	0
620.874	1	0.004	620.874	2	0.003	620.874	3	0.002	620.874	4	0.001	620.874	5	0
621.335	1	0.003	621.335	2	0.003	621.335	3	0.001	621.335	4	0.001	621.335	5	0
621.797	1	0.003	621.797	2	0.002	621.797	3	0.001	621.797	4	0.001	621.797	5	0.001
622.258	1	0.003	622.258	2	0.001	622.258	3	0.001	622.258	4	0	622.258	5	0
622.72	1	0.003	622.72	2	0.001	622.72	3	0.001	622.72	4	0	622.72	5	0
623.181	1	0.002	623.181	2	0.001	623.181	3	0.001	623.181	4	0	623.181	5	0
623.642	1	0.002	623.642	2	0.001	623.642	3	0.001	623.642	4	0	623.642	5	0
624.104	1	0.002	624.104	2	0.001	624.104	3	0	624.104	4	0	624.104	5	0
624.565	1	0.002	624.565	2	0.001	624.565	3	0	624.565	4	0	624.565	5	0
625.027	1	0.002	625.027	2	0	625.027	3	0	625.027	4	0	625.027	5	0
625.489	1	0.003	625.489	2	0.001	625.489	3	0	625.489	4	0	625.489	5	0.001
625.95	1	0.003	625.95	2	0.001	625.95	3	0	625.95	4	0.001	625.95	5	0.001
626.412	1	0.003	626.412	2	0.001	626.412	3	0	626.412	4	0.001	626.412	5	0.001
626.874	1	0.003	626.874	2	0.001	626.874	3	0	626.874	4	0.001	626.874	5	0.001
627.335	1	0.003	627.335	2	0.002	627.335	3	0	627.335	4	0.001	627.335	5	0.001
627.797	1	0.004	627.797	2	0.002	627.797	3	0.001	627.797	4	0.001	627.797	5	0.001
628.259	1	0.004	628.259	2	0.002	628.259	3	0.001	628.259	4	0.001	628.259	5	0.001
628.721	1	0.004	628.721	2	0.002	628.721	3	0.001	628.721	4	0.001	628.721	5	0.001
629.183	1	0.003	629.183	2	0.002	629.183	3	0.001	629.183	4	0.001	629.183	5	0.001
629.645	1	0.003	629.645	2	0.002	629.645	3	0.001	629.645	4	0.001	629.645	5	0
630.107	1	0.003	630.107	2	0.002	630.107	3	0.001	630.107	4	0.001	630.107	5	0
630.569	1	0.003	630.569	2	0.002	630.569	3	0.001	630.569	4	0	630.569	5	0
631.031	1	0.003	631.031	2	0.002	631.031	3	0.001	631.031	4	0	631.031	5	0
631.493	1	0.003	631.493	2	0.002	631.493	3	0.001	631.493	4	0	631.493	5	0
631.955	1	0.003	631.955	2	0.002	631.955	3	0.001	631.955	4	0	631.955	5	0
632.417	1	0.002	632.417	2	0.002	632.417	3	0	632.417	4	0	632.417	5	0
632.879	1	0.002	632.879	2	0.002	632.879	3	0	632.879	4	0	632.879	5	0
633.341	1	0.001	633.341	2	0.001	633.341	3	0	633.341	4	0	633.341	5	-0.001
633.804	1	0.001	633.804	2	0.001	633.804	3	-0.001	633.804	4	-0.001	633.804	5	-0.001
634.266	1	0.001	634.266	2	0	634.266	3	-0.001	634.266	4	-0.001	634.266	5	-0.001
634.728	1	0	634.728	2	0	634.728	3	-0.001	634.728	4	-0.001	634.728	5	-0.001
635.191	1	0	635.191	2	0	635.191	3	-0.001	635.191	4	-0.001	635.191	5	-0.001
635.653	1	0	635.653	2	0	635.653	3	-0.001	635.653	4	-0.001	635.653	5	-0.001
636.115	1	0	636.115	2	0	636.115	3	-0.001	636.115	4	-0.001	636.115	5	-0.001
636.578	1	0	636.578	2	0	636.578	3	-0.001	636.578	4	-0.001	636.578	5	-0.001
637.04	1	0	637.04	2	-0.001	637.04	3	-0.001	637.04	4	-0.001	637.04	5	-0.001
637.503	1	0	637.503	2	0	637.503	3	0	637.503	4	-0.001	637.503	5	-0.001
637.966	1	0.001	637.966	2	0	637.966	3	0.001	637.966	4	0	637.966	5	0
638.428	1	0.002	638.428	2	0.001	638.428	3	0.001	638.428	4	0.001	638.428	5	0.001
638.891	1	0.002	638.891	2	0.001	638.891	3	0.002	638.891	4	0.001	638.891	5	0.002
639.353	1	0.003	639.353	2	0.002	639.353	3	0.003	639.353	4	0.002	639.353	5	0.002
639.816	1	0.003	639.816	2	0.002	639.816	3	0.003	639.816	4	0.003	639.816	5	0.003
640.279	1	0.003	640.279	2	0.002	640.279	3	0.004	640.279	4	0.003	640.279	5	0.003
640.742	1	0.003	640.742	2	0.002	640.742	3	0.004	640.742	4	0.003	640.742	5	0.002
641.205	1	0.002	641.205	2	0.002	641.205	3	0.003	641.205	4	0.002	641.205	5	0.002
641.667	1	0.002	641.667	2	0.001	641.667	3	0.003	641.667	4	0.002	641.667	5	0.002
642.13	1	0.002	642.13	2	0.001	642.13	3	0.002	642.13	4	0.002	642.13	5	0.002
642.593	1	0.001	642.593	2	0.001	642.593	3	0.001	642.593	4	0.002	642.593	5	0.001
643.056	1	0	643.056	2	0	643.056	3	0.001	643.056	4	0.001	643.056	5	0.001
643.519	1	0	643.519	2	-0.001	643.519	3	0	643.519	4	0.001	643.519	5	0.001
643.982	1	-0.001	643.982	2	-0.001	643.982	3	0	643.982	4	0	643.982	5	0
644.445	1	-0.001	644.445	2	-0.001	644.445	3	0	644.445	4	0	644.445	5	0
644.908	1	-0.001	644.908	2	-0.001	644.908	3	-0.001	644.908	4	0	644.908	5	-0.001
645.371	1	-0.001	645.371	2	-0.002	645.371	3	-0.001	645.371	4	-0.001	645.371	5	-0.001
645.835	1	-0.001	645.835	2	-0.001	645.835	3	-0.001	645.835	4	-0.001	645.835	5	-0.001
646.298	1	-0.001	646.298	2	-0.001	646.298	3	-0.001	646.298	4	-0.001	646.298	5	0
646.761	1	0	646.761	2	-0.001	646.761	3	0	646.761	4	-0.001	646.761	5	-0.001
647.224	1	0	647.224	2	0	647.224	3	0	647.224	4	-0.001	647.224	5	-0.001
647.688	1	0.001	647.688	2	0.001	647.688	3	0	647.688	4	-0.001	647.688	5	0
648.151	1	0.002	648.151	2	0.002	648.151	3	0	648.151	4	-0.001	648.151	5	0
648.614	1	0.002	648.614	2	0.002	648.614	3	0	648.614	4	0	648.614	5	0
649.078	1	0.003	649.078	2	0.003	649.078	3	0	649.078	4	0	649.078	5	0
649.541	1	0.004	649.541	2	0.003	649.541	3	0.001	649.541	4	0	649.541	5	0
650.005	1	0.004	650.005	2	0.003	650.005	3	0.001	650.005	4	0	650.005	5	0
650.468	1	0.004	650.468	2	0.003	650.468	3	0.001	650.468	4	0	650.468	5	0
650.932	1	0.005	650.932	2	0.004	650.932	3	0.001	650.932	4	0	650.932	5	0
651.395	1	0.005	651.395	2	0.004	651.395	3	0.001	651.395	4	0	651.395	5	0
651.859	1	0.006	651.859	2	0.004	651.859	3	0.001	651.859	4	0.001	651.859	5	0
652.323	1	0.006	652.323	2	0.004	652.323	3	0.001	652.323	4	0.001	652.323	5	0
652.786	1	0.006	652.786	2	0.004	652.786	3	0.001	652.786	4	0.001	652.786	5	0
653.25	1	0.006	653.25	2	0.004	653.25	3	0.001	653.25	4	0.001	653.25	5	0
653.714	1	0.005	653.714	2	0.004	653.714	3	0.002	653.714	4	0.001	653.714	5	0
654.178	1	0.005	654.178	2	0.004	654.178	3	0.002	654.178	4	0.001	654.178	5	0.001
654.641	1	0.005	654.641	2	0.003	654.641	3	0.001	654.641	4	0.001	654.641	5	0.001
655.105	1	0.004	655.105	2	0.003	655.105	3	0.001	655.105	4	0.001	655.105	5	0.001
655.569	1	0.004	655.569	2	0.003	655.569	3	0.001	655.569	4	0.001	655.569	5	0.001
656.033	1	0.003	656.033	2	0.003	656.033	3	0.001	656.033	4	0.002	656.033	5	0.001
656.497	1	0.003	656.497	2	0.003	656.497	3	0.001	656.497	4	0.001	656.497	5	0.001
656.961	1	0.003	656.961	2	0.002	656.961	3	0	656.961	4	0.001	656.961	5	0.001
657.425	1	0.003	657.425	2	0.002	657.425	3	0	657.425	4	0.001	657.425	5	0.001
657.889	1	0.002	657.889	2	0.002	657.889	3	0	657.889	4	0.001	657.889	5	0.002
658.353	1	0.002	658.353	2	0.002	658.353	3	0	658.353	4	0.001	658.353	5	0.001
658.817	1	0.002	658.817	2	0.002	658.817	3	0	658.817	4	0.001	658.817	5	0.001
659.282	1	0.002	659.282	2	0.002	659.282	3	0	659.282	4	0.001	659.282	5	0.001
659.746	1	0.002	659.746	2	0.002	659.746	3	0.001	659.746	4	0.001	659.746	5	0.001
660.21	1	0.003	660.21	2	0.002	660.21	3	0.001	660.21	4	0.001	660.21	5	0.002
660.674	1	0.003	660.674	2	0.003	660.674	3	0.002	660.674	4	0.002	660.674	5	0.002
661.139	1	0.004	661.139	2	0.003	661.139	3	0.002	661.139	4	0.002	661.139	5	0.003
661.603	1	0.004	661.603	2	0.004	661.603	3	0.002	661.603	4	0.002	661.603	5	0.003
662.067	1	0.004	662.067	2	0.004	662.067	3	0.002	662.067	4	0.002	662.067	5	0.003
662.532	1	0.004	662.532	2	0.003	662.532	3	0.002	662.532	4	0.002	662.532	5	0.003
662.996	1	0.004	662.996	2	0.003	662.996	3	0.002	662.996	4	0.002	662.996	5	0.002
663.461	1	0.003	663.461	2	0.002	663.461	3	0.001	663.461	4	0.001	663.461	5	0.002
663.925	1	0.003	663.925	2	0.002	663.925	3	0.001	663.925	4	0.001	663.925	5	0.001
664.39	1	0.002	664.39	2	0.002	664.39	3	0	664.39	4	0	664.39	5	0.001
664.855	1	0.002	664.855	2	0.001	664.855	3	0	664.855	4	0	664.855	5	0
665.319	1	0.001	665.319	2	0.001	665.319	3	0	665.319	4	0	665.319	5	0
665.784	1	0.001	665.784	2	0	665.784	3	0	665.784	4	-0.001	665.784	5	0
666.249	1	0	666.249	2	0	666.249	3	-0.001	666.249	4	-0.001	666.249	5	-0.001
666.713	1	0	666.713	2	0	666.713	3	0	666.713	4	-0.001	666.713	5	-0.001
667.178	1	0	667.178	2	0	667.178	3	0	667.178	4	-0.001	667.178	5	-0.001
667.643	1	0	667.643	2	0	667.643	3	0	667.643	4	0	667.643	5	0
668.108	1	0	668.108	2	0	668.108	3	0	668.108	4	0	668.108	5	0
668.573	1	0	668.573	2	0	668.573	3	0	668.573	4	0	668.573	5	0
669.037	1	0	669.037	2	0	669.037	3	0.001	669.037	4	0.001	669.037	5	0.001
669.502	1	0	669.502	2	0	669.502	3	0.001	669.502	4	0.001	669.502	5	0.001
669.967	1	0	669.967	2	0	669.967	3	0.001	669.967	4	0.002	669.967	5	0.002
670.432	1	0	670.432	2	0	670.432	3	0.002	670.432	4	0.002	670.432	5	0.002
670.897	1	0.001	670.897	2	0	670.897	3	0.002	670.897	4	0.002	670.897	5	0.003
671.363	1	0	671.363	2	0	671.363	3	0.002	671.363	4	0.002	671.363	5	0.002
671.828	1	0	671.828	2	0	671.828	3	0.002	671.828	4	0.003	671.828	5	0.003
672.293	1	0	672.293	2	0	672.293	3	0.002	672.293	4	0.003	672.293	5	0.003
672.758	1	0	672.758	2	0	672.758	3	0.002	672.758	4	0.003	672.758	5	0.003
673.223	1	0.001	673.223	2	0.001	673.223	3	0.002	673.223	4	0.003	673.223	5	0.003
673.688	1	0.001	673.688	2	0.001	673.688	3	0.003	673.688	4	0.003	673.688	5	0.004
674.154	1	0.001	674.154	2	0.001	674.154	3	0.003	674.154	4	0.003	674.154	5	0.004
674.619	1	0.001	674.619	2	0.001	674.619	3	0.003	674.619	4	0.003	674.619	5	0.003
675.084	1	0.001	675.084	2	0.001	675.084	3	0.003	675.084	4	0.003	675.084	5	0.003
675.55	1	0.001	675.55	2	0.001	675.55	3	0.002	675.55	4	0.002	675.55	5	0.003
676.015	1	0.001	676.015	2	0.001	676.015	3	0.002	676.015	4	0.002	676.015	5	0.002
676.481	1	0.001	676.481	2	0	676.481	3	0.001	676.481	4	0.001	676.481	5	0.001
676.946	1	0	676.946	2	0	676.946	3	0.001	676.946	4	0.001	676.946	5	0.001
677.412	1	0	677.412	2	0	677.412	3	0	677.412	4	0	677.412	5	0
677.877	1	0	677.877	2	0	677.877	3	0	677.877	4	0	677.877	5	-0.001
678.343	1	0	678.343	2	-0.001	678.343	3	-0.001	678.343	4	-0.001	678.343	5	-0.001
678.809	1	-0.001	678.809	2	-0.001	678.809	3	-0.001	678.809	4	-0.001	678.809	5	-0.002
679.274	1	-0.001	679.274	2	-0.001	679.274	3	-0.001	679.274	4	-0.001	679.274	5	-0.002
679.74	1	0	679.74	2	0	679.74	3	-0.001	679.74	4	-0.001	679.74	5	-0.001
680.206	1	0	680.206	2	0	680.206	3	-0.001	680.206	4	-0.001	680.206	5	-0.001
680.672	1	0.001	680.672	2	0.001	680.672	3	0	680.672	4	0	680.672	5	0
681.137	1	0.002	681.137	2	0.002	681.137	3	0.001	681.137	4	0.001	681.137	5	0.002
681.603	1	0.003	681.603	2	0.003	681.603	3	0.002	681.603	4	0.002	681.603	5	0.003
682.069	1	0.004	682.069	2	0.004	682.069	3	0.003	682.069	4	0.003	682.069	5	0.004
682.535	1	0.005	682.535	2	0.005	682.535	3	0.004	682.535	4	0.004	682.535	5	0.005
683.001	1	0.006	683.001	2	0.006	683.001	3	0.004	683.001	4	0.004	683.001	5	0.006
683.467	1	0.007	683.467	2	0.006	683.467	3	0.005	683.467	4	0.005	683.467	5	0.006
683.933	1	0.007	683.933	2	0.007	683.933	3	0.005	683.933	4	0.005	683.933	5	0.006
684.399	1	0.007	684.399	2	0.007	684.399	3	0.005	684.399	4	0.005	684.399	5	0.006
684.865	1	0.007	684.865	2	0.006	684.865	3	0.005	684.865	4	0.005	684.865	5	0.006
685.331	1	0.006	685.331	2	0.006	685.331	3	0.004	685.331	4	0.004	685.331	5	0.005
685.797	1	0.006	685.797	2	0.005	685.797	3	0.004	685.797	4	0.004	685.797	5	0.005
686.263	1	0.005	686.263	2	0.005	686.263	3	0.003	686.263	4	0.003	686.263	5	0.004
686.73	1	0.005	686.73	2	0.004	686.73	3	0.003	686.73	4	0.003	686.73	5	0.004
687.196	1	0.005	687.196	2	0.004	687.196	3	0.003	687.196	4	0.003	687.196	5	0.003
687.662	1	0.004	687.662	2	0.004	687.662	3	0.003	687.662	4	0.002	687.662	5	0.003
688.129	1	0.004	688.129	2	0.003	688.129	3	0.002	688.129	4	0.002	688.129	5	0.002
688.595	1	0.003	688.595	2	0.003	688.595	3	0.002	688.595	4	0.002	688.595	5	0.002
689.061	1	0.003	689.061	2	0.003	689.061	3	0.002	689.061	4	0.002	689.061	5	0.002
689.528	1	0.003	689.528	2	0.003	689.528	3	0.002	689.528	4	0.002	689.528	5	0.002
689.994	1	0.003	689.994	2	0.003	689.994	3	0.003	689.994	4	0.002	689.994	5	0.003
690.461	1	0.003	690.461	2	0.003	690.461	3	0.003	690.461	4	0.002	690.461	5	0.003
690.927	1	0.003	690.927	2	0.002	690.927	3	0.003	690.927	4	0.002	690.927	5	0.003
691.394	1	0.002	691.394	2	0.002	691.394	3	0.002	691.394	4	0.002	691.394	5	0.003
691.86	1	0.002	691.86	2	0.002	691.86	3	0.002	691.86	4	0.002	691.86	5	0.003
692.327	1	0.002	692.327	2	0.002	692.327	3	0.002	692.327	4	0.002	692.327	5	0.002
692.794	1	0.002	692.794	2	0.002	692.794	3	0.002	692.794	4	0.001	692.794	5	0.002
693.26	1	0.001	693.26	2	0.002	693.26	3	0.002	693.26	4	0.001	693.26	5	0.002
693.727	1	0.001	693.727	2	0.001	693.727	3	0.002	693.727	4	0.001	693.727	5	0.002
694.194	1	0.001	694.194	2	0.001	694.194	3	0.002	694.194	4	0.001	694.194	5	0.002
694.661	1	0	694.661	2	0.001	694.661	3	0.002	694.661	4	0.001	694.661	5	0.002
695.128	1	0	695.128	2	0.001	695.128	3	0.002	695.128	4	0.001	695.128	5	0.002
695.594	1	0	695.594	2	0.001	695.594	3	0.002	695.594	4	0.001	695.594	5	0.002
696.061	1	0.001	696.061	2	0.002	696.061	3	0.002	696.061	4	0.002	696.061	5	0.002
696.528	1	0.001	696.528	2	0.002	696.528	3	0.003	696.528	4	0.002	696.528	5	0.001
696.995	1	0.001	696.995	2	0.001	696.995	3	0.002	696.995	4	0.001	696.995	5	0.002
697.462	1	0.001	697.462	2	0.001	697.462	3	0.002	697.462	4	0.001	697.462	5	0.001
697.929	1	0.001	697.929	2	0.001	697.929	3	0.002	697.929	4	0.001	697.929	5	0.001
698.396	1	0.001	698.396	2	0.001	698.396	3	0.002	698.396	4	0.001	698.396	5	0.001
698.863	1	0.002	698.863	2	0.002	698.863	3	0.002	698.863	4	0.001	698.863	5	0.001
699.331	1	0.002	699.331	2	0.002	699.331	3	0.002	699.331	4	0.001	699.331	5	0.001
699.798	1	0.003	699.798	2	0.003	699.798	3	0.002	699.798	4	0.001	699.798	5	0.002
700.265	1	0.003	700.265	2	0.003	700.265	3	0.002	700.265	4	0.001	700.265	5	0.002
700.732	1	0.004	700.732	2	0.003	700.732	3	0.002	700.732	4	0.001	700.732	5	0.002
701.2	1	0.004	701.2	2	0.003	701.2	3	0.002	701.2	4	0.001	701.2	5	0.002
701.667	1	0.004	701.667	2	0.004	701.667	3	0.002	701.667	4	0.002	701.667	5	0.002
702.134	1	0.005	702.134	2	0.005	702.134	3	0.002	702.134	4	0.002	702.134	5	0.002
702.602	1	0.005	702.602	2	0.005	702.602	3	0.002	702.602	4	0.003	702.602	5	0.003
703.069	1	0.006	703.069	2	0.006	703.069	3	0.003	703.069	4	0.003	703.069	5	0.004
703.536	1	0.006	703.536	2	0.006	703.536	3	0.004	703.536	4	0.004	703.536	5	0.004
704.004	1	0.007	704.004	2	0.007	704.004	3	0.004	704.004	4	0.005	704.004	5	0.005
704.471	1	0.007	704.471	2	0.007	704.471	3	0.005	704.471	4	0.005	704.471	5	0.005
704.939	1	0.007	704.939	2	0.007	704.939	3	0.005	704.939	4	0.005	704.939	5	0.005
705.407	1	0.007	705.407	2	0.007	705.407	3	0.005	705.407	4	0.005	705.407	5	0.005
705.874	1	0.006	705.874	2	0.006	705.874	3	0.005	705.874	4	0.005	705.874	5	0.005
706.342	1	0.006	706.342	2	0.006	706.342	3	0.005	706.342	4	0.005	706.342	5	0.005
706.81	1	0.006	706.81	2	0.006	706.81	3	0.004	706.81	4	0.005	706.81	5	0.005
707.277	1	0.005	707.277	2	0.005	707.277	3	0.004	707.277	4	0.005	707.277	5	0.005
707.745	1	0.005	707.745	2	0.005	707.745	3	0.004	707.745	4	0.005	707.745	5	0.005
708.213	1	0.004	708.213	2	0.004	708.213	3	0.004	708.213	4	0.005	708.213	5	0.004
708.681	1	0.004	708.681	2	0.004	708.681	3	0.004	708.681	4	0.004	708.681	5	0.004
709.148	1	0.003	709.148	2	0.003	709.148	3	0.004	709.148	4	0.004	709.148	5	0.004
709.616	1	0.003	709.616	2	0.003	709.616	3	0.004	709.616	4	0.004	709.616	5	0.004
710.084	1	0.003	710.084	2	0.003	710.084	3	0.003	710.084	4	0.004	710.084	5	0.004
710.552	1	0.003	710.552	2	0.003	710.552	3	0.003	710.552	4	0.004	710.552	5	0.003
711.02	1	0.003	711.02	2	0.003	711.02	3	0.003	711.02	4	0.003	711.02	5	0.003
711.488	1	0.002	711.488	2	0.003	711.488	3	0.003	711.488	4	0.003	711.488	5	0.003
711.956	1	0.002	711.956	2	0.002	711.956	3	0.003	711.956	4	0.003	711.956	5	0.002
712.424	1	0.001	712.424	2	0.002	712.424	3	0.002	712.424	4	0.002	712.424	5	0.002
712.893	1	0.001	712.893	2	0.001	712.893	3	0.001	712.893	4	0.001	712.893	5	0.001
713.361	1	0	713.361	2	0.001	713.361	3	0	713.361	4	0	713.361	5	0
713.829	1	0	713.829	2	0	713.829	3	0	713.829	4	0	713.829	5	0
714.297	1	0	714.297	2	0	714.297	3	-0.001	714.297	4	-0.001	714.297	5	-0.001
714.765	1	-0.001	714.765	2	-0.001	714.765	3	-0.001	714.765	4	-0.001	714.765	5	-0.001
715.234	1	-0.001	715.234	2	-0.001	715.234	3	-0.001	715.234	4	-0.001	715.234	5	-0.001
715.702	1	-0.001	715.702	2	0	715.702	3	-0.001	715.702	4	0	715.702	5	0
716.17	1	0	716.17	2	0	716.17	3	0	716.17	4	0	716.17	5	0.001
716.639	1	0	716.639	2	0	716.639	3	0	716.639	4	0.001	716.639	5	0.001
717.107	1	0.001	717.107	2	0.001	717.107	3	0.001	717.107	4	0.002	717.107	5	0.002
717.576	1	0.001	717.576	2	0.001	717.576	3	0.002	717.576	4	0.002	717.576	5	0.003
718.044	1	0.002	718.044	2	0.002	718.044	3	0.002	718.044	4	0.003	718.044	5	0.004
718.513	1	0.003	718.513	2	0.003	718.513	3	0.003	718.513	4	0.004	718.513	5	0.004
718.981	1	0.004	718.981	2	0.004	718.981	3	0.004	718.981	4	0.004	718.981	5	0.005
719.45	1	0.004	719.45	2	0.004	719.45	3	0.004	719.45	4	0.005	719.45	5	0.005
719.919	1	0.004	719.919	2	0.004	719.919	3	0.004	719.919	4	0.004	719.919	5	0.004
720.387	1	0.003	720.387	2	0.003	720.387	3	0.004	720.387	4	0.003	720.387	5	0.004
720.856	1	0.003	720.856	2	0.002	720.856	3	0.003	720.856	4	0.003	720.856	5	0.003
721.325	1	0.002	721.325	2	0.002	721.325	3	0.002	721.325	4	0.002	721.325	5	0.002
721.793	1	0.002	721.793	2	0.001	721.793	3	0.001	721.793	4	0.001	721.793	5	0.001
722.262	1	0.001	722.262	2	0.001	722.262	3	0.001	722.262	4	0.001	722.262	5	0.001
722.731	1	0.001	722.731	2	0	722.731	3	0.001	722.731	4	0	722.731	5	0
723.2	1	0	723.2	2	0	723.2	3	0.001	723.2	4	0	723.2	5	0
723.669	1	0	723.669	2	0	723.669	3	0.001	723.669	4	0	723.669	5	0
724.138	1	0	724.138	2	0	724.138	3	0.001	724.138	4	0	724.138	5	-0.001
724.607	1	0	724.607	2	0	724.607	3	0.001	724.607	4	0	724.607	5	0
725.076	1	0	725.076	2	0	725.076	3	0.001	725.076	4	0	725.076	5	0
725.545	1	0.001	725.545	2	0	725.545	3	0.002	725.545	4	0.001	725.545	5	0
726.014	1	0.001	726.014	2	0.001	726.014	3	0.002	726.014	4	0.001	726.014	5	0.001
726.483	1	0.001	726.483	2	0.001	726.483	3	0.002	726.483	4	0.001	726.483	5	0.001
726.952	1	0.001	726.952	2	0.001	726.952	3	0.002	726.952	4	0.001	726.952	5	0.001
727.421	1	0.001	727.421	2	0.002	727.421	3	0.002	727.421	4	0.001	727.421	5	0.001
727.89	1	0.002	727.89	2	0.002	727.89	3	0.002	727.89	4	0.002	727.89	5	0.002
728.36	1	0.002	728.36	2	0.002	728.36	3	0.003	728.36	4	0.002	728.36	5	0.002
728.829	1	0.002	728.829	2	0.003	728.829	3	0.003	728.829	4	0.002	728.829	5	0.003
729.298	1	0.003	729.298	2	0.003	729.298	3	0.004	729.298	4	0.003	729.298	5	0.004
729.768	1	0.003	729.768	2	0.004	729.768	3	0.004	729.768	4	0.003	729.768	5	0.005
730.237	1	0.004	730.237	2	0.004	730.237	3	0.004	730.237	4	0.004	730.237	5	0.006
730.706	1	0.005	730.706	2	0.005	730.706	3	0.005	730.706	4	0.004	730.706	5	0.006
731.176	1	0.005	731.176	2	0.005	731.176	3	0.005	731.176	4	0.005	731.176	5	0.006
731.645	1	0.005	731.645	2	0.005	731.645	3	0.005	731.645	4	0.005	731.645	5	0.006
732.115	1	0.005	732.115	2	0.005	732.115	3	0.005	732.115	4	0.004	732.115	5	0.006
732.584	1	0.005	732.584	2	0.004	732.584	3	0.005	732.584	4	0.005	732.584	5	0.006
733.054	1	0.004	733.054	2	0.004	733.054	3	0.005	733.054	4	0.004	733.054	5	0.006
733.523	1	0.004	733.523	2	0.004	733.523	3	0.004	733.523	4	0.004	733.523	5	0.005
733.993	1	0.004	733.993	2	0.003	733.993	3	0.003	733.993	4	0.003	733.993	5	0.005
734.463	1	0.003	734.463	2	0.002	734.463	3	0.002	734.463	4	0.003	734.463	5	0.004
734.932	1	0.002	734.932	2	0.002	734.932	3	0.002	734.932	4	0.002	734.932	5	0.003
735.402	1	0.001	735.402	2	0.001	735.402	3	0.001	735.402	4	0.001	735.402	5	0.002
735.872	1	0	735.872	2	0	735.872	3	0	735.872	4	0	735.872	5	0.001
736.342	1	-0.001	736.342	2	-0.001	736.342	3	0	736.342	4	0	736.342	5	0
736.812	1	-0.001	736.812	2	-0.001	736.812	3	0	736.812	4	0	736.812	5	0
737.282	1	-0.001	737.282	2	-0.001	737.282	3	-0.001	737.282	4	0	737.282	5	-0.001
737.751	1	-0.001	737.751	2	0	737.751	3	0	737.751	4	0	737.751	5	-0.001
738.221	1	0	738.221	2	0	738.221	3	0	738.221	4	0	738.221	5	0
738.691	1	0	738.691	2	0	738.691	3	0	738.691	4	0	738.691	5	0
739.161	1	0	739.161	2	0	739.161	3	0.001	739.161	4	0	739.161	5	0
739.631	1	0	739.631	2	0.001	739.631	3	0.001	739.631	4	0.001	739.631	5	0
740.101	1	0	740.101	2	0.001	740.101	3	0.001	740.101	4	0.001	740.101	5	0
740.572	1	0	740.572	2	0.001	740.572	3	0.001	740.572	4	0.001	740.572	5	0
741.042	1	0.001	741.042	2	0.001	741.042	3	0.001	741.042	4	0.001	741.042	5	0
741.512	1	0	741.512	2	0	741.512	3	0.001	741.512	4	0.001	741.512	5	0
741.982	1	0	741.982	2	0	741.982	3	0.001	741.982	4	0	741.982	5	0
742.452	1	0	742.452	2	0	742.452	3	0	742.452	4	0	742.452	5	0
742.923	1	0	742.923	2	0	742.923	3	0	742.923	4	0	742.923	5	0
743.393	1	0	743.393	2	0.001	743.393	3	0.001	743.393	4	0	743.393	5	0
743.863	1	0	743.863	2	0.001	743.863	3	0.001	743.863	4	0	743.863	5	0
744.334	1	0	744.334	2	0	744.334	3	0	744.334	4	0	744.334	5	0
744.804	1	0.001	744.804	2	0.001	744.804	3	0	744.804	4	0	744.804	5	0
745.274	1	0.001	745.274	2	0.001	745.274	3	0	745.274	4	0	745.274	5	0
745.745	1	0.001	745.745	2	0.002	745.745	3	0.001	745.745	4	0	745.745	5	0.001
746.215	1	0.002	746.215	2	0.002	746.215	3	0.001	746.215	4	0.001	746.215	5	0.001
746.686	1	0.003	746.686	2	0.003	746.686	3	0.002	746.686	4	0.001	746.686	5	0.002
747.156	1	0.004	747.156	2	0.004	747.156	3	0.003	747.156	4	0.002	747.156	5	0.002
747.627	1	0.004	747.627	2	0.004	747.627	3	0.003	747.627	4	0.003	747.627	5	0.003
748.098	1	0.005	748.098	2	0.004	748.098	3	0.003	748.098	4	0.004	748.098	5	0.003
748.568	1	0.005	748.568	2	0.004	748.568	3	0.004	748.568	4	0.004	748.568	5	0.003
749.039	1	0.005	749.039	2	0.005	749.039	3	0.004	749.039	4	0.004	749.039	5	0.004
749.51	1	0.005	749.51	2	0.005	749.51	3	0.004	749.51	4	0.004	749.51	5	0.004
749.981	1	0.005	749.981	2	0.005	749.981	3	0.004	749.981	4	0.005	749.981	5	0.004
750.451	1	0.005	750.451	2	0.005	750.451	3	0.005	750.451	4	0.005	750.451	5	0.005
750.922	1	0.005	750.922	2	0.005	750.922	3	0.005	750.922	4	0.005	750.922	5	0.005
751.393	1	0.005	751.393	2	0.005	751.393	3	0.005	751.393	4	0.005	751.393	5	0.004
751.864	1	0.004	751.864	2	0.004	751.864	3	0.004	751.864	4	0.004	751.864	5	0.004
752.335	1	0.003	752.335	2	0.003	752.335	3	0.004	752.335	4	0.004	752.335	5	0.003
752.806	1	0.003	752.806	2	0.003	752.806	3	0.004	752.806	4	0.003	752.806	5	0.003
753.277	1	0.003	753.277	2	0.003	753.277	3	0.003	753.277	4	0.003	753.277	5	0.002
753.748	1	0.003	753.748	2	0.002	753.748	3	0.003	753.748	4	0.003	753.748	5	0.002
754.219	1	0.003	754.219	2	0.002	754.219	3	0.003	754.219	4	0.003	754.219	5	0.002
754.69	1	0.003	754.69	2	0.002	754.69	3	0.004	754.69	4	0.003	754.69	5	0.002
755.161	1	0.003	755.161	2	0.003	755.161	3	0.004	755.161	4	0.004	755.161	5	0.003
755.632	1	0.004	755.632	2	0.004	755.632	3	0.005	755.632	4	0.005	755.632	5	0.003
756.104	1	0.005	756.104	2	0.004	756.104	3	0.006	756.104	4	0.005	756.104	5	0.004
756.575	1	0.005	756.575	2	0.005	756.575	3	0.007	756.575	4	0.006	756.575	5	0.005
757.046	1	0.006	757.046	2	0.006	757.046	3	0.008	757.046	4	0.007	757.046	5	0.006
757.517	1	0.006	757.517	2	0.006	757.517	3	0.009	757.517	4	0.007	757.517	5	0.007
757.989	1	0.007	757.989	2	0.007	757.989	3	0.009	757.989	4	0.008	757.989	5	0.007
758.46	1	0.006	758.46	2	0.007	758.46	3	0.009	758.46	4	0.008	758.46	5	0.008
758.931	1	0.006	758.931	2	0.007	758.931	3	0.009	758.931	4	0.008	758.931	5	0.008
759.403	1	0.006	759.403	2	0.006	759.403	3	0.009	759.403	4	0.009	759.403	5	0.008
759.874	1	0.005	759.874	2	0.006	759.874	3	0.009	759.874	4	0.008	759.874	5	0.007
760.346	1	0.005	760.346	2	0.006	760.346	3	0.009	760.346	4	0.008	760.346	5	0.008
760.817	1	0.006	760.817	2	0.006	760.817	3	0.01	760.817	4	0.009	760.817	5	0.009
761.289	1	0.007	761.289	2	0.007	761.289	3	0.011	761.289	4	0.01	761.289	5	0.01
761.76	1	0.008	761.76	2	0.008	761.76	3	0.011	761.76	4	0.011	761.76	5	0.011
762.232	1	0.008	762.232	2	0.008	762.232	3	0.011	762.232	4	0.011	762.232	5	0.011
762.704	1	0.007	762.704	2	0.008	762.704	3	0.01	762.704	4	0.01	762.704	5	0.01
763.175	1	0.007	763.175	2	0.007	763.175	3	0.01	763.175	4	0.01	763.175	5	0.01
763.647	1	0.007	763.647	2	0.007	763.647	3	0.01	763.647	4	0.009	763.647	5	0.01
764.119	1	0.007	764.119	2	0.008	764.119	3	0.01	764.119	4	0.009	764.119	5	0.01
764.591	1	0.008	764.591	2	0.008	764.591	3	0.009	764.591	4	0.009	764.591	5	0.01
765.062	1	0.008	765.062	2	0.008	765.062	3	0.01	765.062	4	0.009	765.062	5	0.01
765.534	1	0.008	765.534	2	0.008	765.534	3	0.009	765.534	4	0.009	765.534	5	0.009
766.006	1	0.007	766.006	2	0.007	766.006	3	0.008	766.006	4	0.008	766.006	5	0.008
766.478	1	0.006	766.478	2	0.006	766.478	3	0.007	766.478	4	0.006	766.478	5	0.006
766.95	1	0.005	766.95	2	0.005	766.95	3	0.006	766.95	4	0.005	766.95	5	0.005
767.422	1	0.005	767.422	2	0.005	767.422	3	0.005	767.422	4	0.004	767.422	5	0.004
767.894	1	0.005	767.894	2	0.005	767.894	3	0.005	767.894	4	0.004	767.894	5	0.003
768.366	1	0.006	768.366	2	0.005	768.366	3	0.006	768.366	4	0.003	768.366	5	0.003
768.838	1	0.006	768.838	2	0.006	768.838	3	0.005	768.838	4	0.003	768.838	5	0.003
769.31	1	0.006	769.31	2	0.005	769.31	3	0.005	769.31	4	0.003	769.31	5	0.003
769.782	1	0.005	769.782	2	0.005	769.782	3	0.005	769.782	4	0.003	769.782	5	0.002
770.255	1	0.005	770.255	2	0.004	770.255	3	0.004	770.255	4	0.002	770.255	5	0.002
770.727	1	0.004	770.727	2	0.004	770.727	3	0.004	770.727	4	0.002	770.727	5	0.002
771.199	1	0.004	771.199	2	0.003	771.199	3	0.003	771.199	4	0.001	771.199	5	0.001
771.671	1	0.003	771.671	2	0.002	771.671	3	0.002	771.671	4	0.001	771.671	5	0.001
772.144	1	0.002	772.144	2	0.001	772.144	3	0.002	772.144	4	0	772.144	5	0.001
772.616	1	0.001	772.616	2	0.001	772.616	3	0.001	772.616	4	0	772.616	5	0.001
773.088	1	0.001	773.088	2	0	773.088	3	0	773.088	4	0	773.088	5	0
773.561	1	0	773.561	2	0	773.561	3	0	773.561	4	0	773.561	5	0
774.033	1	0	774.033	2	0	774.033	3	-0.001	774.033	4	-0.001	774.033	5	0
774.506	1	0	774.506	2	-0.001	774.506	3	-0.001	774.506	4	-0.001	774.506	5	0
774.978	1	0	774.978	2	-0.001	774.978	3	-0.001	774.978	4	-0.001	774.978	5	-0.001
775.451	1	0	775.451	2	-0.001	775.451	3	-0.001	775.451	4	-0.001	775.451	5	0
775.923	1	0	775.923	2	0	775.923	3	0	775.923	4	0	775.923	5	0
776.396	1	0	776.396	2	0.001	776.396	3	0	776.396	4	0	776.396	5	0
776.868	1	0.001	776.868	2	0.001	776.868	3	0.001	776.868	4	0.001	776.868	5	0.001
777.341	1	0.001	777.341	2	0.002	777.341	3	0.001	777.341	4	0.001	777.341	5	0.002
777.814	1	0.002	777.814	2	0.002	777.814	3	0.002	777.814	4	0.002	777.814	5	0.002
778.287	1	0.003	778.287	2	0.003	778.287	3	0.003	778.287	4	0.002	778.287	5	0.003
778.759	1	0.003	778.759	2	0.003	778.759	3	0.003	778.759	4	0.003	778.759	5	0.003
779.232	1	0.004	779.232	2	0.004	779.232	3	0.004	779.232	4	0.004	779.232	5	0.004
779.705	1	0.005	779.705	2	0.005	779.705	3	0.004	779.705	4	0.004	779.705	5	0.005
780.178	1	0.006	780.178	2	0.006	780.178	3	0.005	780.178	4	0.005	780.178	5	0.006
780.651	1	0.006	780.651	2	0.006	780.651	3	0.006	780.651	4	0.006	780.651	5	0.006
781.124	1	0.007	781.124	2	0.006	781.124	3	0.006	781.124	4	0.006	781.124	5	0.006
781.597	1	0.007	781.597	2	0.006	781.597	3	0.006	781.597	4	0.006	781.597	5	0.006
782.07	1	0.007	782.07	2	0.006	782.07	3	0.007	782.07	4	0.006	782.07	5	0.006
782.543	1	0.007	782.543	2	0.006	782.543	3	0.007	782.543	4	0.005	782.543	5	0.006
783.016	1	0.006	783.016	2	0.006	783.016	3	0.006	783.016	4	0.005	783.016	5	0.005
783.489	1	0.006	783.489	2	0.005	783.489	3	0.006	783.489	4	0.005	783.489	5	0.004
783.962	1	0.004	783.962	2	0.005	783.962	3	0.006	783.962	4	0.005	783.962	5	0.004
784.435	1	0.003	784.435	2	0.004	784.435	3	0.005	784.435	4	0.004	784.435	5	0.003
784.908	1	0.002	784.908	2	0.004	784.908	3	0.005	784.908	4	0.003	784.908	5	0.003
785.381	1	0.002	785.381	2	0.003	785.381	3	0.004	785.381	4	0.003	785.381	5	0.002
785.855	1	0.002	785.855	2	0.003	785.855	3	0.004	785.855	4	0.002	785.855	5	0.002
786.328	1	0.002	786.328	2	0.003	786.328	3	0.004	786.328	4	0.003	786.328	5	0.002
786.801	1	0.002	786.801	2	0.003	786.801	3	0.004	786.801	4	0.003	786.801	5	0.003
787.275	1	0.002	787.275	2	0.003	787.275	3	0.003	787.275	4	0.003	787.275	5	0.003
787.748	1	0.002	787.748	2	0.003	787.748	3	0.003	787.748	4	0.002	787.748	5	0.002
788.221	1	0.002	788.221	2	0.002	788.221	3	0.002	788.221	4	0.002	788.221	5	0.002
788.695	1	0.001	788.695	2	0.002	788.695	3	0.002	788.695	4	0.002	788.695	5	0.003
789.168	1	0.001	789.168	2	0.002	789.168	3	0.002	789.168	4	0.002	789.168	5	0.002
789.642	1	0.002	789.642	2	0.002	789.642	3	0.002	789.642	4	0.002	789.642	5	0.002
790.115	1	0.002	790.115	2	0.001	790.115	3	0.001	790.115	4	0.002	790.115	5	0.002
790.589	1	0.001	790.589	2	0.001	790.589	3	0.001	790.589	4	0.001	790.589	5	0.001
791.062	1	0	791.062	2	0	791.062	3	0	791.062	4	0.001	791.062	5	0
791.536	1	0	791.536	2	0	791.536	3	0	791.536	4	0	791.536	5	0
792.01	1	-0.001	792.01	2	-0.001	792.01	3	-0.001	792.01	4	0	792.01	5	-0.001
792.483	1	-0.001	792.483	2	-0.001	792.483	3	0	792.483	4	0	792.483	5	-0.001
792.957	1	-0.001	792.957	2	-0.001	792.957	3	0	792.957	4	0	792.957	5	-0.001
793.431	1	0	793.431	2	0	793.431	3	0	793.431	4	0	793.431	5	0
793.905	1	0	793.905	2	0.001	793.905	3	0.001	793.905	4	0.001	793.905	5	0.001
794.379	1	0.001	794.379	2	0.001	794.379	3	0.001	794.379	4	0.001	794.379	5	0.001
794.852	1	0.002	794.852	2	0.002	794.852	3	0.002	794.852	4	0.002	794.852	5	0.002
795.326	1	0.002	795.326	2	0.002	795.326	3	0.002	795.326	4	0.002	795.326	5	0.002
795.8	1	0.002	795.8	2	0.002	795.8	3	0.002	795.8	4	0.002	795.8	5	0.002
796.274	1	0.002	796.274	2	0.002	796.274	3	0.002	796.274	4	0.002	796.274	5	0.002
796.748	1	0.002	796.748	2	0.002	796.748	3	0.002	796.748	4	0.002	796.748	5	0.002
797.222	1	0.002	797.222	2	0.002	797.222	3	0.002	797.222	4	0.001	797.222	5	0.002
797.696	1	0.002	797.696	2	0.002	797.696	3	0.001	797.696	4	0.001	797.696	5	0.002
798.17	1	0.002	798.17	2	0.001	798.17	3	0.001	798.17	4	0.001	798.17	5	0.001
798.644	1	0.001	798.644	2	0.001	798.644	3	0.001	798.644	4	0.001	798.644	5	0.001
799.119	1	0.001	799.119		0	799.119	3	0.001	799.119	4	0	799.119	5	0.001
799.593	1	0.001	799.593		0	799.593	3	0.001	799.593	4	0	799.593	5	0
800.067	1		800.067			800.067			800.067			800.067
800.541	1		800.541			800.541			800.541			800.541
801.015	1		801.015			801.015			801.015			801.015
801.49	1		801.49			801.49			801.49			801.49
801.964	1		801.964			801.964			801.964			801.964
802.438	1		802.438			802.438			802.438			802.438
802.913	1		802.913			802.913			802.913			802.913
803.387	1		803.387			803.387			803.387			803.387
803.862	1		803.862			803.862			803.862			803.862
804.336	1		804.336			804.336			804.336			804.336
804.811	1		804.811			804.811			804.811			804.811
805.285	1		805.285			805.285			805.285			805.285
805.76	1		805.76			805.76			805.76			805.76
806.235	1		806.235			806.235			806.235			806.235
806.709	1		806.709			806.709			806.709			806.709
807.184	1		807.184			807.184			807.184			807.184
807.659	1		807.659			807.659			807.659			807.659
808.133	1		808.133			808.133			808.133			808.133
808.608	1		808.608			808.608			808.608			808.608
809.083	1		809.083			809.083			809.083			809.083
809.558	1		809.558			809.558			809.558			809.558
810.033	1		810.033			810.033			810.033			810.033
810.508	1		810.508			810.508			810.508			810.508
810.983	1		810.983			810.983			810.983			810.983
811.458	1		811.458			811.458			811.458			811.458
811.933	1		811.933			811.933			811.933			811.933
812.408	1		812.408			812.408			812.408			812.408
812.883	1		812.883			812.883			812.883			812.883
813.358	1		813.358			813.358			813.358			813.358
813.833	1		813.833			813.833			813.833			813.833
814.308	1		814.308			814.308			814.308			814.308
814.783	1		814.783			814.783			814.783			814.783
815.258	1		815.258			815.258			815.258			815.258
815.734	1		815.734			815.734			815.734			815.734
816.209	1		816.209			816.209			816.209			816.209
816.684	1		816.684			816.684			816.684			816.684
817.16	1		817.16			817.16			817.16			817.16
817.635	1		817.635			817.635			817.635			817.635
818.111	1		818.111			818.111			818.111			818.111
818.586	1		818.586			818.586			818.586			818.586
819.061	1		819.061			819.061			819.061			819.061
819.537	1		819.537			819.537			819.537			819.537
820.013	1		820.013			820.013			820.013			820.013
820.488	1		820.488			820.488			820.488			820.488
820.964	1		820.964			820.964			820.964			820.964
821.439	1		821.439			821.439			821.439			821.439
821.915	1		821.915			821.915			821.915			821.915
822.391	1		822.391			822.391			822.391			822.391
822.866	1		822.866			822.866			822.866			822.866
823.342	1		823.342			823.342			823.342			823.342
823.818	1		823.818			823.818			823.818			823.818
824.294	1		824.294			824.294			824.294			824.294
824.77	1		824.77			824.77			824.77			824.77
825.246	1		825.246			825.246			825.246			825.246
825.721	1		825.721			825.721			825.721			825.721
826.197	1		826.197			826.197			826.197			826.197
826.673	1		826.673			826.673			826.673			826.673
827.149	1		827.149			827.149			827.149			827.149
827.626	1		827.626			827.626			827.626			827.626
828.102	1		828.102			828.102			828.102			828.102
828.578	1		828.578			828.578			828.578			828.578
829.054	1		829.054			829.054			829.054			829.054
829.53	1		829.53			829.53			829.53			829.53
830.006	1		830.006			830.006			830.006			830.006
830.482	1		830.482			830.482			830.482			830.482
830.959	1		830.959			830.959			830.959			830.959
831.435	1		831.435			831.435			831.435			831.435
831.911	1		831.911			831.911			831.911			831.911
832.388	1		832.388			832.388			832.388			832.388
832.864	1		832.864			832.864			832.864			832.864
833.341	1		833.341			833.341			833.341			833.341
833.817	1		833.817			833.817			833.817			833.817
834.294	1		834.294			834.294			834.294			834.294
834.77	1		834.77			834.77			834.77			834.77
835.247	1		835.247			835.247			835.247			835.247
835.723	1		835.723			835.723			835.723			835.723
836.2	1		836.2			836.2			836.2			836.2
836.676	1		836.676			836.676			836.676			836.676
837.153	1		837.153			837.153			837.153			837.153
837.63	1		837.63			837.63			837.63			837.63
838.107	1		838.107			838.107			838.107			838.107
838.583	1		838.583			838.583			838.583			838.583
839.06	1		839.06			839.06			839.06			839.06
839.537	1		839.537			839.537			839.537			839.537
840.014	1		840.014			840.014			840.014			840.014
840.491	1		840.491			840.491			840.491			840.491
840.968	1		840.968			840.968			840.968			840.968
841.445	1		841.445			841.445			841.445			841.445
841.922	1		841.922			841.922			841.922			841.922
842.399	1		842.399			842.399			842.399			842.399
842.876	1		842.876			842.876			842.876			842.876
843.353	1		843.353			843.353			843.353			843.353
843.83	1		843.83			843.83			843.83			843.83
844.307	1		844.307			844.307			844.307			844.307
844.784	1		844.784			844.784			844.784			844.784
845.261	1		845.261			845.261			845.261			845.261
845.739	1		845.739			845.739			845.739			845.739
846.216	1		846.216			846.216			846.216			846.216
846.693	1		846.693			846.693			846.693			846.693
847.17	1		847.17			847.17			847.17			847.17
847.648	1		847.648			847.648			847.648			847.648
848.125	1		848.125			848.125			848.125			848.125
848.603	1		848.603			848.603			848.603			848.603
849.08	1		849.08			849.08			849.08			849.08
849.558	1		849.558			849.558			849.558			849.558
850.035	1		850.035			850.035			850.035			850.035
850.513	1		850.513			850.513			850.513			850.513
850.99	1		850.99			850.99			850.99			850.99
851.468	1		851.468			851.468			851.468			851.468
851.945	1		851.945			851.945			851.945			851.945
852.423	1		852.423			852.423			852.423			852.423
852.901	1		852.901			852.901			852.901			852.901
853.379	1		853.379			853.379			853.379			853.379
853.856	1		853.856			853.856			853.856			853.856
854.334	1		854.334			854.334			854.334			854.334
854.812	1		854.812			854.812			854.812			854.812
855.29	1		855.29			855.29			855.29			855.29
855.768	1		855.768			855.768			855.768			855.768
856.246	1		856.246			856.246			856.246			856.246
856.724	1		856.724			856.724			856.724			856.724
857.202	1		857.202			857.202			857.202			857.202
857.68	1		857.68			857.68			857.68			857.68
858.158	1		858.158			858.158			858.158			858.158
858.636	1		858.636			858.636			858.636			858.636
859.114	1		859.114			859.114			859.114			859.114
859.592	1		859.592			859.592			859.592			859.592
860.07	1		860.07			860.07			860.07			860.07
860.548	1		860.548			860.548			860.548			860.548
861.026	1		861.026			861.026			861.026			861.026
861.505	1		861.505			861.505			861.505			861.505
861.983	1		861.983			861.983			861.983			861.983
862.461	1		862.461			862.461			862.461			862.461
862.94	1		862.94			862.94			862.94			862.94
863.418	1		863.418			863.418			863.418			863.418
863.896	1		863.896			863.896			863.896			863.896
864.375	1		864.375			864.375			864.375			864.375
864.853	1		864.853			864.853			864.853			864.853
865.332	1		865.332			865.332			865.332			865.332
865.81	1		865.81			865.81			865.81			865.81
866.289	1		866.289			866.289			866.289			866.289
866.768	1		866.768			866.768			866.768			866.768
867.246	1		867.246			867.246			867.246			867.246
867.725	1		867.725			867.725			867.725			867.725
868.204	1		868.204			868.204			868.204			868.204
868.682	1		868.682			868.682			868.682			868.682
869.161	1		869.161			869.161			869.161			869.161
869.64	1		869.64			869.64			869.64			869.64
870.119	1		870.119			870.119			870.119			870.119
870.597	1		870.597			870.597			870.597			870.597
871.076	1		871.076			871.076			871.076			871.076
871.555	1		871.555			871.555			871.555			871.555
872.034	1		872.034			872.034			872.034			872.034
872.513	1		872.513			872.513			872.513			872.513
872.992	1		872.992			872.992			872.992			872.992
873.471	1		873.471			873.471			873.471			873.471
873.95	1		873.95			873.95			873.95			873.95
874.429	1		874.429			874.429			874.429			874.429
874.908	1		874.908			874.908			874.908			874.908
875.388	1		875.388			875.388			875.388			875.388
875.867	1		875.867			875.867			875.867			875.867
876.346	1		876.346			876.346			876.346			876.346
876.825	1		876.825			876.825			876.825			876.825
877.304	1		877.304			877.304			877.304			877.304
877.784	1		877.784			877.784			877.784			877.784
878.263	1		878.263			878.263			878.263			878.263
878.742	1		878.742			878.742			878.742			878.742
879.222	1		879.222			879.222			879.222			879.222
879.701	1		879.701			879.701			879.701			879.701
880.181	1		880.181			880.181			880.181			880.181
880.66	1		880.66			880.66			880.66			880.66
881.14	1		881.14			881.14			881.14			881.14
881.619	1		881.619			881.619			881.619			881.619
882.099	1		882.099			882.099			882.099			882.099
882.578	1		882.578			882.578			882.578			882.578
883.058	1		883.058			883.058			883.058			883.058
883.538	1		883.538			883.538			883.538			883.538
884.017	1		884.017			884.017			884.017			884.017
884.497	1		884.497			884.497			884.497			884.497
884.977	1		884.977			884.977			884.977			884.977
885.457	1		885.457			885.457			885.457			885.457
885.936	1		885.936			885.936			885.936			885.936
886.416	1		886.416			886.416			886.416			886.416
886.896	1		886.896			886.896			886.896			886.896
887.376	1		887.376			887.376			887.376			887.376
887.856	1		887.856			887.856			887.856			887.856
888.336	1		888.336			888.336			888.336			888.336
888.816	1		888.816			888.816			888.816			888.816
889.296	1		889.296			889.296			889.296			889.296
889.776	1		889.776			889.776			889.776			889.776
890.256	1		890.256			890.256			890.256			890.256
890.736	1		890.736			890.736			890.736			890.736
891.216	1		891.216			891.216			891.216			891.216
891.696	1		891.696			891.696			891.696			891.696
892.177	1		892.177			892.177			892.177			892.177
892.657	1		892.657			892.657			892.657			892.657
893.137	1		893.137			893.137			893.137			893.137
893.617	1		893.617			893.617			893.617			893.617
894.098	1		894.098			894.098			894.098			894.098
894.578	1		894.578			894.578			894.578			894.578
895.059	1		895.059			895.059			895.059			895.059
895.539	1		895.539			895.539			895.539			895.539
896.019	1		896.019			896.019			896.019			896.019
896.5	1		896.5			896.5			896.5			896.5
896.98	1		896.98			896.98			896.98			896.98
897.461	1		897.461			897.461			897.461			897.461
897.941	1		897.941			897.941			897.941			897.941
898.422	1		898.422			898.422			898.422			898.422
898.903	1		898.903			898.903			898.903			898.903
899.383	1		899.383			899.383			899.383			899.383
899.864	1		899.864			899.864			899.864			899.864
900.345	1		900.345			900.345			900.345			900.345
900.826	1		900.826			900.826			900.826			900.826
901.306	1		901.306			901.306			901.306			901.306
901.787	1		901.787			901.787			901.787			901.787
902.268	1		902.268			902.268			902.268			902.268
902.749	1		902.749			902.749			902.749			902.749
903.23	1		903.23			903.23			903.23			903.23
903.711	1		903.711			903.711			903.711			903.711
904.192	1		904.192			904.192			904.192			904.192
904.673	1		904.673			904.673			904.673			904.673
905.154	1		905.154			905.154			905.154			905.154
905.635	1		905.635			905.635			905.635			905.635
906.116	1		906.116			906.116			906.116			906.116
906.597	1		906.597			906.597			906.597			906.597
907.078	1		907.078			907.078			907.078			907.078
907.559	1		907.559			907.559			907.559			907.559
908.04	1		908.04			908.04			908.04			908.04
908.521	1		908.521			908.521			908.521			908.521
909.003	1		909.003			909.003			909.003			909.003
909.484	1		909.484			909.484			909.484			909.484
910.447	1		910.447			910.447			910.447			910.447
910.928	1		910.928			910.928			910.928			910.928
911.409	1		911.409			911.409			911.409			911.409
911.891	1		911.891			911.891			911.891			911.891
912.372	1		912.372			912.372			912.372			912.372
912.854	1		912.854			912.854			912.854			912.854
913.335	1		913.335			913.335			913.335			913.335
913.817	1		913.817			913.817			913.817			913.817
914.299	1		914.299			914.299			914.299			914.299
914.78	1		914.78			914.78			914.78			914.78
915.262	1		915.262			915.262			915.262			915.262
915.743	1		915.743			915.743			915.743			915.743
916.225	1		916.225			916.225			916.225			916.225
916.707	1		916.707			916.707			916.707			916.707
917.189	1		917.189			917.189			917.189			917.189
917.67	1		917.67			917.67			917.67			917.67
918.152	1		918.152			918.152			918.152			918.152
918.634	1		918.634			918.634			918.634			918.634
919.116	1		919.116			919.116			919.116			919.116
919.598	1		919.598			919.598			919.598			919.598
920.776	1		920.776			920.776			920.776			920.776
923.601	1		923.601			923.601			923.601			923.601
926.429	1		926.429			926.429			926.429			926.429
929.258	1		929.258			929.258			929.258			929.258
932.089	1		932.089			932.089			932.089			932.089
934.921	1		934.921			934.921			934.921			934.921
937.755	1		937.755			937.755			937.755			937.755
940.591	1		940.591			940.591			940.591			940.591
943.428	1		943.428			943.428			943.428			943.428
946.267	1		946.267			946.267			946.267			946.267
949.108	1		949.108			949.108			949.108			949.108
951.951	1		951.951			951.951			951.951			951.951
954.794	1		954.794			954.794			954.794			954.794
957.64	1		957.64			957.64			957.64			957.64
960.487	1		960.487			960.487			960.487			960.487
963.336	1		963.336			963.336			963.336			963.336
966.186	1		966.186			966.186			966.186			966.186
969.038	1		969.038			969.038			969.038			969.038
971.891	1		971.891			971.891			971.891			971.891
974.746	1		974.746			974.746			974.746			974.746
977.602	1		977.602			977.602			977.602			977.602
980.46	1		980.46			980.46			980.46			980.46
983.32	1		983.32			983.32			983.32			983.32
986.181	1		986.181			986.181			986.181			986.181
989.043	1		989.043			989.043			989.043			989.043
991.907	1		991.907			991.907			991.907			991.907
994.772	1		994.772			994.772			994.772			994.772
997.639	1		997.639			997.639			997.639			997.639
1000.51	1		1000.51			1000.51			1000.51			1000.51
1003.38	1		1003.38			1003.38			1003.38			1003.38
1006.25	1		1006.25			1006.25			1006.25			1006.25
1009.12	1		1009.12			1009.12			1009.12			1009.12
1012	1		1012			1012			1012			1012
1014.87	1		1014.87			1014.87			1014.87			1014.87
1017.75	1		1017.75			1017.75			1017.75			1017.75
1020.62	1		1020.62			1020.62			1020.62			1020.62
1023.5	1		1023.5			1023.5			1023.5			1023.5
1026.38	1		1026.38			1026.38			1026.38			1026.38
1029.27	1		1029.27			1029.27			1029.27			1029.27
1032.15	1		1032.15			1032.15			1032.15			1032.15
1035.04	1		1035.04			1035.04			1035.04			1035.04
1037.92	1		1037.92			1037.92			1037.92			1037.92
1040.81	1		1040.81			1040.81			1040.81			1040.81
1043.7	1		1043.7			1043.7			1043.7			1043.7
1046.59	1		1046.59			1046.59			1046.59			1046.59
1049.48	1		1049.48			1049.48			1049.48			1049.48
1052.37	1		1052.37			1052.37			1052.37			1052.37
1055.27	1		1055.27			1055.27			1055.27			1055.27
1058.16	1		1058.16			1058.16			1058.16			1058.16
1061.06	1		1061.06			1061.06			1061.06			1061.06
1063.95	1		1063.95			1063.95			1063.95			1063.95
1066.85	1		1066.85			1066.85			1066.85			1066.85
1069.75	1		1069.75			1069.75			1069.75			1069.75
1072.65	1		1072.65			1072.65			1072.65			1072.65
1075.56	1		1075.56			1075.56			1075.56			1075.56
1078.46	1		1078.46			1078.46			1078.46			1078.46
1081.37	1		1081.37			1081.37			1081.37			1081.37
1084.27	1		1084.27			1084.27			1084.27			1084.27
1087.18	1		1087.18			1087.18			1087.18			1087.18
1090.09	1		1090.09			1090.09			1090.09			1090.09
1093	1		1093			1093			1093			1093
1095.91	1		1095.91			1095.91			1095.91			1095.91
1098.82	1		1098.82			1098.82			1098.82			1098.82
1101.73	1		1101.73			1101.73			1101.73			1101.73
1104.64	1		1104.64			1104.64			1104.64			1104.64
1107.56	1		1107.56			1107.56			1107.56			1107.56
1110.47	1		1110.47			1110.47			1110.47			1110.47
1113.39	1		1113.39			1113.39			1113.39			1113.39
1116.31	1		1116.31			1116.31			1116.31			1116.31
1119.23	1		1119.23			1119.23			1119.23			1119.23
1122.15	1		1122.15			1122.15			1122.15			1122.15
1125.07	1		1125.07			1125.07			1125.07			1125.07
1127.99	1		1127.99			1127.99			1127.99			1127.99
1130.91	1		1130.91			1130.91			1130.91			1130.91
1133.84	1		1133.84			1133.84			1133.84			1133.84
1136.76	1		1136.76			1136.76			1136.76			1136.76
1139.69	1		1139.69			1139.69			1139.69			1139.69
1142.62	1		1142.62			1142.62			1142.62			1142.62
1145.54	1		1145.54			1145.54			1145.54			1145.54
1148.47	1		1148.47			1148.47			1148.47			1148.47
1151.4	1		1151.4			1151.4			1151.4			1151.4
1154.33	1		1154.33			1154.33			1154.33			1154.33
1157.26	1		1157.26			1157.26			1157.26			1157.26
1160.2	1		1160.2			1160.2			1160.2			1160.2
1163.13	1		1163.13			1163.13			1163.13			1163.13
1166.06	1		1166.06			1166.06			1166.06			1166.06
1169	1		1169			1169			1169			1169
1171.93	1		1171.93			1171.93			1171.93			1171.93
1174.87	1		1174.87			1174.87			1174.87			1174.87
1177.81	1		1177.81			1177.81			1177.81			1177.81
1180.75	1		1180.75			1180.75			1180.75			1180.75
1183.68	1		1183.68			1183.68			1183.68			1183.68
1186.62	1		1186.62			1186.62			1186.62			1186.62
1189.57	1		1189.57			1189.57			1189.57			1189.57
1192.51	1		1192.51			1192.51			1192.51			1192.51
1195.45	1		1195.45			1195.45			1195.45			1195.45
1198.39	1		1198.39			1198.39			1198.39			1198.39
1201.34	1		1201.34			1201.34			1201.34			1201.34
1204.28	1		1204.28			1204.28			1204.28			1204.28
1207.23	1		1207.23			1207.23			1207.23			1207.23
1210.17	1		1210.17			1210.17			1210.17			1210.17
1213.12	1		1213.12			1213.12			1213.12			1213.12
1216.07	1		1216.07			1216.07			1216.07			1216.07
1219.02	1		1219.02			1219.02			1219.02			1219.02
1221.96	1		1221.96			1221.96			1221.96			1221.96
1224.91	1		1224.91			1224.91			1224.91			1224.91
1227.86	1		1227.86			1227.86			1227.86			1227.86
1230.81	1		1230.81			1230.81			1230.81			1230.81
1233.77	1		1233.77			1233.77			1233.77			1233.77
1236.72	1		1236.72			1236.72			1236.72			1236.72
1239.67	1		1239.67			1239.67			1239.67			1239.67
1242.62	1		1242.62			1242.62			1242.62			1242.62
1245.58	1		1245.58			1245.58			1245.58			1245.58
1248.53	1		1248.53			1248.53			1248.53			1248.53
1251.49	1		1251.49			1251.49			1251.49			1251.49
1254.44	1		1254.44			1254.44			1254.44			1254.44
1257.4	1		1257.4			1257.4			1257.4			1257.4
1260.36	1		1260.36			1260.36			1260.36			1260.36
1263.31	1		1263.31			1263.31			1263.31			1263.31
1266.27	1		1266.27			1266.27			1266.27			1266.27
1269.23	1		1269.23			1269.23			1269.23			1269.23
1272.19	1		1272.19			1272.19			1272.19			1272.19
1275.15	1		1275.15			1275.15			1275.15			1275.15
1278.11	1		1278.11			1278.11			1278.11			1278.11
1281.07	1		1281.07			1281.07			1281.07			1281.07
1284.03	1		1284.03			1284.03			1284.03			1284.03
1286.99	1		1286.99			1286.99			1286.99			1286.99
1289.95	1		1289.95			1289.95			1289.95			1289.95
1292.91	1		1292.91			1292.91			1292.91			1292.91
1295.88	1		1295.88			1295.88			1295.88			1295.88
1298.84	1		1298.84			1298.84			1298.84			1298.84
1301.8	1		1301.8			1301.8			1301.8			1301.8
1304.77	1		1304.77			1304.77			1304.77			1304.77
1307.73	1		1307.73			1307.73			1307.73			1307.73
1310.69	1		1310.69			1310.69			1310.69			1310.69
1313.66	1		1313.66			1313.66			1313.66			1313.66
1316.62	1		1316.62			1316.62			1316.62			1316.62
1319.59	1		1319.59			1319.59			1319.59			1319.59
1322.56	1		1322.56			1322.56			1322.56			1322.56
1325.52	1		1325.52			1325.52			1325.52			1325.52
1328.49	1		1328.49			1328.49			1328.49			1328.49
1331.45	1		1331.45			1331.45			1331.45			1331.45
1334.42	1		1334.42			1334.42			1334.42			1334.42
1337.39	1		1337.39			1337.39			1337.39			1337.39
1340.36	1		1340.36			1340.36			1340.36			1340.36
1343.33	1		1343.33			1343.33			1343.33			1343.33
1346.29	1		1346.29			1346.29			1346.29			1346.29
1349.26	1		1349.26			1349.26			1349.26			1349.26
1352.23	1		1352.23			1352.23			1352.23			1352.23
1355.2	1		1355.2			1355.2			1355.2			1355.2
1358.17	1		1358.17			1358.17			1358.17			1358.17
1361.14	1		1361.14			1361.14			1361.14			1361.14
1364.11	1		1364.11			1364.11			1364.11			1364.11
1367.08	1		1367.08			1367.08			1367.08			1367.08
1370.05	1		1370.05			1370.05			1370.05			1370.05
1373.02	1		1373.02			1373.02			1373.02			1373.02
1375.99	1		1375.99			1375.99			1375.99			1375.99
1378.96	1		1378.96			1378.96			1378.96			1378.96
1381.93	1		1381.93			1381.93			1381.93			1381.93
1384.9	1		1384.9			1384.9			1384.9			1384.9
1387.87	1		1387.87			1387.87			1387.87			1387.87
1390.84	1		1390.84			1390.84			1390.84			1390.84
1393.82	1		1393.82			1393.82			1393.82			1393.82
1396.79	1		1396.79			1396.79			1396.79			1396.79
1399.76	1		1399.76			1399.76			1399.76			1399.76
1402.73	1		1402.73			1402.73			1402.73			1402.73
1405.7	1		1405.7			1405.7			1405.7			1405.7
1408.67	1		1408.67			1408.67			1408.67			1408.67
1411.64	1		1411.64			1411.64			1411.64			1411.64
1414.62	1		1414.62			1414.62			1414.62			1414.62
1417.59	1		1417.59			1417.59			1417.59			1417.59
1420.56	1		1420.56			1420.56			1420.56			1420.56
1423.53	1		1423.53			1423.53			1423.53			1423.53
1426.5	1		1426.5			1426.5			1426.5			1426.5
1429.47	1		1429.47			1429.47			1429.47			1429.47
1432.44	1		1432.44			1432.44			1432.44			1432.44
1435.41	1		1435.41			1435.41			1435.41			1435.41
1438.39	1		1438.39			1438.39			1438.39			1438.39
1441.36	1		1441.36			1441.36			1441.36			1441.36
1444.33	1		1444.33			1444.33			1444.33			1444.33
1447.3	1		1447.3			1447.3			1447.3			1447.3
1450.27	1		1450.27			1450.27			1450.27			1450.27
1453.24	1		1453.24			1453.24			1453.24			1453.24
1456.21	1		1456.21			1456.21			1456.21			1456.21
1459.18	1		1459.18			1459.18			1459.18			1459.18
1462.15	1		1462.15			1462.15			1462.15			1462.15
1465.12	1		1465.12			1465.12			1465.12			1465.12
1468.1	1		1468.1			1468.1			1468.1			1468.1
1471.07	1		1471.07			1471.07			1471.07			1471.07
1474.04	1		1474.04			1474.04			1474.04			1474.04
1477.01	1		1477.01			1477.01			1477.01			1477.01
1479.97	1		1479.97			1479.97			1479.97			1479.97
1482.94	1		1482.94			1482.94			1482.94			1482.94
1485.91	1		1485.91			1485.91			1485.91			1485.91
1488.88	1		1488.88			1488.88			1488.88			1488.88
1491.85	1		1491.85			1491.85			1491.85			1491.85
1494.82	1		1494.82			1494.82			1494.82			1494.82
1497.79	1		1497.79			1497.79			1497.79			1497.79
1500.76	1		1500.76			1500.76			1500.76			1500.76
1503.72	1		1503.72			1503.72			1503.72			1503.72
1506.69	1		1506.69			1506.69			1506.69			1506.69
1509.66	1		1509.66			1509.66			1509.66			1509.66
1512.62	1		1512.62			1512.62			1512.62			1512.62
1515.59	1		1515.59			1515.59			1515.59			1515.59
1518.56	1		1518.56			1518.56			1518.56			1518.56
1521.52	1		1521.52			1521.52			1521.52			1521.52
1524.49	1		1524.49			1524.49			1524.49			1524.49
1527.45	1		1527.45			1527.45			1527.45			1527.45
1530.42	1		1530.42			1530.42			1530.42			1530.42
1533.38	1		1533.38			1533.38			1533.38			1533.38
1536.35	1		1536.35			1536.35			1536.35			1536.35
1539.31	1		1539.31			1539.31			1539.31			1539.31
1542.27	1		1542.27			1542.27			1542.27			1542.27
1545.24	1		1545.24			1545.24			1545.24			1545.24
1548.2	1		1548.2			1548.2			1548.2			1548.2
1551.16	1		1551.16			1551.16			1551.16			1551.16
1554.12	1		1554.12			1554.12			1554.12			1554.12
1557.08	1		1557.08			1557.08			1557.08			1557.08
1560.04	1		1560.04			1560.04			1560.04			1560.04
1563	1		1563			1563			1563			1563
1565.96	1		1565.96			1565.96			1565.96			1565.96
1568.92	1		1568.92			1568.92			1568.92			1568.92
1571.88	1		1571.88			1571.88			1571.88			1571.88
1574.84	1		1574.84			1574.84			1574.84			1574.84
1577.8	1		1577.8			1577.8			1577.8			1577.8
1580.76	1		1580.76			1580.76			1580.76			1580.76
1583.71	1		1583.71			1583.71			1583.71			1583.71
1586.67	1		1586.67			1586.67			1586.67			1586.67
1589.62	1		1589.62			1589.62			1589.62			1589.62
1592.58	1		1592.58			1592.58			1592.58			1592.58
1595.53	1		1595.53			1595.53			1595.53			1595.53
1598.48	1		1598.48			1598.48			1598.48			1598.48
1601.44	1		1601.44			1601.44			1601.44			1601.44
1604.39	1		1604.39			1604.39			1604.39			1604.39
1607.34	1		1607.34			1607.34			1607.34			1607.34
1610.29	1		1610.29			1610.29			1610.29			1610.29
1613.24	1		1613.24			1613.24			1613.24			1613.24
1616.19	1		1616.19			1616.19			1616.19			1616.19
1619.14	1		1619.14			1619.14			1619.14			1619.14
1622.09	1		1622.09			1622.09			1622.09			1622.09
1625.04	1		1625.04			1625.04			1625.04			1625.04
1627.99	1		1627.99			1627.99			1627.99			1627.99
1630.93	1		1630.93			1630.93			1630.93			1630.93
1633.88	1		1633.88			1633.88			1633.88			1633.88
1636.82	1		1636.82			1636.82			1636.82			1636.82
1639.77	1		1639.77			1639.77			1639.77			1639.77
1642.71	1		1642.71			1642.71			1642.71			1642.71
1645.65	1		1645.65			1645.65			1645.65			1645.65
1648.6	1		1648.6			1648.6			1648.6			1648.6
1651.54	1		1651.54			1651.54			1651.54			1651.54
1654.48	1		1654.48			1654.48			1654.48			1654.48
1657.42	1		1657.42			1657.42			1657.42			1657.42
1660.36	1		1660.36			1660.36			1660.36			1660.36
1663.29	1		1663.29			1663.29			1663.29			1663.29
1666.23	1		1666.23			1666.23			1666.23			1666.23
1669.17	1		1669.17			1669.17			1669.17			1669.17
1672.1	1		1672.1			1672.1			1672.1			1672.1
1675.04	1		1675.04			1675.04			1675.04			1675.04
1677.97	1		1677.97			1677.97			1677.97			1677.97
1680.9	1		1680.9			1680.9			1680.9			1680.9
1683.84	1		1683.84			1683.84			1683.84			1683.84
1686.77	1		1686.77			1686.77			1686.77			1686.77
1689.7	1		1689.7			1689.7			1689.7			1689.7
1692.63	1		1692.63			1692.63			1692.63			1692.63
1695.56	1		1695.56			1695.56			1695.56			1695.56
1698.48	1		1698.48			1698.48			1698.48			1698.48
1701.41	1		1701.41			1701.41			1701.41			1701.41
1704.33	1		1704.33			1704.33			1704.33			1704.33
1707.26	1		1707.26			1707.26			1707.26			1707.26
1710.18	1		1710.18			1710.18			1710.18			1710.18
1713.1	1		1713.1			1713.1			1713.1			1713.1
1716.03	1		1716.03			1716.03			1716.03			1716.03
1718.95	1		1718.95			1718.95			1718.95			1718.95
1721.87	1		1721.87			1721.87			1721.87			1721.87
1724.79	1		1724.79			1724.79			1724.79			1724.79
1727.7	1		1727.7			1727.7			1727.7			1727.7
1730.62	1		1730.62			1730.62			1730.62			1730.62
1733.53	1		1733.53			1733.53			1733.53			1733.53
1736.45	1		1736.45			1736.45			1736.45			1736.45
1739.36	1		1739.36			1739.36			1739.36			1739.36
1742.27	1		1742.27			1742.27			1742.27			1742.27
1745.18	1		1745.18			1745.18			1745.18			1745.18
1748.09	1		1748.09			1748.09			1748.09			1748.09
1751	1		1751			1751			1751			1751
1753.91	1		1753.91			1753.91			1753.91			1753.91
1756.82	1		1756.82			1756.82			1756.82			1756.82
1759.72	1		1759.72			1759.72			1759.72			1759.72
1762.63	1		1762.63			1762.63			1762.63			1762.63
1765.53	1		1765.53			1765.53			1765.53			1765.53
1768.43	1		1768.43			1768.43			1768.43			1768.43
1771.33	1		1771.33			1771.33			1771.33			1771.33
1774.23	1		1774.23			1774.23			1774.23			1774.23
1777.13	1		1777.13			1777.13			1777.13			1777.13
1780.03	1		1780.03			1780.03			1780.03			1780.03
1782.92	1		1782.92			1782.92			1782.92			1782.92
1785.82	1		1785.82			1785.82			1785.82			1785.82
1788.71	1		1788.71			1788.71			1788.71			1788.71
1791.6	1		1791.6			1791.6			1791.6			1791.6
1794.49	1		1794.49			1794.49			1794.49			1794.49
1797.38	1		1797.38			1797.38			1797.38			1797.38
1800.27	1		1800.27			1800.27			1800.27			1800.27
1803.16	1		1803.16			1803.16			1803.16			1803.16
1806.04	1		1806.04			1806.04			1806.04			1806.04
1808.93	1		1808.93			1808.93			1808.93			1808.93
1811.81	1		1811.81			1811.81			1811.81			1811.81
1814.69	1		1814.69			1814.69			1814.69			1814.69
1817.57	1		1817.57			1817.57			1817.57			1817.57
1820.45	1		1820.45			1820.45			1820.45			1820.45
1823.33	1		1823.33			1823.33			1823.33			1823.33
1826.21	1		1826.21			1826.21			1826.21			1826.21
1829.08	1		1829.08			1829.08			1829.08			1829.08
1831.95	1		1831.95			1831.95			1831.95			1831.95
1834.83	1		1834.83			1834.83			1834.83			1834.83
1837.7	1		1837.7			1837.7			1837.7			1837.7
1840.57	1		1840.57			1840.57			1840.57			1840.57
1843.43	1		1843.43			1843.43			1843.43			1843.43
1846.3	1		1846.3			1846.3			1846.3			1846.3
1849.16	1		1849.16			1849.16			1849.16			1849.16
1852.03	1		1852.03			1852.03			1852.03			1852.03
1854.89	1		1854.89			1854.89			1854.89			1854.89
1857.75	1		1857.75			1857.75			1857.75			1857.75
1860.61	1		1860.61			1860.61			1860.61			1860.61
1863.47	1		1863.47			1863.47			1863.47			1863.47
1866.32	1		1866.32			1866.32			1866.32			1866.32
1869.18	1		1869.18			1869.18			1869.18			1869.18
1872.03	1		1872.03			1872.03			1872.03			1872.03
1874.88	1		1874.88			1874.88			1874.88			1874.88
1877.73	1		1877.73			1877.73			1877.73			1877.73
1880.58	1		1880.58			1880.58			1880.58			1880.58
1883.42	1		1883.42			1883.42			1883.42			1883.42
1886.27	1		1886.27			1886.27			1886.27			1886.27
1889.11	1		1889.11			1889.11			1889.11			1889.11
1891.95	1		1891.95			1891.95			1891.95			1891.95
1894.79	1		1894.79			1894.79			1894.79			1894.79
1897.63	1		1897.63			1897.63			1897.63			1897.63
1900.47	1		1900.47			1900.47			1900.47			1900.47
1903.3	1		1903.3			1903.3			1903.3			1903.3
1906.14	1		1906.14			1906.14			1906.14			1906.14
1908.97	1		1908.97			1908.97			1908.97			1908.97
1911.8	1		1911.8			1911.8			1911.8			1911.8
1914.63	1		1914.63			1914.63			1914.63			1914.63
1917.45	1		1917.45			1917.45			1917.45			1917.45
1920.28	1		1920.28			1920.28			1920.28			1920.28
1923.1	1		1923.1			1923.1			1923.1			1923.1
1925.92	1		1925.92			1925.92			1925.92			1925.92
1928.74	1		1928.74			1928.74			1928.74			1928.74
1931.56	1		1931.56			1931.56			1931.56			1931.56
1934.38	1		1934.38			1934.38			1934.38			1934.38
1937.19	1		1937.19			1937.19			1937.19			1937.19
1940.01	1		1940.01			1940.01			1940.01			1940.01
1942.82	1		1942.82			1942.82			1942.82			1942.82
1945.63	1		1945.63			1945.63			1945.63			1945.63
1948.43	1		1948.43			1948.43			1948.43			1948.43
1951.24	1		1951.24			1951.24			1951.24			1951.24
1954.04	1		1954.04			1954.04			1954.04			1954.04
1956.84	1		1956.84			1956.84			1956.84			1956.84
1959.64	1		1959.64			1959.64			1959.64			1959.64
1962.44	1		1962.44			1962.44			1962.44			1962.44
1965.24	1		1965.24			1965.24			1965.24			1965.24
1968.03	1		1968.03			1968.03			1968.03			1968.03
1970.83	1		1970.83			1970.83			1970.83			1970.83
1973.62	1		1973.62			1973.62			1973.62			1973.62
1976.4	1		1976.4			1976.4			1976.4			1976.4
1979.19	1		1979.19			1979.19			1979.19			1979.19
1981.98	1		1981.98			1981.98			1981.98			1981.98
1984.76	1		1984.76			1984.76			1984.76			1984.76
1987.54	1		1987.54			1987.54			1987.54			1987.54
1990.32	1		1990.32			1990.32			1990.32			1990.32
1993.1	1		1993.1			1993.1			1993.1			1993.1
1995.87	1		1995.87			1995.87			1995.87			1995.87
1998.64	1		1998.64			1998.64			1998.64			1998.64
2001.41	1		2001.41			2001.41			2001.41			2001.41
2004.18	1		2004.18			2004.18			2004.18			2004.18
2006.95	1		2006.95			2006.95			2006.95			2006.95
2009.71	1		2009.71			2009.71			2009.71			2009.71
2012.48	1		2012.48			2012.48			2012.48			2012.48
2015.24	1		2015.24			2015.24			2015.24			2015.24
2018	1		2018			2018			2018			2018
2020.75	1		2020.75			2020.75			2020.75			2020.75
2023.51	1		2023.51			2023.51			2023.51			2023.51
2026.26	1		2026.26			2026.26			2026.26			2026.26
2029.01	1		2029.01			2029.01			2029.01			2029.01
2031.76	1		2031.76			2031.76			2031.76			2031.76
2034.51	1		2034.51			2034.51			2034.51			2034.51
2037.25	1		2037.25			2037.25			2037.25			2037.25
2039.99	1		2039.99			2039.99			2039.99			2039.99
2042.73	1		2042.73			2042.73			2042.73			2042.73
2045.47	1		2045.47			2045.47			2045.47			2045.47
2048.2	1		2048.2			2048.2			2048.2			2048.2
2050.94	1		2050.94			2050.94			2050.94			2050.94
2053.67	1		2053.67			2053.67			2053.67			2053.67
2056.4	1		2056.4			2056.4			2056.4			2056.4
2059.12	1		2059.12			2059.12			2059.12			2059.12
2061.85	1		2061.85			2061.85			2061.85			2061.85
2064.57	1		2064.57			2064.57			2064.57			2064.57
2067.29	1		2067.29			2067.29			2067.29			2067.29
2070.01	1		2070.01			2070.01			2070.01			2070.01
2072.72	1		2072.72			2072.72			2072.72			2072.72
2075.43	1		2075.43			2075.43			2075.43			2075.43
2078.15	1		2078.15			2078.15			2078.15			2078.15
2080.85	1		2080.85			2080.85			2080.85			2080.85
2083.56	1		2083.56			2083.56			2083.56			2083.56
2086.26	1		2086.26			2086.26			2086.26			2086.26
2088.97	1		2088.97			2088.97			2088.97			2088.97
2091.66	1		2091.66			2091.66			2091.66			2091.66
2094.36	1		2094.36			2094.36			2094.36			2094.36
2097.06	1		2097.06			2097.06			2097.06			2097.06
2099.75	1		2099.75			2099.75			2099.75			2099.75
	1
	1
	1
	1
	1
	1
	1
[truncated: 386 more rows]

## Sheet: Figure 5c
After			Before
MF	Counts		MF	Counts
X	[G]		X	[G]
3460	2242.22		3460	345.12
3460.1	2539.22		3460.1	-575.88
3460.2	2243.22		3460.2	-1108.88
3460.29	1582.22		3460.29	-1173.88
3460.39	2466.22		3460.39	453.12
3460.49	2733.22		3460.49	-847.88
3460.59	840.219		3460.59	1447.12
3460.68	1713.22		3460.68	1504.12
3460.78	1577.22		3460.78	-146.88
3460.88	2072.22		3460.88	1562.12
3460.98	1251.22		3460.98	1962.12
3461.08	1737.22		3461.08	1548.12
3461.17	3540.22		3461.17	955.12
3461.27	1973.22		3461.27	-93.8799
3461.37	877.219		3461.37	-421.88
3461.47	1120.22		3461.47	-1021.88
3461.56	2409.22		3461.56	423.12
3461.66	3071.22		3461.66	422.12
3461.76	3641.22		3461.76	810.12
3461.86	3314.22		3461.86	547.12
3461.96	1648.22		3461.96	-1547.88
3462.05	1115.22		3462.05	-448.88
3462.15	1388.22		3462.15	558.12
3462.25	2703.22		3462.25	748.12
3462.35	3847.22		3462.35	591.12
3462.44	3675.22		3462.44	64.1201
3462.54	3585.22		3462.54	-301.88
3462.64	2955.22		3462.64	1566.12
3462.74	2406.22		3462.74	-344.88
3462.83	1078.22		3462.83	-2007.88
3462.93	1485.22		3462.93	-1189.88
3463.03	1816.22		3463.03	2266.12
3463.13	1522.22		3463.13	1748.12
3463.23	2572.22		3463.23	1566.12
3463.32	1828.22		3463.32	2486.12
3463.42	1882.22		3463.42	110.12
3463.52	2311.22		3463.52	-735.88
3463.62	2000.22		3463.62	-354.88
3463.71	832.219		3463.71	-779.88
3463.81	599.219		3463.81	-58.8799
3463.91	1180.22		3463.91	1480.12
3464.01	1412.22		3464.01	-185.88
3464.11	2144.22		3464.11	383.12
3464.2	723.219		3464.2	2637.12
3464.3	1900.22		3464.3	1273.12
3464.4	2328.22		3464.4	214.12
3464.5	665.219		3464.5	185.12
3464.59	-30.7812		3464.59	539.12
3464.69	105.219		3464.69	2108.12
3464.79	-166.781		3464.79	1105.12
3464.89	1208.22		3464.89	-26.8799
3464.99	1518.22		3464.99	-318.88
3465.08	1530.22		3465.08	-299.88
3465.18	1524.22		3465.18	1505.12
3465.28	256.219		3465.28	362.12
3465.38	1529.22		3465.38	-93.8799
3465.47	3146.22		3465.47	889.12
3465.57	2535.22		3465.57	-1091.88
3465.67	1436.22		3465.67	-576.88
3465.77	929.219		3465.77	1892.12
3465.86	1067.22		3465.86	1132.12
3465.96	716.219		3465.96	306.12
3466.06	538.219		3466.06	2538.12
3466.16	755.219		3466.16	1204.12
3466.26	1133.22		3466.26	-265.88
3466.35	2042.22		3466.35	617.12
3466.45	1845.22		3466.45	-231.88
3466.55	947.219		3466.55	-74.8799
3466.65	629.219		3466.65	664.12
3466.74	614.219		3466.74	-466.88
3466.84	671.219		3466.84	-183.88
3466.94	-229.781		3466.94	2409.12
3467.04	1398.22		3467.04	2504.12
3467.14	857.219		3467.14	353.12
3467.23	1740.22		3467.23	-520.88
3467.33	1803.22		3467.33	-2205.88
3467.43	1309.22		3467.43	-332.88
3467.53	493.219		3467.53	1034.12
3467.62	509.219		3467.62	527.12
3467.72	1035.22		3467.72	398.12
3467.82	2538.22		3467.82	907.12
3467.92	911.219		3467.92	761.12
3468.02	1222.22		3468.02	550.12
3468.11	2199.22		3468.11	1372.12
3468.21	1634.22		3468.21	876.12
3468.31	1294.22		3468.31	1151.12
3468.41	1878.22		3468.41	397.12
3468.5	2300.22		3468.5	-827.88
3468.6	2647.22		3468.6	-1273.88
3468.7	1284.22		3468.7	-1306.88
3468.8	344.219		3468.8	-1538.88
3468.9	2635.22		3468.9	-833.88
3468.99	3380.22		3468.99	407.12
3469.09	1489.22		3469.09	-992.88
3469.19	1809.22		3469.19	-1182.88
3469.29	2410.22		3469.29	-1483.88
3469.38	3029.22		3469.38	-940.88
3469.48	1091.22		3469.48	-86.8799
3469.58	621.219		3469.58	-1249.88
3469.68	518.219		3469.68	939.12
3469.78	1617.22		3469.78	2059.12
3469.87	2354.22		3469.87	106.12
3469.97	2345.22		3469.97	223.12
3470.07	1792.22		3470.07	2042.12
3470.17	219.219		3470.17	481.12
3470.26	68.2188		3470.26	906.12
3470.36	121.219		3470.36	143.12
3470.46	1059.22		3470.46	1771.12
3470.56	2400.22		3470.56	910.12
3470.66	1722.22		3470.66	911.12
3470.75	1228.22		3470.75	-1856.88
3470.85	278.219		3470.85	4.12012
3470.95	660.219		3470.95	731.12
3471.05	567.219		3471.05	1290.12
3471.14	-113.781		3471.14	-396.88
3471.24	-238.781		3471.24	-788.88
3471.34	414.219		3471.34	327.12
3471.44	1642.22		3471.44	1061.12
3471.53	1662.22		3471.53	916.12
3471.63	852.219		3471.63	1755.12
3471.73	1202.22		3471.73	962.12
3471.83	1974.22		3471.83	1077.12
3471.93	1839.22		3471.93	177.12
3472.02	1881.22		3472.02	-752.88
3472.12	1274.22		3472.12	316.12
3472.22	493.219		3472.22	-157.88
3472.32	860.219		3472.32	-886.88
3472.41	1304.22		3472.41	1793.12
3472.51	2160.22		3472.51	2360.12
3472.61	692.219		3472.61	1769.12
3472.71	-1076.78		3472.71	1149.12
3472.81	578.219		3472.81	-512.88
3472.9	503.219		3472.9	-1857.88
3473	589.219		3473	-181.88
3473.1	1648.22		3473.1	561.12
3473.2	1441.22		3473.2	-249.88
3473.29	1884.22		3473.29	235.12
3473.39	1341.22		3473.39	586.12
3473.49	1648.22		3473.49	1076.12
3473.59	1173.22		3473.59	1104.12
3473.69	1335.22		3473.69	289.12
3473.78	1715.22		3473.78	1.12012
3473.88	1353.22		3473.88	-409.88
3473.98	1508.22		3473.98	55.1201
3474.08	1785.22		3474.08	708.12
3474.17	946.219		3474.17	419.12
3474.27	438.219		3474.27	828.12
3474.37	362.219		3474.37	-896.88
3474.47	1194.22		3474.47	-465.88
3474.56	1237.22		3474.56	-280.88
3474.66	810.219		3474.66	-1535.88
3474.76	1984.22		3474.76	-879.88
3474.86	1844.22		3474.86	1124.12
3474.96	1383.22		3474.96	1190.12
3475.05	876.219		3475.05	526.12
3475.15	892.219		3475.15	704.12
3475.25	614.219		3475.25	509.12
3475.35	2508.22		3475.35	-1616.88
3475.44	2796.22		3475.44	-370.88
3475.54	1626.22		3475.54	517.12
3475.64	1588.22		3475.64	232.12
3475.74	1131.22		3475.74	1399.12
3475.84	2497.22		3475.84	-65.8799
3475.93	1332.22		3475.93	-188.88
3476.03	317.219		3476.03	-1119.88
3476.13	1083.22		3476.13	-537.88
3476.23	2693.22		3476.23	62.1201
3476.32	1831.22		3476.32	-447.88
3476.42	122.219		3476.42	445.12
3476.52	-69.7812		3476.52	-138.88
3476.62	-216.781		3476.62	836.12
3476.72	635.219		3476.72	-338.88
3476.81	-29.7812		3476.81	-1732.88
3476.91	491.219		3476.91	-2683.88
3477.01	52.2188		3477.01	1708.12
3477.11	343.219		3477.11	1140.12
3477.2	1192.22		3477.2	158.12
3477.3	37.2188		3477.3	1144.12
3477.4	-252.781		3477.4	-159.88
3477.5	1528.22		3477.5	1657.12
3477.6	843.219		3477.6	1160.12
3477.69	1125.22		3477.69	-487.88
3477.79	241.219		3477.79	-373.88
3477.89	-201.781		3477.89	297.12
3477.99	43.2188		3477.99	1963.12
3478.08	656.219		3478.08	382.12
3478.18	1992.22		3478.18	1250.12
3478.28	2312.22		3478.28	1824.12
3478.38	-178.781		3478.38	-1518.88
3478.48	-318.781		3478.48	-2581.88
3478.57	-319.781		3478.57	-243.88
3478.67	-184.781		3478.67	-1702.88
3478.77	824.219		3478.77	-410.88
3478.87	71.2188		3478.87	213.12
3478.96	772.219		3478.96	92.1201
3479.06	1399.22		3479.06	1598.12
3479.16	475.219		3479.16	861.12
3479.26	452.219		3479.26	-287.88
3479.35	1168.22		3479.35	493.12
3479.45	-216.781		3479.45	-2185.88
3479.55	1159.22		3479.55	-586.88
3479.65	182.219		3479.65	49.1201
3479.75	688.219		3479.75	614.12
3479.84	718.219		3479.84	-60.8799
3479.94	-65.7812		3479.94	-52.8799
3480.04	-116.781		3480.04	567.12
3480.14	115.219		3480.14	-428.88
3480.23	546.219		3480.23	-350.88
3480.33	1578.22		3480.33	-37.8799
3480.43	290.219		3480.43	585.12
3480.53	55.2188		3480.53	-271.88
3480.63	-320.781		3480.63	-361.88
3480.72	1222.22		3480.72	326.12
3480.82	1488.22		3480.82	1057.12
3480.92	470.219		3480.92	2762.12
3481.02	-54.7812		3481.02	473.12
3481.11	-1051.78		3481.11	-485.88
3481.21	163.219		3481.21	-307.88
3481.31	-4.78125		3481.31	-213.88
3481.41	1013.22		3481.41	-1627.88
3481.51	1543.22		3481.51	-1386.88
3481.6	2934.22		3481.6	-197.88
3481.7	1705.22		3481.7	1702.12
3481.8	755.219		3481.8	-120.88
3481.9	876.219		3481.9	1306.12
3481.99	1549.22		3481.99	1542.12
3482.09	443.219		3482.09	896.12
3482.19	354.219		3482.19	-240.88
3482.29	-90.7812		3482.29	964.12
3482.39	370.219		3482.39	1127.12
3482.48	647.219		3482.48	525.12
3482.58	949.219		3482.58	-251.88
3482.68	1140.22		3482.68	-1151.88
3482.78	2500.22		3482.78	-1261.88
3482.87	2239.22		3482.87	135.12
3482.97	1762.22		3482.97	-241.88
3483.07	1579.22		3483.07	1044.12
3483.17	277.219		3483.17	-712.88
3483.26	-33.7812		3483.26	-584.88
3483.36	86.2188		3483.36	-29.8799
3483.46	531.219		3483.46	1153.12
3483.56	1057.22		3483.56	-398.88
3483.66	642.219		3483.66	-674.88
3483.75	-215.781		3483.75	-821.88
3483.85	-364.781		3483.85	-786.88
3483.95	447.219		3483.95	-377.88
3484.05	-465.781		3484.05	730.12
3484.14	561.219		3484.14	42.1201
3484.24	1425.22		3484.24	-505.88
3484.34	2091.22		3484.34	-351.88
3484.44	2300.22		3484.44	1486.12
3484.54	2117.22		3484.54	588.12
3484.63	2062.22		3484.63	1384.12
3484.73	2118.22		3484.73	-424.88
3484.83	491.219		3484.83	-1469.88
3484.93	878.219		3484.93	959.12
3485.02	1531.22		3485.02	1648.12
3485.12	2165.22		3485.12	-352.88
3485.22	2221.22		3485.22	-466.88
3485.32	1906.22		3485.32	1073.12
3485.42	1641.22		3485.42	-371.88
3485.51	1771.22		3485.51	1179.12
3485.61	3022.22		3485.61	956.12
3485.71	2668.22		3485.71	-909.88
3485.81	1468.22		3485.81	-222.88
3485.9	246.219		3485.9	1283.12
3486	664.219		3486	1773.12
3486.1	572.219		3486.1	213.12
3486.2	1038.22		3486.2	6.12012
3486.3	1397.22		3486.3	803.12
3486.39	756.219		3486.39	1109.12
3486.49	1513.22		3486.49	1647.12
3486.59	2162.22		3486.59	27.1201
3486.69	620.219		3486.69	-1682.88
3486.78	-80.7812		3486.78	-1313.88
3486.88	1051.22		3486.88	-292.88
3486.98	754.219		3486.98	1431.12
3487.08	1023.22		3487.08	-79.8799
3487.18	1561.22		3487.18	-379.88
3487.27	1179.22		3487.27	822.12
3487.37	1765.22		3487.37	511.12
3487.47	1640.22		3487.47	-1059.88
3487.57	591.219		3487.57	2000.12
3487.66	992.219		3487.66	1164.12
3487.76	900.219		3487.76	-295.88
3487.86	289.219		3487.86	314.12
3487.96	690.219		3487.96	579.12
3488.05	1676.22		3488.05	-360.88
3488.15	589.219		3488.15	-33.8799
3488.25	627.219		3488.25	366.12
3488.35	458.219		3488.35	372.12
3488.45	982.219		3488.45	-583.88
3488.54	289.219		3488.54	-191.88
3488.64	337.219		3488.64	-290.88
3488.74	749.219		3488.74	-905.88
3488.84	774.219		3488.84	-894.88
3488.93	340.219		3488.93	-7.87988
3489.03	-1102.78		3489.03	639.12
3489.13	-785.781		3489.13	-586.88
3489.23	217.219		3489.23	843.12
3489.33	2021.22		3489.33	-1426.88
3489.42	2434.22		3489.42	279.12
3489.52	1506.22		3489.52	1690.12
3489.62	572.219		3489.62	388.12
3489.72	-83.7812		3489.72	-1350.88
3489.81	473.219		3489.81	-462.88
3489.91	28.2188		3489.91	-1740.88
3490.01	1728.22		3490.01	-2503.88
3490.11	-4.78125		3490.11	-2968.88
3490.21	-269.781		3490.21	-647.88
3490.3	-817.781		3490.3	-141.88
3490.4	844.219		3490.4	473.12
3490.5	827.219		3490.5	-40.8799
3490.6	1650.22		3490.6	-871.88
3490.69	2774.22		3490.69	-1571.88
3490.79	2725.22		3490.79	-699.88
3490.89	2413.22		3490.89	842.12
3490.99	378.219		3490.99	630.12
3491.08	486.219		3491.08	489.12
3491.18	1042.22		3491.18	1694.12
3491.28	2058.22		3491.28	-587.88
3491.38	1765.22		3491.38	-1529.88
3491.48	1835.22		3491.48	844.12
3491.57	1883.22		3491.57	-23.8799
3491.67	2811.22		3491.67	858.12
3491.77	1387.22		3491.77	-592.88
3491.87	557.219		3491.87	-1950.88
3491.96	152.219		3491.96	-943.88
3492.06	868.219		3492.06	761.12
3492.16	914.219		3492.16	-420.88
3492.26	-602.781		3492.26	1636.12
3492.36	1257.22		3492.36	2236.12
3492.45	1953.22		3492.45	-690.88
3492.55	1270.22		3492.55	208.12
3492.65	1145.22		3492.65	684.12
3492.75	1406.22		3492.75	700.12
3492.84	1722.22		3492.84	-1059.88
3492.94	2499.22		3492.94	266.12
3493.04	3289.22		3493.04	-371.88
3493.14	2324.22		3493.14	-74.8799
3493.24	852.219		3493.24	728.12
3493.33	1238.22		3493.33	863.12
3493.43	1558.22		3493.43	-663.88
3493.53	1540.22		3493.53	-815.88
3493.63	1934.22		3493.63	54.1201
3493.72	2112.22		3493.72	-1503.88
3493.82	2944.22		3493.82	470.12
3493.92	2191.22		3493.92	277.12
3494.02	3206.22		3494.02	68.1201
3494.12	1979.22		3494.12	677.12
3494.21	2747.22		3494.21	-866.88
3494.31	1919.22		3494.31	346.12
3494.41	2298.22		3494.41	15.1201
3494.51	2876.22		3494.51	1653.12
3494.6	2229.22		3494.6	2469.12
3494.7	3309.22		3494.7	3303.12
3494.8	3283.22		3494.8	1478.12
3494.9	4069.22		3494.9	630.12
3495	4608.22		3495	-414.88
3495.09	4041.22		3495.09	807.12
3495.19	4805.22		3495.19	1961.12
3495.29	5343.22		3495.29	448.12
3495.39	4691.22		3495.39	270.12
3495.48	4323.22		3495.48	-296.88
3495.58	5762.22		3495.58	238.12
3495.68	6339.22		3495.68	1356.12
3495.78	5659.22		3495.78	564.12
3495.87	4809.22		3495.87	640.12
3495.97	5514.22		3495.97	765.12
3496.07	6404.22		3496.07	1460.12
3496.17	6995.22		3496.17	2663.12
3496.27	8350.22		3496.27	2409.12
3496.36	7769.22		3496.36	2372.12
3496.46	6989.22		3496.46	1231.12
3496.56	7583.22		3496.56	1238.12
3496.66	7609.22		3496.66	13.1201
3496.75	6497.22		3496.75	-1651.88
3496.85	7116.22		3496.85	-1745.88
3496.95	7424.22		3496.95	-250.88
3497.05	8517.22		3497.05	-213.88
3497.15	8597.22		3497.15	1344.12
3497.24	9139.22		3497.24	324.12
3497.34	9408.22		3497.34	195.12
3497.44	8725.22		3497.44	904.12
3497.54	10231.2		3497.54	-510.88
3497.63	11091.2		3497.63	1309.12
3497.73	10367.2		3497.73	2885.12
3497.83	10403.2		3497.83	1491.12
3497.93	11331.2		3497.93	-93.8799
3498.03	12071.2		3498.03	2056.12
3498.12	12949.2		3498.12	925.12
3498.22	13291.2		3498.22	-28.8799
3498.32	13681.2		3498.32	2701.12
3498.42	14463.2		3498.42	561.12
3498.51	15907.2		3498.51	1551.12
3498.61	15943.2		3498.61	-394.88
3498.71	16188.2		3498.71	-865.88
3498.81	17446.2		3498.81	-68.8799
3498.91	17352.2		3498.91	193.12
3499	18645.2		3499	-2520.88
3499.1	20186.2		3499.1	-2351.88
3499.2	20249.2		3499.2	787.12
3499.3	20814.2		3499.3	-394.88
3499.39	22178.2		3499.39	-534.88
3499.49	23478.2		3499.49	-263.88
3499.59	23420.2		3499.59	-594.88
3499.69	23568.2		3499.69	-364.88
3499.78	25595.2		3499.78	-1095.88
3499.88	27727.2		3499.88	-157.88
3499.98	28273.2		3499.98	-878.88
3500.08	30687.2		3500.08	-156.88
3500.18	32656.2		3500.18	-183.88
3500.27	33082.2		3500.27	-235.88
3500.37	33743.2		3500.37	-147.88
3500.47	32901.2		3500.47	-277.88
3500.57	34849.2		3500.57	-1364.88
3500.66	37687.2		3500.66	-575.88
3500.76	37794.2		3500.76	-492.88
3500.86	38184.2		3500.86	-158.88
3500.96	40074.2		3500.96	1950.12
3501.06	41504.2		3501.06	145.12
3501.15	41821.2		3501.15	-1366.88
3501.25	43273.2		3501.25	-252.88
3501.35	44273.2		3501.35	1505.12
3501.45	45145.2		3501.45	1077.12
3501.54	46059.2		3501.54	-604.88
3501.64	46146.2		3501.64	-1082.88
3501.74	47727.2		3501.74	-1572.88
3501.84	50558.2		3501.84	-2847.88
3501.94	50966.2		3501.94	-2185.88
3502.03	51579.2		3502.03	-1505.88
3502.13	52771.2		3502.13	-646.88
3502.23	53768.2		3502.23	1236.12
3502.33	54436.2		3502.33	-538.88
3502.42	55929.2		3502.42	-947.88
3502.52	55900.2		3502.52	881.12
3502.62	56155.2		3502.62	-749.88
3502.72	58721.2		3502.72	590.12
3502.82	58620.2		3502.82	1541.12
3502.91	59815.2		3502.91	1756.12
3503.01	61329.2		3503.01	3318.12
3503.11	62219.2		3503.11	936.12
3503.21	61230.2		3503.21	944.12
3503.3	62115.2		3503.3	907.12
3503.4	63606.2		3503.4	-959.88
3503.5	63289.2		3503.5	-1026.88
3503.6	64288.2		3503.6	1548.12
3503.7	65667.2		3503.7	-574.88
3503.79	64670.2		3503.79	-2751.88
3503.89	64109.2		3503.89	-2646.88
3503.99	63827.2		3503.99	-887.88
3504.09	64539.2		3504.09	-690.88
3504.18	64564.2		3504.18	972.12
3504.28	65305.2		3504.28	611.12
3504.38	65059.2		3504.38	475.12
3504.48	64237.2		3504.48	734.12
3504.57	65396.2		3504.57	400.12
3504.67	64209.2		3504.67	1299.12
3504.77	65023.2		3504.77	790.12
3504.87	65374.2		3504.87	295.12
3504.97	64855.2		3504.97	1375.12
3505.06	64924.2		3505.06	1414.12
3505.16	65027.2		3505.16	-321.88
3505.26	65014.2		3505.26	815.12
3505.36	64111.2		3505.36	1488.12
3505.45	64468.2		3505.45	1656.12
3505.55	63719.2		3505.55	2296.12
3505.65	62711.2		3505.65	715.12
3505.75	61789.2		3505.75	488.12
3505.85	60582.2		3505.85	580.12
3505.94	58094.2		3505.94	2193.12
3506.04	55640.2		3506.04	1478.12
3506.14	52658.2		3506.14	668.12
3506.24	50994.2		3506.24	-2834.88
3506.33	49342.2		3506.33	132.12
3506.43	45100.2		3506.43	-2047.88
3506.53	44319.2		3506.53	-3027.88
3506.63	43400.2		3506.63	-2276.88
3506.73	40373.2		3506.73	-685.88
3506.82	36644.2		3506.82	1206.12
3506.92	34739.2		3506.92	193.12
3507.02	32898.2		3507.02	-1414.88
3507.12	30493.2		3507.12	-191.88
3507.21	29615.2		3507.21	330.12
3507.31	28929.2		3507.31	-274.88
3507.41	28242.2		3507.41	-425.88
3507.51	28753.2		3507.51	618.12
3507.6	28098.2		3507.6	1279.12
3507.7	28176.2		3507.7	217.12
3507.8	30320.2		3507.8	1201.12
3507.9	30599.2		3507.9	480.12
3508	31234.2		3508	1464.12
3508.09	34190.2		3508.09	565.12
3508.19	37056.2		3508.19	-289.88
3508.29	40080.2		3508.29	453.12
3508.39	44329.2		3508.39	659.12
3508.48	47116.2		3508.48	-1574.88
3508.58	50984.2		3508.58	-1012.88
3508.68	55335.2		3508.68	-604.88
3508.78	58138.2		3508.78	-1105.88
3508.88	62947.2		3508.88	-779.88
3508.97	66434.2		3508.97	-84.8799
3509.07	71053.2		3509.07	100.12
3509.17	72679.2		3509.17	144.12
3509.27	76072.2		3509.27	284.12
3509.36	78015.2		3509.36	-1712.88
3509.46	80718.2		3509.46	-2832.88
3509.56	84635.2		3509.56	-720.88
3509.66	88083.2		3509.66	-1494.88
3509.76	90681.2		3509.76	-864.88
3509.85	91745.2		3509.85	-859.88
3509.95	93018.2		3509.95	-1469.88
3510.05	93294.2		3510.05	345.12
3510.15	93571.2		3510.15	1419.12
3510.24	93400.2		3510.24	374.12
3510.34	93592.2		3510.34	-776.88
3510.44	94067.2		3510.44	-65.8799
3510.54	91735.2		3510.54	-446.88
3510.64	90737.2		3510.64	-783.88
3510.73	88226.2		3510.73	-1726.88
3510.83	87903.2		3510.83	-822.88
3510.93	86908.2		3510.93	1342.12
3511.03	83959.2		3511.03	483.12
3511.12	81695.2		3511.12	-1213.88
3511.22	77451.2		3511.22	147.12
3511.32	75462.2		3511.32	-467.88
3511.42	73396.2		3511.42	-262.88
3511.52	69959.2		3511.52	399.12
3511.61	67853.2		3511.61	1091.12
3511.71	65134.2		3511.71	960.12
3511.81	61542.2		3511.81	-1273.88
3511.91	56290.2		3511.91	-1359.88
3512	53364.2		3512	144.12
3512.1	48940.2		3512.1	619.12
3512.2	43330.2		3512.2	1282.12
3512.3	38501.2		3512.3	711.12
3512.4	33672.2		3512.4	1029.12
3512.49	28406.2		3512.49	1647.12
3512.59	25216.2		3512.59	1268.12
3512.69	20757.2		3512.69	482.12
3512.79	16418.2		3512.79	72.1201
3512.88	12082.2		3512.88	-1565.88
3512.98	9104.22		3512.98	-371.88
3513.08	5250.22		3513.08	-732.88
3513.18	2736.22		3513.18	-251.88
3513.27	-1249.78		3513.27	2510.12
3513.37	-4537.78		3513.37	318.12
3513.47	-6240.78		3513.47	1196.12
3513.57	-8617.78		3513.57	1450.12
3513.67	-10279.8		3513.67	2306.12
3513.76	-11129.8		3513.76	1241.12
3513.86	-11947.8		3513.86	1341.12
3513.96	-14733.8		3513.96	322.12
3514.06	-15768.8		3514.06	780.12
3514.15	-16034.8		3514.15	17.1201
3514.25	-16366.8		3514.25	-349.88
3514.35	-16653.8		3514.35	-965.88
3514.45	-18834.8		3514.45	2185.12
3514.55	-20303.8		3514.55	985.12
3514.64	-21358.8		3514.64	159.12
3514.74	-22271.8		3514.74	458.12
3514.84	-24690.8		3514.84	-733.88
3514.94	-24659.8		3514.94	-416.88
3515.03	-27675.8		3515.03	1542.12
3515.13	-31134.8		3515.13	877.12
3515.23	-33871.8		3515.23	1945.12
3515.33	-37157.8		3515.33	942.12
3515.43	-40439.8		3515.43	12.1201
3515.52	-44740.8		3515.52	-2816.88
3515.62	-48168.8		3515.62	-1567.88
3515.72	-53355.8		3515.72	895.12
3515.82	-57668.8		3515.82	-26.8799
3515.91	-62442.8		3515.91	960.12
3516.01	-67548.8		3516.01	208.12
3516.11	-71252.8		3516.11	1166.12
3516.21	-76974.8		3516.21	-14.8789
3516.3	-80926.8		3516.3	1067.16
3516.4	-84757.8		3516.4	650.2
3516.5	-87718.8		3516.5	2149.16
3516.6	-90979.8		3516.6	1833.14
3516.7	-94217.8		3516.7	310.133
3516.79	-96958.8		3516.79	-292.875
3516.89	-96877.8		3516.89	685.117
3516.99	-98047.8		3516.99	1401.11
3517.09	-97321.8		3517.09	-446.902
3517.18	-95847.8		3517.18	-466.919
3517.28	-95936.8		3517.28	1330.04
3517.38	-94363.8		3517.38	202.074
3517.48	-93196.8		3517.48	-929.882
3517.58	-90763.8		3517.58	-670.88
3517.67	-87498.8		3517.67	-1071.88
3517.77	-84745.8		3517.77	-482.88
3517.87	-80627.8		3517.87	982.12
3517.97	-75296.8		3517.97	126.12
3518.06	-70648.8		3518.06	776.12
3518.16	-66390.8		3518.16	1789.12
3518.26	-61682.8		3518.26	525.12
3518.36	-57785.8		3518.36	-1804.88
3518.46	-52220.8		3518.46	451.12
3518.55	-48358.8		3518.55	2109.12
3518.65	-45229.8		3518.65	1400.12
3518.75	-39941.8		3518.75	842.12
3518.85	-37220.8		3518.85	120.12
3518.94	-34921.8		3518.94	-284.88
3519.04	-30711.8		3519.04	-161.88
3519.14	-26257.8		3519.14	123.12
3519.24	-24582.8		3519.24	697.12
3519.34	-23227.8		3519.34	142.12
3519.43	-21271.8		3519.43	260.12
3519.53	-20437.8		3519.53	867.12
3519.63	-20677.8		3519.63	1441.12
3519.73	-19203.8		3519.73	180.12
3519.82	-18152.8		3519.82	-145.88
3519.92	-17528.8		3519.92	129.12
3520.02	-18605.8		3520.02	-1244.88
3520.12	-18918.8		3520.12	-1244.88
3520.22	-22525.8		3520.22	-1076.88
3520.31	-23936.8		3520.31	551.12
3520.41	-25813.8		3520.41	-747.88
3520.51	-27859.8		3520.51	953.12
3520.61	-29930.8		3520.61	376.12
3520.7	-33025.8		3520.7	-29.8799
3520.8	-35375.8		3520.8	153.12
3520.9	-35891.8		3520.9	1288.12
3521	-38218.8		3521	122.12
3521.09	-39674.8		3521.09	-914.88
3521.19	-41917.8		3521.19	-575.88
3521.29	-46051.8		3521.29	508.12
3521.39	-48480.8		3521.39	1564.12
3521.49	-51088.8		3521.49	796.12
3521.58	-52553.8		3521.58	-474.88
3521.68	-54117.8		3521.68	-668.88
3521.78	-56431.8		3521.78	196.12
3521.88	-59543.8		3521.88	-1129.88
3521.97	-61802.8		3521.97	-641.88
3522.07	-64241.8		3522.07	-608.88
3522.17	-65531.8		3522.17	-444.88
3522.27	-67041.8		3522.27	-1192.88
3522.37	-69801.8		3522.37	-717.88
3522.46	-70681.8		3522.46	-1616.88
3522.56	-71609.8		3522.56	2105.12
3522.66	-73798.8		3522.66	2296.12
3522.76	-76697.8		3522.76	-221.88
3522.85	-78470.8		3522.85	-1369.88
3522.95	-79489.8		3522.95	-899.88
3523.05	-79093.8		3523.05	-616.88
3523.15	-80946.8		3523.15	101.12
3523.25	-81534.8		3523.25	858.12
3523.34	-80852.8		3523.34	903.12
3523.44	-82355.8		3523.44	-939.88
3523.54	-82994.8		3523.54	-1235.88
3523.64	-82773.8		3523.64	-1957.88
3523.73	-82297.8		3523.73	-1179.88
3523.83	-80730.8		3523.83	-229.88
3523.93	-78524.8		3523.93	-473.88
3524.03	-77218.8		3524.03	-429.88
3524.13	-74977.8		3524.13	-415.88
3524.22	-74318.8		3524.22	196.12
3524.32	-71936.8		3524.32	82.1201
3524.42	-70942.8		3524.42	-519.88
3524.52	-69332.8		3524.52	-127.88
3524.61	-67366.8		3524.61	-747.88
3524.71	-65958.8		3524.71	-1315.88
3524.81	-63854.8		3524.81	372.12
3524.91	-62980.8		3524.91	-855.88
3525	-61830.8		3525	-893.88
3525.1	-59049.8		3525.1	-2437.88
3525.2	-56608.8		3525.2	-655.88
3525.3	-54056.8		3525.3	145.12
3525.4	-51744.8		3525.4	-1061.88
3525.49	-49795.8		3525.49	-2314.88
3525.59	-47372.8		3525.59	-1558.88
3525.69	-47635.8		3525.69	-1397.88
3525.79	-45458.8		3525.79	-1802.88
3525.88	-44267.8		3525.88	-1714.88
3525.98	-43009.8		3525.98	-2137.88
3526.08	-39784.8		3526.08	-1033.88
3526.18	-36937.8		3526.18	-933.88
3526.28	-36722.8		3526.28	-1558.88
3526.37	-36706.8		3526.37	1793.12
3526.47	-35100.8		3526.47	2271.12
3526.57	-32708.8		3526.57	1157.12
3526.67	-31876.8		3526.67	1711.12
3526.76	-30228.8		3526.76	1340.12
3526.86	-29313.8		3526.86	-164.88
3526.96	-28879.8		3526.96	-655.88
3527.06	-27907.8		3527.06	1712.12
3527.16	-26846.8		3527.16	-335.88
3527.25	-25957.8		3527.25	-597.88
3527.35	-23927.8		3527.35	204.12
3527.45	-22086.8		3527.45	-352.88
3527.55	-21947.8		3527.55	655.12
3527.64	-21790.8		3527.64	-1252.88
3527.74	-20982.8		3527.74	233.12
3527.84	-19607.8		3527.84	2122.12
3527.94	-19965.8		3527.94	206.12
3528.04	-19206.8		3528.04	854.12
3528.13	-18680.8		3528.13	1699.12
3528.23	-18114.8		3528.23	1470.12
3528.33	-17319.8		3528.33	495.12
3528.43	-16639.8		3528.43	274.12
3528.52	-16890.8		3528.52	-1903.88
3528.62	-15356.8		3528.62	-1166.88
3528.72	-14551.8		3528.72	-958.88
3528.82	-15064.8		3528.82	-123.88
3528.92	-14647.8		3528.92	-1417.88
3529.01	-13926.8		3529.01	-2263.88
3529.11	-13232.8		3529.11	-1902.88
3529.21	-12829.8		3529.21	-1302.88
3529.31	-13128.8		3529.31	-2.87988
3529.4	-12259.8		3529.4	339.12
3529.5	-12116.8		3529.5	-1315.88
3529.6	-12150.8		3529.6	-1982.88
3529.7	-10219.8		3529.7	773.12
3529.79	-10963.8		3529.79	990.12
3529.89	-10528.8		3529.89	-634.88
3529.99	-9340.78		3529.99	-1731.88
3530.09	-9589.78		3530.09	-1568.88
3530.19	-7986.78		3530.19	869.12
3530.28	-7425.78		3530.28	1000.12
3530.38	-8634.78		3530.38	1510.12
3530.48	-7745.78		3530.48	482.12
3530.58	-7112.78		3530.58	710.12
3530.67	-7004.78		3530.67	-651.88
3530.77	-6887.78		3530.77	-202.88
3530.87	-6781.78		3530.87	-621.88
3530.97	-6302.78		3530.97	1085.12
3531.07	-4909.78		3531.07	223.12
3531.16	-6102.78		3531.16	2964.12
3531.26	-6504.78		3531.26	2617.12
3531.36	-5339.78		3531.36	1409.12
3531.46	-5795.78		3531.46	1428.12
3531.55	-5382.78		3531.55	-104.88
3531.65	-5090.78		3531.65	24.1201
3531.75	-4775.78		3531.75	856.12
3531.85	-5615.78		3531.85	476.12
3531.95	-4961.78		3531.95	-665.88
3532.04	-4313.78		3532.04	-409.88
3532.14	-5197.78		3532.14	-1478.88
3532.24	-3803.78		3532.24	-1096.88
3532.34	-3477.78		3532.34	-592.88
3532.43	-3116.78		3532.43	-245.88
3532.53	-2632.78		3532.53	-1214.88
3532.63	-3753.78		3532.63	-16.8799
3532.73	-3920.78		3532.73	-509.88
3532.82	-3355.78		3532.82	457.12
3532.92	-3553.78		3532.92	719.12
3533.02	-4417.78		3533.02	1324.12
3533.12	-2849.78		3533.12	38.1201
3533.22	-3333.78		3533.22	-761.88
3533.31	-2865.78		3533.31	-798.88
3533.41	-2487.78		3533.41	1087.12
3533.51	-3297.78		3533.51	535.12
3533.61	-4577.78		3533.61	-802.88
3533.7	-5246.78		3533.7	-1040.88
3533.8	-4389.78		3533.8	-465.88
3533.9	-3144.78		3533.9	-1467.88
3534	-3367.78		3534	-1138.88
3534.1	-4225.78		3534.1	2154.12
3534.19	-3220.78		3534.19	883.12
3534.29	-3193.78		3534.29	998.12
3534.39	-3500.78		3534.39	-827.88
3534.49	-3569.78		3534.49	728.12
3534.58	-2179.78		3534.58	874.12
3534.68	-2373.78		3534.68	-44.8799
3534.78	-2271.78		3534.78	214.12
3534.88	-2738.78		3534.88	-736.88
3534.98	-2752.78		3534.98	-1453.88
3535.07	-3491.78		3535.07	-1159.88
3535.17	-2802.78		3535.17	351.12
3535.27	-2511.78		3535.27	-247.88
3535.37	-953.781		3535.37	-285.88
3535.46	-2272.78		3535.46	749.12
3535.56	-2304.78		3535.56	-588.88
3535.66	-3015.78		3535.66	-1151.88
3535.76	-1501.78		3535.76	788.12
3535.86	-2127.78		3535.86	-1585.88
3535.95	-2190.78		3535.95	-1519.88
3536.05	-2016.78		3536.05	-1897.88
3536.15	-1657.78		3536.15	-763.88
3536.25	-1275.78		3536.25	-127.88
3536.34	-934.781		3536.34	1003.12
3536.44	-2437.78		3536.44	935.12
3536.54	-2017.78		3536.54	381.12
3536.64	-2446.78		3536.64	-1564.88
3536.74	-990.781		3536.74	-730.88
3536.83	-984.781		3536.83	133.12
3536.93	-1938.78		3536.93	3059.12
3537.03	-3310.78		3537.03	1248.12
3537.13	-2730.78		3537.13	-5.87988
3537.22	-1565.78		3537.22	694.12
3537.32	-1018.78		3537.32	643.12
3537.42	-3361.78		3537.42	-493.88
3537.52	-3216.78		3537.52	-749.88
3537.61	-2486.78		3537.61	-1532.88
3537.71	-1622.78		3537.71	-84.8799
3537.81	-1822.78		3537.81	165.12
3537.91	-2366.78		3537.91	-91.8799
3538.01	-4000.78		3538.01	-460.88
3538.1	-2866.78		3538.1	814.12
3538.2	-2617.78		3538.2	-798.88
3538.3	-2109.78		3538.3	-333.88
3538.4	-1231.78		3538.4	-1026.88
3538.49	-576.781		3538.49	-336.88
3538.59	-616.781		3538.59	789.12
3538.69	-1114.78		3538.69	-67.8799
3538.79	381.219		3538.79	253.12
3538.89	-1198.78		3538.89	-41.8799
3538.98	-1289.78		3538.98	-1550.88
3539.08	-1030.78		3539.08	-1566.88
3539.18	-1784.78		3539.18	-1617.88
3539.28	-1258.78		3539.28	-491.88
3539.37	-2395.78		3539.37	1556.12
3539.47	-1657.78		3539.47	215.12
3539.57	-326.781		3539.57	-853.88
3539.67	-690.781		3539.67	-404.88
3539.77	-1221.78		3539.77	-26.8799
3539.86	-164.781		3539.86	-895.88
3539.96	-216.781		3539.96	-744.88
3540.06	-1846.78		3540.06	-573.88
3540.16	-2983.78		3540.16	-2157.88
3540.25	-1617.78		3540.25	126.12
3540.35	-1348.78		3540.35	563.12
3540.45	-1591.78		3540.45	-976.88
3540.55	-2002.78		3540.55	-54.8799
3540.65	-1187.78		3540.65	275.12
3540.74	-2291.78		3540.74	725.12
3540.84	-3768.78		3540.84	633.12
3540.94	-2571.78		3540.94	-42.8799
3541.04	-3232.78		3541.04	293.12
3541.13	-2624.78		3541.13	-981.88
3541.23	-974.781		3541.23	-404.88
3541.33	-720.781		3541.33	422.12
3541.43	-678.781		3541.43	-411.88
3541.52	-2403.78		3541.52	-2512.88
3541.62	-2607.78		3541.62	-1458.88
3541.72	-1788.78		3541.72	-1536.88
3541.82	-3027.78		3541.82	-1588.88
3541.92	-2572.78		3541.92	-2345.88
3542.01	-993.781		3542.01	-1802.88
3542.11	-2830.78		3542.11	-1754.88
3542.21	-2973.78		3542.21	-3548.88
3542.31	-1859.78		3542.31	-608.88
3542.4	-1437.78		3542.4	-796.88
3542.5	-1246.78		3542.5	-1739.88
3542.6	-1784.78		3542.6	128.12
3542.7	-3516.78		3542.7	-605.88
3542.8	-3292.78		3542.8	-488.88
3542.89	-2276.78		3542.89	72.1201
3542.99	-1907.78		3542.99	-342.88
3543.09	-936.781		3543.09	1271.12
3543.19	-1785.78		3543.19	840.12
3543.28	-2428.78		3543.28	-1333.88
3543.38	-2531.78		3543.38	-1385.88
3543.48	-2000.78		3543.48	-1361.88
3543.58	-2159.78		3543.58	-1642.88
3543.68	-3443.78		3543.68	1287.12
3543.77	-3683.78		3543.77	3382.12
3543.87	-2214.78		3543.87	1457.12
3543.97	-2633.78		3543.97	-1211.88
3544.07	-1732.78		3544.07	-2777.88
3544.16	-1407.78		3544.16	-2085.88
3544.26	-509.781		3544.26	-1247.88
3544.36	-1654.78		3544.36	1184.12
3544.46	-3728.78		3544.46	1431.12
3544.56	-2608.78		3544.56	-743.88
3544.65	-2331.78		3544.65	-2086.88
3544.75	-2636.78		3544.75	-1090.88
3544.85	-2641.78		3544.85	-1374.88
3544.95	-3326.78		3544.95	-1486.88
3545.04	-2523.78		3545.04	-386.88
3545.14	-1769.78		3545.14	606.12
3545.24	-2700.78		3545.24	1541.12
3545.34	-3282.78		3545.34	-361.88
3545.44	-2985.78		3545.44	-92.8799
3545.53	-2576.78		3545.53	-312.88
3545.63	-1207.78		3545.63	-325.88
3545.73	-1828.78		3545.73	2222.12
3545.83	-1751.78		3545.83	1159.12
3545.92	-1436.78		3545.92	-207.88
3546.02	-1773.78		3546.02	556.12
3546.12	-2291.78		3546.12	763.12
3546.22	-2764.78		3546.22	287.12
3546.31	-2205.78		3546.31	999.12
3546.41	-2081.78		3546.41	409.12
3546.51	-2232.78		3546.51	-694.88
3546.61	-1926.78		3546.61	939.12
3546.71	-1926.78		3546.71	12.1201
3546.8	-1280.78		3546.8	1011.12
3546.9	-651.781		3546.9	582.12
3547	-1269.78		3547	574.12
3547.1	-3072.78		3547.1	3.12012
3547.19	-3211.78		3547.19	-431.88
3547.29	-3018.78		3547.29	-69.8799
3547.39	-1580.78		3547.39	466.12
3547.49	-1904.78		3547.49	-443.88
3547.59	-2586.78		3547.59	-754.88
3547.68	-2279.78		3547.68	452.12
3547.78	-2758.78		3547.78	949.12
3547.88	-2143.78		3547.88	-881.88
3547.98	-1311.78		3547.98	-1181.88
3548.07	-1711.78		3548.07	-1317.88
3548.17	-2570.78		3548.17	-654.88
3548.27	-2177.78		3548.27	1767.12
3548.37	-1206.78		3548.37	1164.12
3548.47	-1298.78		3548.47	-346.88
3548.56	-1156.78		3548.56	-527.88
3548.66	-1111.78		3548.66	166.12
3548.76	-1129.78		3548.76	532.12
3548.86	200.219		3548.86	-450.88
3548.95	-1071.78		3548.95	-808.88
3549.05	-2578.78		3549.05	-790.88
3549.15	-3333.78		3549.15	-1148.88
3549.25	-3589.78		3549.25	-1748.88
3549.34	-1023.78		3549.34	-460.88
3549.44	-1979.78		3549.44	-642.88
3549.54	-2532.78		3549.54	-625.88
3549.64	-1450.78		3549.64	-942.88
3549.74	-1646.78		3549.74	-2733.88
3549.83	-3139.78		3549.83	-2994.88
3549.93	-3078.78		3549.93	1799.12
3550.03	-3351.78		3550.03	1531.12
3550.13	-2529.78		3550.13	-1167.88
3550.22	-2663.78		3550.22	-1305.88
3550.32	-1751.78		3550.32	256.12
3550.42	-2022.78		3550.42	1906.12
3550.52	-2189.78		3550.52	-39.8799
3550.62	-2107.78		3550.62	298.12
3550.71	-1766.78		3550.71	-1098.88
3550.81	-1276.78		3550.81	630.12
3550.91	-2534.78		3550.91	1492.12
3551.01	-2309.78		3551.01	171.12
3551.1	-292.781		3551.1	-399.88
3551.2	-300.781		3551.2	-1480.88
3551.3	-2140.78		3551.3	-2491.88
3551.4	-2728.78		3551.4	-804.88
3551.5	-1879.78		3551.5	188.12
3551.59	-3071.78		3551.59	1836.12
3551.69	-3281.78		3551.69	-1072.88
3551.79	-3024.78		3551.79	-1551.88
3551.89	-1897.78		3551.89	447.12
3551.98	-850.781		3551.98	1558.12
3552.08	-1130.78		3552.08	319.12
3552.18	-1405.78		3552.18	-1470.88
3552.28	-1727.78		3552.28	986.12
3552.38	-1447.78		3552.38	1789.12
3552.47	-2074.78		3552.47	-407.88
3552.57	-2356.78		3552.57	-391.88
3552.67	-2173.78		3552.67	-1202.88
3552.77	-1999.78		3552.77	-2184.88
3552.86	-2941.78		3552.86	48.1201
3552.96	-2376.78		3552.96	106.12
3553.06	-2146.78		3553.06	-257.88
3553.16	-2467.78		3553.16	-687.88
3553.26	-2616.78		3553.26	-2419.88
3553.35	-3447.78		3553.35	-66.8799
3553.45	-2946.78		3553.45	1552.12
3553.55	-1868.78		3553.55	-183.88
3553.65	-2005.78		3553.65	149.12
3553.74	-1939.78		3553.74	727.12
3553.84	-1646.78		3553.84	1731.12
3553.94	-1376.78		3553.94	-1273.88
3554.04	-832.781		3554.04	-1223.88
3554.14	-1778.78		3554.14	-1863.88
3554.23	-1922.78		3554.23	-1323.88
3554.33	-1551.78		3554.33	-1975.88
3554.43	-2435.78		3554.43	-2646.88
3554.53	-2829.78		3554.53	-946.88
3554.62	-1608.78		3554.62	-1847.88
3554.72	-1304.78		3554.72	-2755.88
3554.82	-2067.78		3554.82	-1217.88
3554.92	-1282.78		3554.92	-571.88
3555.01	-458.781		3555.01	562.12
3555.11	-627.781		3555.11	-236.88
3555.21	-579.781		3555.21	1893.12
3555.31	-900.781		3555.31	826.12
3555.41	-1636.78		3555.41	-1243.88
3555.5	-1849.78		3555.5	-355.88
3555.6	-2713.78		3555.6	415.12
3555.7	-1803.78		3555.7	-537.88
3555.8	-1815.78		3555.8	905.12
3555.89	-1708.78		3555.89	2458.12
3555.99	-1639.78		3555.99	1981.12
3556.09	-3264.78		3556.09	1295.12
3556.19	-2643.78		3556.19	-278.88
3556.29	-2197.78		3556.29	-705.88
3556.38	-2042.78		3556.38	346.12
3556.48	-2079.78		3556.48	-579.88
3556.58	-527.781		3556.58	-399.88
3556.68	-1478.78		3556.68	-1371.88
3556.77	-1346.78		3556.77	719.12
3556.87	-1925.78		3556.87	-719.88
3556.97	-1511.78		3556.97	-221.88
3557.07	-1167.78		3557.07	-756.88
3557.17	-1725.78		3557.17	-607.88
3557.26	-2101.78		3557.26	-699.88
3557.36	-1159.78		3557.36	347.12
3557.46	550.219		3557.46	-278.88
3557.56	-817.781		3557.56	-1026.88
3557.65	-1412.78		3557.65	-1969.88
3557.75	-3566.78		3557.75	-2220.88
3557.85	-2284.78		3557.85	-558.88
3557.95	-1402.78		3557.95	-1834.88
3558.04	-1919.78		3558.04	-2763.88
3558.14	-1153.78		3558.14	-892.88
3558.24	-1557.78		3558.24	-1363.88
3558.34	-2314.78		3558.34	938.12
3558.44	-1541.78		3558.44	702.12
3558.53	74.2188		3558.53	-476.88
3558.63	-236.781		3558.63	-2380.88
3558.73	373.219		3558.73	-1323.88
3558.83	-1418.78		3558.83	-173.88
3558.92	-1780.78		3558.92	757.12
3559.02	-1490.78		3559.02	-202.88
3559.12	-1767.78		3559.12	2058.12
3559.22	-2269.78		3559.22	-664.88
3559.32	-1773.78		3559.32	-1945.88
3559.41	-1670.78		3559.41	3.12012
3559.51	-1439.78		3559.51	321.12
3559.61	-1775.78		3559.61	-641.88
3559.71	-2154.78		3559.71	-68.8799
3559.8	-1180.78		3559.8	-779.88
3559.9	-1534.78		3559.9	-2161.88
3560	-2447.78		3560	-2939.88

## Sheet: Figure 5d
0 second		60 seconds		heating 1 hour
X	Y	X	Y	X	Y
200.134	0.019	200.134	-0.017	200.134	0.03
200.557	0.01	200.557	-0.017	200.557	0.023
200.98	0.006	200.98	-0.021	200.98	0.016
201.403	-0.001	201.403	-0.013	201.403	0.018
201.826	-0.005	201.826	-0.004	201.826	0
202.249	-0.007	202.249	-0.002	202.249	-0.005
202.673	-0.01	202.673	-0.002	202.673	0.008
203.096	-0.018	203.096	-0.007	203.096	0.018
203.519	-0.019	203.519	-0.004	203.519	0.025
203.943	-0.007	203.943	0	203.943	0.025
204.366	-0.001	204.366	0.003	204.366	0.026
204.79	0.004	204.79	0.014	204.79	0.029
205.213	0.02	205.213	0.019	205.213	0.023
205.637	0.025	205.637	0.017	205.637	0.013
206.061	0.019	206.061	0.012	206.061	0.008
206.484	0.02	206.484	0.006	206.484	0.011
206.908	0.029	206.908	0.011	206.908	0.014
207.332	0.032	207.332	0.04	207.332	0.011
207.756	0.039	207.756	0.067	207.756	0.001
208.18	0.034	208.18	0.08	208.18	-0.012
208.604	0.021	208.604	0.09	208.604	-0.017
209.028	0.014	209.028	0.103	209.028	-0.024
209.452	0.008	209.452	0.105	209.452	-0.026
209.876	-0.003	209.876	0.12	209.876	-0.019
210.3	-0.003	210.3	0.133	210.3	-0.005
210.724	-0.001	210.724	0.132	210.724	0.001
211.148	-0.014	211.148	0.126	211.148	0.001
211.572	-0.025	211.572	0.108	211.572	0.004
211.997	-0.021	211.997	0.078	211.997	0.009
212.421	-0.01	212.421	0.054	212.421	0.02
212.845	0	212.845	0.04	212.845	0.034
213.27	0.007	213.27	0.036	213.27	0.053
213.694	0.013	213.694	0.019	213.694	0.066
214.119	0.018	214.119	0.011	214.119	0.078
214.543	0.028	214.543	0.004	214.543	0.076
214.968	0.016	214.968	0.005	214.968	0.063
215.392	0.021	215.392	0.007	215.392	0.06
215.817	0.031	215.817	0.031	215.817	0.053
216.242	0.045	216.242	0.04	216.242	0.047
216.667	0.05	216.667	0.052	216.667	0.04
217.091	0.044	217.091	0.074	217.091	0.03
217.516	0.031	217.516	0.088	217.516	0.026
217.941	0.023	217.941	0.083	217.941	0.02
218.366	0.013	218.366	0.078	218.366	0.008
218.791	0.001	218.791	0.082	218.791	-0.002
219.216	-0.001	219.216	0.078	219.216	-0.001
219.641	0.002	219.641	0.07	219.641	0.002
220.066	0.008	220.066	0.061	220.066	-0.006
220.492	0.015	220.492	0.044	220.492	-0.004
220.917	0.007	220.917	0.034	220.917	0.002
221.342	0.005	221.342	0.023	221.342	-0.002
221.767	0.012	221.767	0.011	221.767	-0.001
222.193	0.022	222.193	0	222.193	-0.008
222.618	0.031	222.618	0.001	222.618	-0.012
223.044	0.051	223.044	0.009	223.044	-0.01
223.469	0.067	223.469	0.004	223.469	-0.003
223.895	0.061	223.895	0.002	223.895	-0.002
224.32	0.06	224.32	0.004	224.32	0.001
224.746	0.058	224.746	0.001	224.746	0.009
225.171	0.059	225.171	0.002	225.171	0.013
225.597	0.066	225.597	0.002	225.597	0.013
226.023	0.071	226.023	0.002	226.023	0.015
226.449	0.081	226.449	0.006	226.449	0.021
226.874	0.093	226.874	0.007	226.874	0.027
227.3	0.092	227.3	0.007	227.3	0.032
227.726	0.085	227.726	0.013	227.726	0.033
228.152	0.078	228.152	0.022	228.152	0.033
228.578	0.083	228.578	0.024	228.578	0.039
229.004	0.089	229.004	0.025	229.004	0.035
229.43	0.087	229.43	0.027	229.43	0.032
229.856	0.09	229.856	0.037	229.856	0.028
230.283	0.089	230.283	0.04	230.283	0.033
230.709	0.084	230.709	0.043	230.709	0.031
231.135	0.076	231.135	0.045	231.135	0.035
231.561	0.072	231.561	0.052	231.561	0.038
231.988	0.077	231.988	0.059	231.988	0.039
232.414	0.084	232.414	0.051	232.414	0.036
232.841	0.097	232.841	0.04	232.841	0.034
233.267	0.1	233.267	0.033	233.267	0.03
233.694	0.099	233.694	0.031	233.694	0.03
234.12	0.099	234.12	0.029	234.12	0.033
234.547	0.09	234.547	0.025	234.547	0.033
234.974	0.084	234.974	0.024	234.974	0.032
235.4	0.085	235.4	0.024	235.4	0.032
235.827	0.081	235.827	0.017	235.827	0.031
236.254	0.08	236.254	0.008	236.254	0.03
236.681	0.083	236.681	0.001	236.681	0.038
237.108	0.076	237.108	-0.002	237.108	0.046
237.535	0.068	237.535	0.003	237.535	0.047
237.962	0.068	237.962	0.006	237.962	0.05
238.389	0.068	238.389	0.006	238.389	0.051
238.816	0.072	238.816	0.005	238.816	0.05
239.243	0.07	239.243	0.003	239.243	0.056
239.67	0.068	239.67	0.002	239.67	0.058
240.097	0.061	240.097	0	240.097	0.06
240.524	0.061	240.524	0	240.524	0.063
240.952	0.057	240.952	0.001	240.952	0.062
241.379	0.05	241.379	-0.001	241.379	0.058
241.806	0.049	241.806	-0.002	241.806	0.056
242.234	0.05	242.234	-0.004	242.234	0.058
242.661	0.053	242.661	-0.006	242.661	0.055
243.089	0.058	243.089	-0.003	243.089	0.051
243.516	0.058	243.516	0	243.516	0.052
243.944	0.057	243.944	0	243.944	0.053
244.372	0.064	244.372	0.002	244.372	0.054
244.799	0.07	244.799	0.008	244.799	0.051
245.227	0.071	245.227	0.013	245.227	0.047
245.655	0.074	245.655	0.013	245.655	0.047
246.082	0.073	246.082	0.012	246.082	0.047
246.51	0.07	246.51	0.014	246.51	0.053
246.938	0.065	246.938	0.016	246.938	0.054
247.366	0.054	247.366	0.021	247.366	0.061
247.794	0.044	247.794	0.017	247.794	0.066
248.222	0.04	248.222	0.02	248.222	0.072
248.65	0.043	248.65	0.02	248.65	0.074
249.078	0.045	249.078	0.019	249.078	0.073
249.507	0.046	249.507	0.017	249.507	0.074
249.935	0.047	249.935	0.013	249.935	0.081
250.363	0.046	250.363	0.012	250.363	0.083
250.791	0.047	250.791	0.015	250.791	0.081
251.22	0.047	251.22	0.018	251.22	0.076
251.648	0.05	251.648	0.017	251.648	0.071
252.076	0.056	252.076	0.014	252.076	0.07
252.505	0.057	252.505	0.013	252.505	0.07
252.933	0.058	252.933	0.015	252.933	0.07
253.362	0.063	253.362	0.02	253.362	0.069
253.791	0.058	253.791	0.024	253.791	0.075
254.219	0.054	254.219	0.021	254.219	0.08
254.648	0.057	254.648	0.025	254.648	0.076
255.077	0.052	255.077	0.026	255.077	0.069
255.505	0.05	255.505	0.028	255.505	0.06
255.934	0.05	255.934	0.028	255.934	0.059
256.363	0.041	256.363	0.031	256.363	0.063
256.792	0.037	256.792	0.031	256.792	0.061
257.221	0.039	257.221	0.033	257.221	0.06
257.65	0.037	257.65	0.033	257.65	0.057
258.079	0.029	258.079	0.032	258.079	0.055
258.508	0.032	258.508	0.032	258.508	0.05
258.937	0.035	258.937	0.034	258.937	0.048
259.366	0.032	259.366	0.032	259.366	0.05
259.796	0.033	259.796	0.032	259.796	0.056
260.225	0.035	260.225	0.032	260.225	0.066
260.654	0.044	260.654	0.029	260.654	0.07
261.083	0.055	261.083	0.026	261.083	0.067
261.513	0.055	261.513	0.026	261.513	0.063
261.942	0.057	261.942	0.025	261.942	0.06
262.372	0.064	262.372	0.021	262.372	0.057
262.801	0.066	262.801	0.019	262.801	0.055
263.231	0.063	263.231	0.018	263.231	0.057
263.66	0.06	263.66	0.018	263.66	0.057
264.09	0.063	264.09	0.018	264.09	0.058
264.52	0.065	264.52	0.018	264.52	0.056
264.949	0.066	264.949	0.02	264.949	0.05
265.379	0.058	265.379	0.023	265.379	0.049
265.809	0.05	265.809	0.022	265.809	0.049
266.239	0.053	266.239	0.025	266.239	0.052
266.669	0.048	266.669	0.024	266.669	0.054
267.099	0.051	267.099	0.027	267.099	0.058
267.529	0.049	267.529	0.025	267.529	0.06
267.959	0.048	267.959	0.022	267.959	0.057
268.389	0.047	268.389	0.022	268.389	0.054
268.819	0.043	268.819	0.024	268.819	0.049
269.249	0.041	269.249	0.026	269.249	0.049
269.679	0.04	269.679	0.025	269.679	0.052
270.11	0.039	270.11	0.023	270.11	0.054
270.54	0.04	270.54	0.022	270.54	0.053
270.97	0.041	270.97	0.022	270.97	0.049
271.401	0.036	271.401	0.022	271.401	0.048
271.831	0.026	271.831	0.021	271.831	0.047
272.261	0.023	272.261	0.02	272.261	0.045
272.692	0.026	272.692	0.019	272.692	0.045
273.122	0.028	273.122	0.018	273.122	0.045
273.553	0.029	273.553	0.017	273.553	0.049
273.984	0.028	273.984	0.015	273.984	0.047
274.414	0.028	274.414	0.015	274.414	0.043
274.845	0.028	274.845	0.014	274.845	0.041
275.276	0.032	275.276	0.015	275.276	0.04
275.707	0.034	275.707	0.015	275.707	0.042
276.138	0.041	276.138	0.016	276.138	0.043
276.568	0.048	276.568	0.013	276.568	0.04
276.999	0.047	276.999	0.016	276.999	0.041
277.43	0.043	277.43	0.02	277.43	0.043
277.861	0.039	277.861	0.02	277.861	0.044
278.292	0.039	278.292	0.021	278.292	0.042
278.724	0.04	278.724	0.023	278.724	0.041
279.155	0.038	279.155	0.024	279.155	0.044
279.586	0.036	279.586	0.025	279.586	0.044
280.017	0.034	280.017	0.027	280.017	0.042
280.448	0.029	280.448	0.024	280.448	0.041
280.88	0.025	280.88	0.024	280.88	0.042
281.311	0.022	281.311	0.026	281.311	0.043
281.743	0.02	281.743	0.024	281.743	0.042
282.174	0.02	282.174	0.021	282.174	0.042
282.605	0.021	282.605	0.021	282.605	0.042
283.037	0.02	283.037	0.021	283.037	0.041
283.469	0.018	283.469	0.017	283.469	0.043
283.9	0.018	283.9	0.018	283.9	0.041
284.332	0.018	284.332	0.019	284.332	0.04
284.764	0.018	284.764	0.018	284.764	0.042
285.195	0.02	285.195	0.02	285.195	0.041
285.627	0.019	285.627	0.02	285.627	0.04
286.059	0.018	286.059	0.019	286.059	0.037
286.491	0.021	286.491	0.02	286.491	0.037
286.923	0.022	286.923	0.02	286.923	0.038
287.355	0.022	287.355	0.019	287.355	0.037
287.787	0.024	287.787	0.017	287.787	0.039
288.219	0.024	288.219	0.017	288.219	0.041
288.651	0.024	288.651	0.018	288.651	0.042
289.083	0.022	289.083	0.017	289.083	0.04
289.515	0.022	289.515	0.016	289.515	0.039
289.947	0.022	289.947	0.016	289.947	0.039
290.38	0.022	290.38	0.016	290.38	0.042
290.812	0.021	290.812	0.017	290.812	0.045
291.244	0.02	291.244	0.016	291.244	0.046
291.677	0.021	291.677	0.015	291.677	0.046
292.109	0.019	292.109	0.016	292.109	0.046
292.542	0.017	292.542	0.017	292.542	0.044
292.974	0.018	292.974	0.018	292.974	0.042
293.407	0.016	293.407	0.018	293.407	0.043
293.839	0.017	293.839	0.017	293.839	0.046
294.272	0.018	294.272	0.016	294.272	0.048
294.705	0.018	294.705	0.016	294.705	0.049
295.138	0.019	295.138	0.016	295.138	0.049
295.57	0.021	295.57	0.016	295.57	0.046
296.003	0.02	296.003	0.015	296.003	0.044
296.436	0.021	296.436	0.016	296.436	0.043
296.869	0.025	296.869	0.016	296.869	0.043
297.302	0.027	297.302	0.017	297.302	0.045
297.735	0.026	297.735	0.018	297.735	0.043
298.168	0.028	298.168	0.017	298.168	0.04
298.601	0.029	298.601	0.017	298.601	0.038
299.034	0.028	299.034	0.017	299.034	0.037
299.467	0.027	299.467	0.017	299.467	0.036
299.9	0.028	299.9	0.018	299.9	0.035
300.334	0.028	300.334	0.019	300.334	0.036
300.767	0.03	300.767	0.019	300.767	0.038
301.2	0.029	301.2	0.02	301.2	0.036
301.634	0.028	301.634	0.019	301.634	0.034
302.067	0.029	302.067	0.019	302.067	0.033
302.501	0.031	302.501	0.017	302.501	0.034
302.934	0.03	302.934	0.016	302.934	0.035
303.368	0.03	303.368	0.017	303.368	0.037
303.801	0.031	303.801	0.018	303.801	0.039
304.235	0.03	304.235	0.019	304.235	0.04
304.669	0.029	304.669	0.017	304.669	0.041
305.102	0.027	305.102	0.015	305.102	0.039
305.536	0.026	305.536	0.016	305.536	0.037
305.97	0.023	305.97	0.016	305.97	0.036
306.404	0.021	306.404	0.015	306.404	0.038
306.838	0.02	306.838	0.015	306.838	0.038
307.272	0.02	307.272	0.015	307.272	0.037
307.705	0.021	307.705	0.016	307.705	0.036
308.14	0.02	308.14	0.015	308.14	0.032
308.574	0.02	308.574	0.014	308.574	0.03
309.008	0.02	309.008	0.015	309.008	0.029
309.442	0.022	309.442	0.016	309.442	0.029
309.876	0.023	309.876	0.016	309.876	0.029
310.31	0.022	310.31	0.015	310.31	0.03
310.744	0.023	310.744	0.015	310.744	0.03
311.179	0.022	311.179	0.015	311.179	0.03
311.613	0.02	311.613	0.014	311.613	0.03
312.048	0.017	312.048	0.013	312.048	0.03
312.482	0.016	312.482	0.013	312.482	0.031
312.916	0.016	312.916	0.013	312.916	0.033
313.351	0.016	313.351	0.013	313.351	0.033
313.786	0.014	313.786	0.011	313.786	0.03
314.22	0.012	314.22	0.01	314.22	0.029
314.655	0.01	314.655	0.011	314.655	0.028
315.089	0.01	315.089	0.01	315.089	0.027
315.524	0.009	315.524	0.008	315.524	0.025
315.959	0.009	315.959	0.007	315.959	0.023
316.394	0.01	316.394	0.008	316.394	0.022
316.829	0.009	316.829	0.009	316.829	0.021
317.264	0.01	317.264	0.01	317.264	0.019
317.699	0.01	317.699	0.011	317.699	0.016
318.134	0.012	318.134	0.011	318.134	0.014
318.569	0.014	318.569	0.012	318.569	0.015
319.004	0.016	319.004	0.012	319.004	0.014
319.439	0.015	319.439	0.012	319.439	0.011
319.874	0.016	319.874	0.014	319.874	0.01
320.309	0.016	320.309	0.016	320.309	0.01
320.744	0.019	320.744	0.019	320.744	0.011
321.18	0.018	321.18	0.02	321.18	0.01
321.615	0.017	321.615	0.02	321.615	0.011
322.05	0.016	322.05	0.019	322.05	0.012
322.486	0.014	322.486	0.018	322.486	0.012
322.921	0.013	322.921	0.017	322.921	0.012
323.357	0.011	323.357	0.017	323.357	0.011
323.792	0.009	323.792	0.018	323.792	0.012
324.228	0.01	324.228	0.018	324.228	0.015
324.663	0.01	324.663	0.018	324.663	0.016
325.099	0.01	325.099	0.017	325.099	0.015
325.535	0.009	325.535	0.015	325.535	0.015
325.97	0.009	325.97	0.014	325.97	0.014
326.406	0.009	326.406	0.015	326.406	0.011
326.842	0.01	326.842	0.016	326.842	0.01
327.278	0.009	327.278	0.016	327.278	0.011
327.714	0.008	327.714	0.017	327.714	0.011
328.15	0.008	328.15	0.018	328.15	0.01
328.586	0.009	328.586	0.018	328.586	0.01
329.022	0.009	329.022	0.018	329.022	0.009
329.458	0.008	329.458	0.017	329.458	0.008
329.894	0.009	329.894	0.017	329.894	0.007
330.33	0.01	330.33	0.018	330.33	0.007
330.766	0.01	330.766	0.019	330.766	0.009
331.203	0.011	331.203	0.018	331.203	0.01
331.639	0.011	331.639	0.017	331.639	0.011
332.075	0.011	332.075	0.017	332.075	0.011
332.512	0.01	332.512	0.016	332.512	0.013
332.948	0.01	332.948	0.014	332.948	0.014
333.385	0.011	333.385	0.015	333.385	0.013
333.821	0.012	333.821	0.015	333.821	0.013
334.258	0.013	334.258	0.015	334.258	0.013
334.694	0.013	334.694	0.015	334.694	0.014
335.131	0.013	335.131	0.014	335.131	0.014
335.567	0.012	335.567	0.013	335.567	0.012
336.004	0.012	336.004	0.014	336.004	0.012
336.441	0.011	336.441	0.013	336.441	0.013
336.878	0.013	336.878	0.013	336.878	0.011
337.315	0.015	337.315	0.013	337.315	0.011
337.751	0.017	337.751	0.015	337.751	0.01
338.188	0.017	338.188	0.014	338.188	0.01
338.625	0.016	338.625	0.014	338.625	0.01
339.062	0.017	339.062	0.014	339.062	0.011
339.499	0.018	339.499	0.015	339.499	0.01
339.936	0.018	339.936	0.015	339.936	0.011
340.374	0.019	340.374	0.015	340.374	0.013
340.811	0.021	340.811	0.015	340.811	0.013
341.248	0.023	341.248	0.015	341.248	0.013
341.685	0.023	341.685	0.015	341.685	0.016
342.122	0.023	342.122	0.014	342.122	0.017
342.56	0.021	342.56	0.013	342.56	0.018
342.997	0.021	342.997	0.013	342.997	0.02
343.435	0.021	343.435	0.013	343.435	0.02
343.872	0.021	343.872	0.013	343.872	0.019
344.31	0.021	344.31	0.013	344.31	0.02
344.747	0.02	344.747	0.013	344.747	0.021
345.185	0.02	345.185	0.013	345.185	0.02
345.622	0.019	345.622	0.013	345.622	0.021
346.06	0.018	346.06	0.013	346.06	0.022
346.498	0.019	346.498	0.014	346.498	0.019
346.935	0.02	346.935	0.015	346.935	0.018
347.373	0.021	347.373	0.016	347.373	0.017
347.811	0.02	347.811	0.016	347.811	0.016
348.249	0.02	348.249	0.016	348.249	0.017
348.687	0.019	348.687	0.016	348.687	0.017
349.125	0.019	349.125	0.016	349.125	0.017
349.563	0.02	349.563	0.015	349.563	0.016
350.001	0.021	350.001	0.015	350.001	0.017
350.439	0.021	350.439	0.014	350.439	0.017
350.877	0.022	350.877	0.014	350.877	0.017
351.315	0.021	351.315	0.013	351.315	0.017
351.753	0.021	351.753	0.013	351.753	0.017
352.192	0.022	352.192	0.013	352.192	0.018
352.63	0.022	352.63	0.013	352.63	0.017
353.068	0.022	353.068	0.013	353.068	0.017
353.507	0.022	353.507	0.012	353.507	0.017
353.945	0.023	353.945	0.012	353.945	0.017
354.383	0.022	354.383	0.013	354.383	0.017
354.822	0.022	354.822	0.014	354.822	0.016
355.26	0.022	355.26	0.016	355.26	0.016
355.699	0.022	355.699	0.017	355.699	0.016
356.138	0.022	356.138	0.017	356.138	0.016
356.576	0.022	356.576	0.017	356.576	0.016
357.015	0.023	357.015	0.018	357.015	0.016
357.454	0.024	357.454	0.018	357.454	0.015
357.893	0.026	357.893	0.018	357.893	0.015
358.331	0.027	358.331	0.018	358.331	0.016
358.77	0.028	358.77	0.019	358.77	0.016
359.209	0.027	359.209	0.019	359.209	0.016
359.648	0.027	359.648	0.018	359.648	0.015
360.087	0.028	360.087	0.017	360.087	0.015
360.526	0.027	360.526	0.017	360.526	0.015
360.965	0.027	360.965	0.017	360.965	0.015
361.404	0.026	361.404	0.017	361.404	0.015
361.843	0.025	361.843	0.016	361.843	0.015
362.283	0.025	362.283	0.016	362.283	0.016
362.722	0.025	362.722	0.017	362.722	0.016
363.161	0.024	363.161	0.017	363.161	0.016
363.6	0.023	363.6	0.017	363.6	0.016
364.04	0.024	364.04	0.016	364.04	0.016
364.479	0.025	364.479	0.017	364.479	0.017
364.919	0.025	364.919	0.018	364.919	0.017
365.358	0.026	365.358	0.017	365.358	0.018
365.798	0.026	365.798	0.017	365.798	0.019
366.237	0.026	366.237	0.017	366.237	0.019
366.677	0.026	366.677	0.016	366.677	0.018
367.117	0.027	367.117	0.016	367.117	0.019
367.556	0.026	367.556	0.016	367.556	0.018
367.996	0.025	367.996	0.016	367.996	0.019
368.436	0.025	368.436	0.015	368.436	0.018
368.876	0.026	368.876	0.015	368.876	0.017
369.315	0.026	369.315	0.014	369.315	0.017
369.755	0.026	369.755	0.014	369.755	0.016
370.195	0.026	370.195	0.015	370.195	0.015
370.635	0.026	370.635	0.015	370.635	0.013
371.075	0.026	371.075	0.015	371.075	0.013
371.515	0.026	371.515	0.015	371.515	0.013
371.955	0.026	371.955	0.015	371.955	0.013
372.396	0.028	372.396	0.016	372.396	0.013
372.836	0.029	372.836	0.018	372.836	0.013
373.276	0.029	373.276	0.019	373.276	0.014
373.716	0.028	373.716	0.02	373.716	0.015
374.156	0.028	374.156	0.021	374.156	0.015
374.597	0.029	374.597	0.022	374.597	0.016
375.037	0.029	375.037	0.022	375.037	0.017
375.478	0.03	375.478	0.023	375.478	0.018
375.918	0.031	375.918	0.023	375.918	0.018
376.359	0.031	376.359	0.023	376.359	0.017
376.799	0.031	376.799	0.023	376.799	0.016
377.24	0.03	377.24	0.023	377.24	0.017
377.68	0.031	377.68	0.023	377.68	0.016
378.121	0.032	378.121	0.023	378.121	0.015
378.562	0.032	378.562	0.023	378.562	0.015
379.003	0.032	379.003	0.023	379.003	0.015
379.443	0.032	379.443	0.023	379.443	0.014
379.884	0.033	379.884	0.024	379.884	0.013
380.325	0.034	380.325	0.024	380.325	0.014
380.766	0.034	380.766	0.023	380.766	0.015
381.207	0.035	381.207	0.024	381.207	0.016
381.648	0.036	381.648	0.024	381.648	0.017
382.089	0.037	382.089	0.025	382.089	0.017
382.53	0.037	382.53	0.025	382.53	0.018
382.971	0.038	382.971	0.024	382.971	0.019
383.412	0.04	383.412	0.024	383.412	0.02
383.854	0.041	383.854	0.024	383.854	0.02
384.295	0.041	384.295	0.024	384.295	0.021
384.736	0.041	384.736	0.024	384.736	0.021
385.177	0.041	385.177	0.025	385.177	0.021
385.619	0.041	385.619	0.025	385.619	0.021
386.06	0.041	386.06	0.026	386.06	0.021
386.502	0.042	386.502	0.026	386.502	0.02
386.943	0.042	386.943	0.026	386.943	0.019
387.385	0.043	387.385	0.027	387.385	0.019
387.826	0.043	387.826	0.027	387.826	0.019
388.268	0.043	388.268	0.027	388.268	0.019
388.709	0.044	388.709	0.028	388.709	0.018
389.151	0.044	389.151	0.029	389.151	0.019
389.593	0.046	389.593	0.03	389.593	0.02
390.035	0.046	390.035	0.03	390.035	0.02
390.476	0.047	390.476	0.03	390.476	0.02
390.918	0.047	390.918	0.031	390.918	0.02
391.36	0.047	391.36	0.031	391.36	0.02
391.802	0.047	391.802	0.031	391.802	0.02
392.244	0.048	392.244	0.031	392.244	0.021
392.686	0.049	392.686	0.033	392.686	0.022
393.128	0.05	393.128	0.033	393.128	0.023
393.57	0.05	393.57	0.033	393.57	0.023
394.012	0.051	394.012	0.034	394.012	0.023
394.455	0.05	394.455	0.034	394.455	0.023
394.897	0.051	394.897	0.035	394.897	0.024
395.339	0.052	395.339	0.035	395.339	0.024
395.781	0.052	395.781	0.036	395.781	0.024
396.224	0.052	396.224	0.036	396.224	0.025
396.666	0.053	396.666	0.037	396.666	0.025
397.108	0.053	397.108	0.038	397.108	0.025
397.551	0.053	397.551	0.038	397.551	0.024
397.993	0.054	397.993	0.039	397.993	0.024
398.436	0.054	398.436	0.04	398.436	0.024
398.879	0.055	398.879	0.04	398.879	0.024
399.321	0.056	399.321	0.04	399.321	0.024
399.764	0.056	399.764	0.041	399.764	0.024
400.207	0.057	400.207	0.041	400.207	0.024
400.649	0.058	400.649	0.042	400.649	0.024
401.092	0.059	401.092	0.042	401.092	0.024
401.535	0.06	401.535	0.042	401.535	0.025
401.978	0.061	401.978	0.042	401.978	0.025
402.421	0.063	402.421	0.043	402.421	0.025
402.864	0.064	402.864	0.043	402.864	0.025
403.307	0.065	403.307	0.043	403.307	0.026
403.75	0.066	403.75	0.043	403.75	0.027
404.193	0.066	404.193	0.044	404.193	0.027
404.636	0.067	404.636	0.044	404.636	0.027
405.079	0.068	405.079	0.044	405.079	0.027
405.522	0.068	405.522	0.045	405.522	0.028
405.965	0.068	405.965	0.047	405.965	0.028
406.409	0.069	406.409	0.047	406.409	0.028
406.852	0.07	406.852	0.047	406.852	0.029
407.295	0.069	407.295	0.048	407.295	0.03
407.739	0.069	407.739	0.048	407.739	0.03
408.182	0.07	408.182	0.049	408.182	0.03
408.626	0.071	408.626	0.05	408.626	0.029
409.069	0.072	409.069	0.05	409.069	0.029
409.513	0.073	409.513	0.05	409.513	0.029
409.956	0.073	409.956	0.051	409.956	0.03
410.4	0.074	410.4	0.051	410.4	0.03
410.843	0.074	410.843	0.052	410.843	0.031
411.287	0.075	411.287	0.052	411.287	0.031
411.731	0.075	411.731	0.052	411.731	0.031
412.175	0.076	412.175	0.052	412.175	0.032
412.619	0.076	412.619	0.053	412.619	0.032
413.062	0.076	413.062	0.054	413.062	0.032
413.506	0.076	413.506	0.054	413.506	0.032
413.95	0.076	413.95	0.054	413.95	0.033
414.394	0.077	414.394	0.055	414.394	0.034
414.838	0.077	414.838	0.055	414.838	0.034
415.282	0.078	415.282	0.054	415.282	0.033
415.726	0.079	415.726	0.054	415.726	0.033
416.171	0.079	416.171	0.054	416.171	0.033
416.615	0.08	416.615	0.055	416.615	0.033
417.059	0.081	417.059	0.055	417.059	0.033
417.503	0.081	417.503	0.054	417.503	0.033
417.948	0.081	417.948	0.055	417.948	0.034
418.392	0.081	418.392	0.055	418.392	0.034
418.836	0.082	418.836	0.056	418.836	0.034
419.281	0.08	419.281	0.056	419.281	0.035
419.725	0.08	419.725	0.057	419.725	0.035
420.17	0.079	420.17	0.058	420.17	0.036
420.614	0.08	420.614	0.058	420.614	0.036
421.059	0.079	421.059	0.058	421.059	0.036
421.504	0.078	421.504	0.058	421.504	0.036
421.948	0.078	421.948	0.059	421.948	0.037
422.393	0.078	422.393	0.058	422.393	0.038
422.838	0.077	422.838	0.058	422.838	0.038
423.282	0.077	423.282	0.057	423.282	0.039
423.727	0.076	423.727	0.056	423.727	0.039
424.172	0.076	424.172	0.055	424.172	0.038
424.617	0.076	424.617	0.055	424.617	0.039
425.062	0.075	425.062	0.054	425.062	0.04
425.507	0.074	425.507	0.053	425.507	0.041
425.952	0.073	425.952	0.053	425.952	0.04
426.397	0.072	426.397	0.053	426.397	0.041
426.842	0.072	426.842	0.052	426.842	0.041
427.287	0.071	427.287	0.052	427.287	0.04
427.733	0.071	427.733	0.051	427.733	0.041
428.178	0.071	428.178	0.051	428.178	0.041
428.623	0.069	428.623	0.051	428.623	0.042
429.068	0.068	429.068	0.051	429.068	0.043
429.514	0.067	429.514	0.051	429.514	0.043
429.959	0.066	429.959	0.05	429.959	0.043
430.404	0.065	430.404	0.05	430.404	0.043
430.85	0.064	430.85	0.049	430.85	0.044
431.295	0.063	431.295	0.049	431.295	0.044
431.741	0.063	431.741	0.048	431.741	0.044
432.187	0.062	432.187	0.047	432.187	0.045
432.632	0.061	432.632	0.047	432.632	0.044
433.078	0.06	433.078	0.046	433.078	0.045
433.524	0.06	433.524	0.045	433.524	0.045
433.969	0.059	433.969	0.044	433.969	0.045
434.415	0.058	434.415	0.044	434.415	0.046
434.861	0.057	434.861	0.043	434.861	0.047
435.307	0.055	435.307	0.043	435.307	0.047
435.753	0.055	435.753	0.043	435.753	0.049
436.199	0.054	436.199	0.042	436.199	0.05
436.645	0.053	436.645	0.042	436.645	0.051
437.091	0.051	437.091	0.042	437.091	0.052
437.537	0.05	437.537	0.041	437.537	0.053
437.983	0.049	437.983	0.041	437.983	0.053
438.429	0.047	438.429	0.041	438.429	0.053
438.875	0.046	438.875	0.04	438.875	0.054
439.321	0.045	439.321	0.039	439.321	0.054
439.768	0.043	439.768	0.038	439.768	0.054
440.214	0.042	440.214	0.037	440.214	0.054
440.66	0.041	440.66	0.037	440.66	0.053
441.107	0.04	441.107	0.036	441.107	0.053
441.553	0.039	441.553	0.035	441.553	0.053
441.999	0.037	441.999	0.034	441.999	0.053
442.446	0.036	442.446	0.033	442.446	0.053
442.892	0.034	442.892	0.032	442.892	0.053
443.339	0.033	443.339	0.032	443.339	0.053
443.786	0.032	443.786	0.032	443.786	0.053
444.232	0.031	444.232	0.031	444.232	0.053
444.679	0.029	444.679	0.031	444.679	0.052
445.126	0.028	445.126	0.03	445.126	0.053
445.572	0.026	445.572	0.029	445.572	0.052
446.019	0.025	446.019	0.028	446.019	0.053
446.466	0.023	446.466	0.027	446.466	0.054
446.913	0.022	446.913	0.027	446.913	0.054
447.36	0.021	447.36	0.026	447.36	0.055
447.807	0.02	447.807	0.025	447.807	0.056
448.254	0.019	448.254	0.025	448.254	0.056
448.701	0.018	448.701	0.024	448.701	0.056
449.148	0.018	449.148	0.023	449.148	0.057
449.595	0.017	449.595	0.023	449.595	0.058
450.042	0.016	450.042	0.022	450.042	0.06
450.49	0.016	450.49	0.021	450.49	0.061
450.937	0.015	450.937	0.021	450.937	0.061
451.384	0.015	451.384	0.021	451.384	0.061
451.831	0.014	451.831	0.02	451.831	0.061
452.279	0.013	452.279	0.02	452.279	0.062
452.726	0.012	452.726	0.02	452.726	0.061
453.174	0.012	453.174	0.019	453.174	0.062
453.621	0.011	453.621	0.018	453.621	0.062
454.069	0.01	454.069	0.017	454.069	0.063
454.516	0.009	454.516	0.016	454.516	0.062
454.964	0.008	454.964	0.015	454.964	0.062
455.411	0.007	455.411	0.014	455.411	0.061
455.859	0.006	455.859	0.013	455.859	0.061
456.307	0.005	456.307	0.013	456.307	0.062
456.754	0.005	456.754	0.013	456.754	0.061
457.202	0.004	457.202	0.012	457.202	0.06
457.65	0.004	457.65	0.012	457.65	0.06
458.098	0.003	458.098	0.011	458.098	0.06
458.546	0.002	458.546	0.011	458.546	0.061
458.994	0.002	458.994	0.011	458.994	0.061
459.442	0.001	459.442	0.011	459.442	0.061
459.89	0.001	459.89	0.011	459.89	0.061
460.338	0.001	460.338	0.011	460.338	0.062
460.786	0.002	460.786	0.011	460.786	0.062
461.234	0.002	461.234	0.011	461.234	0.062
461.682	0.002	461.682	0.01	461.682	0.062
462.131	0.002	462.131	0.01	462.131	0.062
462.579	0.002	462.579	0.009	462.579	0.062
463.027	0.002	463.027	0.008	463.027	0.062
463.475	0.001	463.475	0.008	463.475	0.062
463.924	0.002	463.924	0.008	463.924	0.062
464.372	0.001	464.372	0.007	464.372	0.063
464.821	0.001	464.821	0.007	464.821	0.062
465.269	0.001	465.269	0.007	465.269	0.062
465.718	0.001	465.718	0.006	465.718	0.063
466.166	0.001	466.166	0.006	466.166	0.062
466.615	0.001	466.615	0.006	466.615	0.062
467.064	0.001	467.064	0.006	467.064	0.062
467.512	0.001	467.512	0.006	467.512	0.062
467.961	0.001	467.961	0.006	467.961	0.062
468.41	0.001	468.41	0.006	468.41	0.062
468.858	0.001	468.858	0.005	468.858	0.061
469.307	0	469.307	0.005	469.307	0.06
469.756	0	469.756	0.005	469.756	0.059
470.205	0	470.205	0.004	470.205	0.057
470.654	0	470.654	0.004	470.654	0.055
471.103	0	471.103	0.004	471.103	0.055
471.552	0	471.552	0.003	471.552	0.054
472.001	-0.001	472.001	0.003	472.001	0.053
472.45	-0.001	472.45	0.003	472.45	0.052
472.899	-0.001	472.899	0.002	472.899	0.051
473.349	0	473.349	0.002	473.349	0.051
473.798	0	473.798	0.002	473.798	0.051
474.247	0.001	474.247	0.002	474.247	0.05
474.696	0	474.696	0.001	474.696	0.05
475.146	0	475.146	0.001	475.146	0.049
475.595	-0.001	475.595	0.001	475.595	0.049
476.045	-0.002	476.045	0	476.045	0.048
476.494	-0.002	476.494	0	476.494	0.047
476.944	-0.002	476.944	0.001	476.944	0.047
477.393	-0.002	477.393	0.001	477.393	0.046
477.843	-0.002	477.843	0.002	477.843	0.045
478.292	-0.002	478.292	0.002	478.292	0.045
478.742	-0.001	478.742	0.002	478.742	0.044
479.192	-0.001	479.192	0.003	479.192	0.044
479.641	-0.001	479.641	0.003	479.641	0.044
480.091	0	480.091	0.003	480.091	0.043
480.541	0	480.541	0.003	480.541	0.042
480.991	0.001	480.991	0.003	480.991	0.043
481.441	0.001	481.441	0.003	481.441	0.042
481.891	0.001	481.891	0.002	481.891	0.042
482.341	0.001	482.341	0.002	482.341	0.042
482.791	0.001	482.791	0.001	482.791	0.042
483.241	0.001	483.241	0.001	483.241	0.041
483.691	0	483.691	0.001	483.691	0.04
484.141	0	484.141	0	484.141	0.039
484.591	0	484.591	0.001	484.591	0.038
485.041	-0.001	485.041	0.001	485.041	0.038
485.491	-0.001	485.491	0.001	485.491	0.037
485.942	-0.002	485.942	0	485.942	0.036
486.392	-0.001	486.392	0	486.392	0.035
486.842	-0.001	486.842	0	486.842	0.034
487.293	-0.001	487.293	0.001	487.293	0.033
487.743	-0.001	487.743	0	487.743	0.032
488.194	-0.001	488.194	0	488.194	0.031
488.644	-0.001	488.644	0	488.644	0.031
489.095	0	489.095	0	489.095	0.03
489.545	0	489.545	-0.001	489.545	0.03
489.996	0	489.996	-0.001	489.996	0.029
490.447	0.001	490.447	-0.001	490.447	0.029
490.897	0.001	490.897	-0.001	490.897	0.028
491.348	0.001	491.348	0	491.348	0.028
491.799	0.001	491.799	0	491.799	0.027
492.25	0.001	492.25	0	492.25	0.027
492.7	0	492.7	0	492.7	0.027
493.151	0	493.151	0	493.151	0.027
493.602	0	493.602	0	493.602	0.027
494.053	0	494.053	0	494.053	0.026
494.504	0	494.504	0	494.504	0.025
494.955	-0.001	494.955	0	494.955	0.025
495.406	-0.001	495.406	0	495.406	0.024
495.858	0	495.858	0	495.858	0.023
496.309	0	496.309	0	496.309	0.022
496.76	0	496.76	0	496.76	0.022
497.211	0	497.211	0	497.211	0.021
497.662	0.001	497.662	-0.001	497.662	0.02
498.114	0.001	498.114	-0.001	498.114	0.019
498.565	0.001	498.565	0	498.565	0.019
499.016	0.001	499.016	0	499.016	0.018
499.468	0.001	499.468	0	499.468	0.018
499.919	0.001	499.919	0	499.919	0.017
500.371	0	500.371	0.001	500.371	0.017
500.822	0	500.822	0.001	500.822	0.017
501.274	0	501.274	0.001	501.274	0.017
501.726	0	501.726	0.001	501.726	0.016
502.177	0	502.177	0.001	502.177	0.016
502.629	-0.001	502.629	0.001	502.629	0.015
503.081	0	503.081	0.001	503.081	0.015
503.532	-0.001	503.532	0	503.532	0.015
503.984	-0.001	503.984	0	503.984	0.014
504.436	-0.001	504.436	0	504.436	0.014
504.888	0	504.888	0	504.888	0.013
505.34	0	505.34	0	505.34	0.012
505.792	0	505.792	0	505.792	0.012
506.244	0	506.244	0	506.244	0.011
506.696	0	506.696	-0.001	506.696	0.011
507.148	0	507.148	-0.001	507.148	0.011
507.6	0	507.6	-0.001	507.6	0.011
508.052	0	508.052	-0.001	508.052	0.011
508.504	0	508.504	-0.001	508.504	0.011
508.957	0.001	508.957	-0.001	508.957	0.011
509.409	0.001	509.409	0	509.409	0.011
509.861	0.001	509.861	0	509.861	0.011
510.314	0.001	510.314	0	510.314	0.01
510.766	0.001	510.766	0	510.766	0.009
511.218	0.001	511.218	0	511.218	0.009
511.671	0.001	511.671	0	511.671	0.009
512.123	0.001	512.123	-0.001	512.123	0.008
512.576	0.001	512.576	-0.001	512.576	0.008
513.028	0.001	513.028	0	513.028	0.007
513.481	0.001	513.481	0	513.481	0.006
513.934	0.001	513.934	-0.001	513.934	0.006
514.386	0.001	514.386	0	514.386	0.005
514.839	0.001	514.839	0	514.839	0.005
515.292	0.001	515.292	-0.001	515.292	0.005
515.745	0	515.745	-0.001	515.745	0.005
516.197	0	516.197	-0.001	516.197	0.005
516.65	0	516.65	-0.001	516.65	0.005
517.103	0	517.103	-0.001	517.103	0.005
517.556	0	517.556	0	517.556	0.005
518.009	0	518.009	0	518.009	0.005
518.462	0	518.462	0	518.462	0.005
518.915	0	518.915	0	518.915	0.005
519.368	0	519.368	0	519.368	0.005
519.821	0	519.821	-0.001	519.821	0.005
520.275	0	520.275	-0.001	520.275	0.005
520.728	0	520.728	-0.001	520.728	0.005
521.181	0.001	521.181	-0.001	521.181	0.004
521.634	0.001	521.634	-0.001	521.634	0.004
522.088	0	522.088	-0.001	522.088	0.004
522.541	0	522.541	-0.001	522.541	0.004
522.994	0	522.994	0	522.994	0.003
523.448	0	523.448	0	523.448	0.003
523.901	-0.001	523.901	0	523.901	0.002
524.355	-0.001	524.355	0.001	524.355	0.002
524.808	-0.001	524.808	0.001	524.808	0.002
525.262	-0.001	525.262	0.001	525.262	0.002
525.716	0	525.716	0.001	525.716	0.002
526.169	-0.001	526.169	0.001	526.169	0.002
526.623	-0.001	526.623	0.002	526.623	0.002
527.077	0	527.077	0.002	527.077	0.002
527.53	0	527.53	0.002	527.53	0.002
527.984	0	527.984	0.002	527.984	0.002
528.438	0	528.438	0.002	528.438	0.002
528.892	0.001	528.892	0.001	528.892	0.002
529.346	0.001	529.346	0.001	529.346	0.002
529.8	0.001	529.8	0.001	529.8	0.002
530.254	0.002	530.254	0.001	530.254	0.002
530.708	0.002	530.708	0.001	530.708	0.002
531.162	0.002	531.162	0.001	531.162	0.002
531.616	0.002	531.616	0.001	531.616	0.002
532.07	0.002	532.07	0.001	532.07	0.002
532.525	0.002	532.525	0.001	532.525	0.002
532.979	0.002	532.979	0.001	532.979	0.002
533.433	0.002	533.433	0.001	533.433	0.002
533.887	0.001	533.887	0.001	533.887	0.002
534.342	0.001	534.342	0.001	534.342	0.002
534.796	0.001	534.796	0.001	534.796	0.002
535.25	0	535.25	0.001	535.25	0.002
535.705	0	535.705	0	535.705	0.001
536.159	0	536.159	0	536.159	0.001
536.614	0	536.614	0	536.614	0.001
537.068	0	537.068	0	537.068	0.001
537.523	0	537.523	0	537.523	0.001
537.978	0	537.978	0	537.978	0.002
538.432	0.001	538.432	0.001	538.432	0.002
538.887	0.001	538.887	0.001	538.887	0.003
539.342	0.001	539.342	0.001	539.342	0.003
539.797	0.001	539.797	0.001	539.797	0.003
540.251	0.001	540.251	0.001	540.251	0.004
540.706	0.001	540.706	0.002	540.706	0.004
541.161	0.002	541.161	0.001	541.161	0.005
541.616	0.001	541.616	0.001	541.616	0.004
542.071	0.001	542.071	0.001	542.071	0.004
542.526	0.001	542.526	0	542.526	0.004
542.981	0.001	542.981	0	542.981	0.004
543.436	0	543.436	0	543.436	0.004
543.891	0	543.891	0	543.891	0.004
544.347	-0.001	544.347	0	544.347	0.004
544.802	-0.001	544.802	0	544.802	0.004
545.257	-0.001	545.257	0	545.257	0.004
545.712	-0.001	545.712	0	545.712	0.004
546.168	-0.001	546.168	0.001	546.168	0.004
546.623	-0.001	546.623	0.001	546.623	0.004
547.078	-0.001	547.078	0.001	547.078	0.005
547.534	-0.001	547.534	0.001	547.534	0.004
547.989	-0.001	547.989	0.001	547.989	0.004
548.445	-0.001	548.445	0.001	548.445	0.005
548.9	0	548.9	0	548.9	0.005
549.356	0	549.356	0.001	549.356	0.005
549.811	0	549.811	0.001	549.811	0.005
550.267	0	550.267	0.001	550.267	0.005
550.723	0	550.723	0.001	550.723	0.006
551.179	0.001	551.179	0.001	551.179	0.005
551.634	0	551.634	0.001	551.634	0.006
552.09	0.001	552.09	0	552.09	0.005
552.546	0.001	552.546	0.001	552.546	0.006
553.002	0.001	553.002	0.001	553.002	0.006
553.458	0.001	553.458	0.001	553.458	0.006
553.914	0.001	553.914	0.001	553.914	0.006
554.37	0.002	554.37	0	554.37	0.006
554.826	0.002	554.826	0	554.826	0.006
555.282	0.002	555.282	-0.001	555.282	0.006
555.738	0.002	555.738	-0.001	555.738	0.006
556.194	0.002	556.194	-0.001	556.194	0.006
556.65	0.002	556.65	-0.001	556.65	0.006
557.106	0.002	557.106	-0.001	557.106	0.005
557.563	0.002	557.563	-0.001	557.563	0.005
558.019	0.002	558.019	0	558.019	0.004
558.475	0.001	558.475	-0.001	558.475	0.004
558.931	0.001	558.931	0	558.931	0.003
559.388	0	559.388	0	559.388	0.002
559.844	0	559.844	0	559.844	0.002
560.301	0	560.301	0	560.301	0.001
560.757	-0.001	560.757	0	560.757	0.001
561.214	-0.001	561.214	0	561.214	0.001
561.67	-0.001	561.67	0	561.67	0.001
562.127	-0.001	562.127	0	562.127	0
562.584	-0.001	562.584	0	562.584	0
563.04	0	563.04	-0.001	563.04	0
563.497	0	563.497	-0.001	563.497	0
563.954	0	563.954	-0.001	563.954	0
564.411	0.001	564.411	-0.001	564.411	0.001
564.867	0.001	564.867	-0.001	564.867	0
565.324	0	565.324	-0.001	565.324	0
565.781	0	565.781	-0.001	565.781	0
566.238	0	566.238	0	566.238	-0.001
566.695	0	566.695	0	566.695	-0.001
567.152	0	567.152	0.001	567.152	0
567.609	0	567.609	0.001	567.609	0
568.066	0	568.066	0.001	568.066	0
568.523	0	568.523	0.002	568.523	0
568.981	0	568.981	0.002	568.981	0
569.438	0	569.438	0.002	569.438	0
569.895	0	569.895	0.002	569.895	0
570.352	0	570.352	0.001	570.352	-0.001
570.81	0	570.81	0.001	570.81	0
571.267	0	571.267	0.001	571.267	0
571.724	0	571.724	0.001	571.724	0
572.182	0	572.182	0.001	572.182	-0.001
572.639	0	572.639	0.001	572.639	-0.001
573.097	0	573.097	0.001	573.097	-0.001
573.554	0	573.554	0	573.554	-0.001
574.012	0	574.012	0	574.012	-0.001
574.469	0	574.469	0	574.469	-0.001
574.927	0.001	574.927	0.001	574.927	-0.001
575.385	0.001	575.385	0.001	575.385	-0.001
575.842	0.001	575.842	0	575.842	-0.001
576.3	0.002	576.3	0	576.3	-0.001
576.758	0.002	576.758	0	576.758	-0.001
577.216	0.002	577.216	0	577.216	-0.001
577.674	0.002	577.674	0	577.674	-0.001
578.131	0.002	578.131	0	578.131	-0.001
578.589	0.002	578.589	0.001	578.589	-0.001
579.047	0.001	579.047	0.001	579.047	-0.001
579.505	0.001	579.505	0.001	579.505	-0.001
579.963	0.001	579.963	0.001	579.963	-0.001
580.421	0	580.421	0	580.421	-0.001
580.88	0	580.88	0	580.88	-0.001
581.338	0	581.338	0	581.338	-0.001
581.796	0	581.796	0	581.796	-0.001
582.254	0	582.254	0	582.254	-0.001
582.712	-0.001	582.712	-0.001	582.712	-0.001
583.171	-0.001	583.171	-0.001	583.171	-0.001
583.629	-0.001	583.629	0	583.629	-0.001
584.087	-0.001	584.087	0	584.087	-0.001
584.546	-0.001	584.546	0.001	584.546	-0.001
585.004	-0.001	585.004	0.001	585.004	0
585.463	0	585.463	0.002	585.463	0
585.921	0	585.921	0.003	585.921	0
586.38	0	586.38	0.003	586.38	0
586.838	0	586.838	0.003	586.838	0
587.297	0	587.297	0.003	587.297	0.001
587.756	0	587.756	0.003	587.756	0.001
588.214	0.001	588.214	0.003	588.214	0.001
588.673	0.001	588.673	0.002	588.673	0.001
589.132	0.002	589.132	0.002	589.132	0.001
589.591	0.002	589.591	0.002	589.591	0.001
590.05	0.002	590.05	0.001	590.05	0.001
590.508	0.002	590.508	0.001	590.508	0.001
590.967	0.002	590.967	0.001	590.967	0
591.426	0.003	591.426	0.001	591.426	0
591.885	0.003	591.885	0.001	591.885	0
592.344	0.003	592.344	0	592.344	0
592.803	0.003	592.803	0.001	592.803	0
593.262	0.003	593.262	0.001	593.262	0
593.722	0.002	593.722	0.001	593.722	0
594.181	0.002	594.181	0.001	594.181	0
594.64	0.002	594.64	0.002	594.64	0
595.099	0.002	595.099	0.001	595.099	0
595.558	0.002	595.558	0.001	595.558	0
596.018	0.002	596.018	0	596.018	0
596.477	0.002	596.477	0	596.477	0
596.936	0.001	596.936	0	596.936	0
597.396	0.001	597.396	0	597.396	0
597.855	0.001	597.855	0	597.855	-0.001
598.315	0.001	598.315	-0.001	598.315	-0.001
598.774	0.001	598.774	-0.001	598.774	-0.001
599.234	0.001	599.234	-0.001	599.234	-0.001
599.694	0.001	599.694	-0.001	599.694	-0.001
600.153	0.001	600.153	-0.001	600.153	-0.001
600.613	0.001	600.613	0	600.613	-0.001
601.073	0.001	601.073	0.001	601.073	-0.001
601.532	0.001	601.532	0.001	601.532	-0.001
601.992	0.001	601.992	0.002	601.992	-0.001
602.452	0.001	602.452	0.001	602.452	-0.002
602.912	0	602.912	0.001	602.912	-0.001
603.372	0	603.372	0.001	603.372	-0.001
603.832	0	603.832	0.001	603.832	-0.001
604.292	-0.001	604.292	0.001	604.292	-0.001
604.752	-0.001	604.752	0.001	604.752	-0.001
605.212	-0.001	605.212	0.001	605.212	-0.001
605.672	-0.001	605.672	0.001	605.672	-0.001
606.132	-0.001	606.132	0.001	606.132	0
606.592	0	606.592	0.001	606.592	0
607.052	0	607.052	0.001	607.052	0.001
607.512	0.001	607.512	0.001	607.512	0.001
607.973	0.002	607.973	0.001	607.973	0.001
608.433	0.002	608.433	0.001	608.433	0.001
608.893	0.003	608.893	0.002	608.893	0.001
609.354	0.003	609.354	0.002	609.354	0
609.814	0.003	609.814	0.002	609.814	0
610.274	0.003	610.274	0.002	610.274	0
610.735	0.003	610.735	0.002	610.735	0
611.195	0.003	611.195	0.002	611.195	0
611.656	0.003	611.656	0.002	611.656	0
612.116	0.003	612.116	0.002	612.116	0
612.577	0.004	612.577	0.003	612.577	0
613.038	0.004	613.038	0.003	613.038	0.001
613.498	0.004	613.498	0.003	613.498	0
613.959	0.004	613.959	0.003	613.959	0
614.42	0.004	614.42	0.003	614.42	0
614.881	0.004	614.881	0.004	614.881	0
615.341	0.004	615.341	0.004	615.341	0
615.802	0.004	615.802	0.004	615.802	0
616.263	0.004	616.263	0.004	616.263	0
616.724	0.004	616.724	0.004	616.724	0
617.185	0.003	617.185	0.004	617.185	0
617.646	0.003	617.646	0.003	617.646	0.001
618.107	0.003	618.107	0.003	618.107	0.001
618.568	0.003	618.568	0.003	618.568	0.002
619.029	0.004	619.029	0.003	619.029	0.002
619.491	0.004	619.491	0.002	619.491	0.002
619.952	0.004	619.952	0.002	619.952	0.002
620.413	0.004	620.413	0.002	620.413	0.002
620.874	0.004	620.874	0.002	620.874	0.002
621.335	0.003	621.335	0.002	621.335	0.002
621.797	0.003	621.797	0.003	621.797	0.001
622.258	0.003	622.258	0.003	622.258	0
622.72	0.003	622.72	0.003	622.72	0
623.181	0.002	623.181	0.004	623.181	-0.001
623.642	0.002	623.642	0.005	623.642	-0.001
624.104	0.002	624.104	0.005	624.104	-0.001
624.565	0.002	624.565	0.005	624.565	-0.001
625.027	0.002	625.027	0.005	625.027	-0.001
625.489	0.003	625.489	0.005	625.489	-0.001
625.95	0.003	625.95	0.005	625.95	-0.001
626.412	0.003	626.412	0.005	626.412	-0.001
626.874	0.003	626.874	0.004	626.874	-0.001
627.335	0.003	627.335	0.003	627.335	0
627.797	0.004	627.797	0.002	627.797	0
628.259	0.004	628.259	0.002	628.259	0
628.721	0.004	628.721	0.001	628.721	0
629.183	0.003	629.183	0.001	629.183	0
629.645	0.003	629.645	0.002	629.645	0.001
630.107	0.003	630.107	0.001	630.107	0.001
630.569	0.003	630.569	0.002	630.569	0.001
631.031	0.003	631.031	0.002	631.031	0.001
631.493	0.003	631.493	0.002	631.493	0.001
631.955	0.003	631.955	0.002	631.955	0.001
632.417	0.002	632.417	0.003	632.417	0.001
632.879	0.002	632.879	0.003	632.879	0
633.341	0.001	633.341	0.002	633.341	0
633.804	0.001	633.804	0.002	633.804	0
634.266	0.001	634.266	0.001	634.266	0
634.728	0	634.728	0.001	634.728	0
635.191	0	635.191	0.001	635.191	0
635.653	0	635.653	0.001	635.653	0
636.115	0	636.115	0.001	636.115	-0.001
636.578	0	636.578	0.001	636.578	-0.001
637.04	0	637.04	0.002	637.04	0
637.503	0	637.503	0.002	637.503	0
637.966	0.001	637.966	0.002	637.966	0.001
638.428	0.002	638.428	0.002	638.428	0.001
638.891	0.002	638.891	0.002	638.891	0.001
639.353	0.003	639.353	0.002	639.353	0.001
639.816	0.003	639.816	0.002	639.816	0.002
640.279	0.003	640.279	0.002	640.279	0.002
640.742	0.003	640.742	0.002	640.742	0.002
641.205	0.002	641.205	0.001	641.205	0.001
641.667	0.002	641.667	0.001	641.667	0.001
642.13	0.002	642.13	0	642.13	0.001
642.593	0.001	642.593	0	642.593	0
643.056	0	643.056	0	643.056	0
643.519	0	643.519	0	643.519	-0.001
643.982	-0.001	643.982	0.001	643.982	-0.001
644.445	-0.001	644.445	0.001	644.445	-0.001
644.908	-0.001	644.908	0.001	644.908	-0.001
645.371	-0.001	645.371	0.002	645.371	-0.001
645.835	-0.001	645.835	0.002	645.835	-0.001
646.298	-0.001	646.298	0.002	646.298	-0.001
646.761	0	646.761	0.003	646.761	0
647.224	0	647.224	0.003	647.224	0
647.688	0.001	647.688	0.004	647.688	0
648.151	0.002	648.151	0.004	648.151	0.001
648.614	0.002	648.614	0.003	648.614	0.001
649.078	0.003	649.078	0.003	649.078	0.002
649.541	0.004	649.541	0.002	649.541	0.002
650.005	0.004	650.005	0.002	650.005	0.002
650.468	0.004	650.468	0.001	650.468	0.002
650.932	0.005	650.932	0	650.932	0.002
651.395	0.005	651.395	0	651.395	0.002
651.859	0.006	651.859	-0.001	651.859	0.003
652.323	0.006	652.323	-0.001	652.323	0.003
652.786	0.006	652.786	-0.001	652.786	0.003
653.25	0.006	653.25	-0.001	653.25	0.003
653.714	0.005	653.714	0	653.714	0.002
654.178	0.005	654.178	0	654.178	0.002
654.641	0.005	654.641	0	654.641	0.002
655.105	0.004	655.105	0.001	655.105	0.002
655.569	0.004	655.569	0.001	655.569	0.002
656.033	0.003	656.033	0.002	656.033	0.001
656.497	0.003	656.497	0.002	656.497	0.001
656.961	0.003	656.961	0.003	656.961	0.001
657.425	0.003	657.425	0.002	657.425	0.001
657.889	0.002	657.889	0.002	657.889	0
658.353	0.002	658.353	0.001	658.353	0
658.817	0.002	658.817	0.001	658.817	0
659.282	0.002	659.282	0	659.282	0
659.746	0.002	659.746	0	659.746	0
660.21	0.003	660.21	0	660.21	0.001
660.674	0.003	660.674	-0.001	660.674	0.001
661.139	0.004	661.139	-0.001	661.139	0.001
661.603	0.004	661.603	0	661.603	0.001
662.067	0.004	662.067	0	662.067	0.001
662.532	0.004	662.532	0	662.532	0.001
662.996	0.004	662.996	0.001	662.996	0.001
663.461	0.003	663.461	0.002	663.461	0.001
663.925	0.003	663.925	0.003	663.925	0
664.39	0.002	664.39	0.003	664.39	0
664.855	0.002	664.855	0.004	664.855	0
665.319	0.001	665.319	0.004	665.319	-0.001
665.784	0.001	665.784	0.004	665.784	-0.001
666.249	0	666.249	0.004	666.249	-0.001
666.713	0	666.713	0.003	666.713	-0.001
667.178	0	667.178	0.003	667.178	-0.002
667.643	0	667.643	0.003	667.643	-0.002
668.108	0	668.108	0.002	668.108	-0.002
668.573	0	668.573	0.001	668.573	-0.001
669.037	0	669.037	0.001	669.037	-0.001
669.502	0	669.502	0.001	669.502	0
669.967	0	669.967	0	669.967	0
670.432	0	670.432	0	670.432	0.001
[truncated: 933 more rows]

## Sheet: Figure 5e
Mins
[truncated: 603 more rows]

[truncated: 13 more sheets: Figure 5f, Figure S8, Figure S9, Figure S10, Figure S12, Figure S13, Figure S14, Figure 15, Figure S16, Figure S18, Figure S19, Figure S20, Figure S21]
