# Supplementary material for: Supramolecular Polynuclear Clusters Mediated Assembly of Cubic Hydrogen-Bonded Organic Frameworks with Octahedral Cages for Reversible Photochromism
Source: Research Square preprint supplement (doi:10.21203/rs.3.rs-3670187/v1), 2023-12-07
Supplement: Supplementary file 2 [file 858936427381eaa688ed511f.pdf]

## checkCIF/PLATON report

Structure factors have been supplied for datablock(s) cu\_tca\_i6\_0m

THIS REPORT IS FOR GUIDANCE ONLY. IF USED AS PART OF A REVIEW PROCEDURE FOR PUBLICATION, IT SHOULD NOT REPLACE THE EXPERTISE OF AN EXPERIENCED CRYSTALLOGRAPHIC REFEREE.

No syntax errors found.      CIF dictionary      Interpreting this report

### Datablock: cu\_tca\_i6\_0m

---

Bond precision:      C-C = 0.0079 Å      Wavelength=1.54178

Cell:                      a=20.959(1)                      b=20.959(1)                      c=20.959(1)  
                                 alpha=90                      beta=90                      gamma=90

Temperature:              170 K

|                        | Calculated                                                    | Reported                                                        |
|------------------------|---------------------------------------------------------------|-----------------------------------------------------------------|
| Volume                 | 9206.9(13)                                                    | 9206.9(13)                                                      |
| Space group            | I 2 3                                                         | I 2 3                                                           |
| Hall group             | I 2 2 3                                                       | I 2 2 3                                                         |
| Moiety formula         | 4(C21 H12 N O6), 4(C21 H15 N O6), C4 H4 I12, 6(H O), 12(H4 N) | 2(C21 H12 N O6), 2(C21 H15 N O6), 6(H4 N), 1.5(H2 O2), 0.5(C4 H |
| Sum formula            | C172 H166 I12 N20 O54                                         | C86 H83 I6 N10 O27                                              |
| Mr                     | 4900.05                                                       | 2450.02                                                         |
| Dx, g cm <sup>-3</sup> | 1.768                                                         | 1.768                                                           |
| Z                      | 2                                                             | 4                                                               |
| Mu (mm <sup>-1</sup> ) | 16.593                                                        | 16.593                                                          |
| F000                   | 4812.0                                                        | 4812.0                                                          |
| F000'                  | 4819.46                                                       |                                                                 |
| h, k, lmax             |                                                               | 24, 25, 21                                                      |
| Nref                   |                                                               | 2827                                                            |
| Tmin, Tmax             | 0.117, 0.137                                                  | 0.540, 0.753                                                    |
| Tmin'                  | 0.012                                                         |                                                                 |

Correction method= # Reported T Limits: Tmin=0.540 Tmax=0.753

AbsCorr = NONE

Data completeness=

Theta(max)= 68.285



R(reflections)= 0.0696( 2550)

wR2(reflections)=  
0.2132( 2827)

S = 1.130

Npar= 189

---

The following ALERTS were generated. Each ALERT has the format

**test-name\_ALERT\_alert-type\_alert-level.**

Click on the hyperlinks for more details of the test.

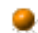

### Alert level B

PLAT250\_ALERT\_2\_B Large U3/U1 Ratio for Average U(i,j) Tensor ....

4.6 Note

**Author Response: Because photoactive CHI3 that encapsulated within the unit cell became disordered. Disordered singal of I atoms resluted in above alert.**

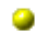

### Alert level C

STRVA01\_ALERT\_4\_C Flack test results are ambiguous.

From the CIF: \_refine\_ls\_abs\_structure\_Flack 0.500

From the CIF: \_refine\_ls\_abs\_structure\_Flack\_su 25.000

PLAT042\_ALERT\_1\_C Calc. and Reported MoietyFormula Strings Differ Please Check

Calc: 4(C21 H12 N O6), 4(C21 H15 N O6), C4 H4 I12, 6(H O), 12(H4 N

Rep.: 2(C21 H12 N O6), 2(C21 H15 N O6), 6(H4 N), 1.5(H2 O2), 0.5(C

PLAT057\_ALERT\_3\_C Correction for Absorption Required RT(exp) ... 1.17 Do !

PLAT202\_ALERT\_3\_C Isotropic non-H Atoms in Anion/Solvent ..... 2 Check

I1 C15

PLAT241\_ALERT\_2\_C High 'MainMol' Ueq as Compared to Neighbors of C00K Check

PLAT250\_ALERT\_2\_C Large U3/U1 Ratio for Average U(i,j) Tensor .... 3.7 Note

**Author Response: Because photoactive CHI3 that encapsulated within the unit cell became disordered. Disordered singal of I atoms resluted in above alert.**

PLAT260\_ALERT\_2\_C Large Average Ueq of Residue Including O00M 0.149 Check

PLAT790\_ALERT\_4\_C Centre of Gravity not Within Unit Cell: Resd. # 1 Note

C21 H12 N O6

PLAT927\_ALERT\_1\_C Reported and Calculated wR2 Differ by ..... 0.0022 Check

PLAT976\_ALERT\_2\_C Check Calcd Resid. Dens. 0.65Ang From O00M . -0.68 eA-3

PLAT977\_ALERT\_2\_C Check Negative Difference Density on H00M . -0.32 eA-3

PLAT987\_ALERT\_1\_C The Flack x is >> 0 - Do a BASF/TWIN Refinement Please Check

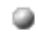

### Alert level G

PLAT002\_ALERT\_2\_G Number of Distance or Angle Restraints on AtSite 4 Note

PLAT003\_ALERT\_2\_G Number of Uiso or Uij Restrained non-H Atoms ... 2 Report

PLAT007\_ALERT\_5\_G Number of Unrefined Donor-H Atoms ..... 6 Report

H003 H00M H00C H00E H00F H00G

PLAT033\_ALERT\_4\_G Flack x Value Deviates > 3.0 \* sigma from Zero . 0.500 Note

PLAT045\_ALERT\_1\_G Calculated and Reported Z Differ by a Factor ... 0.500 Check

PLAT072\_ALERT\_2\_G SHELXL First Parameter in WGHT Unusually Large 0.16 Report

PLAT172\_ALERT\_4\_G The CIF-Embedded .res File Contains DFIX Records 3 Report



```

PLAT177_ALERT_4_G The CIF-Embedded .res File Contains DELU Records          1 Report
PLAT300_ALERT_4_G Atom Site Occupancy of H15          Constrained at      0.3333 Check
PLAT300_ALERT_4_G Atom Site Occupancy of H00M          Constrained at      0.5 Check
PLAT417_ALERT_2_G Short Inter D-H..H-D          H00G      ..H00M      .      1.87 Ang.
                                     -1/2+z,3/2-x,3/2-y =      18_466 Check
PLAT650_ALERT_4_G SWAT Instruction Used to Model Solvent Disorder          ! Report
PLAT720_ALERT_4_G Number of Unusual/Non-Standard Labels .....      36 Note
      O001      O002      O003      H003      O004      N005      H00C      H00E
      H00F      H00G      C006      N007      C008      C009      C00A      H00A
      C00B      H00B      C00C      C00D      H00D      N00E      C00F      C00G
      C00H      H00H      C00I      H00I      C00J      H00J      C00K      H00K
      C00L      H00L      O00M      H00M
PLAT721_ALERT_1_G Bond      Calc      0.93000, Rep      0.91970 Dev...      0.01 Ang.
      C15      -H15      1_555      12_676 .....      #      43 Check
PLAT721_ALERT_1_G Bond      Calc      0.93000, Rep      0.91970 Dev...      0.01 Ang.
      C15      -H15      1_555      6_467 .....      #      44 Check
PLAT721_ALERT_1_G Bond      Calc      0.93000, Rep      0.91970 Dev...      0.01 Ang.
      C15      -H15      1_555      1_555 .....      #      45 Check
PLAT779_ALERT_4_G Suspect or Irrelevant (Bond) Angle(s) in CIF ...      25.90 Deg.
      C15      -I1      -H15      1_555      1_555      6_467 .....      #      59 Check
PLAT779_ALERT_4_G Suspect or Irrelevant (Bond) Angle(s) in CIF ...      16.50 Deg.
      H15      -C15      -H15      6_467      1_555      12_676 .....      #      72 Check
PLAT779_ALERT_4_G Suspect or Irrelevant (Bond) Angle(s) in CIF ...      16.50 Deg.
      H15      -C15      -H15      1_555      1_555      6_467 .....      #      73 Check
PLAT779_ALERT_4_G Suspect or Irrelevant (Bond) Angle(s) in CIF ...      16.50 Deg.
      H15      -C15      -H15      1_555      1_555      12_676 .....      #      74 Check
PLAT860_ALERT_3_G Number of Least-Squares Restraints .....      3 Note
PLAT910_ALERT_3_G Missing # of FCF Reflection(s) Below Theta (Min).      2 Note
      0      1      1,      0      0      2,
PLAT933_ALERT_2_G Number of HKL-OMIT Records in Embedded .res File      1 Note
      0      3      3,
PLAT952_ALERT_5_G Calculated (ThMax) and CIF-Reported Lmax Differ.      4 Units
PLAT955_ALERT_1_G Reported (CIF) and Actual (FCF) Lmax Differ by .      4 Units
PLAT978_ALERT_2_G Number C-C Bonds with Positive Residual Density.      1 Info

```

---

```

0 ALERT level A = Most likely a serious problem - resolve or explain
1 ALERT level B = A potentially serious problem, consider carefully
12 ALERT level C = Check. Ensure it is not caused by an omission or oversight
26 ALERT level G = General information/check it is not something unexpected

```

```

8 ALERT type 1 CIF construction/syntax error, inconsistent or missing data
12 ALERT type 2 Indicator that the structure model may be wrong or deficient
4 ALERT type 3 Indicator that the structure quality may be low
13 ALERT type 4 Improvement, methodology, query or suggestion
2 ALERT type 5 Informative message, check

```

---

## Validation response form

Please find below a validation response form (VRF) that can be filled in and pasted into your CIF.

```

# start Validation Reply Form
_vrf_STRVA01_cu_tca_i6_0m
;
PROBLEM: Flack test results are ambiguous.
RESPONSE: ...

```



```

;
_vrf_PLAT042_cu_tca_i6_0m
;
PROBLEM: Calc. and Reported MoietyFormula Strings Differ      Please Check
RESPONSE: ...
;
_vrf_PLAT057_cu_tca_i6_0m
;
PROBLEM: Correction for Absorption Required   RT(exp) ...      1.17 Do !
RESPONSE: ...
;
_vrf_PLAT202_cu_tca_i6_0m
;
PROBLEM: Isotropic non-H Atoms in Anion/Solvent .....        2 Check
RESPONSE: ...
;
_vrf_PLAT241_cu_tca_i6_0m
;
PROBLEM: High   'MainMol' Ueq as Compared to Neighbors of      C00K Check
RESPONSE: ...
;
_vrf_PLAT260_cu_tca_i6_0m
;
PROBLEM: Large Average Ueq of Residue Including      O00M      0.149 Check
RESPONSE: ...
;
_vrf_PLAT790_cu_tca_i6_0m
;
PROBLEM: Centre of Gravity not Within Unit Cell: Resd. #      1 Note
RESPONSE: ...
;
_vrf_PLAT927_cu_tca_i6_0m
;
PROBLEM: Reported and Calculated   wR2 Differ by .....        0.0022 Check
RESPONSE: ...
;
_vrf_PLAT976_cu_tca_i6_0m
;
PROBLEM: Check Calcd Resid. Dens.   0.65Ang From O00M      .      -0.68 eA-3
RESPONSE: ...
;
_vrf_PLAT977_cu_tca_i6_0m
;
PROBLEM: Check Negative Difference Density on H00M      .      -0.32 eA-3
RESPONSE: ...
;
_vrf_PLAT987_cu_tca_i6_0m
;
PROBLEM: The Flack x is >> 0 -   Do a BASF/TWIN Refinement    Please Check
RESPONSE: ...
;
# end Validation Reply Form

```

---



It is advisable to attempt to resolve as many as possible of the alerts in all categories. Often the minor alerts point to easily fixed oversights, errors and omissions in your CIF or refinement strategy, so attention to these fine details can be worthwhile. In order to resolve some of the more serious problems it may be necessary to carry out additional measurements or structure refinements. However, the purpose of your study may justify the reported deviations and the more serious of these should normally be commented upon in the discussion or experimental section of a paper or in the "special\_details" fields of the CIF. checkCIF was carefully designed to identify outliers and unusual parameters, but every test has its limitations and alerts that are not important in a particular case may appear. Conversely, the absence of alerts does not guarantee there are no aspects of the results needing attention. It is up to the individual to critically assess their own results and, if necessary, seek expert advice.

### **Publication of your CIF in IUCr journals**

A basic structural check has been run on your CIF. These basic checks will be run on all CIFs submitted for publication in IUCr journals (*Acta Crystallographica*, *Journal of Applied Crystallography*, *Journal of Synchrotron Radiation*); however, if you intend to submit to *Acta Crystallographica Section C* or *E* or *IUCrData*, you should make sure that full publication checks are run on the final version of your CIF prior to submission.

### **Publication of your CIF in other journals**

Please refer to the *Notes for Authors* of the relevant journal for any special instructions relating to CIF submission.
