# Supplementary material for: Supramolecular Polynuclear Clusters Mediated Assembly of Cubic Hydrogen-Bonded Organic Frameworks with Octahedral Cages for Reversible Photochromism
Source: Research Square preprint supplement (doi:10.21203/rs.3.rs-3670187/v1), 2023-12-07
Supplement: Supplementary file 4 [file b7dbaf47e5c13d097cc8464c.pdf]

## checkCIF/PLATON report

Structure factors have been supplied for datablock(s) cu\_tca\_nh4\_1\_0m\_a\_sq

THIS REPORT IS FOR GUIDANCE ONLY. IF USED AS PART OF A REVIEW PROCEDURE FOR PUBLICATION, IT SHOULD NOT REPLACE THE EXPERTISE OF AN EXPERIENCED CRYSTALLOGRAPHIC REFEREE.

No syntax errors found.      CIF dictionary      Interpreting this report

### Datablock: cu\_tca\_nh4\_1\_0m\_a\_sq

---

Bond precision:      C-C = 0.0098 Å      Wavelength=1.54178

Cell:                      a=20.9737(2)              b=20.9737(2)              c=20.9737(2)  
                                alpha=90              beta=90              gamma=90

Temperature:              170 K

|                        | Calculated                                                    | Reported                                                        |
|------------------------|---------------------------------------------------------------|-----------------------------------------------------------------|
| Volume                 | 9226.3(3)                                                     | 9226.2(3)                                                       |
| Space group            | I 2 3                                                         | I 2 3                                                           |
| Hall group             | I 2 2 3                                                       | I 2 2 3                                                         |
| Moiety formula         | 2(C21 H12 N O6), 2(C21 H15 N O6), 3(H O), 6(H4 N) [+ solvent] | 2(C21 H12 N O6), 2(C21 H15 N O6), 6(H4 N), 1.5(H2 O2), 0.875[C3 |
| Sum formula            | C84 H81 N10 O27 [+ solvent]                                   | C86.62 H87.12 N10.88 O27.88                                     |
| Mr                     | 1662.59                                                       | 1726.63                                                         |
| Dx, g cm <sup>-3</sup> | 1.197                                                         | 1.243                                                           |
| Z                      | 4                                                             | 4                                                               |
| Mu (mm <sup>-1</sup> ) | 0.761                                                         | 0.789                                                           |
| F000                   | 3484.0                                                        | 3624.0                                                          |
| F000'                  | 3496.08                                                       |                                                                 |
| h, k, lmax             |                                                               | 23, 24, 24                                                      |
| Nref                   |                                                               | 2724                                                            |
| Tmin, Tmax             | 0.759, 0.815                                                  | 0.602, 0.753                                                    |
| Tmin'                  | 0.759                                                         |                                                                 |

Correction method= # Reported T Limits: Tmin=0.602 Tmax=0.753

AbsCorr = NONE

Data completeness=

Theta(max)= 66.444

R(reflections)= 0.0745( 2004)

wR2(reflections)=  
0.2270( 2724)

S = 1.019

Npar= 184

The following ALERTS were generated. Each ALERT has the format

**test-name\_ALERT\_alert-type\_alert-level.**

Click on the hyperlinks for more details of the test.

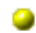

### Alert level C

RINTA01\_ALERT\_3\_C The value of Rint is greater than 0.12  
Rint given 0.153

PLAT020\_ALERT\_3\_C The Value of Rint is Greater Than 0.12 ..... 0.153 Report

PLAT241\_ALERT\_2\_C High 'MainMol' Ueq as Compared to Neighbors of C00J Check

PLAT250\_ALERT\_2\_C Large U3/U1 Ratio for Average U(i,j) Tensor .... 3.2 Note

PLAT250\_ALERT\_2\_C Large U3/U1 Ratio for Average U(i,j) Tensor .... 3.6 Note

PLAT260\_ALERT\_2\_C Large Average Ueq of Residue Including O00M 0.207 Check

PLAT340\_ALERT\_3\_C Low Bond Precision on C-C Bonds ..... 0.00979 Ang.

PLAT790\_ALERT\_4\_C Centre of Gravity not Within Unit Cell: Resd. # 1 Note  
C21 H12 N O6

PLAT911\_ALERT\_3\_C Missing FCF Refl Between Thmin & STh/L= 0.595 2 Report  
2 0 4, 2 2 4,

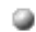

### Alert level G

FORMU01\_ALERT\_2\_G There is a discrepancy between the atom counts in the  
\_chemical\_formula\_sum and the formula from the \_atom\_site\* data.  
Atom count from \_chemical\_formula\_sum: C86.62 H87.12 N10.88 O27.88  
Atom count from the \_atom\_site data: C84 H81 N10 O27

CELLZ01\_ALERT\_1\_G Difference between formula and atom\_site contents detected.

CELLZ01\_ALERT\_1\_G ALERT: Large difference may be due to a  
symmetry error - see SYMMG tests  
From the CIF: \_cell\_formula\_units\_Z 4  
From the CIF: \_chemical\_formula\_sum C86.62 H87.12 N10.88 O27.88  
TEST: Compare cell contents of formula and atom\_site data

| atom | Z*formula | cif sites | diff  |
|------|-----------|-----------|-------|
| C    | 346.48    | 336.00    | 10.48 |
| H    | 348.48    | 324.00    | 24.48 |
| N    | 43.52     | 40.00     | 3.52  |
| O    | 111.52    | 108.00    | 3.52  |

PLAT007\_ALERT\_5\_G Number of Unrefined Donor-H Atoms ..... 6 Report  
H002 H00M H00A H00C H00F H00H

PLAT041\_ALERT\_1\_G Calc. and Reported SumFormula Strings Differ Please Check  
Calc: C84 H81 N10 O27  
Rep.: C86.62 H87.12 N10.88 O27.88

PLAT042\_ALERT\_1\_G Calc. and Reported MoietyFormula Strings Differ Please Check  
Calc: 2(C21 H12 N O6), 2(C21 H15 N O6), 3(H O), 6(H4 N)  
Rep.: 2(C21 H12 N O6), 2(C21 H15 N O6), 6(H4 N), 1.5(H2 O2), 0.875

PLAT072\_ALERT\_2\_G SHELXL First Parameter in WGHT Unusually Large 0.16 Report

PLAT300\_ALERT\_4\_G Atom Site Occupancy of H00M Constrained at 0.5 Check

PLAT605\_ALERT\_4\_G Largest Solvent Accessible VOID in the Structure 712 A\*\*3

PLAT720\_ALERT\_4\_G Number of Unusual/Non-Standard Labels ..... 36 Note

|      |      |      |      |      |      |      |      |
|------|------|------|------|------|------|------|------|
| O001 | O002 | H002 | O003 | O004 | N005 | N006 | H00A |
| H00C | H00F | H00H | C007 | C008 | C009 | C00A | C00B |

|                   | H00B                                             | C00C                          | C00D       | H00D | C00E | H00E | N00F | C00G       |
|-------------------|--------------------------------------------------|-------------------------------|------------|------|------|------|------|------------|
|                   | H00G                                             | C00H                          | C00I       | H00I | C00J | H00J | C00K | H00K       |
|                   | C00L                                             | H00L                          | O00M       | H00M |      |      |      |            |
| PLAT869_ALERT_4_G | ALERTS                                           | Related to the Use of SQUEEZE | Suppressed |      |      |      |      | ! Info     |
| PLAT909_ALERT_3_G | Percentage of I>2sig(I)                          | Data at Theta(Max)            | Still      |      |      |      |      | 44% Note   |
| PLAT910_ALERT_3_G | Missing # of FCF Reflection(s)                   | Below Theta(Min).             |            |      |      |      |      | 2 Note     |
|                   | 0                                                | 1                             | 1,         | 0    | 0    | 2,   |      |            |
| PLAT916_ALERT_2_G | Hoof t y and Flack x                             | Parameter Values Differ by    | .          |      |      |      |      | 0.20 Check |
| PLAT933_ALERT_2_G | Number of HKL-OMIT Records in Embedded .res File |                               |            |      |      |      |      | 3 Note     |
|                   | -2                                               | 2                             | 4,         | 2    | 0    | 4,   | 2    | 2          |
|                   |                                                  |                               | 4,         |      |      |      |      |            |
| PLAT978_ALERT_2_G | Number C-C Bonds with Positive Residual Density. |                               |            |      |      |      |      | 0 Info     |

---

0 **ALERT level A** = Most likely a serious problem - resolve or explain  
0 **ALERT level B** = A potentially serious problem, consider carefully  
9 **ALERT level C** = Check. Ensure it is not caused by an omission or oversight  
16 **ALERT level G** = General information/check it is not something unexpected

4 ALERT type 1 CIF construction/syntax error, inconsistent or missing data  
9 ALERT type 2 Indicator that the structure model may be wrong or deficient  
6 ALERT type 3 Indicator that the structure quality may be low  
5 ALERT type 4 Improvement, methodology, query or suggestion  
1 ALERT type 5 Informative message, check

---

## Validation response form

Please find below a validation response form (VRF) that can be filled in and pasted into your CIF.

```
# start Validation Reply Form
_vrf_RINTA01_cu_tca_nh4_1_0m_a_sq
;
PROBLEM: The value of Rint is greater than 0.12
RESPONSE: ...
;
_vrf_PLAT020_cu_tca_nh4_1_0m_a_sq
;
PROBLEM: The Value of Rint is Greater Than 0.12 ..... 0.153 Report
RESPONSE: ...
;
_vrf_PLAT241_cu_tca_nh4_1_0m_a_sq
;
PROBLEM: High 'MainMol' Ueq as Compared to Neighbors of C00J Check
RESPONSE: ...
;
_vrf_PLAT250_cu_tca_nh4_1_0m_a_sq
;
PROBLEM: Large U3/U1 Ratio for Average U(i,j) Tensor .... 3.2 Note
RESPONSE: ...
;
_vrf_PLAT260_cu_tca_nh4_1_0m_a_sq
;
PROBLEM: Large Average Ueq of Residue Including O00M 0.207 Check
RESPONSE: ...
;
_vrf_PLAT340_cu_tca_nh4_1_0m_a_sq
;
```

```

PROBLEM: Low Bond Precision on  C-C Bonds .....      0.00979 Ang.
RESPONSE: ...
;
_vrf_PLAT790_cu_tca_nh4_1_0m_a_sq
;
PROBLEM: Centre of Gravity not Within Unit Cell: Resd.  #          1 Note
RESPONSE: ...
;
_vrf_PLAT911_cu_tca_nh4_1_0m_a_sq
;
PROBLEM: Missing FCF Refl Between Thmin & STh/L=      0.595          2 Report
RESPONSE: ...
;
# end Validation Reply Form

```

---

It is advisable to attempt to resolve as many as possible of the alerts in all categories. Often the minor alerts point to easily fixed oversights, errors and omissions in your CIF or refinement strategy, so attention to these fine details can be worthwhile. In order to resolve some of the more serious problems it may be necessary to carry out additional measurements or structure refinements. However, the purpose of your study may justify the reported deviations and the more serious of these should normally be commented upon in the discussion or experimental section of a paper or in the "special\_details" fields of the CIF. checkCIF was carefully designed to identify outliers and unusual parameters, but every test has its limitations and alerts that are not important in a particular case may appear. Conversely, the absence of alerts does not guarantee there are no aspects of the results needing attention. It is up to the individual to critically assess their own results and, if necessary, seek expert advice.

### **Publication of your CIF in IUCr journals**

A basic structural check has been run on your CIF. These basic checks will be run on all CIFs submitted for publication in IUCr journals (*Acta Crystallographica*, *Journal of Applied Crystallography*, *Journal of Synchrotron Radiation*); however, if you intend to submit to *Acta Crystallographica Section C* or *E* or *IUCrData*, you should make sure that full publication checks are run on the final version of your CIF prior to submission.

### **Publication of your CIF in other journals**

Please refer to the *Notes for Authors* of the relevant journal for any special instructions relating to CIF submission.

---

**PLATON version of 14/11/2023; check.def file version of 14/09/2023**
